# Supplementary material for: Decomposing type 2 diabetes genetics into population-specific features by 600,000 East-Asians
Source: Research Square preprint supplement (doi:10.21203/rs.3.rs-6532678/v1), 2025-05-12
Supplement: Supplementary file 2 [file 8fc77af2621166ab8316efba.xlsx]

## Sheet: Contents
Contents
Table	Title
ST1	Supplementary Table 1. Summary of single-ancestry GWASs
ST2	Supplementary Table 2. A List of T2D-associated loci and lead/secondary SNPs that were only present in the EAS-meta or the EUR-meta
ST3	Supplementary Table 3. Summary of cross-ancestry meta-analysis
ST4	Supplementary Table 4. T2D-associated loci where were specifically significant in single-ancestry meta-analysis
ST5	Supplementary Table 5. Insulin high beta cells driving heritability enrichment of T2D in pancreatic alpha, delta, and gamma cells
ST6	Supplementary Table 6. T2D-associated loci where were significantly heterogeneous at lead SNP level
ST7	Supplementary Table 7. Pathway analysis of the two prioritized gene set derived from 30 EAS-stronger and 56 EUR-stronger T2D-associated Loci from EAS-meta and EUR-meta.
ST8	Supplementary Table 8. Differential T2D susceptibility for each trait related to insulin secretion and resistance
ST9	Supplementary Table 9. Comparison of GRS associated with insulin resistance and insulin secretion in East Asian (individuals from Shizuoka General Hospital) and European (individuals from UK Biobank) Populations
ST10	Supplementary Table 10. Summary of GRS profiles and variant weights
ST11	Supplementary Table 11. Study Design in the new East Asian GWAS cohorts
ST12	Supplementary Table 12. A list of unreported T2D-associated loci
ST13	Supplementary Table 13. Functional variants within high LD variants with lead SNPs
ST14	Supplementary Table 14. Comparison of 95% credible sets among 100 commonly shared T2D associated regions
EAS: East Asian; EUR: European; GRS: Genetic Risk Score; GWAS: Genome Wide Association Study; LD: Linkage disequilibrium; SNP: single nucleotide polymorphisms; T2D: Type 2 Diabetes

## Sheet: ST1
Supplementary Table 1. Summary of single-ancestry GWASs
This table compared down stream analysis results between EAS-meta and EUR-meta. EAS-meta and EUR-meta revealed 196 and 199 primary variants along with 82 and 60 secondary variants, respectively. For details on variant classification, annotation methods, and statistical approaches, see the Method and Supplementary Note sections of the paper. ABF: Allele-Based Frequency, BP: Base Position, BETA: Ef…
Region_subID	Region Ranges	Significance	Lead Variant (CHR:BP:EA:NEA)	Lead Variant (rsID)	Varinat Type	Nearest Gene	Nearest Gene Function	ABF		Heterogeneity		Direction (EAS-meta - EUR-meta)	EAS-meta				EUR-meta				Putative Genes	Prioritized Gene	ZBTB20-AS4 [Pan-related <PAN_ABC (PAN_Nasser)> / Non_PAN_ABC (Adp; LIV; MuSc; THY; ADR; Brain; SI; Co)] / ZBTB20 [nearest(intergenic)]
								PIP	ABF_95	I2	HetPVal		EAF	BETA	SE	P	EAF	BETA	SE	P
EAS-meta-1	1:20638550 - 1:20738550	EAS	1:20688352:C:T	rs60573766	Primary	VWA5B1(+7kb)	intergenic	0.23	11	59.4	0.116	--	0.364	-0.041	0.006	4.31e-11	0.128	-0.023	0.01	0.014	CAMK2N1;VWA5B1	CAMK2N1	CAMK2N1 [Strongly-Pan-related <PAN_ABC (acinar)>] / VWA5B1 [nearest(intergenic) / Non_PAN_ABC (Brain)]
EAS-meta-2	1:39798347 - 1:39898347	EAS/EUR	1:39942297:C:G	rs61779310	Primary	MACF1	intronic	0.1	99	57.2	0.126	--	0.151	0.057	0.008	5.8e-12	0.242	0.074	0.007	2.11e-23	MACF1;PABPC4;BMP8A;KIAA0754;PPIEL	MACF1	MACF1 [nearest(intronic) / Very-Strongly-Pan-related <PAN_ABC (beta; alpha; acinar; ductal)> / Non_PAN_ABC (Brain); Non_PAN_SMR <Pos_Exp (Brain)>] / PABPC4 [Very-Strongly-Pan-related <PAN_ABC (beta; alpha; acinar; ductal; PAN_Nasser)> / Non_PAN_ABC (Adp; LIV; MuSc; ADR; Brain; SI; Co); Non_PAN_SMR <Pos_Exp (Adp-Sub; Adp-Vis; MuSc; THY; Co; Blood)>] / BMP8A [Pan-related <PAN_ABC (PAN_Nasser)> / No…
EUR-meta-1	1:39798347 - 1:39898347	EAS/EUR	1:40035928:G:T	rs3768321	Primary	PABPC4	intronic	0.08	15	81.8	0.0192	++	0.127	0.056	0.009	6.48e-10	0.199	0.084	0.008	4.75e-26	PABPC4;PPIEL;BMP8A;NT5C1A;RP11-69E11.8	PABPC4	PABPC4 [nearest(intronic) / Very-Strongly-Pan-related <PAN_ABC (beta; alpha; acinar; ductal; PAN_Nasser)> / Non_PAN_ABC (Adp; LIV; MuSc; ADR; Brain; SI; Co); Non_PAN_SMR <Pos_Exp (Adp-Sub; Adp-Vis; MuSc; THY; PIT; Co; Blood)>] / PPIEL [Very-Strongly-Pan-related <PAN_ABC (beta; PAN_Nasser)> / Non_PAN_ABC (Adp; LIV; MuSc; THY; ADR; Brain; SI; Co)] / BMP8A [Non_PAN_ABC (LIV; MuSc); Non_PAN_SMR <Pos_…
EAS-meta-3	1:46202144 - 1:46302144	EAS	1:46244900:C:CT	rs5773893	Primary	MAST2(-7.8kb)	intergenic	0.01	272	NA	NA	-?	0.274	-0.054	0.008	6.34e-12	NA	NA	NA	NA	MAST2;AKR1A1;CCDC17;IPP;NASP	MAST2	MAST2 [nearest(intergenic) / Non_PAN_SMR <Pos_Exp (Adp-Sub; Adp-Vis; Brain; Co) / Neg_Exp (THY; Blood)>] / AKR1A1 [Non_PAN_SMR <Pos_Exp (Blood)>] / CCDC17 [Non_PAN_SMR <Pos_Exp (THY) / Neg_Exp (Blood)>] / IPP [Non_PAN_SMR <Neg_Exp (Brain; Blood)>] / NASP [Non_PAN_SMR <Pos_Exp (Blood)>]
EAS-meta-4	1:51141935 - 1:51241935	EAS/EUR	1:51103180:T:G	rs72900928	Primary	FAF1	intronic	0.03	153	61.3	0.108	++	0.097	-0.09	0.01	3.49e-18	0.09	-0.066	0.011	5.92e-09	FAF1;CDKN2C;RNF11;TTC39A;NRD1	FAF1	FAF1 [nearest(intronic) / Very-Strongly-Pan-related <PAN_ABC (beta; alpha; acinar; ductal; PAN_Nasser)> / Non_PAN_ABC (Adp; LIV; MuSc; THY; ADR; Brain; SI; Co)] / CDKN2C [Very-Strongly-Pan-related <PAN_ABC (beta; ductal; PAN_Nasser)> / Non_PAN_ABC (Adp; LIV; MuSc; THY; ADR; Brain; SI; Co)] / RNF11 [Very-Strongly-Pan-related <PAN_ABC (beta; alpha; acinar; PAN_Nasser)> / Non_PAN_ABC (Adp; LIV; MuSc…
EUR-meta-2	1:51141935 - 1:51241935	EAS/EUR	1:51256091:C:T	rs58432198	Primary	FAF1	intronic	0.05	185	64.1	0.0953	--	0.096	-0.088	0.01	1.61e-17	0.117	-0.064	0.01	5.71e-10	FAF1;CDKN2C;RNF11;TTC39A;NRD1	FAF1	FAF1 [nearest(intronic) / Very-Strongly-Pan-related <PAN_ABC (beta; alpha; acinar; ductal; PAN_Nasser)> / Non_PAN_ABC (Adp; LIV; MuSc; THY; ADR; Brain; SI; Co)] / CDKN2C [Very-Strongly-Pan-related <PAN_ABC (beta; ductal; PAN_Nasser)> / Non_PAN_ABC (Adp; LIV; MuSc; THY; ADR; Brain; SI; Co)] / RNF11 [Very-Strongly-Pan-related <PAN_ABC (beta; alpha; acinar; PAN_Nasser)> / Non_PAN_ABC (Adp; LIV; MuSc…
EUR-meta-3	1:62529891 - 1:62629891	EUR	1:62579891:G:T	rs12140153	Primary	INADL	exonic	1	1	NA	NA	?-	NA	NA	NA	NA	0.095	-0.064	0.011	1.17e-08	INADL;KANK4;ALG6;EFCAB7;FOXD3	INADL	INADL [nearest(exonic) / rs12140153 [VEP_Medium: R2 (EAS:EUR=1:1)] / Non_PAN_ABC (Brain)] / KANK4 [Pan-related <PAN_ABC (PAN_Nasser)> / Non_PAN_ABC (MuSc; Brain)] / ALG6 [Non_PAN_ABC (Brain)] / EFCAB7 [Non_PAN_ABC (Brain)] / FOXD3 [Non_PAN_ABC (Brain)]
EAS-meta-5	1:64057284 - 1:64157284	EAS	1:64107028:A:G	rs2301054	Primary	PGM1	intronic	0.13	21	52.3	0.148	++	0.185	-0.053	0.009	9.21e-10	0.202	-0.036	0.008	6.44e-06	PGM1;AK4;JAK1;RAVER2;RP11-182I10.3	PGM1	PGM1 [nearest(intronic) / rs11208257 [VEP_Medium: R2 (EAS:EUR=0.97:0.93)] / Non_PAN_ABC (LIV; Co)] / AK4 [Non_PAN_ABC (LIV)] / JAK1 [Non_PAN_ABC (LIV)] / RAVER2 [Non_PAN_ABC (LIV)] / RP11-182I10.3 [Non_PAN_ABC (LIV)]
EUR-meta-4	1:117482790 - 1:117582790	EUR	1:117532790:C:T	rs1127215	Primary	PTGFRN	3UTR	0.99	1	84.8	0.0103	--	0.263	-0.025	0.007	0.000405	0.415	-0.049	0.006	3.92e-14	PTGFRN;C1orf137;CD2;IGSF3;TTF2	PTGFRN	PTGFRN [nearest(3UTR) / rs10801922 [VEP_Low: R2 (EAS:EUR=ND:0.86)] / Non_PAN_ABC (MuSc)] / C1orf137 [Non_PAN_ABC (MuSc)] / CD2 [Non_PAN_ABC (MuSc)] / IGSF3 [Non_PAN_ABC (MuSc)] / TTF2 [Non_PAN_ABC (MuSc)]
EUR-meta-5	1:118093948 - 1:118193948	EUR	1:118143517:G:A	rs320369	Primary	FAM46C(-5kb)	intergenic	0.29	10	45	0.178	++	0.143	0.022	0.009	0.0131	0.323	0.037	0.007	4.6e-08	FAM46C;GDAP2;LOC100996263;LOC105378933;MAN1A2	FAM46C	FAM46C [nearest(intergenic) / Very-Strongly-Pan-related <PAN_ABC (beta; alpha; acinar; ductal; PAN_Nasser)> / Non_PAN_ABC (Adp; LIV; MuSc; THY; ADR; Brain; SI; Co)] / GDAP2 [Very-Strongly-Pan-related <PAN_ABC (beta; alpha; acinar; ductal; PAN_Nasser)> / Non_PAN_ABC (LIV; MuSc; THY; ADR; Brain; SI; Co)] / LOC100996263 [Very-Strongly-Pan-related <PAN_ABC (beta; alpha; acinar; ductal)>] / LOC1053789…
EUR-meta-6	1:120476982 - 1:120576982	EUR	1:120526982:C:T	rs1493694	Primary	NOTCH2	intronic	0.1	35	32.1	0.225	++	0.025	0.054	0.019	0.00557	0.11	0.08	0.01	3.35e-15	NOTCH2;ADAM30;RP5-1042I8.7	NOTCH2	NOTCH2 [nearest(intronic) / Pan-related <PAN-SMR (Pos_Exp)> / Non_PAN_SMR <Pos_Exp (LIV)>] / ADAM30 [rs2641348 [VEP_Low: R2 (EAS:EUR=1:0.93)]] / RP5-1042I8.7 [Non_PAN_SMR <Pos_Exp (Adp-Vis)>]
EAS-meta-6	1:177831424 - 1:177931424	EAS/EUR	1:177881424:G:A	rs1266155	Primary	SEC16B(-11.7kb)	intergenic	0.08	13	0	0.854	++	0.205	0.052	0.007	1.09e-12	0.2	0.054	0.008	9.67e-12	SEC16B	SEC16B	SEC16B [nearest(intergenic)]
EUR-meta-7	1:177831424 - 1:177931424	EAS/EUR	1:177873841:G:A	rs490689	Primary	SEC16B(-19.2kb)	intergenic	0.11	22	0	0.832	++	0.205	0.052	0.007	1.31e-12	0.2	0.054	0.008	8.86e-12	SEC16B	SEC16B	SEC16B [nearest(intergenic)]
EAS-meta-7	1:183967131 - 1:184067131	EAS	1:184017131:A:G	rs10797937	Primary	TSEN15(-3.7kb)	intergenic	0.12	12	70.4	0.0662	--	0.462	0.036	0.006	9.47e-10	0.352	0.02	0.007	0.00298	TSEN15;COLGALT2;HMCN1;SWT1;TRMT1L	TSEN15	TSEN15 [nearest(intergenic) / rs1046934 [VEP_Medium: R2 (EAS:EUR=1:1)] / Very-Strongly-Pan-related <PAN_ABC (beta; alpha; acinar; ductal; PAN_Nasser)> / Non_PAN_ABC (Adp; LIV; MuSc; THY; ADR; Brain; SI; Co); Non_PAN_SMR <Pos_Exp (Brain)>] / COLGALT2 [Very-Strongly-Pan-related <PAN_ABC (beta; PAN_Nasser)> / Non_PAN_ABC (Adp; LIV; MuSc; THY; ADR; Brain; Co)] / HMCN1 [Pan-related <PAN_ABC (PAN_Nasse…
EAS-meta-8	1:204489291 - 1:204589291	EAS	1:204474581:C:CAAAAAAAA	rs774192747	Primary	PIK3C2B(+10.7kb)	intergenic	0.69	14	NA	NA	+?	0.442	0.039	0.007	1.59e-08	NA	NA	NA	NA	PIK3C2B	PIK3C2B	PIK3C2B [nearest(intergenic)]
EUR-meta-8	1:204994339 - 1:205094339	EUR	1:205099959:C:A	rs3862948	Primary	RBBP5(+8.8kb)	intergenic	0.07	29	91.7	0.000514	++	0.407	0.007	0.007	0.306	0.235	0.041	0.007	3.98e-08	RBBP5;DSTYK;TMCC2	RBBP5	RBBP5 [nearest(intergenic) / Non_PAN_ABC (Brain)] / DSTYK [Non_PAN_ABC (MuSc; Brain)] / TMCC2 [Non_PAN_ABC (MuSc; Brain)]
EUR-meta-9	1:206550992 - 1:206650992	EUR	1:206593900:C:G	rs9430095	Primary	SRGAP2	intronic	0.52	7	42.6	0.187	++	0.212	-0.022	0.008	0.00302	0.507	-0.036	0.006	4.16e-08	SRGAP2;AVPR1B;IKBKE	SRGAP2	SRGAP2 [nearest(intronic)] / AVPR1B [Non_PAN_ABC (MuSc)] / IKBKE [Non_PAN_ABC (MuSc)]
EAS-meta-9	1:214109256 - 1:214209256	EAS/EUR	1:214158986:C:G	rs340875	Primary	PROX1	intronic	0.38	6	0	0.459	++	0.469	-0.042	0.006	1.72e-12	0.496	-0.049	0.006	1.91e-14	PROX1;PROX1-AS1;SMYD2;CENPF;RPS6KC1	PROX1	PROX1 [nearest(intronic) / Very-Strongly-Pan-related <PAN_ABC (beta; alpha; ductal; PAN_Nasser)> / Non_PAN_ABC (Adp; LIV; MuSc; THY; ADR; Brain; SI; Co)] / PROX1-AS1 [Pan-related <PAN_ABC (PAN_Nasser)> / Non_PAN_ABC (Adp; LIV; MuSc; THY; ADR; Brain; SI; Co); Non_PAN_SMR <Neg_Exp (Brain)>] / SMYD2 [Very-Strongly-Pan-related <PAN_ABC (beta; PAN_Nasser)> / Non_PAN_ABC (MuSc; ADR; Brain)] / CENPF [Pa…
EUR-meta-10	1:214109256 - 1:214209256	EAS/EUR	1:214159256:T:C	rs340874	Primary	PROX1	intronic	1	1	88.2	0.00367	--	0.384	0.042	0.006	1.35e-11	0.551	0.068	0.006	1.55e-25	PROX1;PROX1-AS1;SMYD2	PROX1	PROX1 [nearest(intronic) / Very-Strongly-Pan-related <PAN_ABC (beta; PAN_Nasser)> / Non_PAN_ABC (Adp; LIV; ADR; Brain; SI; Co)] / PROX1-AS1 [Strongly-Pan-related <PAN_ABC (PAN_Nasser) / PAN-SMR (Neg_Exp)> / Non_PAN_ABC (Adp; LIV; ADR; Brain; SI; Co); Non_PAN_SMR <Neg_Exp (Brain)>] / SMYD2 [Very-Strongly-Pan-related <PAN_ABC (beta)>]
EUR-meta-11	1:214109256 - 1:214209256	EAS/EUR	1:214150821:G:C	rs79687284	Secondary	PROX1(-5.7kb)	intergenic	NA	NA	NA	NA	?+	NA	NA	NA	NA	0.034	0.188	0.019	8.25e-24	PROX1;PROX1-AS1	PROX1-AS1	PROX1 [nearest(intergenic) / Pan-related <PAN_ABC (alpha; PAN_Nasser)> / Non_PAN_ABC (LIV)] / PROX1-AS1 [Strongly-Pan-related <PAN_ABC (PAN_Nasser) / PAN-SMR (Neg_Exp)> / Non_PAN_ABC (LIV); Non_PAN_SMR <Neg_Exp (Brain)>]
EUR-meta-12	1:219627532 - 1:219727532	EUR	1:219748818:C:G	rs2820446	Primary	SLC30A10(-110kb)	intergenic	0.16	18	92.9	0.000179	++	0.316	-0.024	0.006	0.00032	0.292	-0.059	0.007	2.83e-17	SLC30A10	SLC30A10	SLC30A10 [nearest(intergenic)]
EAS-meta-10	1:229622955 - 1:229722955	EAS/EUR	1:229672955:G:A	rs348330	Primary	ABCB10	intronic	0.84	2	0	0.992	--	0.318	-0.049	0.007	2.35e-12	0.64	-0.049	0.007	2.1e-13	ABCB10	ABCB10	ABCB10 [nearest(intronic)]
EUR-meta-13	1:229622955 - 1:229722955	EAS/EUR	1:229672955:G:A	rs348330	Primary	ABCB10	intronic	1	1	0	0.992	--	0.318	-0.049	0.007	2.35e-12	0.64	-0.049	0.007	2.1e-13	ABCB10	ABCB10	ABCB10 [nearest(intronic)]
EAS-meta-11	2:594953 - 2:694953	EAS/EUR	2:647577:G:A	rs10190313	Primary	TMEM18(-19.8kb)	intergenic	0.06	145	90.9	0.000927	--	0.091	-0.094	0.011	8.58e-19	0.172	-0.049	0.009	6.13e-09	TMEM18;PXDN	TMEM18	TMEM18 [nearest(intergenic) / Non_PAN_ABC (SI)] / PXDN [Non_PAN_ABC (SI)]
EUR-meta-15	2:594953 - 2:694953	EAS/EUR	2:653195:G:A	rs13396935	Secondary	TMEM18(-14.1kb)	intergenic	NA	NA	88.2	0.00359	--	0.091	-0.091	0.011	2.31e-17	0.171	-0.051	0.009	1.46e-09	TMEM18;PXDN	TMEM18	TMEM18 [nearest(intergenic) / Non_PAN_ABC (SI)] / PXDN [Non_PAN_ABC (SI)]
EUR-meta-14	2:594953 - 2:694953	EAS/EUR	2:422144:C:T	rs62107261	Primary	FAM150B(+133.3kb)	intergenic	0.46	141	NA	NA	?+	NA	NA	NA	NA	0.954	0.102	0.016	2.62e-10	FAM150B	FAM150B	FAM150B [nearest(intergenic)]
EUR-meta-16	2:16524669 - 2:16624669	EUR	2:16574669:A:G	rs11680058	Primary	FAM49A(-156.1kb)	intergenic	1	1	74.2	0.0491	++	0.15	-0.027	0.012	0.0226	0.135	-0.058	0.01	2.08e-08	FAM49A	FAM49A	FAM49A [nearest(intergenic)]
EUR-meta-17	2:25485543 - 2:25585543	EUR	2:25535543:T:C	rs34048824	Primary	DNMT3A	intronic	0.21	28	67	0.0819	++	0.2	-0.019	0.008	0.0124	0.431	-0.036	0.006	2.05e-08	DNMT3A;DTNB;POMC	DNMT3A	DNMT3A [nearest(intronic) / Pan-related <PAN_ABC (PAN_Nasser)>] / DTNB [Pan-related <PAN_ABC (PAN_Nasser)>] / POMC [Pan-related <PAN_ABC (PAN_Nasser)>]
EAS-meta-12	2:27680940 - 2:27780940	EAS/EUR	2:27730940:T:C	rs1260326	Primary	GCKR	exonic	0.24	4	0	0.527	--	0.464	0.059	0.006	3.55e-23	0.607	0.064	0.007	1.62e-22	GCKR;C2orf16;EIF2B4;FNDC4;KRTCAP3	GCKR	GCKR [nearest(exonic) / rs1260326 [VEP_Low: R2 (EAS:EUR=1:1)] / Non_PAN_SMR <Pos_Exp (THY)>] / C2orf16 [Non_PAN_SMR <Pos_Exp (THY)>] / EIF2B4 [Non_PAN_SMR <Neg_Exp (Blood)>] / FNDC4 [Non_PAN_SMR <Pos_Exp (THY)>] / KRTCAP3 [Non_PAN_SMR <Pos_Exp (THY) / Neg_Exp (Blood)>]
EUR-meta-18	2:27680940 - 2:27780940	EAS/EUR	2:27730940:T:C	rs1260326	Primary	GCKR	exonic	0.51	6	0	0.527	--	0.464	0.059	0.006	3.55e-23	0.607	0.064	0.007	1.62e-22	GCKR;AC074117.10;EIF2B4;GPN1;IFT172	GCKR	GCKR [nearest(exonic) / rs1260326 [VEP_Low: R2 (EAS:EUR=1:1)]] / AC074117.10 [Non_PAN_SMR <Pos_Exp (Adp-Vis)>] / EIF2B4 [Non_PAN_SMR <Pos_Exp (Blood)>] / GPN1 [Non_PAN_SMR <Neg_Exp (MuSc)>] / IFT172 [Non_PAN_SMR <Pos_Exp (Brain)>]
EUR-meta-19	2:43543000 - 2:43643000	EUR	2:43687879:C:T	rs17030845	Primary	THADA	intronic	0.14	31	94.4	2.5e-05	+-	0.008	0.047	0.038	0.212	0.101	-0.119	0.011	2.35e-28	THADA;AC010883.5;ZFP36L2	THADA	THADA [nearest(intronic) / rs7578597 [VEP_Medium: R2 (EAS:EUR=0.6:0.97)] / Non_PAN_SMR <Neg_Exp (Adp-Sub)>] / AC010883.5 [Non_PAN_SMR <Neg_Exp (Adp-Sub; Adp-Vis; THY; Co; Blood)>] / ZFP36L2 [Non_PAN_SMR <Neg_Exp (Adp-Sub)>]
EAS-meta-13	2:45140056 - 2:45240056	EAS	2:45190056:A:AC	rs5830819	Primary	SIX3(+16.8kb)	intergenic	0.32	4	NA	NA	-?	0.407	0.048	0.006	9e-15	NA	NA	NA	NA	SIX3;AC012354.6;SIX3-AS1	SIX3	SIX3 [nearest(intergenic) / Pan-related <PAN-SMR (Pos_Exp)>] / AC012354.6 [Pan-related <PAN-SMR (Pos_Exp)>] / SIX3-AS1 [Pan-related <PAN-SMR (Pos_Exp)>]
EAS-meta-14	2:58905028 - 2:59005028	EAS/EUR	2:59013226:A:C	rs6747219	Primary	FANCL(+544.7kb)	intergenic	0.11	44	0	0.415	--	0.195	0.043	0.008	1.37e-08	0.148	0.033	0.009	0.000208	FANCL	FANCL	FANCL [nearest(intergenic)]
EUR-meta-20	2:58905028 - 2:59005028	EAS/EUR	2:59307725:A:G	rs6545714	Primary	FANCL(+839.2kb)	intergenic	0.08	27	83.7	0.0132	--	0.339	0.014	0.006	0.0321	0.392	0.036	0.006	2.25e-08	FANCL	FANCL	FANCL [nearest(intergenic)]
EAS-meta-15	2:60536707 - 2:60636707	EAS/EUR	2:60584687:GA:G	2:60584687:GA:G	Primary	BCL11A(-93.6kb)	intergenic	0.42	8	NA	NA	-?	0.317	-0.057	0.007	1.28e-15	NA	NA	NA	NA	BCL11A	BCL11A	BCL11A [nearest(intergenic)]
EUR-meta-21	2:60536707 - 2:60636707	EAS/EUR	2:60585806:C:T	rs243019	Primary	BCL11A(-92.5kb)	intergenic	0.31	4	24.5	0.25	--	0.325	-0.048	0.006	7.38e-14	0.536	-0.059	0.006	3.37e-20	BCL11A;AC007381.3	BCL11A	BCL11A [nearest(intergenic) / Non_PAN_SMR <Pos_Exp (Blood)>] / AC007381.3 [Non_PAN_SMR <Pos_Exp (Blood)>]
EAS-meta-16	2:65595750 - 2:65695750	EAS/EUR	2:65645750:C:T	rs10166100	Primary	SPRED2	intronic	0.28	62	0	0.956	--	0.151	-0.053	0.009	7.62e-10	0.402	-0.054	0.006	1.7e-16	SPRED2;ACTR2;CEP68;RAB1A;SLC1A4	SPRED2	SPRED2 [nearest(intronic) / Very-Strongly-Pan-related <PAN_ABC (beta; alpha; acinar; ductal; PAN_Nasser)> / Non_PAN_ABC (Adp; LIV; MuSc; THY; ADR; Brain; SI; Co); Non_PAN_SMR <Neg_Exp (Blood)>] / ACTR2 [Very-Strongly-Pan-related <PAN_ABC (beta; alpha; acinar; ductal; PAN_Nasser)> / Non_PAN_ABC (Adp; LIV; MuSc; THY; ADR; Brain; Co)] / CEP68 [Pan-related <PAN_ABC (PAN_Nasser)> / Non_PAN_ABC (Adp; L…
EUR-meta-23	2:65595750 - 2:65695750	EAS/EUR	2:65296280:T:C	rs2252867	Secondary	CEP68	intronic	NA	NA	85.7	0.00821	++	0.324	-0.03	0.006	3.57e-06	0.367	-0.054	0.007	3.05e-16	CEP68;ACTR2;AFTPH;RAB1A;SLC1A4	CEP68	CEP68 [nearest(intronic) / Very-Strongly-Pan-related <PAN_ABC (alpha; acinar; ductal; PAN_Nasser) / PAN-SMR (Neg_Exp)> / Non_PAN_ABC (Adp; LIV; MuSc; THY; ADR; Brain; SI; Co); Non_PAN_SMR <Pos_Exp (Brain) / Neg_Exp (Adp-Sub; Adp-Vis; LIV; MuSc; THY; ADR; Co; Blood)>] / ACTR2 [Very-Strongly-Pan-related <PAN_ABC (beta; alpha; acinar; ductal; PAN_Nasser)> / Non_PAN_ABC (Adp; LIV; MuSc; THY; ADR; Bra…
EUR-meta-22	2:65595750 - 2:65695750	EAS/EUR	2:65655012:C:G	rs2028150	Primary	SPRED2	intronic	0.11	20	0	0.697	++	0.15	-0.05	0.009	8.02e-09	0.402	-0.054	0.006	1.31e-16	SPRED2;ACTR2;CEP68;RAB1A;SLC1A4	SPRED2	SPRED2 [nearest(intronic) / Very-Strongly-Pan-related <PAN_ABC (beta; alpha; acinar; ductal; PAN_Nasser)> / Non_PAN_ABC (Adp; LIV; MuSc; THY; ADR; Brain; SI; Co)] / ACTR2 [Very-Strongly-Pan-related <PAN_ABC (beta; alpha; acinar; ductal; PAN_Nasser)> / Non_PAN_ABC (Adp; LIV; MuSc; THY; ADR; Brain; Co)] / CEP68 [Pan-related <PAN_ABC (PAN_Nasser)> / Non_PAN_ABC (Adp; LIV; MuSc; THY; ADR; Brain; Co)]…
EAS-meta-17	2:120181070 - 2:120281070	EAS	2:120231070:C:G	rs3731600	Primary	SCTR	exonic	0.95	1	NA	NA	+?	0.033	-0.122	0.02	1.61e-09	NA	NA	NA	NA	SCTR	SCTR	SCTR [nearest(exonic) / rs3731600 [VEP_Medium: R2 (EAS:EUR=1:1)]]
EUR-meta-24	2:121297612 - 2:121397612	EUR	2:121347612:G:C	rs11688682	Primary	LINC01101(+123.9kb)	intergenic	0.66	17	88.9	0.00274	--	0.095	-0.004	0.016	0.782	0.272	-0.058	0.008	2.93e-14	INHBB;LINC01101	LINC01101	INHBB [Non_PAN_SMR <Neg_Exp (Adp-Sub)>] / LINC01101 [nearest(intergenic)]
EAS-meta-18	2:149486710 - 2:149586710	EAS	2:149545981:G:T	rs1055664	Primary	EPC2	downstream	0.19	108	83.3	0.0144	--	0.439	-0.036	0.006	2.52e-09	0.125	-0.008	0.01	0.4	EPC2	EPC2	EPC2 [nearest(downstream) / Pan-related <PAN_ABC (PAN_Nasser)>]
EUR-meta-25	2:158279237 - 2:158379237	EUR	2:158329237:G:A	rs16841827	Primary	CYTIP	intronic	0.15	9	72.1	0.0582	+-	0.011	0.021	0.053	0.688	0.063	-0.082	0.013	6.34e-10	CYTIP;ACVR1C	CYTIP	CYTIP [nearest(intronic) / Non_PAN_ABC (LIV; Co)] / ACVR1C [rs7594480 [VEP_Medium: R2 (EAS:EUR=0.67:0.86)]]
EUR-meta-26	2:161086656 - 2:161186656	EUR	2:161136656:G:A	rs7572970	Primary	RBMS1	intronic	0.17	15	92.4	0.000294	--	0.172	-0.006	0.008	0.45	0.266	-0.045	0.007	6.12e-10	ITGB6;LOC100505984;RBMS1;DAPL1;TANC1	ITGB6	ITGB6 [Strongly-Pan-related <PAN_ABC (acinar; ductal; PAN_Nasser)> / Non_PAN_ABC (SI; Co); Non_PAN_SMR <Pos_Exp (Adp-Sub; Adp-Vis; ADR; Co)>] / LOC100505984 [Strongly-Pan-related <PAN_ABC (acinar; ductal)>] / RBMS1 [nearest(intronic) / Pan-related <PAN_ABC (PAN_Nasser)> / Non_PAN_ABC (Adp; LIV; MuSc; ADR; Brain; SI; Co)] / DAPL1 [Pan-related <PAN_ABC (PAN_Nasser)> / Non_PAN_ABC (MuSc; Brain)] / T…
EAS-meta-19	2:165478876 - 2:165578876	EAS/EUR	2:165381518:A:G	rs75536691	Primary	GRB14	exonic	1	1	NA	NA	+?	0.027	-0.176	0.019	8.86e-20	NA	NA	NA	NA	GRB14	GRB14	GRB14 [nearest(exonic) / rs75536691 [VEP_Medium: R2 (EAS:EUR=1:1)]]
EUR-meta-27	2:165478876 - 2:165578876	EAS/EUR	2:165528876:C:T	rs13389219	Primary	COBLL1	intronic	0.41	4	0	0.89	--	0.092	-0.062	0.011	2.76e-09	0.401	-0.06	0.006	1.17e-20	COBLL1	COBLL1	COBLL1 [nearest(intronic) / Non_PAN_SMR <Pos_Exp (Brain)>]
EUR-meta-28	2:165478876 - 2:165578876	EAS/EUR	2:165573194:C:T	rs13024606	Secondary	COBLL1	intronic	NA	NA	NA	NA	?+	NA	NA	NA	NA	0.046	0.052	0.016	0.000941	COBLL1	COBLL1	COBLL1 [nearest(intronic) / Non_PAN_SMR <Pos_Exp (Brain)>]
EAS-meta-20	2:213637103 - 2:213737103	EAS	2:213687103:T:C	rs75179644	Primary	IKZF2(-177.3kb)	intergenic	0.93	2	0	0.673	+-	0.099	-0.073	0.011	1.08e-10	0.002	0.003	0.181	0.986	IKZF2	IKZF2	IKZF2 [nearest(intergenic)]
EUR-meta-29	2:227058446 - 2:227158446	EUR	2:227101411:G:A	rs2972144	Primary	IRS1(-494.6kb)	intergenic	0.63	23	89.9	0.00162	--	0.076	-0.049	0.012	1.71e-05	0.362	-0.091	0.007	2.19e-43	AC068138.1;IRS1	IRS1	AC068138.1 [Non_PAN_SMR <Neg_Exp (MuSc)>] / IRS1 [nearest(intergenic)]
EAS-meta-21	2:234141103 - 2:234241103	EAS	2:234191103:T:A	rs117809958	Primary	ATG16L1	intronic	0.88	2	0	0.945	++	0.019	0.21	0.025	1.02e-17	0.002	0.198	0.173	0.252	ATG16L1	ATG16L1	ATG16L1 [nearest(intronic)]
EAS-meta-22	2:234141103 - 2:234241103	EAS	2:234305849:T:TGGG	rs567908532	Secondary	DGKD	intronic	NA	NA	NA	NA	-?	0.431	0.053	0.007	1.13e-12	NA	NA	NA	NA	DGKD	DGKD	DGKD [nearest(intronic)]
EAS-meta-23	3:12315308 - 3:12415308	EAS/EUR	3:12385357:C:A	rs3963364	Primary	PPARG	intronic	0.31	28	NA	NA	-?	0.05	-0.111	0.017	6.94e-11	NA	NA	NA	NA	PPARG	PPARG	PPARG [nearest(intronic)]
EUR-meta-31	3:12315308 - 3:12415308	EAS/EUR	3:12488882:C:G	rs4684854	Secondary	PPARG(+13kb)	intergenic	NA	NA	14.9	0.279	++	0.105	-0.018	0.01	0.0809	0.575	-0.031	0.006	1.66e-06	PPARG;TIMP4	PPARG	PPARG [nearest(intergenic)] / TIMP4 [Non_PAN_SMR <Neg_Exp (Adp-Sub; Adp-Vis)>]
EUR-meta-30	3:12315308 - 3:12415308	EAS/EUR	3:12336507:G:A	rs11709077	Primary	PPARG	intronic	0.44	10	0	0.882	--	0.039	-0.107	0.018	1.47e-09	0.126	-0.104	0.01	1.26e-26	PPARG;TIMP4;SYN2;TSEN2	PPARG	PPARG [nearest(intronic) / rs1801282 [VEP_Low: R2 (EAS:EUR=0.99:0.96)] / Pan-related <PAN_ABC (PAN_Nasser)> / Non_PAN_ABC (Adp; LIV; MuSc; THY; ADR; SI; Co)] / TIMP4 [Non_PAN_ABC (Adp; Co); Non_PAN_SMR <Neg_Exp (Adp-Sub; Adp-Vis)>] / SYN2 [Non_PAN_SMR <Neg_Exp (MuSc; Brain)>] / TSEN2 [Non_PAN_ABC (Adp)]
EAS-meta-24	3:23404790 - 3:23504790	EAS/EUR	3:23258614:G:A	rs11926494	Primary	UBE2E2	intronic	0.09	53	55.1	0.136	--	0.18	-0.103	0.008	4.13e-39	0.083	-0.082	0.012	4.44e-12	UBE2E2;UBE2E2-AS1;UBE2E1;UBE2E1-AS1;ZNF385D	UBE2E2	UBE2E2 [nearest(intronic) / Pan-related <PAN_ABC (alpha; PAN_Nasser)> / Non_PAN_ABC (MuSc; Brain; Co); Non_PAN_SMR <Neg_Exp (THY)>] / UBE2E2-AS1 [Pan-related <PAN_ABC (alpha; PAN_Nasser)> / Non_PAN_ABC (MuSc; Brain; Co)] / UBE2E1 [Non_PAN_ABC (MuSc; Brain)] / UBE2E1-AS1 [Non_PAN_ABC (MuSc; Brain)] / ZNF385D [Non_PAN_ABC (MuSc)]
EAS-meta-25	3:23404790 - 3:23504790	EAS/EUR	3:23551971:G:A	rs60410861	Secondary	UBE2E2	intronic	NA	NA	0	0.561	++	0.142	0.101	0.009	4.14e-32	0.035	0.112	0.018	1.56e-10	UBE2E2;MIR548AC;UBE2E1;UBE2E1-AS1;ZNF385D	UBE2E2	UBE2E2 [nearest(intronic) / Non_PAN_ABC (Adp; Brain)] / MIR548AC [Non_PAN_ABC (Adp)] / UBE2E1 [Non_PAN_ABC (Adp; Brain)] / UBE2E1-AS1 [Non_PAN_ABC (Adp; Brain)] / ZNF385D [Non_PAN_ABC (Adp)]
EAS-meta-26	3:23404790 - 3:23504790	EAS/EUR	3:23111190:C:T	rs111232097	Secondary	UBE2E2(-133.3kb)	intergenic	NA	NA	NA	NA	+?	0.016	0.151	0.026	9.24e-09	NA	NA	NA	NA	UBE2E2;UBE2E2-AS1	UBE2E2	UBE2E2 [nearest(intergenic) / Non_PAN_ABC (MuSc); Non_PAN_SMR <Neg_Exp (THY)>] / UBE2E2-AS1 [Non_PAN_ABC (MuSc)]
EAS-meta-27	3:23404790 - 3:23504790	EAS/EUR	3:23585052:T:A	rs113763382	Secondary	UBE2E2	intronic	NA	NA	NA	NA	-?	0.194	-0.108	0.01	1.11e-27	NA	NA	NA	NA	UBE2E2	UBE2E2	UBE2E2 [nearest(intronic)]
EUR-meta-32	3:23404790 - 3:23504790	EAS/EUR	3:23454790:A:G	rs1496653	Primary	UBE2E2	intronic	0.58	3	89.3	0.00226	++	0.181	-0.1	0.008	1.62e-37	0.211	-0.066	0.008	2.49e-17	UBE2E2;UBE2E2-AS1;UBE2E1;UBE2E1-AS1;ZNF385D	UBE2E2	UBE2E2 [nearest(intronic) / Pan-related <PAN_ABC (alpha; PAN_Nasser)> / Non_PAN_ABC (MuSc; Brain; Co); Non_PAN_SMR <Neg_Exp (THY)>] / UBE2E2-AS1 [Pan-related <PAN_ABC (alpha; PAN_Nasser)> / Non_PAN_ABC (MuSc; Brain; Co)] / UBE2E1 [Non_PAN_ABC (MuSc; Brain)] / UBE2E1-AS1 [Non_PAN_ABC (MuSc; Brain)] / ZNF385D [Non_PAN_ABC (MuSc)]
EUR-meta-33	3:23404790 - 3:23504790	EAS/EUR	3:23510044:A:G	rs17013314	Secondary	UBE2E2	intronic	NA	NA	63.7	0.0971	--	0.138	0.087	0.009	9.84e-24	0.033	0.12	0.018	4.17e-11	UBE2E2;MIR548AC;UBE2E1;UBE2E2-AS1;ZNF385D	UBE2E2	UBE2E2 [nearest(intronic) / Non_PAN_ABC (Adp; Brain); Non_PAN_SMR <Neg_Exp (THY)>] / MIR548AC [Non_PAN_ABC (Adp)] / UBE2E1 [Non_PAN_ABC (Adp; Brain)] / UBE2E2-AS1 [Non_PAN_ABC (Adp; Brain)] / ZNF385D [Non_PAN_ABC (Adp)]
EUR-meta-34	3:50124197 - 3:50224197	EUR	3:49980596:C:T	rs4688760	Primary	RBM6	intronic	0.22	92	86.4	0.00679	++	0.288	0.015	0.007	0.0289	0.683	0.042	0.007	2.14e-09	RBM6;FAM212A;MST1R;RNF123;UBA7	RBM6	RBM6 [nearest(intronic) / Pan-related <PAN-SMR (Neg_Exp)> / Non_PAN_SMR <Pos_Exp (Brain; Co) / Neg_Exp (Adp-Sub; Adp-Vis; MuSc; THY; ADR; PIT; SI; Blood)>] / FAM212A [Non_PAN_SMR <Pos_Exp (Blood)>] / MST1R [Non_PAN_SMR <Pos_Exp (Brain)>] / RNF123 [Non_PAN_SMR <Pos_Exp (THY; Brain) / Neg_Exp (Adp-Sub)>] / UBA7 [Non_PAN_SMR <Pos_Exp (Blood)>]
EUR-meta-35	3:52866916 - 3:52966916	EUR	3:53123273:G:A	rs891368	Primary	RFT1	3UTR	0.09	22	87.9	0.004	--	0.24	-0.011	0.007	0.132	0.434	-0.038	0.006	3.25e-09	RFT1;SFMBT1;SERBP1P3;TMEM110;TMEM110-MUSTN1	SFMBT1	RFT1 [nearest(3UTR) / Non_PAN_SMR <Pos_Exp (Adp-Sub; Adp-Vis; MuSc; THY; ADR; PIT; SI; Co) / Neg_Exp (Brain; Blood)>] / SFMBT1 [Very-Strongly-Pan-related <PAN_ABC (beta; alpha; PAN_Nasser)> / Non_PAN_ABC (LIV; SI; Co)] / SERBP1P3 [Pan-related <PAN-SMR (Pos_Exp)> / Non_PAN_SMR <Pos_Exp (Adp-Sub; Adp-Vis; LIV; MuSc; THY; ADR; PIT; SI; Co) / Neg_Exp (Brain; Blood)>] / TMEM110 [NA] / TMEM110-MUSTN1 […
EUR-meta-36	3:54778827 - 3:54878827	EUR	3:54828827:G:T	rs76263492	Primary	CACNA2D3	intronic	0.75	3	NA	NA	?+	NA	NA	NA	NA	0.045	0.09	0.016	8.94e-09	CACNA2D3;CACNA2D3-AS1	CACNA2D3	CACNA2D3 [nearest(intronic)] / CACNA2D3-AS1 [Non_PAN_ABC (MuSc; ADR)]
EAS-meta-28	3:63892188 - 3:63992188	EAS/EUR	3:63942188:C:G	rs28675788	Primary	ATXN7	intronic	0.14	28	0	0.658	++	0.372	-0.075	0.006	2.7e-33	0.128	-0.07	0.01	6.53e-13	THOC7;ATXN7;C3orf14;CADPS;PSMD6-AS2	THOC7	THOC7 [Very-Strongly-Pan-related <PAN_ABC (beta; alpha; acinar; ductal; PAN_Nasser)> / Non_PAN_ABC (Adp; LIV; MuSc; THY; ADR; Brain; SI; Co); Non_PAN_SMR <Neg_Exp (Brain)>] / ATXN7 [nearest(intronic) / Pan-related <PAN_ABC (alpha; PAN_Nasser)> / Non_PAN_ABC (Adp; LIV; MuSc; THY; ADR; Brain; SI; Co); Non_PAN_SMR <Neg_Exp (Blood)>] / C3orf14 [Strongly-Pan-related <PAN_ABC (acinar; ductal; PAN_Nasse…
EUR-meta-37	3:63892188 - 3:63992188	EAS/EUR	3:63974258:T:G	rs3774725	Primary	ATXN7	intronic	0.59	15	0	0.777	++	0.391	-0.069	0.006	1.18e-28	0.151	-0.066	0.009	1.95e-13	ATXN7;C3orf14;CADPS;PSMD6;THOC7	CADPS	ATXN7 [nearest(intronic) / Pan-related <PAN_ABC (alpha; PAN_Nasser)> / Non_PAN_ABC (Adp; LIV; MuSc; THY; ADR; Brain; SI; Co)] / C3orf14 [Strongly-Pan-related <PAN_ABC (acinar; ductal; PAN_Nasser)> / Non_PAN_ABC (Adp; LIV; MuSc; THY; ADR; SI; Co)] / CADPS [Very-Strongly-Pan-related <PAN_ABC (beta; PAN_Nasser)> / Non_PAN_ABC (LIV; ADR; SI)] / PSMD6 [Very-Strongly-Pan-related <PAN_ABC (beta; alpha; …
EUR-meta-38	3:64652275 - 3:64752275	EUR	3:64701387:A:G	rs4368494	Primary	ADAMTS9(+27.7kb)	intergenic	0.2	18	94.8	1.25e-05	--	0.211	0.01	0.007	0.197	0.702	0.054	0.007	1.39e-14	ADAMTS9	ADAMTS9	ADAMTS9 [nearest(intergenic)]
EAS-meta-29	3:84733138 - 3:84833138	EAS	3:84783138:G:A	rs12490891	Primary	CADM2(-225kb)	intergenic	0.16	58	92.7	0.000216	+-	0.394	0.034	0.006	3.11e-08	0.052	-0.024	0.014	0.0995	CADM2	CADM2	CADM2 [nearest(intergenic)]
EAS-meta-30	3:114910798 - 3:115010798	EAS	3:114965391:G:T	rs13326167	Primary	ZBTB20(+99.3kb)	intergenic	0.06	48	0	0.757	--	0.392	-0.044	0.006	1.3e-12	0.889	-0.04	0.01	7.87e-05	ZBTB20-AS4;ZBTB20	ZBTB20-AS4	ZBTB20-AS4 [Pan-related <PAN_ABC (PAN_Nasser)> / Non_PAN_ABC (Adp; LIV; MuSc; THY; ADR; Brain; SI; Co)] / ZBTB20 [nearest(intergenic)]
EAS-meta-31	3:121915199 - 3:122015199	EAS	3:121971296:A:G	rs6438717	Primary	CASR	intronic	0.4	62	NA	NA	+?	0.436	-0.043	0.007	6.61e-09	NA	NA	NA	NA	CASR	CASR	CASR [nearest(intronic)]
EAS-meta-32	3:123015778 - 3:123115778	EAS/EUR	3:123158158:T:C	rs2332541	Primary	ADCY5	intronic	0.44	6	57.1	0.127	+-	0.344	-0.045	0.006	7.91e-12	0.009	0.01	0.035	0.778	ADCY5	ADCY5	ADCY5 [nearest(intronic) / Non_PAN_ABC (Adp)]
EUR-meta-39	3:123015778 - 3:123115778	EAS/EUR	3:123065778:G:A	rs11708067	Primary	ADCY5	intronic	0.12	8	NA	NA	?+	NA	NA	NA	NA	0.775	0.088	0.008	5.05e-30	ADCY5	ADCY5	ADCY5 [nearest(intronic) / Pan-related <PAN_ABC (ductal; PAN_Nasser)> / Non_PAN_ABC (LIV)]
EAS-meta-33	3:124871457 - 3:124971457	EAS/EUR	3:124921920:G:A	rs12497133	Primary	SLC12A8	intronic	0.25	144	NA	NA	+?	0.323	0.041	0.007	5.09e-09	NA	NA	NA	NA	SLC12A8;ZNF148	SLC12A8	SLC12A8 [nearest(intronic)] / ZNF148 [Non_PAN_SMR <Pos_Exp (Blood) / Neg_Exp (THY)>]
EUR-meta-40	3:124871457 - 3:124971457	EAS/EUR	3:124925934:A:G	rs569255	Primary	SLC12A8	intronic	0.69	4	0	0.419	--	0.236	0.032	0.007	1.62e-05	0.461	0.04	0.006	5.64e-10	SLC12A8	SLC12A8	SLC12A8 [nearest(intronic) / Strongly-Pan-related <PAN_ABC (PAN_Nasser) / PAN-SMR (Neg_Exp)> / Non_PAN_ABC (Adp; LIV; THY; Brain; SI; Co); Non_PAN_SMR <Neg_Exp (LIV)>]
EUR-meta-41	3:150016540 - 3:150116540	EUR	3:150066540:T:A	rs62271373	Primary	TSC22D2(-59.6kb)	intergenic	0.99	1	NA	NA	?+	NA	NA	NA	NA	0.055	0.088	0.014	1.03e-09	TSC22D2	TSC22D2	TSC22D2 [nearest(intergenic)]
EAS-meta-34	3:152332636 - 3:152432636	EAS/EUR	3:152387723:C:T	rs9873341	Primary	P2RY1(-165kb)	intergenic	0.04	102	0	0.724	++	0.274	0.038	0.007	1.05e-08	0.296	0.034	0.007	8.74e-07	P2RY1	P2RY1	P2RY1 [nearest(intergenic) / Non_PAN_ABC (Brain)]
EUR-meta-43	3:152332636 - 3:152432636	EAS/EUR	3:152084243:G:A	rs7633673	Secondary	MBNL1	intronic	NA	NA	0	0.35	--	0.436	-0.027	0.006	6.38e-06	0.395	-0.036	0.007	6.23e-08	MBNL1	MBNL1	MBNL1 [nearest(intronic) / Non_PAN_ABC (Brain)]
EUR-meta-42	3:152332636 - 3:152432636	EAS/EUR	3:152456697:G:T	rs78569745	Primary	P2RY1(-96kb)	intergenic	0.07	59	NA	NA	?+	NA	NA	NA	NA	0.958	0.099	0.016	2.34e-09	P2RY1	P2RY1	P2RY1 [nearest(intergenic)]
EUR-meta-44	3:168173132 - 3:168273132	EUR	3:168223132:G:A	rs7642311	Primary	GOLIM4(+409.4kb)	intergenic	0.12	24	NA	NA	?+	NA	NA	NA	NA	0.872	0.054	0.01	1.53e-08	EGFEM1P;GOLIM4;LINC02082	GOLIM4	EGFEM1P [NA] / GOLIM4 [nearest(intergenic)] / LINC02082 [NA]
EAS-meta-35	3:170674883 - 3:170774883	EAS/EUR	3:170686573:A:G	rs9875793	Primary	SLC2A2(-27.6kb)	intergenic	0.08	41	0	0.561	++	0.189	-0.051	0.008	4.02e-11	0.158	-0.058	0.009	4.97e-11	EIF5A2;RPL22L1;SLC2A2;SLC7A14	SLC2A2	EIF5A2 [Non_PAN_ABC (Brain)] / RPL22L1 [Non_PAN_ABC (Brain)] / SLC2A2 [nearest(intergenic)] / SLC7A14 [Non_PAN_ABC (Brain)]
EUR-meta-45	3:170674883 - 3:170774883	EAS/EUR	3:170724883:T:C	rs8192675	Primary	SLC2A2	intronic	0.45	6	81.3	0.0209	++	0.223	-0.043	0.007	3.38e-09	0.288	-0.066	0.007	5.77e-21	SLC2A2;EIF5A2;RPL22L1	SLC2A2	SLC2A2 [nearest(intronic) / rs5398 [VEP_Medium: R2 (EAS:EUR=0.94:0.99)] / Very-Strongly-Pan-related <PAN_ABC (beta)> / Non_PAN_ABC (LIV; Brain; SI; Co)] / EIF5A2 [Non_PAN_SMR <Neg_Exp (Brain; Blood)>] / RPL22L1 [Non_PAN_SMR <Neg_Exp (Blood)>]
EAS-meta-36	3:181103051 - 3:181203051	EAS	3:181153051:C:G	rs79269655	Primary	SOX2(-276.7kb)	intergenic	0.56	44	0	0.621	--	0.022	0.135	0.024	3.75e-08	0	1.466	2.693	0.586	SOX2	SOX2	SOX2 [nearest(intergenic)]
EAS-meta-37	3:185455984 - 3:185555984	EAS/EUR	3:185495320:G:A	rs13092876	Primary	IGF2BP2	intronic	0.06	18	18.5	0.268	++	0.304	0.119	0.007	1.34e-72	0.316	0.108	0.007	6.49e-57	IGF2BP2;C3orf65;SENP2	IGF2BP2	IGF2BP2 [nearest(intronic) / Pan-related <PAN_ABC (ductal; PAN_Nasser)> / Non_PAN_SMR <Pos_Exp (THY)>] / C3orf65 [Pan-related <PAN_ABC (PAN_Nasser)>] / SENP2 [Non_PAN_SMR <Pos_Exp (Brain; Blood)>]
EUR-meta-46	3:185455984 - 3:185555984	EAS/EUR	3:185510613:T:G	rs7633675	Primary	IGF2BP2	intronic	0.03	38	0	0.389	--	0.303	0.117	0.006	8.18e-72	0.316	0.108	0.007	3.21e-57	IGF2BP2;C3orf65	IGF2BP2	IGF2BP2 [nearest(intronic) / Pan-related <PAN_ABC (ductal; PAN_Nasser)> / Non_PAN_SMR <Pos_Exp (THY)>] / C3orf65 [Pan-related <PAN_ABC (PAN_Nasser)>]
EAS-meta-38	3:186615645 - 3:186715645	EAS/EUR	3:186649931:C:CG	3:186649931:C:CG	Primary	ST6GAL1	intronic	0.99	1	NA	NA	-?	0.44	-0.044	0.006	2.77e-12	NA	NA	NA	NA	ST6GAL1;EIF4A2;RFC4;RP11-573D15.2;RPL39L	ST6GAL1	ST6GAL1 [nearest(intronic) / Pan-related <PAN_ABC (ductal; PAN_Nasser)> / Non_PAN_ABC (Adp; LIV; MuSc; THY; Brain; SI)] / EIF4A2 [Non_PAN_ABC (THY; Brain)] / RFC4 [Non_PAN_ABC (MuSc; THY; Brain)] / RP11-573D15.2 [Non_PAN_ABC (Brain)] / RPL39L [Non_PAN_ABC (MuSc; THY; Brain)]
EUR-meta-47	3:186615645 - 3:186715645	EAS/EUR	3:186665645:C:T	rs3887925	Primary	ST6GAL1	intronic	1	1	77.1	0.0365	++	0.458	0.035	0.006	4.09e-09	0.545	0.054	0.006	1.01e-16	ST6GAL1	ST6GAL1	ST6GAL1 [nearest(intronic) / Non_PAN_SMR <Pos_Exp (Blood)>]
EUR-meta-48	3:186615645 - 3:186715645	EAS/EUR	3:186675277:G:A	rs7645517	Secondary	ST6GAL1	intronic	NA	NA	27.6	0.24	++	0.068	0.026	0.012	0.0259	0.057	0.048	0.014	0.000607	ST6GAL1	ST6GAL1	ST6GAL1 [nearest(intronic) / Non_PAN_SMR <Pos_Exp (Blood)>]
EAS-meta-39	3:187690523 - 3:187790523	EAS/EUR	3:187704638:G:A	rs11713391	Primary	LPP(-166.4kb)	intergenic	0.07	38	0	0.424	--	0.183	-0.048	0.008	5.14e-10	0.064	-0.036	0.013	0.00581	LPP;RP11-132N15.3;BCL6;LPP-AS2;RTP4	LPP	LPP [nearest(intergenic) / Non_PAN_ABC (LIV)] / RP11-132N15.3 [Pan-related <PAN_ABC (PAN_Nasser)> / Non_PAN_ABC (MuSc; Brain)] / BCL6 [Non_PAN_ABC (LIV)] / LPP-AS2 [Non_PAN_ABC (LIV)] / RTP4 [Non_PAN_ABC (LIV)]
EUR-meta-49	3:187690523 - 3:187790523	EAS/EUR	3:187740523:C:T	rs6808574	Primary	LPP(-130.5kb)	intergenic	0.33	3	0.4	0.316	--	0.005	-0.002	0.059	0.977	0.388	-0.061	0.007	2.29e-20	LPP	LPP	LPP [nearest(intergenic)]
EAS-meta-40	3:195781237 - 3:195881237	EAS	3:195825077:T:C	rs74289356	Primary	TFRC(+16kb)	intergenic	0.53	10	0	0.897	++	0.372	-0.04	0.006	3.19e-10	0.925	-0.038	0.012	0.00167	TFRC;SDHAP1;LINC00885;TNK2;ZDHHC19	TFRC	TFRC [nearest(intergenic) / Very-Strongly-Pan-related <PAN_ABC (beta; alpha; acinar; ductal; PAN_Nasser)> / Non_PAN_ABC (Adp; LIV; MuSc; THY; ADR; Brain; SI; Co)] / SDHAP1 [Very-Strongly-Pan-related <PAN_ABC (beta; acinar; ductal; PAN_Nasser)> / Non_PAN_ABC (Adp; LIV; MuSc; THY; ADR; Brain; SI; Co)] / LINC00885 [Pan-related <PAN_ABC (PAN_Nasser)> / Non_PAN_ABC (LIV; MuSc; THY; Co)] / TNK2 [Pan-re…
EUR-meta-50	4:688275 - 4:788275	EUR	4:738275:C:T	rs56187241	Primary	PCGF3	intronic	0.11	24	63	0.1	++	0.028	0.061	0.019	0.000987	0.045	0.101	0.016	1.07e-10	PCGF3;ATP5I;MFSD7;MYL5	PCGF3	PCGF3 [nearest(intronic) / Non_PAN_ABC (ADR)] / ATP5I [Non_PAN_ABC (ADR)] / MFSD7 [Non_PAN_ABC (ADR)] / MYL5 [Non_PAN_ABC (ADR)]
EAS-meta-41	4:1196038 - 4:1296038	EAS	4:1246038:A:T	rs72501962	Primary	CTBP1	upstream	0.99	1	0	0.417	++	0.32	-0.09	0.007	9.37e-43	0.041	-0.076	0.017	5.76e-06	CTBP1;CTBP1-AS2;MAEA;SPON2;UVSSA	CTBP1	CTBP1 [nearest(upstream) / Very-Strongly-Pan-related <PAN_ABC (beta; acinar; PAN_Nasser)> / Non_PAN_ABC (LIV; Brain; Co); Non_PAN_SMR <Pos_Exp (Brain)>] / CTBP1-AS2 [Very-Strongly-Pan-related <PAN_ABC (beta; acinar; PAN_Nasser) / PAN-SMR (Pos_Exp)> / Non_PAN_ABC (LIV; Brain; Co); Non_PAN_SMR <Pos_Exp (Adp-Sub; Adp-Vis; LIV; THY; ADR; SI; Co; Blood)>] / MAEA [Pan-related <PAN_ABC (PAN_Nasser)> / N…
EAS-meta-45	4:1196038 - 4:1296038	EAS	4:1288481:T:G	rs79680136	Secondary	MAEA	intronic	NA	NA	0	0.564	++	0.388	-0.078	0.006	3.3e-35	0.027	-0.066	0.021	0.00158	CTBP1;CTBP1-AS2;MAEA;UVSSA;SPON2	CTBP1-AS2	CTBP1 [Very-Strongly-Pan-related <PAN_ABC (beta; alpha; acinar; ductal; PAN_Nasser)> / Non_PAN_ABC (Adp; LIV; MuSc; THY; Brain; SI; Co); Non_PAN_SMR <Pos_Exp (Brain)>] / CTBP1-AS2 [Very-Strongly-Pan-related <PAN_ABC (beta; alpha; acinar; ductal; PAN_Nasser) / PAN-SMR (Pos_Exp)> / Non_PAN_ABC (Adp; LIV; MuSc; THY; Brain; SI; Co); Non_PAN_SMR <Pos_Exp (Adp-Sub; Adp-Vis; LIV; THY; ADR; SI; Co; Blood…
EAS-meta-43	4:1196038 - 4:1296038	EAS	4:1413421:A:T	rs62286764	Secondary	NKX1-1(+13.3kb)	intergenic	NA	NA	95.3	4.26e-06	--	0.353	0.065	0.007	3.34e-19	0.745	0.017	0.007	0.0207	CTBP1-AS2;FAM53A;AC078852.1;CTBP1;NKX1-1	CTBP1-AS2	CTBP1-AS2 [Pan-related <PAN-SMR (Pos_Exp)> / Non_PAN_SMR <Pos_Exp (Adp-Sub; Adp-Vis; LIV; THY; ADR; SI; Co; Blood)>] / FAM53A [Pan-related <PAN-SMR (Neg_Exp)> / Non_PAN_SMR <Pos_Exp (Brain; Blood) / Neg_Exp (Adp-Sub; MuSc; THY; Co)>] / AC078852.1 [Non_PAN_SMR <Neg_Exp (THY)>] / CTBP1 [Non_PAN_SMR <Pos_Exp (Brain)>] / NKX1-1 [nearest(intergenic)]
EAS-meta-44	4:1196038 - 4:1296038	EAS	4:1784403:T:C	rs56337234	Secondary	FGFR3(-10.6kb)	intergenic	NA	NA	7.3	0.299	--	0.283	0.065	0.007	2.04e-18	0.502	0.055	0.007	9.75e-17	FAM53A;FGFR3;TACC3	FGFR3	FAM53A [Pan-related <PAN-SMR (Neg_Exp)> / Non_PAN_SMR <Pos_Exp (Brain; Blood) / Neg_Exp (Adp-Sub; MuSc; THY; Co)>] / FGFR3 [nearest(intergenic) / Non_PAN_ABC (LIV)] / TACC3 [Non_PAN_SMR <Pos_Exp (Co) / Neg_Exp (Adp-Sub; THY)>]
EAS-meta-46	4:1196038 - 4:1296038	EAS	4:1220215:G:C	rs3775104	Secondary	CTBP1	intronic	NA	NA	83.2	0.0148	--	0.057	-0.137	0.017	2.56e-15	0.009	-0.042	0.035	0.226	CTBP1;CTBP1-AS2;RNF212;SPON2;GAK	CTBP1	CTBP1 [nearest(intronic) / Non_PAN_ABC (ADR; Brain); Non_PAN_SMR <Pos_Exp (Brain)>] / CTBP1-AS2 [Pan-related <PAN-SMR (Pos_Exp)> / Non_PAN_ABC (ADR; Brain); Non_PAN_SMR <Pos_Exp (Adp-Sub; Adp-Vis; LIV; THY; ADR; SI; Co; Blood)>] / RNF212 [Pan-related <PAN_ABC (PAN_Nasser)> / Non_PAN_SMR <Pos_Exp (Adp-Vis)>] / SPON2 [Pan-related <PAN_ABC (PAN_Nasser)> / Non_PAN_ABC (LIV; MuSc; ADR; Co); Non_PAN_SM…
EAS-meta-42	4:1196038 - 4:1296038	EAS	4:1685137:T:C	rs798727	Secondary	FAM53A	intronic	NA	NA	93.8	6.33e-05	--	0.139	0.061	0.009	1.35e-10	0.195	0.011	0.008	0.186	FAM53A;PDE6B;SLBP;TACC3;TMEM129	FAM53A	FAM53A [nearest(intronic) / Strongly-Pan-related <PAN_ABC (PAN_Nasser) / PAN-SMR (Neg_Exp)> / Non_PAN_ABC (Adp; LIV; MuSc; THY; ADR; Brain; SI; Co); Non_PAN_SMR <Pos_Exp (Brain; Blood) / Neg_Exp (Adp-Sub; MuSc; THY; Co)>] / PDE6B [Very-Strongly-Pan-related <PAN_ABC (beta; alpha)>] / SLBP [Very-Strongly-Pan-related <PAN_ABC (beta; alpha; acinar; ductal; PAN_Nasser)> / Non_PAN_ABC (Adp; LIV; MuSc; …
EUR-meta-51	4:1734403 - 4:1834403	EUR	4:1784403:T:C	rs56337234	Primary	FGFR3(-10.6kb)	intergenic	0.66	4	7.3	0.299	--	0.283	0.065	0.007	2.04e-18	0.502	0.055	0.007	9.75e-17	FGFR3	FGFR3	FGFR3 [nearest(intergenic) / Non_PAN_ABC (LIV)]
EUR-meta-52	4:3191845 - 4:3291845	EUR	4:3241845:C:T	rs362307	Primary	HTT	3UTR	0.95	1	NA	NA	?+	NA	NA	NA	NA	0.078	0.07	0.012	6.78e-09	HTT;DOK7;MSANTD1	HTT	HTT [nearest(3UTR)] / DOK7 [Pan-related <PAN_ABC (PAN_Nasser)> / Non_PAN_ABC (Brain)] / MSANTD1 [Non_PAN_ABC (Brain)]
EAS-meta-47	4:6245322 - 4:6345322	EAS/EUR	4:6303731:G:A	rs147834269	Primary	WFS1	exonic	0.99	1	NA	NA	-?	0.025	-0.212	0.028	3.63e-14	NA	NA	NA	NA	WFS1;AC116317.1;PPP2R2C	WFS1	WFS1 [nearest(exonic) / rs147834269 [VEP_Medium: R2 (EAS:EUR=1:1)] / Non_PAN_SMR <Pos_Exp (Adp-Sub; MuSc; THY; ADR) / Neg_Exp (Blood)>] / AC116317.1 [Non_PAN_SMR <Neg_Exp (Brain)>] / PPP2R2C [Non_PAN_SMR <Pos_Exp (Brain)>]
EAS-meta-48	4:6245322 - 4:6345322	EAS/EUR	4:6296206:C:CA	rs761269104	Secondary	WFS1	intronic	NA	NA	NA	NA	-?	0.048	-0.104	0.016	6.23e-11	NA	NA	NA	NA	WFS1;AC116317.1;PPP2R2C	WFS1	WFS1 [nearest(intronic) / Non_PAN_SMR <Pos_Exp (Adp-Sub; MuSc; THY; ADR) / Neg_Exp (Blood)>] / AC116317.1 [Non_PAN_SMR <Neg_Exp (Brain)>] / PPP2R2C [Non_PAN_SMR <Pos_Exp (Brain)>]
EAS-meta-49	4:6245322 - 4:6345322	EAS/EUR	4:6302757:T:C	rs144951440	Secondary	WFS1	exonic	NA	NA	NA	NA	+?	0.009	-0.205	0.037	3.78e-08	NA	NA	NA	NA	WFS1;AC116317.1;PPP2R2C	WFS1	WFS1 [nearest(exonic) / rs144951440 [VEP_Medium: R2 (EAS:EUR=1:1)] / Non_PAN_SMR <Pos_Exp (Adp-Sub; MuSc; THY; ADR) / Neg_Exp (Blood)>] / AC116317.1 [Non_PAN_SMR <Neg_Exp (Brain)>] / PPP2R2C [Non_PAN_SMR <Pos_Exp (Brain)>]
EUR-meta-53	4:6245322 - 4:6345322	EAS/EUR	4:6306763:C:G	rs10937721	Primary	WFS1(+1.8kb)	intergenic	0.33	11	0	0.412	++	0.048	-0.099	0.016	6.24e-10	0.411	-0.085	0.007	5.39e-38	WFS1;JAKMIP1;LOC285484;MAN2B2;MRFAP1	WFS1	WFS1 [nearest(intergenic) / rs1046314 [VEP_Medium: R2 (EAS:EUR=0.94:0.88)] / Very-Strongly-Pan-related <PAN_ABC (beta; alpha; acinar; ductal; PAN_Nasser)> / Non_PAN_ABC (Adp; LIV; MuSc; THY; ADR; Brain; SI; Co); Non_PAN_SMR <Pos_Exp (Adp-Sub; Adp-Vis; MuSc; THY; ADR) / Neg_Exp (Brain)>] / JAKMIP1 [Very-Strongly-Pan-related <PAN_ABC (beta; alpha)> / Non_PAN_ABC (LIV)] / LOC285484 [Very-Strongly-Pa…
EUR-meta-54	4:17993209 - 4:18093209	EUR	4:17811914:C:A	rs7667864	Primary	DCAF16	intronic	0.07	31	86.7	0.00613	--	0.488	-0.015	0.006	0.0118	0.284	-0.04	0.007	1.64e-08	DCAF16;LAP3;LCORL;MED28;QDPR	DCAF16	DCAF16 [nearest(intronic) / Very-Strongly-Pan-related <PAN_ABC (beta; alpha; ductal; PAN_Nasser)> / Non_PAN_ABC (Adp; LIV; MuSc; THY; ADR; Brain; SI; Co); Non_PAN_SMR <Pos_Exp (Adp-Sub; Adp-Vis; THY) / Neg_Exp (Brain; Blood)>] / LAP3 [Very-Strongly-Pan-related <PAN_ABC (beta; alpha; acinar; ductal; PAN_Nasser)> / Non_PAN_ABC (Adp; LIV; MuSc; THY; ADR; Brain; SI; Co)] / LCORL [Very-Strongly-Pan-re…
EAS-meta-50	4:45125691 - 4:45225691	EAS/EUR	4:45177546:AC:A	rs767171141	Primary	GNPDA2(+448.9kb)	intergenic	0.19	13	NA	NA	+?	0.288	0.043	0.007	4.84e-11	NA	NA	NA	NA	GNPDA2	GNPDA2	GNPDA2 [nearest(intergenic)]
EUR-meta-55	4:45125691 - 4:45225691	EAS/EUR	4:45175691:C:T	rs13130484	Primary	GNPDA2(+447.1kb)	intergenic	0.25	4	0	0.966	++	0.288	0.043	0.007	6.05e-11	0.43	0.044	0.007	8.49e-11	GNPDA2	GNPDA2	GNPDA2 [nearest(intergenic)]
EAS-meta-51	4:71804281 - 4:71904281	EAS	4:71844118:G:A	rs28599782	Primary	MOB1B	intronic	0.19	22	0	0.579	++	0.207	0.066	0.007	1.72e-18	0.042	0.056	0.016	0.000599	DCK;GRSF1;MOB1B;GC;UTP3	MOB1B	DCK [Very-Strongly-Pan-related <PAN_ABC (beta; alpha)> / Non_PAN_ABC (MuSc; ADR; Brain); Non_PAN_SMR <Pos_Exp (Adp-Sub; THY; Brain)>] / GRSF1 [Very-Strongly-Pan-related <PAN_ABC (beta; alpha)> / Non_PAN_ABC (MuSc; ADR; Brain); Non_PAN_SMR <Pos_Exp (Brain)>] / MOB1B [nearest(intronic) / Very-Strongly-Pan-related <PAN_ABC (beta; alpha; PAN_Nasser)> / Non_PAN_ABC (LIV; MuSc; ADR; Brain; Co); Non_PAN…
EUR-meta-56	4:83528271 - 4:83628271	EUR	4:83578271:G:A	rs12642790	Primary	SCD5	intronic	0.12	27	76.4	0.0394	++	0.387	0.02	0.006	0.00118	0.338	0.039	0.007	6.43e-09	SCD5;TMEM150C;LINC00575	SCD5	SCD5 [nearest(intronic) / rs3733227 [VEP_Low: R2 (EAS:EUR=1:1)] / Very-Strongly-Pan-related <PAN_ABC (beta)>] / TMEM150C [Very-Strongly-Pan-related <PAN_ABC (beta)>] / LINC00575 [Non_PAN_ABC (Brain)]
EAS-meta-52	4:85289618 - 4:85389618	EAS	4:85339618:T:C	rs117624659	Primary	NKX6-1(-73.5kb)	intergenic	0.98	1	0	0.508	++	0.023	-0.204	0.023	2.2e-18	0.046	-0.248	0.063	8.51e-05	NKX6-1	NKX6-1	NKX6-1 [nearest(intergenic)]
EUR-meta-57	4:89690894 - 4:89790894	EUR	4:89740894:G:C	rs1903002	Primary	FAM13A	intronic	0.07	34	91.8	0.000492	--	0.282	-0.003	0.007	0.624	0.494	-0.036	0.006	1.45e-08	FAM13A;DMP1;DSPP;GRID2;NAP1L5	FAM13A	FAM13A [nearest(intronic) / Strongly-Pan-related <PAN_ABC (acinar; PAN_Nasser)> / Non_PAN_ABC (Adp; LIV; MuSc; Brain; SI; Co)] / DMP1 [Non_PAN_ABC (Adp)] / DSPP [Non_PAN_ABC (Adp)] / GRID2 [Non_PAN_ABC (Adp)] / NAP1L5 [Non_PAN_ABC (Adp; LIV; Brain)]
EUR-meta-58	4:95041911 - 4:95141911	EUR	4:95091911:G:A	rs6821438	Primary	SMARCAD1(-36.9kb)	intergenic	0.06	56	95.4	2.79e-06	-+	0.248	-0.004	0.007	0.52	0.534	0.04	0.006	5.1e-10	BMPR1B-AS1;LOC101929210;SMARCAD1;PDLIM5;UNC5C	LOC101929210	BMPR1B-AS1 [Very-Strongly-Pan-related <PAN_ABC (beta; alpha; acinar; ductal)>] / LOC101929210 [Very-Strongly-Pan-related <PAN_ABC (beta; alpha; acinar; ductal)>] / SMARCAD1 [nearest(intergenic) / Pan-related <PAN_ABC (PAN_Nasser)> / Non_PAN_ABC (Adp; LIV; MuSc; THY; ADR; Brain; SI; Co)] / PDLIM5 [Pan-related <PAN_ABC (ductal; PAN_Nasser)> / Non_PAN_ABC (Adp; MuSc; ADR; Brain; Co)] / UNC5C [Pan-re…
EUR-meta-59	4:103850090 - 4:103950090	EUR	4:103900090:T:A	rs10516495	Primary	SLC9B1	intronic	0.15	268	95.2	4.88e-06	+-	0.367	0.001	0.006	0.886	0.313	-0.042	0.007	1.46e-09	BDH2;CISD2;SLC9B1;SLC9B2;UBE2D3	BDH2	BDH2 [Very-Strongly-Pan-related <PAN_ABC (acinar; PAN_Nasser) / PAN-SMR (Neg_Exp)> / Non_PAN_ABC (Adp; LIV; THY; SI; Co); Non_PAN_SMR <Neg_Exp (PIT; Blood)>] / CISD2 [Pan-related <PAN_ABC (PAN_Nasser)> / Non_PAN_ABC (Adp; LIV; SI; Co); Non_PAN_SMR <Neg_Exp (Adp-Sub; Adp-Vis; THY; Co; Blood)>] / SLC9B1 [nearest(intronic) / Pan-related <PAN_ABC (PAN_Nasser)> / Non_PAN_ABC (Adp; LIV; MuSc; THY; ADR;…
EAS-meta-53	4:121703471 - 4:121803471	EAS	4:121754769:T:C	rs2122510	Primary	PRDM5	intronic	0.03	99	82.7	0.0162	--	0.255	0.039	0.007	1.43e-08	0.305	0.015	0.007	0.0258	PRDM5	PRDM5	PRDM5 [nearest(intronic)]
EAS-meta-54	4:153470475 - 4:153570475	EAS/EUR	4:153520279:A:G	rs10011838	Primary	TMEM154(-19.5kb)	intergenic	0.72	5	65.4	0.0892	--	0.495	0.07	0.006	3.86e-31	0.705	0.054	0.007	2.99e-14	FBXW7;MIR4453;TMEM154	TMEM154	FBXW7 [Non_PAN_SMR <Neg_Exp (Blood)>] / MIR4453 [Non_PAN_SMR <Neg_Exp (Blood)>] / TMEM154 [nearest(intergenic)]
EUR-meta-60	4:153470475 - 4:153570475	EAS/EUR	4:153513369:T:A	rs7669833	Primary	TMEM154(-26.4kb)	intergenic	0.41	13	31.5	0.227	--	0.491	-0.068	0.006	4.29e-28	0.295	-0.057	0.007	3.52e-16	FBXW7;MIR4453;TMEM154	TMEM154	FBXW7 [Non_PAN_SMR <Neg_Exp (Blood)>] / MIR4453 [Non_PAN_SMR <Neg_Exp (Blood)>] / TMEM154 [nearest(intergenic)]
EUR-meta-61	4:157602753 - 4:157702753	EUR	4:157652753:C:A	rs28819812	Primary	PDGFC(-28.9kb)	intergenic	0.21	83	84.3	0.0116	--	0.283	-0.015	0.007	0.0313	0.322	-0.04	0.007	4.22e-08	PDGFC;GLRB	PDGFC	PDGFC [nearest(intergenic) / Non_PAN_ABC (MuSc); Non_PAN_SMR <Neg_Exp (Blood)>] / GLRB [Non_PAN_ABC (MuSc)]
EUR-meta-62	4:185663608 - 4:185763608	EUR	4:185718132:A:T	rs745805	Primary	ACSL1	intronic	0.13	39	95.5	2.38e-06	++	0.28	-0.013	0.007	0.0628	0.18	-0.063	0.008	4.52e-14	ACSL1;CENPU;LINC01093;PRIMPOL;RP11-701P16.1	ACSL1	ACSL1 [nearest(intronic) / Pan-related <PAN_ABC (PAN_Nasser)> / Non_PAN_ABC (MuSc; Brain)] / CENPU [Non_PAN_ABC (MuSc)] / LINC01093 [Non_PAN_ABC (MuSc)] / PRIMPOL [Non_PAN_ABC (MuSc)] / RP11-701P16.1 [Non_PAN_ABC (MuSc)]
EAS-meta-55	5:14718092 - 5:14818092	EAS/EUR	5:14768092:C:G	rs6885132	Primary	ANKH	intronic	0.93	4	86.4	0.00671	++	0.441	-0.043	0.006	2.85e-12	0.096	-0.077	0.011	2.49e-12	ANKH	ANKH	ANKH [nearest(intronic) / Non_PAN_ABC (LIV)]
EUR-meta-64	5:14718092 - 5:14818092	EAS/EUR	5:14768092:C:G	rs6885132	Secondary	ANKH	intronic	NA	NA	86.4	0.00671	++	0.441	-0.043	0.006	2.85e-12	0.096	-0.077	0.011	2.49e-12	ANKH	ANKH	ANKH [nearest(intronic) / Non_PAN_ABC (LIV)]
EUR-meta-63	5:14718092 - 5:14818092	EAS/EUR	5:14755919:C:T	rs147581833	Primary	ANKH	intronic	0.98	1	NA	NA	?-	NA	NA	NA	NA	0.006	-0.371	0.049	3.11e-14	ANKH	ANKH	ANKH [nearest(intronic)]
EUR-meta-65	5:14718092 - 5:14818092	EAS/EUR	5:14753745:G:A	rs17250977	Secondary	ANKH	intronic	NA	NA	NA	NA	?-	NA	NA	NA	NA	0.963	-0.118	0.018	3.64e-11	ANKH	ANKH	ANKH [nearest(intronic)]
EUR-meta-66	5:14718092 - 5:14818092	EAS/EUR	5:14516903:C:T	rs115372267	Secondary	TRIO	intronic	NA	NA	NA	NA	?+	NA	NA	NA	NA	0.002	0.245	0.11	0.0256	TRIO	TRIO	TRIO [nearest(intronic)]
EAS-meta-56	5:36210195 - 5:36310195	EAS	5:36260195:C:T	rs74293505	Primary	RANBP3L	intronic	0.24	95	0	0.821	++	0.162	0.052	0.009	3.51e-09	0.001	0.022	0.135	0.872	RANBP3L;LMBRD2;NADK2;SKP2	RANBP3L	RANBP3L [nearest(intronic)] / LMBRD2 [Non_PAN_ABC (LIV)] / NADK2 [Non_PAN_ABC (LIV; Brain)] / SKP2 [Non_PAN_ABC (LIV)]
EUR-meta-67	5:44637188 - 5:44737188	EUR	5:44682589:A:G	rs6884702	Primary	MRPS30(-126.4kb)	intergenic	0.04	71	84.3	0.0117	--	0.5	0.018	0.006	0.00359	0.394	0.04	0.006	7.92e-10	MRPS30;BRCAT54;NNT;NNT-AS1;PAIP1	MRPS30	MRPS30 [nearest(intergenic) / Very-Strongly-Pan-related <PAN_ABC (beta; alpha)> / Non_PAN_ABC (MuSc; ADR; Brain; SI); Non_PAN_SMR <Pos_Exp (Blood)>] / BRCAT54 [Very-Strongly-Pan-related <PAN_ABC (beta; alpha)>] / NNT [Non_PAN_ABC (ADR; SI)] / NNT-AS1 [Non_PAN_ABC (ADR; SI)] / PAIP1 [Non_PAN_ABC (ADR; SI)]
EAS-meta-57	5:49586753 - 5:49686753	EAS	5:50079603:A:C	rs74334916	Primary	PARP8	intronic	0.22	67	0	0.734	--	0.074	0.064	0.012	3.56e-08	0	0.201	0.403	0.618	PARP8	PARP8	PARP8 [nearest(intronic) / Non_PAN_SMR <Pos_Exp (Blood)>]
EAS-meta-58	5:51741225 - 5:51841225	EAS/EUR	5:51751574:A:T	rs12109081	Primary	ITGA1(-332.2kb)	intergenic	0.26	42	56.4	0.13	--	0.354	0.036	0.006	1.92e-08	0.484	0.022	0.006	0.00048	ISL1;LOC642366;NDUFS4;PELO;ITGA1	ISL1	ISL1 [Very-Strongly-Pan-related <PAN_ABC (beta; alpha)>] / LOC642366 [Very-Strongly-Pan-related <PAN_ABC (beta; alpha)>] / NDUFS4 [Very-Strongly-Pan-related <PAN_ABC (beta)>] / PELO [Very-Strongly-Pan-related <PAN_ABC (beta)>] / ITGA1 [nearest(intergenic)]
EUR-meta-68	5:51741225 - 5:51841225	EAS/EUR	5:52100489:A:G	rs3811978	Primary	ITGA1	intronic	0.15	32	88.1	0.00369	--	0.144	0.014	0.009	0.0902	0.166	0.049	0.009	6.58e-09	ITGA1;PELO;ARL15;ISL1;PARP8	ITGA1	ITGA1 [nearest(intronic) / Pan-related <PAN_ABC (PAN_Nasser)> / Non_PAN_ABC (LIV; MuSc; Brain; SI; Co)] / PELO [Pan-related <PAN_ABC (PAN_Nasser)> / Non_PAN_ABC (LIV; MuSc; Brain; SI; Co)] / ARL15 [Non_PAN_ABC (MuSc; Brain)] / ISL1 [Non_PAN_ABC (MuSc; Brain; SI; Co)] / PARP8 [Non_PAN_ABC (MuSc; Brain; Co)]
EUR-meta-70	5:53221420 - 5:53321420	EUR	5:53412620:C:A	rs279744	Secondary	ARL15	intronic	NA	NA	89.6	0.00194	--	0.294	-0.006	0.007	0.361	0.31	-0.036	0.007	2.58e-07	ARL15	ARL15	ARL15 [nearest(intronic)]
EUR-meta-69	5:53221420 - 5:53321420	EUR	5:53271420:A:G	rs702634	Primary	ARL15	intronic	0.02	40	0	0.586	++	0.147	-0.044	0.009	2.76e-07	0.311	-0.05	0.007	3.36e-13	ARL15	ARL15	ARL15 [nearest(intronic)]
EAS-meta-59	5:55759138 - 5:55859138	EAS/EUR	5:55809138:C:A	rs256903	Primary	ANKRD55(+280kb)	intergenic	0.36	7	0	0.564	++	0.497	0.069	0.006	7.6e-31	0.743	0.074	0.007	8.41e-23	AC022431.2;ANKRD55;CTC-236F12.4;LINC01948;MAP3K1	ANKRD55	AC022431.2 [Non_PAN_ABC (Adp; SI)] / ANKRD55 [nearest(intergenic)] / CTC-236F12.4 [Non_PAN_ABC (Adp; SI)] / LINC01948 [Non_PAN_SMR <Pos_Exp (Brain)>] / MAP3K1 [Non_PAN_ABC (Adp; SI)]
EAS-meta-60	5:55759138 - 5:55859138	EAS/EUR	5:55857025:G:GT	rs11429307	Secondary	MAP3K1(-254.4kb)	intergenic	NA	NA	NA	NA	-?	0.103	0.051	0.01	1.24e-07	NA	NA	NA	NA	LINC01948;MAP3K1	MAP3K1	LINC01948 [Non_PAN_SMR <Pos_Exp (Brain)>] / MAP3K1 [nearest(intergenic)]
EUR-meta-72	5:55759138 - 5:55859138	EAS/EUR	5:55861894:G:A	rs9687846	Secondary	MAP3K1(-249.5kb)	intergenic	NA	NA	58.4	0.121	++	0.104	0.051	0.01	1.89e-07	0.19	0.07	0.008	3.47e-18	AC022431.2;MAP3K1	MAP3K1	AC022431.2 [Non_PAN_ABC (Adp)] / MAP3K1 [nearest(intergenic)]
EUR-meta-71	5:55759138 - 5:55859138	EAS/EUR	5:55806751:A:G	rs459193	Primary	ANKRD55(+277.6kb)	intergenic	0.73	7	0	0.686	--	0.498	0.068	0.006	1.19e-30	0.741	0.072	0.007	6.78e-23	AC022431.2;ANKRD55;CTC-236F12.4;MAP3K1	ANKRD55	AC022431.2 [Non_PAN_ABC (Adp; SI)] / ANKRD55 [nearest(intergenic)] / CTC-236F12.4 [Non_PAN_ABC (Adp; SI)] / MAP3K1 [Non_PAN_ABC (Adp; SI)]
EAS-meta-61	5:67664246 - 5:67764246	EAS	5:67673635:A:G	rs256498	Primary	PIK3R1(+76kb)	intergenic	0.32	14	76.7	0.0385	--	0.406	0.036	0.006	9.09e-09	0.274	0.016	0.007	0.0249	PIK3R1	PIK3R1	PIK3R1 [nearest(intergenic) / Pan-related <PAN_ABC (PAN_Nasser)> / Non_PAN_ABC (SI; Co)]
EAS-meta-62	5:74876778 - 5:74976778	EAS/EUR	5:74887614:T:C	rs767676	Primary	POLK	intronic	0.04	64	0	0.863	++	0.34	-0.038	0.006	4.23e-09	0.233	-0.036	0.007	2.04e-06	POLK;COL4A3BP;HMGCR;CTC-419K13.1;F2R	POLK	POLK [nearest(intronic) / Strongly-Pan-related <PAN_ABC (PAN_Nasser) / PAN-SMR (Neg_Exp)> / Non_PAN_ABC (Adp; LIV; MuSc; THY; ADR); Non_PAN_SMR <Neg_Exp (Brain)>] / COL4A3BP [Pan-related <PAN_ABC (PAN_Nasser)> / Non_PAN_ABC (Adp; LIV; MuSc; THY; ADR)] / HMGCR [Non_PAN_ABC (Adp; MuSc); Non_PAN_SMR <Neg_Exp (Blood)>] / CTC-419K13.1 [Non_PAN_ABC (Adp)] / F2R [Non_PAN_ABC (Adp; MuSc)]
EUR-meta-73	5:74876778 - 5:74976778	EAS/EUR	5:75003678:C:T	rs2307111	Primary	POC5	5UTR	1	1	94.7	1.42e-05	++	0.435	0.012	0.006	0.0419	0.604	0.05	0.006	1.05e-14	POC5;ANKDD1B	POC5	POC5 [nearest(5UTR) / Pan-related <PAN-SMR (Neg_Exp)> / Non_PAN_SMR <Neg_Exp (Adp-Sub; Adp-Vis; THY; SI; Co; Blood)>] / ANKDD1B [Non_PAN_SMR <Neg_Exp (THY)>]
EUR-meta-74	5:76377311 - 5:76477311	EUR	5:76435004:A:G	rs7732130	Primary	ZBED3(+51.9kb)	intergenic	0.51	4	0	0.878	--	0.038	0.063	0.017	0.00017	0.301	0.061	0.007	5.69e-18	ZBED3;ZBED3-AS1	ZBED3	ZBED3 [nearest(intergenic) / Non_PAN_ABC (Adp)] / ZBED3-AS1 [Non_PAN_ABC (Adp)]
EUR-meta-75	5:78482658 - 5:78582658	EUR	5:78430607:C:A	rs1316776	Primary	DMGDH	intronic	0.02	79	75.4	0.0438	--	0.42	-0.025	0.006	5.05e-05	0.352	-0.043	0.007	1.04e-10	JMY;AP3B1;DMGDH;PAPD4;SERINC5	JMY	JMY [rs3733893 [VEP_Medium: R2 (EAS:EUR=0.64:0.87)] / Very-Strongly-Pan-related <PAN_ABC (beta; alpha; PAN_Nasser)> / Non_PAN_ABC (Adp; LIV; MuSc; THY; ADR; Brain; SI; Co); Non_PAN_SMR <Neg_Exp (Blood)>] / AP3B1 [Very-Strongly-Pan-related <PAN_ABC (beta; PAN_Nasser)> / Non_PAN_ABC (MuSc; Brain; Co)] / DMGDH [nearest(intronic) / Non_PAN_ABC (Adp; LIV; MuSc; THY; ADR; Co); Non_PAN_SMR <Neg_Exp (Bra…
EAS-meta-63	5:87920352 - 5:88020352	EAS	5:87970352:G:C	rs112862634	Primary	MEF2C(-43.6kb)	intergenic	0.12	23	0	0.754	++	0.49	0.034	0.006	2.35e-08	0.131	0.037	0.009	7.89e-05	TMEM161B;TMEM161B-AS1;CCNH;MEF2C;RASA1	TMEM161B	TMEM161B [Pan-related <PAN_ABC (PAN_Nasser)> / Non_PAN_ABC (Adp; LIV; ADR; Brain)] / TMEM161B-AS1 [Pan-related <PAN_ABC (PAN_Nasser)> / Non_PAN_ABC (Adp; LIV; ADR; Brain)] / CCNH [Non_PAN_ABC (LIV; ADR; Brain)] / MEF2C [nearest(intergenic)] / RASA1 [Non_PAN_ABC (ADR; Brain)]
EAS-meta-64	5:95800250 - 5:95900250	EAS	5:95848503:A:C	rs6556925	Primary	CAST(-12.5kb)	intergenic	0.06	25	87.5	0.00473	--	0.415	0.037	0.006	5.8e-10	0.622	0.012	0.007	0.0666	CAST	CAST	CAST [nearest(intergenic)]
EUR-meta-76	5:102372968 - 5:102472968	EUR	5:102422968:C:T	rs115505614	Primary	GIN1	3UTR	0.43	3	NA	NA	?+	NA	NA	NA	NA	0.05	0.166	0.015	7.58e-29	GIN1;PAM;PPIP5K2;EIF3KP1	GIN1	GIN1 [nearest(3UTR) / Non_PAN_SMR <Pos_Exp (Brain; Blood)>] / PAM [rs35658696 [VEP_Medium: R2 (EAS:EUR=ND:0.97)] / Non_PAN_SMR <Pos_Exp (Blood)>] / PPIP5K2 [rs36046591 [VEP_Low: R2 (EAS:EUR=ND:0.97)] / Non_PAN_SMR <Pos_Exp (Adp-Sub; THY; ADR; Brain; PIT; Co; Blood)>] / EIF3KP1 [Non_PAN_SMR <Pos_Exp (Adp-Sub; Adp-Vis; MuSc; ADR; Brain; PIT) / Neg_Exp (THY); Both_Exp (Co)>]
EUR-meta-77	5:102372968 - 5:102472968	EUR	5:102338739:G:C	rs78408340	Secondary	PAM	5UTR	NA	NA	NA	NA	?-	NA	NA	NA	NA	0.992	-0.379	0.039	2.35e-22	PAM;EIF3KP1;GIN1;PPIP5K2	PAM	PAM [nearest(5UTR) / rs78408340 [VEP_Medium: R2 (EAS:EUR=1:1)] / Non_PAN_SMR <Pos_Exp (THY; Blood)>] / EIF3KP1 [Non_PAN_SMR <Pos_Exp (Adp-Sub; Adp-Vis; MuSc; ADR; Brain; PIT) / Neg_Exp (THY); Both_Exp (Co)>] / GIN1 [Non_PAN_SMR <Pos_Exp (Brain; Blood)>] / PPIP5K2 [Non_PAN_SMR <Pos_Exp (Adp-Sub; THY; ADR; Brain; PIT; Co; Blood)>]
EAS-meta-65	5:122632334 - 5:122732334	EAS	5:122650885:T:C	rs144052331	Primary	CEP120(-29.7kb)	intergenic	0.15	27	0	0.806	++	0.091	-0.071	0.011	8.73e-11	0.041	-0.066	0.018	0.000196	CEP120;CSNK1G3;PPIC;SNX24;SRFBP1	SRFBP1	CEP120 [nearest(intergenic) / rs2303720 [VEP_Medium: R2 (EAS:EUR=1:0.79)] / Pan-related <PAN_ABC (PAN_Nasser)> / Non_PAN_ABC (Adp; LIV; MuSc; THY; ADR; Brain; SI; Co)] / CSNK1G3 [Very-Strongly-Pan-related <PAN_ABC (beta; alpha; acinar; ductal; PAN_Nasser)> / Non_PAN_ABC (Adp; Co)] / PPIC [Very-Strongly-Pan-related <PAN_ABC (beta; acinar; ductal; PAN_Nasser)> / Non_PAN_ABC (Adp; LIV; MuSc; ADR; Br…
EAS-meta-66	5:133814599 - 5:133914599	EAS/EUR	5:133864599:G:A	rs329122	Primary	JADE2	intronic	0.27	10	0	0.894	++	0.387	0.038	0.006	9.43e-10	0.429	0.037	0.006	1.72e-08	CAMLG;CDKN2AIPNL;JADE2;UBE2B;SLC25A48	CDKN2AIPNL	CAMLG [Pan-related <PAN_ABC (alpha; PAN_Nasser)> / Non_PAN_ABC (LIV; MuSc; THY; ADR; Brain; Co); Non_PAN_SMR <Pos_Exp (Adp-Sub; THY; Brain; Blood)>] / CDKN2AIPNL [Very-Strongly-Pan-related <PAN_ABC (beta; alpha; PAN_Nasser)> / Non_PAN_ABC (Adp; LIV; MuSc; THY; ADR; Brain; SI; Co)] / JADE2 [nearest(intronic) / Pan-related <PAN_ABC (PAN_Nasser)> / Non_PAN_ABC (Adp; LIV; MuSc; THY; ADR; Brain; SI; C…
EUR-meta-78	5:133814599 - 5:133914599	EAS/EUR	5:133864599:G:A	rs329122	Primary	JADE2	intronic	0.47	4	0	0.894	++	0.387	0.038	0.006	9.43e-10	0.429	0.037	0.006	1.72e-08	CDKN2AIPNL;JADE2;UBE2B;SLC25A48;TGFBI	CDKN2AIPNL	CDKN2AIPNL [Very-Strongly-Pan-related <PAN_ABC (beta; alpha; PAN_Nasser)> / Non_PAN_ABC (Adp; LIV; MuSc; THY; ADR; Brain; SI; Co)] / JADE2 [nearest(intronic) / Pan-related <PAN_ABC (PAN_Nasser)> / Non_PAN_ABC (Adp; LIV; MuSc; THY; ADR; Brain; SI; Co)] / UBE2B [Very-Strongly-Pan-related <PAN_ABC (beta; alpha; PAN_Nasser)> / Non_PAN_ABC (Adp; LIV; MuSc; THY; ADR; Brain; SI; Co)] / SLC25A48 [Pan-rel…
EAS-meta-67	5:176676635 - 5:176776635	EAS	5:176513896:C:A	rs3135911	Primary	FGFR4	5UTR	0.84	5	NA	NA	+?	0.432	0.048	0.007	1.02e-12	NA	NA	NA	NA	FGFR4;PRELID1;RAB24;MXD3;NSD1	FGFR4	FGFR4 [nearest(5UTR) / rs351855 [VEP_Medium: R2 (EAS:EUR=0.87:0.95)] / Pan-related <PAN_ABC (ductal; PAN_Nasser)> / Non_PAN_ABC (Adp; LIV; MuSc; THY; ADR; Brain; SI; Co); Non_PAN_SMR <Pos_Exp (THY)>] / PRELID1 [Strongly-Pan-related <PAN_ABC (acinar)> / Non_PAN_ABC (Co); Non_PAN_SMR <Pos_Exp (Blood) / Neg_Exp (LIV; THY; SI; Co)>] / RAB24 [Strongly-Pan-related <PAN_ABC (acinar)> / Non_PAN_ABC (Co);…
EAS-meta-68	6:7181843 - 6:7281843	EAS/EUR	6:7231843:G:A	rs9379084	Primary	RREB1	exonic	0.95	1	84.4	0.0114	--	0.193	-0.065	0.009	1.59e-14	0.112	-0.099	0.011	5.48e-21	RREB1	RREB1	RREB1 [nearest(exonic) / rs9379084 [VEP_Medium: R2 (EAS:EUR=1:1)]]
EUR-meta-79	6:7181843 - 6:7281843	EAS/EUR	6:7231843:G:A	rs9379084	Primary	RREB1	exonic	0.81	3	84.4	0.0114	--	0.193	-0.065	0.009	1.59e-14	0.112	-0.099	0.011	5.48e-21	RREB1;SSR1	RREB1	RREB1 [nearest(exonic) / rs9379084 [VEP_Medium: R2 (EAS:EUR=1:1)]] / SSR1 [Non_PAN_SMR <Neg_Exp (THY)>]
EUR-meta-80	6:7181843 - 6:7281843	EAS/EUR	6:7196323:G:T	rs77630070	Secondary	RREB1	intronic	NA	NA	40.8	0.194	--	0.03	-0.015	0.018	0.396	0.19	-0.04	0.008	1.04e-06	RREB1;SSR1;CAGE1;RIOK1;SNRNP48	RREB1	RREB1 [nearest(intronic) / Pan-related <PAN_ABC (PAN_Nasser)> / Non_PAN_ABC (Adp; THY; Brain; Co)] / SSR1 [Pan-related <PAN_ABC (PAN_Nasser)> / Non_PAN_ABC (MuSc; Co); Non_PAN_SMR <Neg_Exp (THY)>] / CAGE1 [Pan-related <PAN_ABC (PAN_Nasser)> / Non_PAN_ABC (MuSc; Co)] / RIOK1 [Pan-related <PAN_ABC (PAN_Nasser)> / Non_PAN_ABC (MuSc; Co)] / SNRNP48 [Pan-related <PAN_ABC (PAN_Nasser)> / Non_PAN_ABC (M…
EAS-meta-69	6:20636996 - 6:20736996	EAS/EUR	6:20685486:T:C	rs9356744	Primary	CDKAL1	intronic	0.14	7	97.4	4.04e-10	--	0.411	0.178	0.006	2.33e-191	0.313	0.122	0.007	2.11e-71	CDKAL1	CDKAL1	CDKAL1 [nearest(intronic) / Non_PAN_SMR <Pos_Exp (Brain)>]
EAS-meta-75	6:20636996 - 6:20736996	EAS/EUR	6:19831560:G:A	rs6922714	Secondary	ID4(-6.1kb)	intergenic	NA	NA	70.1	0.0673	++	0.027	0.042	0.022	0.0513	0.309	0	0.007	0.943	ID4	ID4	ID4 [nearest(intergenic)]
EAS-meta-74	6:20636996 - 6:20736996	EAS/EUR	6:20323620:C:G	rs6456338	Secondary	E2F3(-78.8kb)	intergenic	NA	NA	0	0.443	++	0.451	-0.013	0.006	0.0365	0.743	-0.005	0.007	0.461	CDKAL1;E2F3	E2F3	CDKAL1 [Non_PAN_ABC (SI)] / E2F3 [nearest(intergenic)]
EAS-meta-70	6:20636996 - 6:20736996	EAS/EUR	6:20537845:CA:C	rs543824204	Secondary	CDKAL1	intronic	NA	NA	NA	NA	+?	0.286	-0.101	0.008	1.45e-37	NA	NA	NA	NA	CDKAL1	CDKAL1	CDKAL1 [nearest(intronic)]
EAS-meta-71	6:20636996 - 6:20736996	EAS/EUR	6:20653849:A:AT	rs140223481	Secondary	CDKAL1	intronic	NA	NA	NA	NA	-?	0.319	0.184	0.008	4.12e-118	NA	NA	NA	NA	CDKAL1	CDKAL1	CDKAL1 [nearest(intronic) / Non_PAN_SMR <Pos_Exp (Brain)>]
EAS-meta-72	6:20636996 - 6:20736996	EAS/EUR	6:20164405:T:TAC	rs35199956	Secondary	MBOAT1	intronic	NA	NA	NA	NA	+?	0.466	-0.013	0.007	0.0658	NA	NA	NA	NA	MBOAT1	MBOAT1	MBOAT1 [nearest(intronic)]
EAS-meta-73	6:20636996 - 6:20736996	EAS/EUR	6:20663463:G:GTT	rs34470647	Secondary	CDKAL1	intronic	NA	NA	NA	NA	-?	0.414	0.161	0.006	4.12e-157	NA	NA	NA	NA	CDKAL1	CDKAL1	CDKAL1 [nearest(intronic) / Non_PAN_SMR <Pos_Exp (Brain)>]
EUR-meta-81	6:20636996 - 6:20736996	EAS/EUR	6:20686996:C:A	rs9368222	Primary	CDKAL1	intronic	0.2	5	94.7	1.53e-05	++	0.41	0.178	0.006	5.89e-191	0.272	0.138	0.007	1.42e-83	CDKAL1	CDKAL1	CDKAL1 [nearest(intronic)]
EAS-meta-76	6:38177353 - 6:38277353	EAS	6:38227353:A:C	rs28472716	Primary	BTBD9	intronic	0.55	81	0	0.71	++	0.409	-0.036	0.006	3.89e-08	0.008	-0.068	0.087	0.434	BTBD9	BTBD9	BTBD9 [nearest(intronic)]
EAS-meta-77	6:38989140 - 6:39089140	EAS	6:39048060:C:T	rs9366994	Primary	GLP1R	intronic	0.64	5	95.6	1.87e-06	--	0.282	-0.069	0.007	2.07e-23	0.107	-0.01	0.01	0.354	GLP1R;KCNK17	GLP1R	GLP1R [nearest(intronic) / Pan-related <PAN-SMR (Pos_Exp)>] / KCNK17 [Pan-related <PAN-SMR (Pos_Exp)> / Non_PAN_SMR <Pos_Exp (Adp-Sub; SI; Blood)>]
EAS-meta-78	6:38989140 - 6:39089140	EAS	6:39284857:G:A	rs35099099	Secondary	KCNK16	intronic	NA	NA	89.5	0.00208	++	0.416	0.053	0.006	4.99e-18	0.492	0.026	0.006	4.3e-05	KCNK16;KCNK17;GLP1R	KCNK16	KCNK16 [nearest(intronic) / rs11756091 [VEP_Medium: R2 (EAS:EUR=1:0.99)] / Very-Strongly-Pan-related <PAN_ABC (beta; alpha)>] / KCNK17 [rs10947804 [VEP_Low: R2 (EAS:EUR=0.99:0.98)] / Very-Strongly-Pan-related <PAN_ABC (beta; alpha) / PAN-SMR (Pos_Exp)> / Non_PAN_ABC (LIV; THY); Non_PAN_SMR <Pos_Exp (Adp-Sub; SI; Blood)>] / GLP1R [Pan-related <PAN-SMR (Pos_Exp)>]
EUR-meta-82	6:40359243 - 6:40459243	EUR	6:40409243:T:C	rs34298980	Primary	LRFN2	intronic	0.85	8	41.6	0.191	++	0.4	-0.025	0.007	0.00016	0.501	-0.038	0.007	1.55e-08	LRFN2	LRFN2	LRFN2 [nearest(intronic)]
EUR-meta-84	6:43765364 - 6:43865364	EUR	6:43760327:G:C	rs11967262	Secondary	VEGFA(+6.1kb)	intergenic	NA	NA	78.6	0.0308	--	0.447	-0.018	0.006	0.00278	0.514	-0.038	0.006	5.78e-09	VEGFA	VEGFA	VEGFA [nearest(intergenic) / Non_PAN_ABC (Adp)]
EUR-meta-83	6:43765364 - 6:43865364	EUR	6:43815364:A:G	rs6937438	Primary	VEGFA(+61.1kb)	intergenic	0.47	12	57	0.127	--	0.119	0.033	0.01	0.00041	0.289	0.051	0.007	2.35e-13	VEGFA	VEGFA	VEGFA [nearest(intergenic) / Non_PAN_ABC (THY)]
EAS-meta-79	6:50738778 - 6:50838778	EAS/EUR	6:50787459:G:T	rs62405419	Primary	TFAP2B	intronic	0.81	3	49.9	0.158	++	0.26	0.047	0.007	6.15e-12	0.114	0.064	0.01	1.8e-10	TFAP2B	TFAP2B	TFAP2B [nearest(intronic) / Non_PAN_ABC (LIV; Brain)]
EUR-meta-85	6:50738778 - 6:50838778	EAS/EUR	6:50788778:A:C	rs3798519	Primary	TFAP2B	intronic	0.3	23	54.5	0.138	--	0.263	0.046	0.007	1.67e-11	0.189	0.062	0.008	4.6e-14	TFAP2B	TFAP2B	TFAP2B [nearest(intronic) / Non_PAN_ABC (LIV; Brain)]
EUR-meta-86	6:107379304 - 6:107479304	EUR	6:107433400:A:T	rs1665901	Primary	BEND3	intronic	0.09	15	27.8	0.239	++	0.363	-0.028	0.007	3.47e-05	0.342	-0.04	0.007	4.97e-09	BEND3;C6orf203;LOC100422737;PDSS2;QRSL1	C6orf203	BEND3 [nearest(intronic) / Pan-related <PAN_ABC (PAN_Nasser)> / Non_PAN_ABC (Adp; LIV; MuSc; THY; ADR; Brain; SI; Co)] / C6orf203 [Very-Strongly-Pan-related <PAN_ABC (beta; alpha; acinar; PAN_Nasser)> / Non_PAN_ABC (LIV; MuSc; Brain)] / LOC100422737 [Very-Strongly-Pan-related <PAN_ABC (beta; alpha)>] / PDSS2 [Very-Strongly-Pan-related <PAN_ABC (beta; alpha; acinar)> / Non_PAN_ABC (LIV; Brain)] / …
EAS-meta-80	6:117946631 - 6:118046631	EAS	6:117996631:T:C	rs80196932	Primary	NUS1	upstream	0.61	3	34.7	0.216	++	0.209	-0.057	0.007	3.7e-14	0.153	-0.043	0.009	1.6e-06	NUS1;GOPC;LOC101927919;ROS1;VGLL2	NUS1	NUS1 [nearest(upstream) / Very-Strongly-Pan-related <PAN_ABC (beta; alpha; acinar; ductal; PAN_Nasser) / PAN-SMR (Neg_Exp)> / Non_PAN_ABC (Adp; LIV; MuSc; THY; ADR; Brain; SI; Co)] / GOPC [Very-Strongly-Pan-related <PAN_ABC (beta; alpha; ductal; PAN_Nasser)> / Non_PAN_ABC (Adp; LIV; MuSc; THY; ADR; Co)] / LOC101927919 [Very-Strongly-Pan-related <PAN_ABC (beta; alpha; acinar; ductal)>] / ROS1 [Pan…
EAS-meta-81	6:126742095 - 6:126842095	EAS/EUR	6:126792095:A:G	rs11759026	Primary	CENPW(+122.1kb)	intergenic	0.99	1	54.4	0.139	--	0.477	0.051	0.006	4.49e-15	0.232	0.066	0.007	2.04e-18	CENPW	CENPW	CENPW [nearest(intergenic)]
EUR-meta-87	6:126742095 - 6:126842095	EAS/EUR	6:126792095:A:G	rs11759026	Primary	CENPW(+122.1kb)	intergenic	1	1	54.4	0.139	--	0.477	0.051	0.006	4.49e-15	0.232	0.066	0.007	2.04e-18	CENPW	CENPW	CENPW [nearest(intergenic) / Non_PAN_SMR <Pos_Exp (Adp-Sub; Brain) / Neg_Exp (Blood)>]
EAS-meta-82	6:131864564 - 6:131964564	EAS	6:131954797:T:G	rs7739842	Primary	ENPP3	intronic	0.26	23	66.1	0.0857	--	0.36	0.048	0.006	3.28e-14	0.197	0.03	0.008	0.000155	MED23;ENPP3;ARG1	MED23	MED23 [Very-Strongly-Pan-related <PAN_ABC (beta)> / Non_PAN_ABC (LIV; Brain); Non_PAN_SMR <Pos_Exp (MuSc; Blood)>] / ENPP3 [nearest(intronic) / Non_PAN_ABC (SI)] / ARG1 [Non_PAN_SMR <Pos_Exp (Blood)>]
EAS-meta-83	6:137243227 - 6:137343227	EAS/EUR	6:137294771:TA:T	rs35389258	Primary	IL20RA(-26.3kb)	intergenic	0.06	30	NA	NA	+?	0.468	0.05	0.006	9.01e-17	NA	NA	NA	NA	IL20RA	IL20RA	IL20RA [nearest(intergenic)]
EUR-meta-88	6:137243227 - 6:137343227	EAS/EUR	6:137302159:G:T	rs1573090	Primary	IL20RA(-18.9kb)	intergenic	0.1	28	0	0.764	++	0.476	0.048	0.006	3.83e-15	0.533	0.046	0.006	1.72e-12	IL20RA	IL20RA	IL20RA [nearest(intergenic)]
EAS-meta-84	6:139158733 - 6:139258733	EAS	6:139259142:C:CT	rs34900381	Primary	REPS1	intronic	0.38	40	NA	NA	-?	0.35	-0.042	0.007	2.8e-08	NA	NA	NA	NA	REPS1;AL121834.1;ECT2L	REPS1	REPS1 [nearest(intronic)] / AL121834.1 [Non_PAN_SMR <Neg_Exp (Brain)>] / ECT2L [Non_PAN_SMR <Pos_Exp (Blood)>]
EAS-meta-85	6:143008692 - 6:143108692	EAS	6:143058692:G:C	rs6570526	Primary	HIVEP2(-13.9kb)	intergenic	0.09	12	0	0.518	--	0.346	-0.037	0.006	7.03e-09	0.484	-0.031	0.006	7.4e-07	HIVEP2;AIG1;RP11-439L18.3	HIVEP2	HIVEP2 [nearest(intergenic) / Non_PAN_ABC (Adp)] / AIG1 [Non_PAN_ABC (Adp)] / RP11-439L18.3 [Non_PAN_ABC (Adp)]
EUR-meta-89	6:153341618 - 6:153441618	EUR	6:153433701:T:C	rs6557267	Primary	RGS17	intronic	0.04	44	50.9	0.153	++	0.178	-0.021	0.008	0.00712	0.58	-0.036	0.006	2.93e-08	RGS17	RGS17	RGS17 [nearest(intronic) / Very-Strongly-Pan-related <PAN_ABC (beta; ductal; PAN_Nasser)> / Non_PAN_ABC (Co)]
EUR-meta-90	6:160720312 - 6:160820312	EUR	6:160770312:A:G	rs474513	Primary	SLC22A3	intronic	0.09	23	43.2	0.185	++	0.308	-0.028	0.006	1.66e-05	0.484	-0.04	0.006	4.18e-10	SLC22A3;LPAL2;SLC22A1;SLC22A2	SLC22A3	SLC22A3 [nearest(intronic) / Non_PAN_ABC (Adp; LIV; MuSc; THY; ADR; Brain; SI; Co); Non_PAN_SMR <Neg_Exp (LIV)>] / LPAL2 [Non_PAN_ABC (LIV)] / SLC22A1 [Non_PAN_ABC (LIV)] / SLC22A2 [Non_PAN_ABC (LIV)]
EUR-meta-91	6:164083001 - 6:164183001	EUR	6:164133001:C:T	rs4709746	Primary	QKI(+133.4kb)	intergenic	0.42	7	0	0.67	--	0.108	-0.051	0.01	3.63e-07	0.131	-0.057	0.01	3.95e-09	AL078585.1;QKI	QKI	AL078585.1 [Non_PAN_ABC (MuSc)] / QKI [nearest(intergenic)]
EAS-meta-86	6:166167635 - 6:166267635	EAS	6:166217635:A:G	rs80178954	Primary	PDE10A	intronic	0.16	14	90.6	0.00107	-+	0.05	0.077	0.014	3.2e-08	0.024	-0.007	0.022	0.749	PDE10A	PDE10A	PDE10A [nearest(intronic)]
EAS-meta-87	7:13837788 - 7:13937788	EAS	7:13886654:C:T	rs7787720	Primary	ETV1(-44.2kb)	intergenic	0.11	9	85.9	0.0078	++	0.414	0.048	0.006	3.59e-15	0.445	0.025	0.006	0.000151	ETV1	ETV1	ETV1 [nearest(intergenic) / Non_PAN_ABC (Brain)]
EAS-meta-88	7:15012983 - 7:15112983	EAS/EUR	7:14898282:C:T	rs17168486	Primary	DGKB	intronic	0.07	17	0	0.435	++	0.429	0.059	0.006	5.64e-23	0.18	0.067	0.008	4.5e-16	DGKB	DGKB	DGKB [nearest(intronic) / Non_PAN_SMR <Neg_Exp (Brain)>]
EAS-meta-89	7:15012983 - 7:15112983	EAS/EUR	7:15063923:T:G	rs10950550	Secondary	DGKB(+49.5kb)	intergenic	NA	NA	0	0.818	++	0.315	-0.061	0.006	4.71e-21	0.46	-0.063	0.006	3.73e-23	DGKB	DGKB	DGKB [nearest(intergenic)]
EUR-meta-93	7:15012983 - 7:15112983	EAS/EUR	7:14898282:C:T	rs17168486	Secondary	DGKB	intronic	NA	NA	0	0.435	++	0.429	0.059	0.006	5.64e-23	0.18	0.067	0.008	4.5e-16	DGKB	DGKB	DGKB [nearest(intronic) / Non_PAN_SMR <Pos_Exp (Brain)>]
EUR-meta-92	7:15012983 - 7:15112983	EAS/EUR	7:15062983:C:T	rs2215383	Primary	DGKB(+48.6kb)	intergenic	0.11	15	0	0.742	--	0.317	-0.061	0.006	5.16e-21	0.462	-0.064	0.006	1.06e-23	DGKB	DGKB	DGKB [nearest(intergenic)]
EAS-meta-90	7:25902059 - 7:26002059	EAS	7:25983492:T:C	rs7806251	Primary	NFE2L3(-208.4kb)	intergenic	0.28	7	59.4	0.117	++	0.495	-0.034	0.006	1.31e-08	0.729	-0.02	0.007	0.00667	NFE2L3	NFE2L3	NFE2L3 [nearest(intergenic)]
EAS-meta-91	7:28146222 - 7:28246222	EAS/EUR	7:28196222:A:G	rs849134	Primary	JAZF1	intronic	0.49	10	91.2	0.000742	++	0.225	-0.057	0.007	1.65e-15	0.492	-0.09	0.006	5.35e-45	JAZF1;JAZF1-AS1	JAZF1	JAZF1 [nearest(intronic) / Very-Strongly-Pan-related <PAN_ABC (beta)> / Non_PAN_ABC (ADR; Brain)] / JAZF1-AS1 [Non_PAN_ABC (ADR; Brain)]
EUR-meta-94	7:28146222 - 7:28246222	EAS/EUR	7:28198677:C:T	rs1708302	Primary	JAZF1	intronic	0.3	6	0	0.335	--	0.006	-0.051	0.041	0.221	0.488	-0.091	0.006	5.77e-46	JAZF1;JAZF1-AS1	JAZF1	JAZF1 [nearest(intronic) / Very-Strongly-Pan-related <PAN_ABC (beta)> / Non_PAN_ABC (ADR; Brain)] / JAZF1-AS1 [Non_PAN_ABC (ADR; Brain); Non_PAN_SMR <Pos_Exp (Adp-Sub; MuSc; THY; Brain; Co)>]
EAS-meta-92	7:30678452 - 7:30778452	EAS/EUR	7:30727920:T:C	rs6462220	Primary	CRHR2	intronic	0.1	33	0	0.588	++	0.188	-0.047	0.008	4.32e-09	0.245	-0.041	0.007	6.7e-08	CRHR2;GARS;GARS1	CRHR2	CRHR2 [nearest(intronic)] / GARS [Non_PAN_SMR <Neg_Exp (Blood)>] / GARS1 [Non_PAN_SMR <Neg_Exp (Brain)>]
EUR-meta-95	7:30678452 - 7:30778452	EAS/EUR	7:30728452:C:T	rs917195	Primary	CRHR2	exonic	0.38	3	0	0.95	--	0.19	-0.047	0.008	1.1e-08	0.229	-0.047	0.008	1.03e-09	CRHR2	CRHR2	CRHR2 [nearest(exonic)]
EAS-meta-93	7:44181216 - 7:44281216	EAS/EUR	7:44174857:G:T	rs2908279	Primary	MYL7(-3.6kb)	intergenic	0.27	7	48.4	0.164	--	0.375	-0.046	0.007	4.27e-11	0.495	-0.033	0.006	3.06e-07	AEBP1;MYL7;POLD2	MYL7	AEBP1 [Non_PAN_ABC (MuSc)] / MYL7 [nearest(intergenic)] / POLD2 [Non_PAN_ABC (MuSc)]
EUR-meta-96	7:44181216 - 7:44281216	EAS/EUR	7:44255643:G:A	rs878521	Primary	CAMK2B(-1.1kb)	intergenic	1	1	92.3	0.000304	++	0.387	0.027	0.006	2.53e-05	0.243	0.062	0.007	9.31e-17	CAMK2B;GCK	CAMK2B	CAMK2B [nearest(intergenic)] / GCK [Non_PAN_SMR <Pos_Exp (THY)>]
EAS-meta-94	7:55785078 - 7:55885078	EAS	7:56005602:ATAAGAAT:A	rs61414170	Primary	ZNF713	intronic	0.02	75	NA	NA	+?	0.35	0.038	0.006	1.54e-09	NA	NA	NA	NA	GBAS;ZNF713;CCT6A;MRPS17;PSPH	ZNF713	GBAS [Strongly-Pan-related <PAN_ABC (PAN_Nasser) / PAN-SMR (Neg_Exp)> / Non_PAN_ABC (Adp; LIV; MuSc; THY; ADR; Co); Non_PAN_SMR <Neg_Exp (THY)>] / ZNF713 [nearest(intronic) / Non_PAN_ABC (MuSc; ADR; Co); Non_PAN_SMR <Neg_Exp (Brain)>] / CCT6A [Non_PAN_ABC (ADR); Non_PAN_SMR <Pos_Exp (Blood)>] / MRPS17 [Pan-related <PAN_ABC (PAN_Nasser)> / Non_PAN_ABC (LIV; MuSc; THY; ADR; Co)] / PSPH [Non_PAN_ABC…
EAS-meta-95	7:69646905 - 7:69746905	EAS	7:69696905:A:G	rs12698877	Primary	AUTS2	intronic	0.06	44	91.8	0.000488	--	0.338	0.063	0.006	1.21e-23	0.271	0.03	0.007	2.51e-05	AUTS2	AUTS2	AUTS2 [nearest(intronic) / Non_PAN_ABC (Adp)]
EAS-meta-96	7:89691410 - 7:89791410	EAS	7:89734318:C:A	rs39204	Primary	STEAP1(-49.4kb)	intergenic	0.13	31	95.6	2.11e-06	++	0.217	0.064	0.007	1.21e-18	0.528	0.018	0.006	0.00611	STEAP2;C7orf63;CLDN12;STEAP1;STEAP2-AS1	STEAP2	STEAP2 [rs194520 [VEP_Medium: R2 (EAS:EUR=0.85:0.84)] / Very-Strongly-Pan-related <PAN_ABC (beta; PAN_Nasser) / PAN-SMR (Pos_Exp)> / Non_PAN_ABC (Adp; LIV; MuSc; THY; ADR; Brain; SI; Co); Non_PAN_SMR <Pos_Exp (Adp-Vis; THY; Co) / Neg_Exp (Adp-Sub; MuSc; ADR)>] / C7orf63 [Pan-related <PAN_ABC (PAN_Nasser)> / Non_PAN_ABC (Adp; LIV; MuSc; THY; ADR; Brain; SI; Co); Non_PAN_SMR <Neg_Exp (MuSc)>] / CLD…
EAS-meta-97	7:93060055 - 7:93160055	EAS	7:93110055:C:T	rs2299253	Primary	CALCR	intronic	0.12	16	79.3	0.0279	++	0.324	0.043	0.006	2.44e-11	0.506	0.023	0.006	0.000379	CALCR	CALCR	CALCR [nearest(intronic) / rs2301680 [VEP_Medium: R2 (EAS:EUR=0.99:1)]]
EAS-meta-98	7:102333690 - 7:102433690	EAS/EUR	7:102336979:T:C	rs75990271	Primary	POLR2J2(+24.9kb)	intergenic	0.2	27	95.9	8.31e-07	+-	0.185	-0.066	0.01	3.22e-11	0.068	0.016	0.013	0.221	ARMC10;LOC100289561;LOC100630923;RASA4;RPL19P12	RASA4	ARMC10 [Very-Strongly-Pan-related <PAN_ABC (beta; alpha; acinar; ductal)> / Non_PAN_ABC (Adp; MuSc; ADR; Brain; Co)] / LOC100289561 [Very-Strongly-Pan-related <PAN_ABC (beta; alpha; ductal)>] / LOC100630923 [Very-Strongly-Pan-related <PAN_ABC (beta; alpha; ductal)>] / RASA4 [Very-Strongly-Pan-related <PAN_ABC (beta; alpha)>] / RPL19P12 [Strongly-Pan-related <PAN_ABC (alpha; acinar; ductal)>]
EUR-meta-97	7:102333690 - 7:102433690	EAS/EUR	7:102486254:T:C	rs11496066	Primary	FBXL13	intronic	0.13	17	77.3	0.0357	++	0.005	-0.156	0.049	0.00158	0.183	-0.051	0.008	8.17e-10	FBXL13;FAM185A;POLR2J3;SPDYE2	FBXL13	FBXL13 [nearest(intronic)] / FAM185A [rs17842496 [VEP_Low: R2 (EAS:EUR=0.91:0.96)]] / POLR2J3 [Non_PAN_SMR <Neg_Exp (Blood)>] / SPDYE2 [Non_PAN_SMR <Neg_Exp (MuSc; Blood)>]
EAS-meta-99	7:125378042 - 7:125478042	EAS	7:125428042:G:T	rs118159699	Primary	GRM8(-650.6kb)	intergenic	0.57	26	NA	NA	+?	0.015	0.166	0.03	4.04e-08	NA	NA	NA	NA	GRM8	GRM8	GRM8 [nearest(intergenic)]
EAS-meta-100	7:127203550 - 7:127303550	EAS	7:127253550:C:T	rs2233580	Primary	PAX4	exonic	1	1	NA	NA	+?	0.09	0.279	0.011	5.07e-151	NA	NA	NA	NA	PAX4;ARF5	PAX4	PAX4 [nearest(exonic) / rs2233580 [VEP_Medium: R2 (EAS:EUR=1:1)]] / ARF5 [Non_PAN_SMR <Neg_Exp (Blood)>]
EAS-meta-101	7:127203550 - 7:127303550	EAS	7:127253551:G:T	rs3824004	Secondary	PAX4	exonic	NA	NA	NA	NA	+?	0.033	0.201	0.016	2.33e-35	NA	NA	NA	NA	HILPDA;IMPDH1;METTL2B;PAX4;RBM28	RBM28	HILPDA [Very-Strongly-Pan-related <PAN_ABC (beta; alpha; acinar; ductal; PAN_Nasser)> / Non_PAN_ABC (Adp; LIV; MuSc; THY; ADR; Brain; SI; Co)] / IMPDH1 [Strongly-Pan-related <PAN_ABC (acinar; PAN_Nasser)> / Non_PAN_ABC (Adp; LIV; MuSc; THY; ADR; Brain; SI; Co)] / METTL2B [Very-Strongly-Pan-related <PAN_ABC (beta; acinar; ductal; PAN_Nasser)> / Non_PAN_ABC (LIV; THY; ADR; Brain; SI; Co)] / PAX4 [n…
EAS-meta-103	7:127203550 - 7:127303550	EAS	7:127170600:G:A	rs189356053	Secondary	GCC1(-50.1kb)	intergenic	NA	NA	NA	NA	+?	0.007	0.394	0.059	2.53e-11	NA	NA	NA	NA	ARF5;GCC1	GCC1	ARF5 [Non_PAN_SMR <Neg_Exp (Blood)>] / GCC1 [nearest(intergenic)]
EAS-meta-102	7:127203550 - 7:127303550	EAS	7:127200646:T:C	rs139034871	Secondary	GCC1(-20kb)	intergenic	NA	NA	NA	NA	-?	0.021	0.165	0.026	2.2e-10	NA	NA	NA	NA	ARF5;GCC1	GCC1	ARF5 [Non_PAN_SMR <Neg_Exp (Blood)>] / GCC1 [nearest(intergenic)]
EUR-meta-98	7:130407926 - 7:130507926	EUR	7:130457914:A:G	rs1562396	Primary	KLF14(+39kb)	intergenic	0.12	26	87.2	0.00522	--	0.472	0.029	0.006	3.15e-06	0.32	0.056	0.007	9.63e-16	KLF14	KLF14	KLF14 [nearest(intergenic)]
EAS-meta-104	7:140386560 - 7:140486560	EAS	7:140630353:A:T	rs62485379	Primary	BRAF(+5.8kb)	intergenic	0.09	70	56.3	0.13	--	0.078	0.071	0.011	2.11e-10	0.07	0.045	0.013	0.000269	BRAF;MRPS33;ADCK2;AGK;NDUFB2	BRAF	BRAF [nearest(intergenic) / Very-Strongly-Pan-related <PAN_ABC (beta; PAN_Nasser)> / Non_PAN_ABC (Adp; MuSc; THY; ADR; Brain; SI)] / MRPS33 [Very-Strongly-Pan-related <PAN_ABC (beta; alpha; acinar; ductal; PAN_Nasser)> / Non_PAN_ABC (Adp; MuSc; THY; ADR; Brain; SI); Non_PAN_SMR <Pos_Exp (Brain; Blood)>] / ADCK2 [Very-Strongly-Pan-related <PAN_ABC (beta; alpha; ductal; PAN_Nasser)> / Non_PAN_ABC (…
EUR-meta-99	7:150487635 - 7:150587635	EUR	7:150537635:A:G	rs62492368	Primary	AOC1	intronic	0.78	21	80.6	0.0233	++	0.407	-0.023	0.006	0.000281	0.688	-0.044	0.007	1.92e-10	AOC1	AOC1	AOC1 [nearest(intronic) / Non_PAN_SMR <Pos_Exp (THY)>]
EAS-meta-106	7:156974510 - 7:157074510	EAS/EUR	7:156794983:G:A	rs887609	Secondary	MNX1	intronic	NA	NA	94.2	3.53e-05	++	0.226	0.061	0.008	3.8e-14	0.218	0.014	0.008	0.0706	MNX1;NOM1;UBE3C	MNX1	MNX1 [nearest(intronic)] / NOM1 [Non_PAN_SMR <Neg_Exp (Blood)>] / UBE3C [Non_PAN_SMR <Neg_Exp (MuSc; Brain; Blood)>]
EAS-meta-105	7:156974510 - 7:157074510	EAS/EUR	7:157024510:G:A	rs1182444	Primary	UBE3C	intronic	0.06	84	0	0.578	--	0.495	-0.053	0.006	2.37e-18	0.338	-0.058	0.007	8.27e-18	UBE3C;DNAJB6;MNX1-AS1;NOM1;MNX1	UBE3C	UBE3C [nearest(intronic) / rs2301914 [VEP_High: R2 (EAS:EUR=0.99:1)] / Very-Strongly-Pan-related <PAN_ABC (beta; alpha; ductal; PAN_Nasser)> / Non_PAN_ABC (Adp; LIV; MuSc; THY; ADR; Brain; SI; Co); Non_PAN_SMR <Neg_Exp (MuSc; Brain; Blood)>] / DNAJB6 [Strongly-Pan-related <PAN_ABC (acinar; ductal; PAN_Nasser)> / Non_PAN_ABC (Adp; LIV; MuSc; THY; ADR; Brain; SI; Co)] / MNX1-AS1 [Strongly-Pan-relat…
EUR-meta-100	7:156974510 - 7:157074510	EAS/EUR	7:156975136:G:A	rs6459737	Primary	UBE3C	intronic	0.04	71	0	0.443	--	0.495	-0.051	0.006	1.29e-17	0.338	-0.058	0.007	3.31e-18	UBE3C;DNAJB6;MNX1-AS1;MNX1;NOM1	UBE3C	UBE3C [nearest(intronic) / rs2301914 [VEP_High: R2 (EAS:EUR=0.98:0.99)] / Very-Strongly-Pan-related <PAN_ABC (beta; alpha; ductal; PAN_Nasser)> / Non_PAN_ABC (Adp; LIV; MuSc; THY; ADR; Brain; SI; Co); Non_PAN_SMR <Neg_Exp (Brain)>] / DNAJB6 [Strongly-Pan-related <PAN_ABC (acinar; ductal; PAN_Nasser)> / Non_PAN_ABC (Adp; LIV; MuSc; THY; ADR; Brain; SI; Co)] / MNX1-AS1 [Strongly-Pan-related <PAN_AB…
EUR-meta-101	8:9924824 - 8:10024824	EUR	8:9996389:G:A	rs34990153	Primary	MSRA	intronic	0.59	4	NA	NA	?+	NA	NA	NA	NA	0.56	0.048	0.006	2.26e-13	MSRA;CLDN23;ERI1;MFHAS1;MTMR9	MSRA	MSRA [nearest(intronic) / Non_PAN_ABC (Adp; ADR; Brain); Non_PAN_SMR <Neg_Exp (Blood)>] / CLDN23 [Non_PAN_ABC (Adp)] / ERI1 [Non_PAN_ABC (Adp)] / MFHAS1 [Non_PAN_ABC (Adp)] / MTMR9 [Non_PAN_ABC (Adp)]
EUR-meta-102	8:12574425 - 8:12674425	EUR	8:12618225:T:A	rs12680692	Primary	LONRF1(+4.6kb)	intergenic	0.36	7	90	0.00155	++	0.347	0.009	0.007	0.198	0.321	0.041	0.007	6.6e-09	LONRF1;AC068587.4	LONRF1	LONRF1 [nearest(intergenic) / Non_PAN_ABC (MuSc; THY; Co)] / AC068587.4 [Non_PAN_SMR <Pos_Exp (Brain)>]
EAS-meta-107	8:17864865 - 8:17964865	EAS	8:17914865:TA:T	rs5889764	Primary	ASAH1	3UTR	0.03	84	NA	NA	+?	0.064	0.075	0.012	4.57e-10	NA	NA	NA	NA	ASAH1;AC124242.1;AC124242.2	ASAH1	ASAH1 [nearest(3UTR)] / AC124242.1 [Non_PAN_SMR <Pos_Exp (Brain)>] / AC124242.2 [Non_PAN_SMR <Pos_Exp (Brain)>]
EUR-meta-103	8:19794415 - 8:19894415	EUR	8:19844415:A:G	rs7819706	Primary	LPL(+19.6kb)	intergenic	0.17	39	87.4	0.0048	++	0.116	-0.028	0.01	0.00326	0.117	-0.067	0.01	2.82e-11	LPL	LPL	LPL [nearest(intergenic) / Non_PAN_SMR <Neg_Exp (Blood)>]
EAS-meta-108	8:36799946 - 8:36899946	EAS	8:36832310:G:A	rs56687477	Primary	KCNU1(+38.7kb)	intergenic	0.58	15	65.1	0.0904	++	0.322	0.045	0.006	4.28e-12	0.155	0.026	0.009	0.00388	KCNU1;RP11-419C23.1	KCNU1	KCNU1 [nearest(intergenic)] / RP11-419C23.1 [Non_PAN_SMR <Pos_Exp (Adp-Sub)>]
EAS-meta-109	8:37347803 - 8:37447803	EAS	8:37391203:G:C	rs4739515	Primary	ZNF703(-162.1kb)	intergenic	0.13	11	0	0.937	--	0.465	-0.04	0.006	4.83e-11	0.048	-0.039	0.015	0.0115	ZNF703;RP11-150O12.6	ZNF703	ZNF703 [nearest(intergenic) / Non_PAN_SMR <Pos_Exp (Adp-Sub)>] / RP11-150O12.6 [Non_PAN_ABC (Adp)]
EAS-meta-110	8:38308081 - 8:38408081	EAS	8:38343012:C:T	rs328301	Primary	FGFR1(+16.7kb)	intergenic	0.16	34	84.2	0.012	++	0.338	0.036	0.006	2.84e-08	0.381	0.013	0.007	0.0561	FGFR1;C8orf86;LETM2;PPAPDC1B;WHSC1L1	FGFR1	FGFR1 [nearest(intergenic) / Pan-related <PAN_ABC (PAN_Nasser)> / Non_PAN_ABC (Adp; LIV; MuSc; THY; ADR; Brain; SI; Co); Non_PAN_SMR <Pos_Exp (Brain; Blood)>] / C8orf86 [Pan-related <PAN_ABC (PAN_Nasser)> / Non_PAN_ABC (Adp; MuSc; THY; Brain)] / LETM2 [Non_PAN_ABC (Adp)] / PPAPDC1B [Non_PAN_ABC (Adp)] / WHSC1L1 [Non_PAN_ABC (Adp)]
EAS-meta-111	8:41459915 - 8:41559915	EAS/EUR	8:41506152:C:G	rs4736999	Primary	NKX6-3	intronic	0.17	16	1.2	0.314	--	0.44	0.07	0.006	7.02e-31	0.557	0.061	0.006	7.53e-21	NKX6-3;AC009630.1;ANK1	NKX6-3	NKX6-3 [nearest(intronic) / Very-Strongly-Pan-related <PAN_ABC (beta)>] / AC009630.1 [Non_PAN_SMR <Neg_Exp (Brain)>] / ANK1 [Non_PAN_SMR <Neg_Exp (Adp-Sub; MuSc; Brain; Co; Blood)>]
EAS-meta-112	8:41459915 - 8:41559915	EAS/EUR	8:41491523:G:A	rs117751478	Secondary	AGPAT6(+9kb)	intergenic	NA	NA	0	0.77	--	0.025	-0.096	0.02	1.55e-06	0.001	-0.172	0.26	0.509	NKX6-3;AGPAT6;AC009630.1;ANK1;GINS4	NKX6-3	NKX6-3 [Very-Strongly-Pan-related <PAN_ABC (beta)>] / AGPAT6 [nearest(intergenic) / Non_PAN_ABC (LIV)] / AC009630.1 [Non_PAN_SMR <Neg_Exp (Brain)>] / ANK1 [Non_PAN_SMR <Neg_Exp (Adp-Sub; MuSc; Brain; Co; Blood)>] / GINS4 [Non_PAN_ABC (LIV)]
EAS-meta-113	8:41459915 - 8:41559915	EAS/EUR	8:41479356:G:A	rs141315854	Secondary	AGPAT6	3UTR	NA	NA	NA	NA	-?	0.013	-0.246	0.032	7.03e-15	NA	NA	NA	NA	AGPAT6;ANK1;AC009630.1	AGPAT6	AGPAT6 [nearest(3UTR)] / ANK1 [Non_PAN_ABC (LIV); Non_PAN_SMR <Neg_Exp (Adp-Sub; MuSc; Brain; Co; Blood)>] / AC009630.1 [Non_PAN_SMR <Neg_Exp (Brain)>]
EAS-meta-114	8:41459915 - 8:41559915	EAS/EUR	8:41529172:A:G	rs59864562	Secondary	ANK1	intronic	NA	NA	NA	NA	+?	0.108	-0.11	0.012	1.12e-21	NA	NA	NA	NA	ANK1;AC009630.1;AGPAT6;GINS4	ANK1	ANK1 [nearest(intronic) / Non_PAN_SMR <Neg_Exp (Adp-Sub; MuSc; Brain; Co; Blood)>] / AC009630.1 [Non_PAN_SMR <Neg_Exp (Brain)>] / AGPAT6 [Non_PAN_ABC (MuSc)] / GINS4 [Non_PAN_ABC (MuSc)]
EAS-meta-115	8:41459915 - 8:41559915	EAS/EUR	8:41278325:C:T	rs183052157	Secondary	GOLGA7(-69.6kb)	intergenic	NA	NA	NA	NA	+?	0.002	0.382	0.091	2.81e-05	NA	NA	NA	NA	AC009630.1;ANK1;GOLGA7	GOLGA7	AC009630.1 [Non_PAN_SMR <Neg_Exp (Brain)>] / ANK1 [Non_PAN_SMR <Neg_Exp (Adp-Sub; MuSc; Co)>] / GOLGA7 [nearest(intergenic)]
EUR-meta-105	8:41459915 - 8:41559915	EAS/EUR	8:41500861:C:T	rs59191643	Secondary	NKX6-3(-1.8kb)	intergenic	NA	NA	33.6	0.22	++	0.479	0.061	0.006	2.71e-22	0.628	0.05	0.007	5.5e-14	ANK1;NKX6-3	NKX6-3	ANK1 [Non_PAN_SMR <Neg_Exp (Adp-Sub; MuSc; Brain; Co; Blood)>] / NKX6-3 [nearest(intergenic)]
EUR-meta-104	8:41459915 - 8:41559915	EAS/EUR	8:41522991:G:A	rs508419	Primary	ANK1	intronic	0.24	9	0	0.349	--	0.136	-0.092	0.009	2.96e-25	0.236	-0.081	0.007	5.43e-27	ANK1;NKX6-3;AGPAT6;C8orf4;GINS4	NKX6-3	ANK1 [nearest(intronic) / rs515071 [VEP_Medium: R2 (EAS:EUR=0.76:0.98)] / Non_PAN_SMR <Neg_Exp (Adp-Sub; MuSc; Brain; Co; Blood)>] / NKX6-3 [Very-Strongly-Pan-related <PAN_ABC (beta)>] / AGPAT6 [Non_PAN_ABC (MuSc)] / C8orf4 [Non_PAN_ABC (MuSc)] / GINS4 [Non_PAN_ABC (MuSc)]
EAS-meta-116	8:57448704 - 8:57548704	EAS	8:57499227:G:GA	rs11380154	Primary	PENK(+139.9kb)	intergenic	0.16	12	NA	NA	-?	0.335	0.037	0.006	8.37e-09	NA	NA	NA	NA	LINC00968;PENK	LINC00968	LINC00968 [Pan-related <PAN_ABC (PAN_Nasser)> / Non_PAN_ABC (Adp; LIV; MuSc; ADR; Co)] / PENK [nearest(intergenic)]
EAS-meta-117	8:75147129 - 8:75247129	EAS	8:75214398:A:G	rs149265787	Primary	JPH1	intronic	0.22	9	74	0.05	--	0.023	0.136	0.02	1.68e-11	0.012	0.064	0.031	0.0373	JPH1	JPH1	JPH1 [nearest(intronic)]
EAS-meta-118	8:95911626 - 8:96011626	EAS/EUR	8:95891854:C:CT	8:95891854:C:CT	Primary	INTS8	intronic	0.26	95	NA	NA	+?	0.286	0.042	0.007	4.38e-09	NA	NA	NA	NA	INTS8;NDUFAF6	INTS8	INTS8 [nearest(intronic) / Non_PAN_SMR <Neg_Exp (Blood)>] / NDUFAF6 [Non_PAN_SMR <Pos_Exp (Brain)>]
EUR-meta-106	8:95911626 - 8:96011626	EAS/EUR	8:95961626:C:T	rs10097617	Primary	TP53INP1:NDUFAF6	5UTR:intronic	0.26	12	43.2	0.184	++	0.296	0.036	0.007	2.62e-08	0.485	0.049	0.006	2.44e-14	TP53INP1;INTS8;NDUFAF6;CCNE2;LOC105375650	TP53INP1	TP53INP1 [nearest(5UTR:intronic) / Very-Strongly-Pan-related <PAN_ABC (beta; alpha; acinar; ductal; PAN_Nasser)> / Non_PAN_ABC (Adp; LIV; MuSc; THY; ADR; Brain; SI; Co); Non_PAN_SMR <Pos_Exp (Brain) / Neg_Exp (Blood)>] / INTS8 [Very-Strongly-Pan-related <PAN_ABC (beta; PAN_Nasser)> / Non_PAN_ABC (LIV; MuSc; ADR; Brain); Non_PAN_SMR <Neg_Exp (Blood)>] / NDUFAF6 [Very-Strongly-Pan-related <PAN_ABC …
EUR-meta-107	8:116418082 - 8:116518082	EUR	8:116482423:A:G	rs3808415	Primary	TRPS1	intronic	0.02	102	57.7	0.124	--	0.193	0.02	0.008	0.0111	0.443	0.035	0.006	4.65e-08	TRPS1;CSMD3;EIF3H;UTP23	TRPS1	TRPS1 [nearest(intronic) / Non_PAN_ABC (MuSc); Non_PAN_SMR <Pos_Exp (Brain)>] / CSMD3 [Non_PAN_ABC (MuSc)] / EIF3H [Non_PAN_ABC (MuSc)] / UTP23 [Non_PAN_ABC (MuSc)]
EAS-meta-119	8:118134783 - 8:118234783	EAS/EUR	8:118184783:C:T	rs13266634	Primary	SLC30A8	exonic	1	1	0	0.956	--	0.423	-0.108	0.006	2.16e-72	0.315	-0.108	0.007	1.44e-54	SLC30A8	SLC30A8	SLC30A8 [nearest(exonic) / rs13266634 [VEP_Low: R2 (EAS:EUR=1:1)]]
EUR-meta-108	8:118134783 - 8:118234783	EAS/EUR	8:118185025:G:A	rs3802177	Primary	SLC30A8	3UTR	0.49	2	0	0.702	--	0.432	-0.104	0.006	1.62e-67	0.315	-0.108	0.007	9.16e-55	SLC30A8	SLC30A8	SLC30A8 [nearest(3UTR) / rs13266634 [VEP_Low: R2 (EAS:EUR=0.98:0.99)]]
EAS-meta-120	8:126424751 - 8:126524751	EAS	8:126474751:C:T	rs78938736	Primary	TRIB1(+24.1kb)	intergenic	0.76	7	NA	NA	+?	0.352	0.041	0.007	4.05e-09	NA	NA	NA	NA	TRIB1;KIAA0196;NSMCE2	TRIB1	TRIB1 [nearest(intergenic) / Non_PAN_ABC (ADR)] / KIAA0196 [Non_PAN_ABC (ADR)] / NSMCE2 [Non_PAN_ABC (ADR)]
EUR-meta-109	8:128661742 - 8:128761742	EUR	8:128711742:G:A	rs17772814	Primary	MYC(-35.9kb)	intergenic	1	1	NA	NA	?-	NA	NA	NA	NA	0.086	-0.075	0.013	2.13e-09	MYC	MYC	MYC [nearest(intergenic)]
EUR-meta-110	8:129521140 - 8:129621140	EUR	8:129568078:T:C	rs1561927	Primary	TMEM75(+607.5kb)	intergenic	0.02	47	11.4	0.288	--	0.034	0.062	0.018	0.000385	0.267	0.042	0.007	6.11e-09	CCAT1;FAM49B;MYC;CASC11;PVT1	CCAT1	CCAT1 [Strongly-Pan-related <PAN_ABC (acinar; ductal; PAN_Nasser)>] / FAM49B [Strongly-Pan-related <PAN_ABC (acinar; ductal; PAN_Nasser)> / Non_PAN_ABC (LIV)] / MYC [Strongly-Pan-related <PAN_ABC (acinar; ductal; PAN_Nasser)> / Non_PAN_ABC (LIV)] / CASC11 [Pan-related <PAN_ABC (PAN_Nasser)> / Non_PAN_ABC (LIV)] / PVT1 [Pan-related <PAN_ABC (PAN_Nasser)> / Non_PAN_ABC (LIV)]
EAS-meta-121	8:132825320 - 8:132925320	EAS	8:132881255:G:A	rs16904538	Primary	EFR3A(-35.1kb)	intergenic	0.03	52	0	0.342	++	0.268	0.04	0.007	3.27e-09	0.11	0.028	0.01	0.00533	EFR3A	EFR3A	EFR3A [nearest(intergenic)]
EUR-meta-111	8:145496036 - 8:145596036	EUR	8:145507304:T:C	rs4977213	Primary	BOP1	intronic	0.11	15	92.4	0.000274	--	0.41	0.017	0.006	0.00814	0.372	0.051	0.007	2.19e-13	BOP1;DGAT1;FBXL6;HSF1;TMEM249	BOP1	BOP1 [nearest(intronic) / Pan-related <PAN_ABC (PAN_Nasser)> / Non_PAN_ABC (Adp; LIV; MuSc; Brain)] / DGAT1 [Pan-related <PAN_ABC (PAN_Nasser)> / Non_PAN_ABC (Adp; LIV; MuSc; ADR; Brain)] / FBXL6 [Pan-related <PAN_ABC (PAN_Nasser)> / Non_PAN_ABC (Adp; LIV; MuSc; Brain)] / HSF1 [Pan-related <PAN_ABC (PAN_Nasser)> / Non_PAN_ABC (Adp; LIV; MuSc; Brain)] / TMEM249 [Pan-related <PAN_ABC (PAN_Nasser)> …
EUR-meta-112	8:145496036 - 8:145596036	EUR	8:145879883:T:C	rs12719778	Secondary	ARHGAP39	intronic	NA	NA	72.8	0.0552	++	0.292	-0.02	0.007	0.00272	0.464	-0.038	0.006	4.38e-09	ARHGAP39;RPL8;C8orf82;CTD-2517M22.14;CYHR1	ARHGAP39	ARHGAP39 [nearest(intronic) / Non_PAN_SMR <Neg_Exp (Blood)>] / RPL8 [Pan-related <PAN-SMR (Pos_Exp)> / Non_PAN_SMR <Pos_Exp (Adp-Sub; Adp-Vis; LIV; MuSc; THY; Brain; PIT; Co) / Neg_Exp (Blood)>] / C8orf82 [Non_PAN_SMR <Neg_Exp (Blood)>] / CTD-2517M22.14 [Non_PAN_SMR <Neg_Exp (Blood)>] / CYHR1 [Non_PAN_SMR <Neg_Exp (Blood)>]
EAS-meta-122	9:982567 - 9:1082567	EAS	9:1032567:G:A	rs1016565	Primary	DMRT2(-17.8kb)	intergenic	0.14	19	0	0.325	++	0.425	0.033	0.006	4.27e-08	0.313	0.024	0.007	0.000543	DMRT2	DMRT2	DMRT2 [nearest(intergenic)]
EUR-meta-113	9:3223781 - 9:3323781	EUR	9:3273781:T:C	rs672271	Primary	RFX3	intronic	0.38	83	90.6	0.00108	--	0.09	0.009	0.011	0.438	0.094	0.06	0.011	4.82e-08	RFX3	RFX3	RFX3 [nearest(intronic)]
EAS-meta-123	9:4241928 - 9:4341928	EAS/EUR	9:4290085:G:C	rs4237150	Primary	GLIS3	intronic	0.84	2	86.6	0.00622	++	0.43	0.067	0.006	8.87e-29	0.416	0.043	0.006	5.3e-11	CDC37L1;GLIS3;KIAA0020;PPAPDC2;SPATA6L	GLIS3	CDC37L1 [Pan-related <PAN_ABC (PAN_Nasser)> / Non_PAN_ABC (MuSc)] / GLIS3 [nearest(intronic)] / KIAA0020 [Pan-related <PAN_ABC (PAN_Nasser)>] / PPAPDC2 [Pan-related <PAN_ABC (PAN_Nasser)> / Non_PAN_ABC (MuSc)] / SPATA6L [Pan-related <PAN_ABC (PAN_Nasser)> / Non_PAN_ABC (MuSc)]
EUR-meta-114	9:4241928 - 9:4341928	EAS/EUR	9:4291928:A:C	rs10974438	Primary	GLIS3	intronic	0.42	6	49.1	0.161	--	0.366	0.064	0.006	9.26e-25	0.358	0.051	0.007	1.71e-14	GLIS3	GLIS3	GLIS3 [nearest(intronic)]
EUR-meta-115	9:19016115 - 9:19116115	EUR	9:19065825:A:G	rs62563593	Primary	HAUS6	intronic	0.1	18	67.8	0.0779	--	0.222	0.022	0.007	0.00202	0.394	0.039	0.006	1.28e-09	HAUS6;PLIN2;RPS6;RRAGA;SH3GL2	RRAGA	HAUS6 [nearest(intronic) / Pan-related <PAN_ABC (PAN_Nasser)> / Non_PAN_ABC (Adp; LIV; MuSc; THY; ADR; Brain; SI; Co); Non_PAN_SMR <Pos_Exp (Adp-Vis)>] / PLIN2 [Strongly-Pan-related <PAN_ABC (alpha; acinar; ductal; PAN_Nasser)> / Non_PAN_ABC (Adp; LIV; MuSc; THY; ADR; Brain; SI; Co)] / RPS6 [Very-Strongly-Pan-related <PAN_ABC (beta; alpha; acinar; ductal; PAN_Nasser)> / Non_PAN_ABC (Adp; LIV; MuS…
EAS-meta-125	9:22084094 - 9:22184094	EAS/EUR	9:22137685:T:G	rs7018475	Secondary	CDKN2B(+128.3kb)	intergenic	NA	NA	96.6	5.16e-08	--	0.371	0.052	0.006	7.89e-17	0.269	0.104	0.007	3.02e-47	CDKN2B	CDKN2B	CDKN2B [nearest(intergenic)]
EAS-meta-128	9:22084094 - 9:22184094	EAS/EUR	9:22140627:T:G	rs7866410	Secondary	CDKN2B(+131.3kb)	intergenic	NA	NA	93.7	6.72e-05	-+	0.037	0.091	0.021	2.58e-05	0.172	-0.002	0.009	0.807	CDKN2B	CDKN2B	CDKN2B [nearest(intergenic)]
EAS-meta-124	9:22084094 - 9:22184094	EAS/EUR	9:22132878:T:C	rs10965248	Primary	CDKN2B(+123.5kb)	intergenic	0.2	5	72.8	0.0553	++	0.434	-0.176	0.006	8.55e-188	0.175	-0.156	0.009	1.36e-73	CDKN2B	CDKN2B	CDKN2B [nearest(intergenic)]
EAS-meta-129	9:22084094 - 9:22184094	EAS/EUR	9:21802922:C:G	rs117769854	Secondary	MTAP	exonic	NA	NA	56.6	0.129	-+	0.088	0.032	0.014	0.0203	0.025	-0.008	0.022	0.712	MTAP;CDKN2A;CDKN2B;DMRTA1;KLHL9	MTAP	MTAP [nearest(exonic) / Very-Strongly-Pan-related <PAN_ABC (beta; acinar; ductal; PAN_Nasser)> / Non_PAN_ABC (Adp; LIV; MuSc; THY; ADR; Brain; SI; Co)] / CDKN2A [Very-Strongly-Pan-related <PAN_ABC (beta; PAN_Nasser)> / Non_PAN_ABC (Adp; LIV; MuSc; ADR; Brain)] / CDKN2B [Very-Strongly-Pan-related <PAN_ABC (beta; acinar; ductal; PAN_Nasser)> / Non_PAN_ABC (Adp; LIV; MuSc; THY; ADR; Brain; SI; Co)] …
EAS-meta-126	9:22084094 - 9:22184094	EAS/EUR	9:22230135:G:T	rs193282086	Secondary	DMRTA1(-216.7kb)	intergenic	NA	NA	0	0.767	--	0.025	-0.137	0.02	2.94e-11	0.005	-0.16	0.077	0.0371	DMRTA1	DMRTA1	DMRTA1 [nearest(intergenic)]
EAS-meta-127	9:22084094 - 9:22184094	EAS/EUR	9:22130560:G:GA	9:22130560:GA:G	Secondary	CDKN2B(+121.2kb)	intergenic	NA	NA	NA	NA	+?	0.255	-0.15	0.009	3.2e-66	NA	NA	NA	NA	CDKN2B	CDKN2B	CDKN2B [nearest(intergenic)]
EAS-meta-130	9:22084094 - 9:22184094	EAS/EUR	9:22075777:C:T	rs77478272	Secondary	CDKN2B(+66.4kb)	intergenic	NA	NA	NA	NA	-?	0.013	-0.082	0.029	0.00432	NA	NA	NA	NA	CDKN2B	CDKN2B	CDKN2B [nearest(intergenic)]
EUR-meta-117	9:22084094 - 9:22184094	EAS/EUR	9:22137685:T:G	rs7018475	Secondary	CDKN2B(+128.3kb)	intergenic	NA	NA	96.6	5.16e-08	--	0.371	0.052	0.006	7.89e-17	0.269	0.104	0.007	3.02e-47	CDKN2B;CDKN2A;CDKN2B-AS1	CDKN2B	CDKN2B [nearest(intergenic) / Non_PAN_SMR <Pos_Exp (Blood) / Neg_Exp (Brain)>] / CDKN2A [Non_PAN_SMR <Neg_Exp (Brain)>] / CDKN2B-AS1 [Non_PAN_SMR <Neg_Exp (Brain)>]
EUR-meta-118	9:22084094 - 9:22184094	EAS/EUR	9:22043612:C:T	rs1412830	Secondary	CDKN2B(+34.2kb)	intergenic	NA	NA	95.5	2.34e-06	+-	0.131	0.002	0.009	0.828	0.373	-0.051	0.007	3.85e-14	CDKN2A;CDKN2B;CDKN2B-AS1;KLHL9;MTAP	CDKN2B	CDKN2A [Very-Strongly-Pan-related <PAN_ABC (beta; PAN_Nasser)> / Non_PAN_ABC (Adp; MuSc; Brain); Non_PAN_SMR <Neg_Exp (Brain)>] / CDKN2B [nearest(intergenic) / Very-Strongly-Pan-related <PAN_ABC (beta; acinar; ductal; PAN_Nasser)> / Non_PAN_ABC (Adp; LIV; MuSc; ADR; Brain; SI; Co); Non_PAN_SMR <Pos_Exp (Blood) / Neg_Exp (Brain)>] / CDKN2B-AS1 [Pan-related <PAN_ABC (PAN_Nasser)> / Non_PAN_ABC (Adp…
EUR-meta-116	9:22084094 - 9:22184094	EAS/EUR	9:22134068:G:A	rs10811660	Primary	CDKN2B(+124.7kb)	intergenic	0.32	3	54.2	0.139	--	0.433	-0.175	0.006	8.25e-187	0.17	-0.16	0.009	2.54e-77	CDKN2B;CDKN2A;CDKN2B-AS1	CDKN2B	CDKN2B [nearest(intergenic) / Non_PAN_SMR <Pos_Exp (Blood) / Neg_Exp (Brain)>] / CDKN2A [Non_PAN_SMR <Neg_Exp (Brain)>] / CDKN2B-AS1 [Non_PAN_SMR <Neg_Exp (Brain)>]
EUR-meta-120	9:22084094 - 9:22184094	EAS/EUR	9:22962383:G:C	rs10738642	Secondary	DMRTA1(+506.6kb)	intergenic	NA	NA	0	0.794	++	0.079	0.01	0.013	0.43	0.074	0.015	0.013	0.261	DMRTA1	DMRTA1	DMRTA1 [nearest(intergenic)]
EUR-meta-119	9:22084094 - 9:22184094	EAS/EUR	9:22526809:C:A	rs117674623	Secondary	DMRTA1(+71.1kb)	intergenic	NA	NA	NA	NA	?+	NA	NA	NA	NA	0.009	0.108	0.035	0.0021	DMRTA1	DMRTA1	DMRTA1 [nearest(intergenic)]
EUR-meta-121	9:28360683 - 9:28460683	EUR	9:28410683:T:C	rs1412234	Primary	LINGO2	intronic	0.21	14	88	0.00394	--	0.192	0.01	0.008	0.192	0.326	0.039	0.007	7.71e-09	LINGO2	LINGO2	LINGO2 [nearest(intronic)]
EUR-meta-122	9:34024476 - 9:34124476	EUR	9:34074476:C:T	rs12001437	Primary	DCAF12(-11.9kb)	intergenic	0.46	77	55.7	0.133	--	0.422	-0.027	0.006	1.31e-05	0.631	-0.04	0.007	1.1e-09	DCAF12;UBAP2	DCAF12	DCAF12 [nearest(intergenic) / Pan-related <PAN_ABC (PAN_Nasser)>] / UBAP2 [Pan-related <PAN_ABC (PAN_Nasser)> / Non_PAN_ABC (ADR; SI)]
EAS-meta-131	9:81867127 - 9:81967127	EAS/EUR	9:81917111:GCAT:G	rs67313856	Primary	TLE4(-269.6kb)	intergenic	0.14	9	NA	NA	-?	0.054	-0.086	0.013	1.57e-10	NA	NA	NA	NA	TLE4	TLE4	TLE4 [nearest(intergenic)]
EUR-meta-123	9:81867127 - 9:81967127	EAS/EUR	9:81905590:A:G	rs17791513	Primary	TLE4(-281.1kb)	intergenic	0.69	6	0	0.417	++	0.056	-0.086	0.015	3.65e-09	0.068	-0.102	0.013	1.35e-14	TLE4	TLE4	TLE4 [nearest(intergenic)]
EAS-meta-134	9:84258948 - 9:84358948	EAS/EUR	9:84241308:T:C	rs815843	Secondary	TLE1	intronic	NA	NA	90.7	0.00103	--	0.037	0.106	0.017	5.78e-10	0.08	0.037	0.012	0.00281	TLE1;RP11-154D17.1	TLE1	TLE1 [nearest(intronic) / Non_PAN_SMR <Pos_Exp (Blood)>] / RP11-154D17.1 [Non_PAN_SMR <Neg_Exp (THY)>]
EAS-meta-133	9:84258948 - 9:84358948	EAS/EUR	9:83986413:A:C	rs7038995	Secondary	TLE1(-212.2kb)	intergenic	NA	NA	88.3	0.00349	++	0.359	-0.044	0.006	4.21e-12	0.706	-0.016	0.007	0.0187	TLE1	TLE1	TLE1 [nearest(intergenic) / Non_PAN_SMR <Pos_Exp (Blood)>]
EAS-meta-132	9:84258948 - 9:84358948	EAS/EUR	9:84308948:A:G	rs2796441	Primary	TLE1(+4.7kb)	intergenic	0.88	2	0	0.419	--	0.388	0.075	0.006	4.49e-34	0.594	0.067	0.006	2.97e-25	TLE1;RP11-154D17.1	TLE1	TLE1 [nearest(intergenic) / Non_PAN_ABC (Brain); Non_PAN_SMR <Pos_Exp (Blood)>] / RP11-154D17.1 [Non_PAN_SMR <Neg_Exp (THY)>]
EUR-meta-124	9:84258948 - 9:84358948	EAS/EUR	9:84308948:A:G	rs2796441	Primary	TLE1(+4.7kb)	intergenic	0.86	2	0	0.419	--	0.388	0.075	0.006	4.49e-34	0.594	0.067	0.006	2.97e-25	TLE1	TLE1	TLE1 [nearest(intergenic) / Non_PAN_ABC (Brain); Non_PAN_SMR <Pos_Exp (Blood)>]
EUR-meta-125	9:96920220 - 9:97020220	EUR	9:97001682:A:C	rs55653563	Primary	ZNF169(-19.9kb)	intergenic	0.44	23	77	0.0372	++	0.112	-0.018	0.01	0.0687	0.267	-0.044	0.007	1.73e-09	ZNF169	ZNF169	ZNF169 [nearest(intergenic)]
EAS-meta-135	9:98175056 - 9:98275056	EAS	9:98278413:C:T	rs113154802	Primary	PTCH1	intronic	0.5	4	67.8	0.078	--	0.11	-0.056	0.01	1.62e-08	0.101	-0.03	0.011	0.00572	PTCH1;ERCC6L2;FANCC;LINC00092;LINC00476	PTCH1	PTCH1 [nearest(intronic) / Pan-related <PAN_ABC (PAN_Nasser)> / Non_PAN_ABC (Adp; LIV; MuSc; THY; ADR; Brain; SI; Co)] / ERCC6L2 [Pan-related <PAN_ABC (PAN_Nasser)> / Non_PAN_ABC (LIV; MuSc; ADR; Brain; SI; Co)] / FANCC [Pan-related <PAN_ABC (PAN_Nasser)> / Non_PAN_ABC (LIV; MuSc; ADR; Brain; SI; Co)] / LINC00092 [Pan-related <PAN_ABC (PAN_Nasser)> / Non_PAN_ABC (MuSc; ADR; Brain; SI; Co)] / LINC…
EAS-meta-136	9:129412901 - 9:129512901	EAS	9:129462687:A:C	rs10987422	Primary	LMX1B	3UTR	0.17	12	86.3	0.00692	++	0.132	-0.051	0.009	2.92e-08	0.578	-0.021	0.007	0.00179	LMX1B	LMX1B	LMX1B [nearest(3UTR)]
EAS-meta-137	9:136099229 - 9:136199229	EAS/EUR	9:136139265:C:A	rs657152	Primary	OBP2B(+54.6kb)	intergenic	0.09	26	0	0.886	++	0.42	0.044	0.006	5.89e-13	0.359	0.042	0.007	2.74e-10	ABO;LCN1P1;OBP2B	ABO	ABO [Pan-related <PAN_ABC (PAN_Nasser)> / Non_PAN_ABC (ADR; SI; Co); Non_PAN_SMR <Pos_Exp (Adp-Sub; Adp-Vis; LIV; MuSc; ADR; PIT; KID; Blood) / Neg_Exp (Brain; Co)>] / LCN1P1 [Non_PAN_SMR <Pos_Exp (THY)>] / OBP2B [nearest(intergenic)]
EUR-meta-126	9:136099229 - 9:136199229	EAS/EUR	9:136149229:T:C	rs505922	Primary	SURF6(-48.3kb)	intergenic	0.18	19	0	0.659	--	0.43	0.043	0.006	7.76e-13	0.337	0.047	0.007	3.65e-12	ABO;SURF6	ABO	ABO [Pan-related <PAN_ABC (PAN_Nasser)> / Non_PAN_ABC (ADR; SI; Co); Non_PAN_SMR <Pos_Exp (Blood) / Neg_Exp (Adp-Sub; Adp-Vis; MuSc; ADR; PIT)>] / SURF6 [nearest(intergenic)]
EAS-meta-139	9:139193334 - 9:139293334	EAS/EUR	9:139298593:A:G	rs1051957	Secondary	SDCCAG3	exonic	NA	NA	92	0.000416	++	0.212	-0.072	0.008	3.37e-21	0.422	-0.037	0.007	2.64e-08	SDCCAG3;C9orf163;CARD9;DNLZ;SEC16A	SDCCAG3	SDCCAG3 [nearest(exonic) / Non_PAN_ABC (LIV); Non_PAN_SMR <Neg_Exp (Adp-Sub; Co)>] / C9orf163 [Pan-related <PAN-SMR (Neg_Exp)>] / CARD9 [Non_PAN_ABC (LIV); Non_PAN_SMR <Neg_Exp (Blood)>] / DNLZ [Non_PAN_ABC (LIV); Non_PAN_SMR <Pos_Exp (THY; Brain; SI; Co; Blood)>] / SEC16A [Pan-related <PAN-SMR (Neg_Exp)> / Non_PAN_SMR <Neg_Exp (LIV; Blood)>]
EAS-meta-138	9:139193334 - 9:139293334	EAS/EUR	9:139246588:G:A	rs376993806	Primary	GPSM1	intronic	0.78	4	NA	NA	-?	0.12	-0.128	0.012	4.11e-26	NA	NA	NA	NA	GPSM1;C9orf163;SEC16A;CARD9;DNLZ	GPSM1	GPSM1 [nearest(intronic) / Non_PAN_SMR <Neg_Exp (MuSc; Brain)>] / C9orf163 [Pan-related <PAN-SMR (Neg_Exp)>] / SEC16A [Pan-related <PAN-SMR (Neg_Exp)> / Non_PAN_SMR <Neg_Exp (LIV; Blood)>] / CARD9 [Non_PAN_SMR <Neg_Exp (Blood)>] / DNLZ [Non_PAN_SMR <Pos_Exp (THY; Brain; SI; Co; Blood)>]
EUR-meta-128	9:139193334 - 9:139293334	EAS/EUR	9:139519000:G:C	rs7863715	Secondary	EGFL7(-34.3kb)	intergenic	NA	NA	94.2	3.27e-05	-+	0.218	-0.014	0.009	0.115	0.098	0.048	0.012	5.74e-05	CARD9;EGFL7;GPSM1;INPP5E;SEC16A	EGFL7	CARD9 [Non_PAN_SMR <Neg_Exp (Blood)>] / EGFL7 [nearest(intergenic)] / GPSM1 [Non_PAN_SMR <Neg_Exp (MuSc; THY; Brain)>] / INPP5E [Non_PAN_SMR <Neg_Exp (Brain; PIT; Blood)>] / SEC16A [Non_PAN_SMR <Neg_Exp (Blood)>]
EUR-meta-127	9:139193334 - 9:139293334	EAS/EUR	9:139241828:C:T	rs28533815	Primary	GPSM1	intronic	0.65	6	90.5	0.00121	--	0.086	-0.122	0.012	2.24e-23	0.251	-0.075	0.008	5.45e-21	GPSM1;CARD9;DKFZP434A062;DNLZ;SNAPC4	GPSM1	GPSM1 [nearest(intronic) / rs60980157 [VEP_High: R2 (EAS:EUR=0.96:0.93)] / Very-Strongly-Pan-related <PAN_ABC (beta; PAN_Nasser)> / Non_PAN_ABC (Adp; LIV; MuSc; THY; ADR; Brain; SI; Co); Non_PAN_SMR <Neg_Exp (MuSc; THY; Brain)>] / CARD9 [Pan-related <PAN_ABC (PAN_Nasser)> / Non_PAN_ABC (Adp; LIV; MuSc; ADR; Brain; Co); Non_PAN_SMR <Neg_Exp (Blood)>] / DKFZP434A062 [Very-Strongly-Pan-related <PAN_…
EAS-meta-140	10:12257894 - 10:12357894	EAS/EUR	10:12302357:C:T	rs10906111	Primary	CDC123(+9.8kb)	intergenic	0.83	4	96.4	1.6e-07	++	0.495	0.108	0.006	3.44e-68	0.29	0.059	0.007	7.48e-17	CDC123;NUDT5;CAMK1D;OPTN;SEC61A2	CDC123	CDC123 [nearest(intergenic) / Pan-related <PAN_ABC (PAN_Nasser)> / Non_PAN_SMR <Pos_Exp (Brain; Blood)>] / NUDT5 [Pan-related <PAN_ABC (PAN_Nasser)> / Non_PAN_SMR <Pos_Exp (MuSc; THY; Brain; PIT; Co; Blood)>] / CAMK1D [Pan-related <PAN_ABC (PAN_Nasser)>] / OPTN [Pan-related <PAN_ABC (PAN_Nasser)>] / SEC61A2 [Pan-related <PAN-SMR (Neg_Exp)> / Non_PAN_SMR <Pos_Exp (THY; Brain; PIT) / Neg_Exp (Adp-S…
EAS-meta-141	10:12257894 - 10:12357894	EAS/EUR	10:12536490:C:T	rs11257830	Secondary	CAMK1D	intronic	NA	NA	8.6	0.295	++	0.312	0.035	0.006	5.49e-08	0.024	0.012	0.021	0.566	CAMK1D;CDC123;RP11-186N15.3	CAMK1D	CAMK1D [nearest(intronic) / Non_PAN_SMR <Pos_Exp (Blood)>] / CDC123 [Non_PAN_SMR <Pos_Exp (Brain; Blood)>] / RP11-186N15.3 [Non_PAN_SMR <Pos_Exp (Blood)>]
EUR-meta-129	10:12257894 - 10:12357894	EAS/EUR	10:12307894:C:T	rs11257655	Primary	CDC123(+15.3kb)	intergenic	0.99	1	78.3	0.0317	++	0.486	0.107	0.006	8.45e-68	0.217	0.086	0.008	1.45e-28	CDC123;NUDT5;CAMK1D;OPTN	CDC123	CDC123 [nearest(intergenic) / Pan-related <PAN_ABC (PAN_Nasser)> / Non_PAN_SMR <Pos_Exp (Brain; Blood)>] / NUDT5 [Pan-related <PAN_ABC (PAN_Nasser)> / Non_PAN_SMR <Pos_Exp (Brain; Blood)>] / CAMK1D [Pan-related <PAN_ABC (PAN_Nasser)>] / OPTN [Pan-related <PAN_ABC (PAN_Nasser)>]
EAS-meta-142	10:23437778 - 10:23537778	EAS	10:23487778:G:A	rs77065181	Primary	PTF1A(+4.6kb)	intergenic	0.07	62	0	0.477	+-	0.048	0.092	0.014	1.33e-10	0	-0.291	0.538	0.589	PTF1A;ARMC3;C10orf67;MSRB2	PTF1A	PTF1A [nearest(intergenic) / Strongly-Pan-related <PAN_ABC (acinar; PAN_Nasser)>] / ARMC3 [Pan-related <PAN_ABC (PAN_Nasser)>] / C10orf67 [Pan-related <PAN_ABC (PAN_Nasser)> / Non_PAN_ABC (LIV; MuSc; Brain; Co)] / MSRB2 [Pan-related <PAN_ABC (PAN_Nasser)> / Non_PAN_ABC (Co)]
EAS-meta-143	10:63667113 - 10:63767113	EAS	10:63712602:G:GGTGT	10:63712602:GGTGT:G	Primary	ARID5B	intronic	0.49	11	NA	NA	+?	0.09	-0.071	0.012	6.77e-09	NA	NA	NA	NA	ARID5B	ARID5B	ARID5B [nearest(intronic)]
EAS-meta-144	10:64833316 - 10:64933316	EAS	10:64976133:T:TA	rs148928116	Primary	JMJD1C	intronic	0.09	32	NA	NA	+?	0.22	-0.055	0.007	2.46e-14	NA	NA	NA	NA	JMJD1C;JMJD1C-AS1;REEP3;NRBF2;CDK1	JMJD1C	JMJD1C [nearest(intronic) / rs41274074 [VEP_Medium: R2 (EAS:EUR=0.97:1)] / Very-Strongly-Pan-related <PAN_ABC (beta; alpha; acinar; ductal; PAN_Nasser)> / Non_PAN_ABC (Adp; LIV; MuSc; ADR; Brain; SI; Co)] / JMJD1C-AS1 [Very-Strongly-Pan-related <PAN_ABC (beta; alpha; acinar; ductal; PAN_Nasser)> / Non_PAN_ABC (Adp; LIV; MuSc; ADR; Brain; SI; Co)] / REEP3 [Very-Strongly-Pan-related <PAN_ABC (beta;…
EAS-meta-147	10:71271279 - 10:71371279	EAS/EUR	10:71296960:G:T	rs4746859	Secondary	TSPAN15(+29.5kb)	intergenic	NA	NA	60.3	0.113	--	0.451	-0.039	0.006	3.13e-10	0.093	-0.018	0.011	0.0955	AC016821.1;TSPAN15	TSPAN15	AC016821.1 [Non_PAN_SMR <Pos_Exp (Brain)>] / TSPAN15 [nearest(intergenic)]
EAS-meta-148	10:71271279 - 10:71371279	EAS/EUR	10:71443338:C:T	rs56019756	Secondary	C10orf35(+50kb)	intergenic	NA	NA	38.8	0.201	++	0.107	0.051	0.01	1.35e-07	0.178	0.035	0.008	3.26e-05	C10orf35;COL13A1;H2AFY2;AIFM2;SRGN	C10orf35	C10orf35 [nearest(intergenic) / Pan-related <PAN_ABC (ductal; PAN_Nasser)> / Non_PAN_ABC (LIV; SI; Co)] / COL13A1 [Pan-related <PAN_ABC (PAN_Nasser)> / Non_PAN_ABC (Co)] / H2AFY2 [Pan-related <PAN_ABC (PAN_Nasser)> / Non_PAN_ABC (SI)] / AIFM2 [Non_PAN_ABC (SI)] / SRGN [Non_PAN_ABC (SI)]
EAS-meta-146	10:71271279 - 10:71371279	EAS/EUR	10:71307920:G:A	rs297049	Secondary	NEUROG3(-23.5kb)	intergenic	NA	NA	0	0.81	--	0.125	-0.061	0.009	3.25e-11	0.068	-0.057	0.013	1.03e-05	AC016821.1;NEUROG3	NEUROG3	AC016821.1 [Non_PAN_SMR <Pos_Exp (Brain)>] / NEUROG3 [nearest(intergenic)]
EAS-meta-145	10:71271279 - 10:71371279	EAS/EUR	10:71326290:C:CAA	rs1679758537	Primary	NEUROG3(-5.2kb)	intergenic	0.35	14	NA	NA	-?	0.268	-0.053	0.008	1.64e-11	NA	NA	NA	NA	AC016821.1;NEUROG3	NEUROG3	AC016821.1 [Non_PAN_SMR <Pos_Exp (Brain)>] / NEUROG3 [nearest(intergenic)]
EUR-meta-130	10:71271279 - 10:71371279	EAS/EUR	10:71465359:T:G	rs2812539	Primary	C10orf35(+72kb)	intergenic	0.1	18	67.7	0.0784	++	0.114	-0.03	0.01	0.00243	0.298	-0.051	0.007	3.59e-13	C10orf35	C10orf35	C10orf35 [nearest(intergenic)]
EUR-meta-131	10:71271279 - 10:71371279	EAS/EUR	10:71319071:A:G	rs3847343	Secondary	NEUROG3(-12.4kb)	intergenic	NA	NA	58.7	0.12	++	0.255	-0.033	0.007	4.24e-06	0.389	-0.048	0.007	6.34e-13	NEUROG3	NEUROG3	NEUROG3 [nearest(intergenic)]
EAS-meta-149	10:77183813 - 10:77283813	EAS	10:77322908:A:G	rs10824317	Primary	C10orf11(-38.1kb)	intergenic	0.07	33	NA	NA	-?	0.493	0.045	0.007	1.38e-11	NA	NA	NA	NA	C10orf11;AC010997.6;ZNF503;ZNF503-AS2	C10orf11	C10orf11 [nearest(intergenic) / Pan-related <PAN-SMR (Neg_Exp)> / Non_PAN_SMR <Neg_Exp (Adp-Sub; Adp-Vis; THY; Co)>] / AC010997.6 [Non_PAN_SMR <Pos_Exp (Brain)>] / ZNF503 [Non_PAN_SMR <Pos_Exp (Blood)>] / ZNF503-AS2 [Non_PAN_SMR <Pos_Exp (Blood)>]
EAS-meta-150	10:80893841 - 10:80993841	EAS/EUR	10:80943841:G:A	rs703980	Primary	ZMIZ1	intronic	0.16	6	25.1	0.248	--	0.431	-0.059	0.006	2.13e-22	0.464	-0.07	0.006	8.06e-27	ZMIZ1	ZMIZ1	ZMIZ1 [nearest(intronic)]
EUR-meta-132	10:80893841 - 10:80993841	EAS/EUR	10:80952826:G:C	rs703972	Primary	ZMIZ1	intronic	0.12	8	65.6	0.0882	--	0.395	-0.055	0.006	4.37e-19	0.468	-0.07	0.006	5.77e-27	ZMIZ1	ZMIZ1	ZMIZ1 [nearest(intronic)]
EAS-meta-151	10:89719340 - 10:89819340	EAS	10:89769340:C:T	rs11202627	Primary	PTEN(+37.7kb)	intergenic	0.11	33	0	0.439	++	0.383	0.046	0.006	1.13e-13	0.15	0.038	0.009	2.56e-05	PTEN;ATAD1;MINPP1;PAPSS2;RNLS	PTEN	PTEN [nearest(intergenic) / Very-Strongly-Pan-related <PAN_ABC (beta; alpha; PAN_Nasser)> / Non_PAN_ABC (LIV; MuSc; Brain); Non_PAN_SMR <Pos_Exp (Brain)>] / ATAD1 [Very-Strongly-Pan-related <PAN_ABC (beta; alpha; PAN_Nasser)> / Non_PAN_ABC (MuSc; Brain)] / MINPP1 [Very-Strongly-Pan-related <PAN_ABC (beta; alpha; PAN_Nasser)> / Non_PAN_ABC (MuSc; Brain)] / PAPSS2 [Very-Strongly-Pan-related <PAN_AB…
EAS-meta-157	10:94410650 - 10:94510650	EAS/EUR	10:94233120:A:G	rs2249960	Secondary	IDE	intronic	NA	NA	94	4.43e-05	--	0.005	0.34	0.068	6.38e-07	0.134	0.058	0.01	9.43e-10	IDE;MARCH5;PPP1R3C;HECTD2;PCGF5	IDE	IDE [nearest(intronic) / Non_PAN_ABC (Brain); Non_PAN_SMR <Pos_Exp (Blood)>] / MARCH5 [Non_PAN_ABC (Brain); Non_PAN_SMR <Pos_Exp (Blood)>] / PPP1R3C [Pan-related <PAN_ABC (PAN_Nasser)> / Non_PAN_ABC (Adp; MuSc; Brain)] / HECTD2 [Non_PAN_ABC (Brain)] / PCGF5 [Non_PAN_ABC (Brain)]
EAS-meta-154	10:94410650 - 10:94510650	EAS/EUR	10:94485763:A:G	rs11187149	Secondary	HHEX(+30.4kb)	intergenic	NA	NA	0	0.446	--	0.205	0.116	0.007	1.79e-56	0.624	0.109	0.007	5.19e-61	HHEX;EIF2S2P3;IDE	HHEX	HHEX [nearest(intergenic) / Non_PAN_SMR <Pos_Exp (Blood)>] / EIF2S2P3 [Non_PAN_SMR <Pos_Exp (Adp-Sub; Blood) / Neg_Exp (THY; PIT; Co)>] / IDE [Non_PAN_SMR <Pos_Exp (Blood)>]
EAS-meta-152	10:94410650 - 10:94510650	EAS/EUR	10:94435673:A:G	rs35906730	Primary	HHEX(-12.3kb)	intergenic	0.24	4	NA	NA	-?	0.265	0.137	0.008	5.86e-73	NA	NA	NA	NA	HHEX;EIF2S2P3;IDE;MARK2P9	HHEX	HHEX [nearest(intergenic) / Non_PAN_SMR <Pos_Exp (Blood)>] / EIF2S2P3 [Non_PAN_SMR <Pos_Exp (Adp-Sub; Blood) / Neg_Exp (THY; PIT; Co)>] / IDE [Non_PAN_SMR <Pos_Exp (Blood)>] / MARK2P9 [Non_PAN_SMR <Pos_Exp (THY; Brain)>]
EAS-meta-153	10:94410650 - 10:94510650	EAS/EUR	10:94452672:C:G	rs191684511	Secondary	HHEX	intronic	NA	NA	NA	NA	-?	0.022	0.33	0.022	1.26e-48	NA	NA	NA	NA	HHEX;EIF2S2P3;EXOC6;IDE;MARK2P9	HHEX	HHEX [nearest(intronic) / Non_PAN_ABC (LIV); Non_PAN_SMR <Pos_Exp (Blood)>] / EIF2S2P3 [Non_PAN_SMR <Pos_Exp (Adp-Sub; Blood) / Neg_Exp (THY; PIT; Co)>] / EXOC6 [Non_PAN_ABC (Brain)] / IDE [Non_PAN_SMR <Pos_Exp (Blood)>] / MARK2P9 [Non_PAN_SMR <Pos_Exp (THY; Brain)>]
EAS-meta-155	10:94410650 - 10:94510650	EAS/EUR	10:94153010:T:C	rs368186827	Secondary	MARCH5(+39.3kb)	intergenic	NA	NA	NA	NA	-?	0.044	0.225	0.023	4.56e-23	NA	NA	NA	NA	MARCH5;EIF2S2P3;HHEX;IDE;MARK2P9	MARCH5	MARCH5 [nearest(intergenic) / Non_PAN_SMR <Pos_Exp (Blood)>] / EIF2S2P3 [Non_PAN_SMR <Pos_Exp (Adp-Sub; Blood) / Neg_Exp (THY; PIT; Co)>] / HHEX [Non_PAN_SMR <Pos_Exp (Blood)>] / IDE [Non_PAN_SMR <Pos_Exp (Blood)>] / MARK2P9 [Non_PAN_SMR <Pos_Exp (THY; Brain)>]
EAS-meta-156	10:94410650 - 10:94510650	EAS/EUR	10:94171281:A:ACT	rs563973487	Secondary	IDE(-40.2kb)	intergenic	NA	NA	NA	NA	-?	0.003	0.097	0.097	0.318	NA	NA	NA	NA	IDE;MARCH5;CPEB3;EIF2S2P3;HHEX	IDE	IDE [nearest(intergenic) / Non_PAN_SMR <Pos_Exp (Blood)>] / MARCH5 [Non_PAN_ABC (LIV); Non_PAN_SMR <Pos_Exp (Blood)>] / CPEB3 [Non_PAN_ABC (LIV)] / EIF2S2P3 [Non_PAN_SMR <Pos_Exp (Adp-Sub; Blood) / Neg_Exp (THY; PIT; Co)>] / HHEX [Non_PAN_SMR <Pos_Exp (Blood)>]
EAS-meta-158	10:94410650 - 10:94510650	EAS/EUR	10:94309794:G:A	rs561837820	Secondary	IDE	intronic	NA	NA	NA	NA	+?	0.007	0.664	0.083	1.29e-15	NA	NA	NA	NA	IDE;EIF2S2P3;HHEX;MARCH5;MARK2P9	IDE	IDE [nearest(intronic) / Non_PAN_SMR <Pos_Exp (Blood)>] / EIF2S2P3 [Non_PAN_SMR <Pos_Exp (Adp-Sub; Blood) / Neg_Exp (THY; PIT; Co)>] / HHEX [Non_PAN_SMR <Pos_Exp (Blood)>] / MARCH5 [Non_PAN_SMR <Pos_Exp (Blood)>] / MARK2P9 [Non_PAN_SMR <Pos_Exp (THY; Brain)>]
EAS-meta-159	10:94410650 - 10:94510650	EAS/EUR	10:94000863:G:A	rs538698072	Secondary	CPEB3	intronic	NA	NA	NA	NA	+?	0.011	0.397	0.039	7.42e-24	NA	NA	NA	NA	CPEB3;IDE;MARCH5;BTAF1;MARK2P9	MARCH5	CPEB3 [nearest(intronic) / Pan-related <PAN_ABC (PAN_Nasser)> / Non_PAN_ABC (Adp; LIV; MuSc; THY; ADR; Brain; SI)] / IDE [Pan-related <PAN_ABC (PAN_Nasser)> / Non_PAN_ABC (Adp; MuSc; ADR; Brain); Non_PAN_SMR <Pos_Exp (Blood)>] / MARCH5 [Strongly-Pan-related <PAN_ABC (acinar; PAN_Nasser)> / Non_PAN_ABC (Adp; LIV; MuSc; THY; ADR; Brain; SI); Non_PAN_SMR <Pos_Exp (Blood)>] / BTAF1 [Pan-related <PAN_…
EUR-meta-133	10:94410650 - 10:94510650	EAS/EUR	10:94460650:C:T	rs10882099	Primary	HHEX(+5.2kb)	intergenic	0.41	9	0	0.579	++	0.293	0.115	0.006	6.33e-70	0.588	0.11	0.006	7.73e-64	MARK2P9;EIF2S2P3;HHEX;KIF11	MARK2P9	MARK2P9 [Pan-related <PAN-SMR (Pos_Exp)> / Non_PAN_SMR <Pos_Exp (MuSc; THY; ADR; Brain)>] / EIF2S2P3 [Non_PAN_SMR <Pos_Exp (Adp-Sub) / Neg_Exp (THY; PIT; Co; Blood)>] / HHEX [nearest(intergenic)] / KIF11 [Non_PAN_SMR <Neg_Exp (Blood)>]
EAS-meta-160	10:98938759 - 10:99038759	EAS	10:99013312:G:A	rs10882883	Primary	ARHGAP19:ARHGAP19-SLIT1	intronic:intronic	0.11	22	43.2	0.184	++	0.311	0.044	0.006	1.97e-11	0.408	0.031	0.006	1.32e-06	FRAT1;ARHGAP19;FRAT2;ARHGAP19-SLIT1;RRP12	FRAT1	FRAT1 [Very-Strongly-Pan-related <PAN_ABC (beta; acinar; ductal; PAN_Nasser)> / Non_PAN_ABC (Adp; LIV; MuSc; THY; ADR; Brain; SI; Co); Non_PAN_SMR <Pos_Exp (Brain)>] / ARHGAP19 [nearest(intronic:intronic) / Pan-related <PAN_ABC (PAN_Nasser)> / Non_PAN_ABC (Adp; LIV; MuSc; THY; ADR; Brain; SI; Co); Non_PAN_SMR <Pos_Exp (Blood) / Neg_Exp (THY)>] / FRAT2 [Very-Strongly-Pan-related <PAN_ABC (beta; ac…
EAS-meta-161	10:112628657 - 10:112728657	EAS	10:112773661:A:G	rs12244153	Primary	SHOC2	downstream	0.08	16	81.3	0.0208	+-	0.298	-0.044	0.007	1.15e-11	0.027	0.005	0.02	0.796	SHOC2;HABP2;VTI1A;XPNPEP1;ZDHHC6	SHOC2	SHOC2 [nearest(downstream) / Very-Strongly-Pan-related <PAN_ABC (beta; alpha; acinar; ductal; PAN_Nasser)> / Non_PAN_ABC (Adp; LIV; MuSc; THY; ADR; Brain; SI; Co)] / HABP2 [Strongly-Pan-related <PAN_ABC (acinar; ductal)> / Non_PAN_ABC (MuSc)] / VTI1A [Strongly-Pan-related <PAN_ABC (acinar; ductal; PAN_Nasser)> / Non_PAN_ABC (Adp; LIV; MuSc; THY; ADR; Brain; Co)] / XPNPEP1 [Very-Strongly-Pan-relat…
EAS-meta-162	10:114708349 - 10:114808349	EAS/EUR	10:114754088:T:C	rs7901695	Primary	TCF7L2	intronic	0.5	4	0	0.394	--	0.037	0.27	0.015	1.08e-68	0.308	0.285	0.007	< 1.0e-300	TCF7L2;RP11-57H14.2	TCF7L2	TCF7L2 [nearest(intronic) / Non_PAN_SMR <Pos_Exp (Blood)>] / RP11-57H14.2 [Non_PAN_SMR <Pos_Exp (Blood)>]
EAS-meta-163	10:114708349 - 10:114808349	EAS/EUR	10:114792850:GT:G	rs200225336	Secondary	TCF7L2	intronic	NA	NA	NA	NA	+?	0.005	0.402	0.072	2.68e-08	NA	NA	NA	NA	TCF7L2;RP11-57H14.2	TCF7L2	TCF7L2 [nearest(intronic) / Non_PAN_SMR <Pos_Exp (Blood)>] / RP11-57H14.2 [Non_PAN_SMR <Pos_Exp (Blood)>]
EUR-meta-143	10:114708349 - 10:114808349	EAS/EUR	10:114597109:G:A	rs545572	Secondary	VTI1A(+18.6kb)	intergenic	NA	NA	97.7	6.71e-11	+-	0.143	0.007	0.011	0.51	0.393	-0.076	0.007	4.24e-29	VTI1A	VTI1A	VTI1A [nearest(intergenic)]
EUR-meta-134	10:114708349 - 10:114808349	EAS/EUR	10:114758349:C:T	rs7903146	Primary	TCF7L2	intronic	1	1	86.5	0.00654	++	0.037	0.268	0.015	9.55e-68	0.291	0.314	0.007	< 1.0e-300	TCF7L2	TCF7L2	TCF7L2 [nearest(intronic)]
EUR-meta-138	10:114708349 - 10:114808349	EAS/EUR	10:115016408:T:C	rs12257761	Secondary	TCF7L2(+89kb)	intergenic	NA	NA	84.1	0.0121	-+	0.355	0.017	0.007	0.0108	0.888	-0.014	0.01	0.175	TCF7L2	TCF7L2	TCF7L2 [nearest(intergenic)]
EUR-meta-139	10:114708349 - 10:114808349	EAS/EUR	10:114707340:G:C	rs66500369	Secondary	TCF7L2	upstream	NA	NA	0.8	0.315	--	0.066	-0.013	0.012	0.311	0.289	-0.027	0.007	0.000126	TCF7L2;ACSL5;HABP2;VTI1A;ZDHHC6	TCF7L2	TCF7L2 [nearest(upstream) / Pan-related <PAN_ABC (PAN_Nasser)> / Non_PAN_ABC (LIV; MuSc; ADR; Brain; SI; Co)] / ACSL5 [Pan-related <PAN_ABC (PAN_Nasser)>] / HABP2 [Pan-related <PAN_ABC (PAN_Nasser)> / Non_PAN_ABC (SI; Co)] / VTI1A [Pan-related <PAN_ABC (PAN_Nasser)> / Non_PAN_ABC (Brain; Co)] / ZDHHC6 [Pan-related <PAN_ABC (PAN_Nasser)> / Non_PAN_ABC (Brain; Co)]
EUR-meta-141	10:114708349 - 10:114808349	EAS/EUR	10:114552267:G:A	rs10787461	Secondary	VTI1A	intronic	NA	NA	0	0.687	-+	0.498	-0.001	0.007	0.93	0.376	0.003	0.007	0.628	VTI1A	VTI1A	VTI1A [nearest(intronic)]
EUR-meta-140	10:114708349 - 10:114808349	EAS/EUR	10:114869792:G:A	rs7084875	Secondary	TCF7L2	intronic	NA	NA	0	0.93	++	0.02	0.069	0.039	0.0748	0.201	0.073	0.008	4.92e-19	TCF7L2	TCF7L2	TCF7L2 [nearest(intronic)]
EUR-meta-135	10:114708349 - 10:114808349	EAS/EUR	10:115136540:G:A	rs72830009	Secondary	HABP2(-174.1kb)	intergenic	NA	NA	NA	NA	?-	NA	NA	NA	NA	0.971	-0.018	0.02	0.378	HABP2	HABP2	HABP2 [nearest(intergenic)]
EUR-meta-136	10:114708349 - 10:114808349	EAS/EUR	10:115103193:G:A	rs12255625	Secondary	TCF7L2(+175.8kb)	intergenic	NA	NA	NA	NA	?-	NA	NA	NA	NA	0.927	-0.004	0.013	0.733	TCF7L2	TCF7L2	TCF7L2 [nearest(intergenic)]
EUR-meta-137	10:114708349 - 10:114808349	EAS/EUR	10:115555274:C:T	rs149465629	Secondary	PLEKHS1(+12.1kb)	intergenic	NA	NA	NA	NA	?+	NA	NA	NA	NA	0.008	0.09	0.038	0.0193	PLEKHS1	PLEKHS1	PLEKHS1 [nearest(intergenic)]
EUR-meta-142	10:114708349 - 10:114808349	EAS/EUR	10:114104950:G:C	rs117517685	Secondary	ACSL5(-28.8kb)	intergenic	NA	NA	NA	NA	?-	NA	NA	NA	NA	0.036	-0.027	0.018	0.123	ACSL5	ACSL5	ACSL5 [nearest(intergenic)]
EUR-meta-144	10:114708349 - 10:114808349	EAS/EUR	10:114111493:C:T	rs139929056	Secondary	ACSL5(-22.3kb)	intergenic	NA	NA	NA	NA	?-	NA	NA	NA	NA	0.014	-0.085	0.031	0.00532	ACSL5	ACSL5	ACSL5 [nearest(intergenic)]
EUR-meta-145	10:114708349 - 10:114808349	EAS/EUR	10:114603922:G:A	rs185210962	Secondary	VTI1A(+25.4kb)	intergenic	NA	NA	NA	NA	?+	NA	NA	NA	NA	0.988	0.243	0.034	1.7e-12	TCF7L2;VTI1A	VTI1A	TCF7L2 [Non_PAN_ABC (SI)] / VTI1A [nearest(intergenic)]
EAS-meta-164	10:122865345 - 10:122965345	EAS	10:122931652:G:T	rs1873449	Primary	WDR11(+262.6kb)	intergenic	0.18	13	0	0.842	--	0.302	-0.059	0.007	2.5e-19	0.022	-0.064	0.022	0.00399	WDR11;FGFR2;WDR11-AS1	WDR11	WDR11 [nearest(intergenic) / Non_PAN_ABC (Co)] / FGFR2 [Non_PAN_ABC (Co)] / WDR11-AS1 [Non_PAN_ABC (Co)]
EAS-meta-165	10:122865345 - 10:122965345	EAS	10:122866410:AT:A	rs34404152	Secondary	WDR11(+197.4kb)	intergenic	NA	NA	NA	NA	-?	0.186	-0.054	0.009	3.99e-10	NA	NA	NA	NA	WDR11	WDR11	WDR11 [nearest(intergenic)]
EAS-meta-166	10:124122912 - 10:124222912	EAS/EUR	10:124172912:G:A	rs7908662	Primary	PLEKHA1	intronic	0.11	33	0	0.524	++	0.398	0.042	0.007	2.1e-10	0.512	0.048	0.006	3.96e-14	PLEKHA1;CUZD1;HTRA1;WDR11;WDR11-AS1	PLEKHA1	PLEKHA1 [nearest(intronic) / Very-Strongly-Pan-related <PAN_ABC (beta; alpha; acinar; ductal; PAN_Nasser)> / Non_PAN_ABC (LIV; MuSc; THY; ADR; Brain; SI; Co); Non_PAN_SMR <Neg_Exp (Adp-Sub; Adp-Vis; Blood)>] / CUZD1 [Strongly-Pan-related <PAN_ABC (acinar)>] / HTRA1 [Very-Strongly-Pan-related <PAN_ABC (beta; alpha; ductal; PAN_Nasser)> / Non_PAN_ABC (LIV; MuSc; THY; Brain)] / WDR11 [Very-Strongly-…
EUR-meta-146	10:124122912 - 10:124222912	EAS/EUR	10:124193181:G:T	rs2280141	Primary	PLEKHA1(+1.3kb)	intergenic	0.14	24	40.9	0.193	++	0.392	0.037	0.006	1.2e-09	0.512	0.049	0.006	1.91e-14	PLEKHA1;CUZD1;HTRA1;WDR11;WDR11-AS1	PLEKHA1	PLEKHA1 [nearest(intergenic) / Very-Strongly-Pan-related <PAN_ABC (beta; alpha; acinar; ductal; PAN_Nasser)> / Non_PAN_ABC (LIV; MuSc; THY; ADR; Brain; SI; Co); Non_PAN_SMR <Pos_Exp (MuSc) / Neg_Exp (Adp-Sub; Adp-Vis; Blood)>] / CUZD1 [Strongly-Pan-related <PAN_ABC (acinar)>] / HTRA1 [Very-Strongly-Pan-related <PAN_ABC (beta; alpha; ductal; PAN_Nasser)> / Non_PAN_ABC (LIV; MuSc; THY; Brain)] / WD…
EAS-meta-167	10:125151772 - 10:125251772	EAS	10:125201772:A:G	rs11248529	Primary	GPR26(-224.1kb)	intergenic	0.51	26	59	0.118	++	0.336	-0.038	0.006	5.8e-09	0.051	-0.012	0.015	0.404	GPR26	GPR26	GPR26 [nearest(intergenic)]
EAS-meta-169	11:2808546 - 11:2908546	EAS/EUR	11:2857194:A:C	rs2237895	Secondary	KCNQ1	intronic	NA	NA	99.2	6.93e-30	--	0.344	0.194	0.006	2.56e-200	0.427	0.089	0.007	1.15e-41	KCNQ1;CDKN1C;KCNQ1OT1	KCNQ1	KCNQ1 [nearest(intronic) / Non_PAN_SMR <Neg_Exp (Blood)>] / CDKN1C [Non_PAN_SMR <Neg_Exp (Blood)>] / KCNQ1OT1 [Non_PAN_SMR <Pos_Exp (THY)>]
EAS-meta-172	11:2808546 - 11:2908546	EAS/EUR	11:2591048:T:A	rs6578274	Secondary	KCNQ1	intronic	NA	NA	95.8	1.07e-06	+-	0.465	0.026	0.007	0.000103	0.747	-0.023	0.008	0.0022	KCNQ1;KCNQ1OT1	KCNQ1	KCNQ1 [nearest(intronic) / Non_PAN_SMR <Neg_Exp (Blood)>] / KCNQ1OT1 [Non_PAN_SMR <Pos_Exp (THY)>]
EAS-meta-179	11:2808546 - 11:2908546	EAS/EUR	11:2375458:G:A	rs79495865	Secondary	CD81(-21.9kb)	intergenic	NA	NA	94.2	3.31e-05	+-	0.168	0.042	0.009	2.89e-06	0.259	-0.009	0.008	0.288	TH;CD81;KCNQ1;KCNQ1OT1	TH	TH [Pan-related <PAN-SMR (Neg_Exp)> / Non_PAN_SMR <Pos_Exp (Brain)>] / CD81 [nearest(intergenic)] / KCNQ1 [Non_PAN_SMR <Neg_Exp (Blood)>] / KCNQ1OT1 [Non_PAN_SMR <Pos_Exp (THY)>]
EAS-meta-183	11:2808546 - 11:2908546	EAS/EUR	11:2203154:T:C	rs11043003	Secondary	TH(+10kb)	intergenic	NA	NA	93.2	0.000129	--	0.081	0.097	0.011	1.71e-18	0.24	0.046	0.008	2.07e-09	INS;INS-IGF2;TH;IGF2;TSPAN32	INS	INS [Very-Strongly-Pan-related <PAN_ABC (beta; ductal)>] / INS-IGF2 [Very-Strongly-Pan-related <PAN_ABC (beta)>] / TH [nearest(intergenic) / Pan-related <PAN-SMR (Neg_Exp)> / Non_PAN_ABC (Brain); Non_PAN_SMR <Pos_Exp (Brain)>] / IGF2 [Non_PAN_ABC (Brain)] / TSPAN32 [Non_PAN_ABC (Brain)]
EAS-meta-181	11:2808546 - 11:2908546	EAS/EUR	11:2495515:G:A	rs3815064	Secondary	KCNQ1	intronic	NA	NA	88	0.00383	--	0.335	-0.042	0.006	9.58e-11	0.347	-0.015	0.007	0.0319	KCNQ1;KCNQ1OT1	KCNQ1	KCNQ1 [nearest(intronic) / Non_PAN_SMR <Neg_Exp (Blood)>] / KCNQ1OT1 [Non_PAN_SMR <Pos_Exp (THY)>]
EAS-meta-168	11:2808546 - 11:2908546	EAS/EUR	11:2858546:C:T	rs2237897	Primary	KCNQ1	intronic	1	1	85.4	0.00894	--	0.365	-0.239	0.007	3.51e-289	0.046	-0.192	0.017	6.79e-31	KCNQ1;CDKN1C;KCNQ1OT1	KCNQ1	KCNQ1 [nearest(intronic) / Non_PAN_SMR <Neg_Exp (Blood)>] / CDKN1C [Non_PAN_SMR <Neg_Exp (Blood)>] / KCNQ1OT1 [Non_PAN_SMR <Pos_Exp (THY)>]
EAS-meta-176	11:2808546 - 11:2908546	EAS/EUR	11:1997115:C:T	rs77345512	Secondary	MRPL23	intronic	NA	NA	71	0.0633	+-	0.131	0.033	0.01	0.00078	0.013	-0.028	0.032	0.372	MRPL23;TH	MRPL23	MRPL23 [nearest(intronic)] / TH [Pan-related <PAN-SMR (Neg_Exp)> / Non_PAN_SMR <Pos_Exp (Brain)>]
EAS-meta-177	11:2808546 - 11:2908546	EAS/EUR	11:2799679:T:C	rs2237884	Secondary	KCNQ1	intronic	NA	NA	59.7	0.115	++	0.402	-0.024	0.006	0.000246	0.27	-0.039	0.007	1.2e-07	CDKN1C;KCNQ1;KCNQ1OT1	CDKN1C	CDKN1C [Very-Strongly-Pan-related <PAN_ABC (beta; alpha; PAN_Nasser)> / Non_PAN_SMR <Neg_Exp (Blood)>] / KCNQ1 [nearest(intronic) / Non_PAN_SMR <Neg_Exp (Blood)>] / KCNQ1OT1 [Pan-related <PAN_ABC (PAN_Nasser)> / Non_PAN_SMR <Pos_Exp (THY)>]
EAS-meta-170	11:2808546 - 11:2908546	EAS/EUR	11:2762998:C:T	rs112908040	Secondary	KCNQ1	intronic	NA	NA	0	0.484	-+	0.121	-0.002	0.01	0.829	0.042	0.012	0.017	0.492	KCNQ1;CDKN1C;KCNQ1OT1	KCNQ1	KCNQ1 [nearest(intronic) / Non_PAN_SMR <Neg_Exp (Blood)>] / CDKN1C [Non_PAN_SMR <Neg_Exp (Blood)>] / KCNQ1OT1 [Non_PAN_SMR <Pos_Exp (THY)>]
EAS-meta-175	11:2808546 - 11:2908546	EAS/EUR	11:2389710:C:T	rs2521247	Secondary	CD81(-7.7kb)	intergenic	NA	NA	0	0.704	++	0.246	0.028	0.007	0.000151	0.755	0.024	0.008	0.00193	TH;CD81;KCNQ1;KCNQ1OT1	TH	TH [Pan-related <PAN-SMR (Neg_Exp)> / Non_PAN_SMR <Pos_Exp (Brain)>] / CD81 [nearest(intergenic)] / KCNQ1 [Non_PAN_SMR <Neg_Exp (Blood)>] / KCNQ1OT1 [Non_PAN_SMR <Pos_Exp (THY)>]
EAS-meta-182	11:2808546 - 11:2908546	EAS/EUR	11:2288412:C:T	rs10831668	Secondary	ASCL2(-1.3kb)	intergenic	NA	NA	0	0.757	++	0.045	0.091	0.015	1.17e-09	0.017	0.1	0.026	8.94e-05	ASCL2;TH;INS	ASCL2	ASCL2 [nearest(intergenic) / Non_PAN_ABC (LIV; SI)] / TH [Pan-related <PAN-SMR (Neg_Exp)> / Non_PAN_SMR <Pos_Exp (Brain)>] / INS [NA]
EAS-meta-173	11:2808546 - 11:2908546	EAS/EUR	11:2548798:G:A	rs532013558	Secondary	KCNQ1	intronic	NA	NA	NA	NA	+?	0.008	0.079	0.055	0.148	NA	NA	NA	NA	KCNQ1;CDKN1C;KCNQ1OT1	KCNQ1	KCNQ1 [nearest(intronic) / Non_PAN_ABC (SI); Non_PAN_SMR <Neg_Exp (Blood)>] / CDKN1C [Non_PAN_ABC (SI)] / KCNQ1OT1 [Non_PAN_SMR <Pos_Exp (THY)>]
EAS-meta-178	11:2808546 - 11:2908546	EAS/EUR	11:2650333:AT:A	rs149468188	Secondary	KCNQ1	intronic	NA	NA	NA	NA	-?	0.078	-0.111	0.012	6.47e-20	NA	NA	NA	NA	KCNQ1;CDKN1C;KCNQ1OT1;KCNQ1-AS1;KCNQ1DN	KCNQ1	KCNQ1 [nearest(intronic) / Non_PAN_SMR <Neg_Exp (Blood)>] / CDKN1C [Non_PAN_ABC (LIV; Brain); Non_PAN_SMR <Neg_Exp (Blood)>] / KCNQ1OT1 [Non_PAN_ABC (LIV; Brain); Non_PAN_SMR <Pos_Exp (THY)>] / KCNQ1-AS1 [Non_PAN_ABC (Brain)] / KCNQ1DN [Non_PAN_ABC (Brain)]
EAS-meta-180	11:2808546 - 11:2908546	EAS/EUR	11:2848357:C:T	rs138205568	Secondary	KCNQ1	intronic	NA	NA	NA	NA	-?	0.025	-0.267	0.025	2.17e-26	NA	NA	NA	NA	CDKN1C;KCNQ1;KCNQ1OT1	KCNQ1	CDKN1C [Pan-related <PAN_ABC (PAN_Nasser)> / Non_PAN_SMR <Neg_Exp (Blood)>] / KCNQ1 [nearest(intronic) / Non_PAN_SMR <Neg_Exp (Blood)>] / KCNQ1OT1 [Pan-related <PAN_ABC (PAN_Nasser)> / Non_PAN_SMR <Pos_Exp (THY)>]
EAS-meta-184	11:2808546 - 11:2908546	EAS/EUR	11:2684662:G:A	rs2073957	Secondary	KCNQ1	intronic	NA	NA	NA	NA	-?	0.033	-0.159	0.023	3.61e-12	NA	NA	NA	NA	KCNQ1;CDKN1C;KCNQ1OT1	KCNQ1	KCNQ1 [nearest(intronic) / Non_PAN_SMR <Neg_Exp (Blood)>] / CDKN1C [Non_PAN_SMR <Neg_Exp (Blood)>] / KCNQ1OT1 [Non_PAN_SMR <Pos_Exp (THY)>]
EAS-meta-171	11:2808546 - 11:2908546	EAS/EUR	11:2970989:C:T	rs183753947	Secondary	NAP1L4	intronic	NA	NA	NA	NA	-?	0.018	-0.183	0.031	2.98e-09	NA	NA	NA	NA	NAP1L4;CDKN1C	NAP1L4	NAP1L4 [nearest(intronic)] / CDKN1C [Non_PAN_SMR <Neg_Exp (Blood)>]
EAS-meta-174	11:2808546 - 11:2908546	EAS/EUR	11:2888475:G:C	rs180711363	Secondary	CDKN1C(-16kb)	intergenic	NA	NA	NA	NA	-?	0.008	-0.124	0.037	0.000795	NA	NA	NA	NA	CDKN1C;KCNQ1;KCNQ1-AS1;KCNQ1DN;KCNQ1OT1	CDKN1C	CDKN1C [nearest(intergenic) / Non_PAN_SMR <Neg_Exp (Blood)>] / KCNQ1 [Non_PAN_SMR <Neg_Exp (Blood)>] / KCNQ1-AS1 [Non_PAN_ABC (LIV; Brain; SI; Co)] / KCNQ1DN [Non_PAN_ABC (Brain)] / KCNQ1OT1 [Non_PAN_SMR <Pos_Exp (THY)>]
EUR-meta-147	11:2808546 - 11:2908546	EAS/EUR	11:2857194:A:C	rs2237895	Primary	KCNQ1	intronic	1	1	99.2	6.93e-30	--	0.344	0.194	0.006	2.56e-200	0.427	0.089	0.007	1.15e-41	KCNQ1;KCNQ1OT1	KCNQ1	KCNQ1 [nearest(intronic)] / KCNQ1OT1 [Non_PAN_SMR <Neg_Exp (Brain)>]
EUR-meta-148	11:2808546 - 11:2908546	EAS/EUR	11:2691471:G:A	rs231362	Secondary	KCNQ1	intronic	NA	NA	86.7	0.00619	--	0.104	-0.084	0.01	2.63e-17	0.48	-0.052	0.007	5.84e-15	KCNQ1;KCNQ1OT1	KCNQ1	KCNQ1 [nearest(intronic)] / KCNQ1OT1 [Non_PAN_SMR <Neg_Exp (Brain)>]
EUR-meta-149	11:2808546 - 11:2908546	EAS/EUR	11:2858546:C:T	rs2237897	Secondary	KCNQ1	intronic	NA	NA	85.4	0.00894	--	0.365	-0.239	0.007	3.51e-289	0.046	-0.192	0.017	6.79e-31	KCNQ1;CDKN1C;KCNQ1OT1	KCNQ1	KCNQ1 [nearest(intronic)] / CDKN1C [NA] / KCNQ1OT1 [Non_PAN_SMR <Neg_Exp (Brain)>]
EUR-meta-152	11:2808546 - 11:2908546	EAS/EUR	11:1702929:A:G	rs10838787	Secondary	KRTAP5-6(-15.5kb)	intergenic	NA	NA	83.5	0.0138	++	0.2	-0.009	0.008	0.273	0.578	-0.036	0.007	1.33e-07	KRTAP5-6;LSP1;SYT8;TNNI2;FAM99B	KRTAP5-6	KRTAP5-6 [nearest(intergenic) / Pan-related <PAN_ABC (PAN_Nasser)> / Non_PAN_ABC (ADR; Co)] / LSP1 [Pan-related <PAN_ABC (PAN_Nasser)>] / SYT8 [Pan-related <PAN_ABC (PAN_Nasser)> / Non_PAN_ABC (LIV; Brain)] / TNNI2 [Pan-related <PAN_ABC (PAN_Nasser)>] / FAM99B [Non_PAN_ABC (LIV)]
EUR-meta-151	11:2808546 - 11:2908546	EAS/EUR	11:2197286:G:A	rs4929965	Secondary	TH(+4.2kb)	intergenic	NA	NA	78.2	0.0321	++	0.08	0.095	0.011	1.91e-17	0.381	0.067	0.007	9.67e-23	INS;INS-IGF2;TH	INS	INS [Very-Strongly-Pan-related <PAN_ABC (beta; ductal)>] / INS-IGF2 [Very-Strongly-Pan-related <PAN_ABC (beta)>] / TH [nearest(intergenic) / Pan-related <PAN-SMR (Neg_Exp)>]
EUR-meta-150	11:2808546 - 11:2908546	EAS/EUR	11:2579163:A:G	rs2283164	Secondary	KCNQ1	intronic	NA	NA	45.5	0.175	++	0.047	-0.1	0.016	5.26e-10	0.053	-0.07	0.015	3.55e-06	KCNQ1;KCNQ1OT1	KCNQ1	KCNQ1 [nearest(intronic)] / KCNQ1OT1 [Non_PAN_SMR <Neg_Exp (Brain)>]
EUR-meta-153	11:14713828 - 11:14813828	EUR	11:14763828:C:A	rs141521721	Primary	PDE3B	intronic	0.38	19	NA	NA	?+	NA	NA	NA	NA	0.023	0.121	0.021	1.39e-08	PDE3B	PDE3B	PDE3B [nearest(intronic)]
EAS-meta-185	11:17358630 - 11:17458630	EAS/EUR	11:17411821:T:C	rs2074314	Primary	KCNJ11	upstream	0.25	8	0	0.799	--	0.375	0.067	0.006	4.55e-27	0.367	0.069	0.007	1.31e-25	KCNJ11;ABCC8;NCR3LG1;NUCB2;PIK3C2A	KCNJ11	KCNJ11 [nearest(upstream) / rs5219 [VEP_High: R2 (EAS:EUR=1:0.98)] / Very-Strongly-Pan-related <PAN_ABC (beta; alpha; PAN_Nasser)> / Non_PAN_ABC (LIV; MuSc; THY; Co); Non_PAN_SMR <Pos_Exp (Blood) / Neg_Exp (THY; Brain)>] / ABCC8 [rs757110 [VEP_Low: R2 (EAS:EUR=0.88:0.95)] / Very-Strongly-Pan-related <PAN_ABC (beta; alpha; acinar)> / Non_PAN_ABC (LIV)] / NCR3LG1 [Very-Strongly-Pan-related <PAN_ABC…
EUR-meta-154	11:17358630 - 11:17458630	EAS/EUR	11:17408630:T:C	rs5215	Primary	KCNJ11	exonic	0.7	6	0	0.627	--	0.375	0.066	0.006	9.6e-27	0.373	0.071	0.007	9.85e-27	KCNJ11;ABCC8;NCR3LG1;NUCB2;PIK3C2A	KCNJ11	KCNJ11 [nearest(exonic) / rs5219 [VEP_High: R2 (EAS:EUR=1:1)] / Very-Strongly-Pan-related <PAN_ABC (beta; alpha; PAN_Nasser)> / Non_PAN_ABC (LIV; MuSc; THY; Co); Non_PAN_SMR <Pos_Exp (Blood) / Neg_Exp (Brain)>] / ABCC8 [rs757110 [VEP_Low: R2 (EAS:EUR=0.88:0.93)] / Very-Strongly-Pan-related <PAN_ABC (beta; alpha; acinar)> / Non_PAN_ABC (LIV)] / NCR3LG1 [Very-Strongly-Pan-related <PAN_ABC (beta; PA…
EAS-meta-186	11:27640399 - 11:27740399	EAS	11:27739407:AGT:A	rs56730757	Primary	BDNF	intronic	0.1	24	NA	NA	-?	0.471	-0.043	0.007	1.1e-10	NA	NA	NA	NA	BDNF;ANO3;BDNF-AS;LUZP2;MUC15	BDNF	BDNF [nearest(intronic) / Pan-related <PAN_ABC (PAN_Nasser)> / Non_PAN_ABC (Brain)] / ANO3 [Non_PAN_ABC (Brain)] / BDNF-AS [Non_PAN_ABC (Brain)] / LUZP2 [Non_PAN_ABC (Brain)] / MUC15 [Non_PAN_ABC (Brain)]
EUR-meta-155	11:32877778 - 11:32977778	EUR	11:32927778:G:T	rs145678014	Primary	QSER1	intronic	0.72	10	NA	NA	?-	NA	NA	NA	NA	0.043	-0.105	0.016	1.4e-10	QSER1;EIF3M;CSTF3;DCDC1;DNAJC24	QSER1	QSER1 [nearest(intronic) / rs62618693 [VEP_Medium: R2 (EAS:EUR=ND:0.98)]] / EIF3M [Pan-related <PAN_ABC (alpha; PAN_Nasser)> / Non_PAN_ABC (Adp; MuSc; ADR; Brain; SI; Co)] / CSTF3 [Non_PAN_ABC (MuSc)] / DCDC1 [Non_PAN_ABC (SI)] / DNAJC24 [Non_PAN_ABC (SI)]
EAS-meta-187	11:34900920 - 11:35000920	EAS/EUR	11:35437863:G:C	rs2421897	Primary	SLC1A2	intronic	0.28	8	76.6	0.0386	-+	0.13	-0.055	0.009	1.27e-09	0.013	0.007	0.029	0.794	SLC1A2;PAMR1	SLC1A2	SLC1A2 [nearest(intronic) / Non_PAN_ABC (Brain)] / PAMR1 [Pan-related <PAN_ABC (PAN_Nasser)>]
EUR-meta-156	11:34900920 - 11:35000920	EAS/EUR	11:34982148:A:C	rs2767036	Primary	PDHX	intronic	0.02	286	45.4	0.176	--	0.285	0.026	0.007	0.000209	0.291	0.039	0.007	2.94e-08	APIP;PDHX;CD59;COMMD9;FBXO3-AS1	PDHX	APIP [Very-Strongly-Pan-related <PAN_ABC (beta; alpha; acinar; ductal; PAN_Nasser) / PAN-SMR (Pos_Exp)> / Non_PAN_ABC (Adp; LIV; MuSc; THY; ADR; Brain; SI; Co); Non_PAN_SMR <Pos_Exp (Adp-Vis; LIV; MuSc; ADR)>] / PDHX [nearest(intronic) / Very-Strongly-Pan-related <PAN_ABC (beta; alpha; acinar; ductal; PAN_Nasser)> / Non_PAN_ABC (Adp; LIV; MuSc; THY; ADR; Brain; SI; Co)] / CD59 [Strongly-Pan-relat…
EUR-meta-157	11:43828459 - 11:43928459	EUR	11:43877934:C:A	rs1061810	Primary	HSD17B12	3UTR	0.11	62	92.9	0.000184	++	0.211	0.012	0.007	0.101	0.287	0.05	0.007	8.31e-13	HSD17B12;RP11-613D13.5;ALKBH3	HSD17B12	HSD17B12 [nearest(3UTR) / rs11555762 [VEP_Low: R2 (EAS:EUR=1:0.94)] / Pan-related <PAN-SMR (Pos_Exp)> / Non_PAN_ABC (Brain); Non_PAN_SMR <Pos_Exp (Adp-Sub; Adp-Vis; MuSc; THY; Brain; PIT; SI; Co; Blood) / Neg_Exp (LIV; ADR)>] / RP11-613D13.5 [Pan-related <PAN-SMR (Pos_Exp)> / Non_PAN_SMR <Pos_Exp (Adp-Sub; Adp-Vis; THY; Co)>] / ALKBH3 [Non_PAN_ABC (Adp)]
EUR-meta-158	11:45808584 - 11:45908584	EUR	11:45858584:G:A	rs12419690	Primary	CRY2(-10.1kb)	intergenic	0.18	23	1.4	0.314	--	0.232	-0.025	0.007	0.000432	0.552	-0.035	0.006	3.89e-08	CRY2;MAPK8IP1;SLC35C1;C11orf94	CRY2	CRY2 [nearest(intergenic) / Pan-related <PAN_ABC (PAN_Nasser)> / Non_PAN_ABC (Adp; LIV; MuSc; THY; ADR; Brain; Co); Non_PAN_SMR <Pos_Exp (Blood)>] / MAPK8IP1 [Strongly-Pan-related <PAN_ABC (acinar; PAN_Nasser)> / Non_PAN_ABC (MuSc; Brain)] / SLC35C1 [Pan-related <PAN_ABC (PAN_Nasser)> / Non_PAN_ABC (MuSc)] / C11orf94 [Non_PAN_ABC (MuSc)]
EUR-meta-159	11:47479947 - 11:47579947	EUR	11:47529947:C:A	rs7124681	Primary	CELF1	intronic	0.21	127	94.2	3.24e-05	-+	0.303	-0.002	0.006	0.76	0.411	0.036	0.006	2.45e-08	CELF1;KBTBD4;NDUFS3;PTPMT1;RAPSN	CELF1	CELF1 [nearest(intronic) / Very-Strongly-Pan-related <PAN_ABC (beta; alpha; ductal; PAN_Nasser)> / Non_PAN_ABC (Adp; LIV; MuSc; ADR; Brain; SI; Co)] / KBTBD4 [Very-Strongly-Pan-related <PAN_ABC (beta; alpha; ductal; PAN_Nasser)> / Non_PAN_ABC (Adp; LIV; MuSc; ADR; Brain; SI; Co)] / NDUFS3 [Very-Strongly-Pan-related <PAN_ABC (beta; alpha; acinar; ductal; PAN_Nasser)> / Non_PAN_ABC (Adp; LIV; MuSc;…
EUR-meta-160	11:65276154 - 11:65376154	EUR	11:65294799:C:T	rs1783541	Primary	SCYL1	intronic	0.18	9	82.8	0.0158	++	0.171	0.034	0.008	2.4e-05	0.201	0.061	0.008	4.65e-14	SCYL1;SSSCA1-AS1;FAM89B;LTBP3;SSSCA1	SCYL1	SCYL1 [nearest(intronic) / Very-Strongly-Pan-related <PAN_ABC (beta; alpha; acinar; ductal; PAN_Nasser)> / Non_PAN_ABC (Adp; LIV; MuSc; THY; ADR; Brain; SI; Co)] / SSSCA1-AS1 [Very-Strongly-Pan-related <PAN_ABC (beta; alpha; acinar; ductal; PAN_Nasser)> / Non_PAN_ABC (Adp; LIV; MuSc; THY; ADR; Brain; SI; Co); Non_PAN_SMR <Pos_Exp (Adp-Sub; MuSc; THY; Co; Blood)>] / FAM89B [Strongly-Pan-related <P…
EUR-meta-161	11:69413679 - 11:69513679	EUR	11:69456000:G:C	rs55911137	Primary	CCND1	5UTR	0.43	8	56.5	0.13	--	0.007	-0.236	0.056	2.52e-05	0.026	-0.145	0.021	9.94e-12	CCND1;ORAOV1;MYEOV	CCND1	CCND1 [nearest(5UTR) / Very-Strongly-Pan-related <PAN_ABC (beta; acinar; ductal; PAN_Nasser)> / Non_PAN_ABC (Adp; LIV; MuSc; THY; ADR; Brain; SI; Co)] / ORAOV1 [Pan-related <PAN_ABC (PAN_Nasser)> / Non_PAN_ABC (LIV; MuSc; Brain)] / MYEOV [Non_PAN_ABC (Brain)]
EAS-meta-189	11:72413435 - 11:72513435	EAS/EUR	11:72288725:T:C	rs1980089	Secondary	PDE2A	intronic	NA	NA	89.7	0.0018	-+	0.237	0.022	0.007	0.00158	0.523	-0.007	0.006	0.247	PDE2A;RP11-169D4.1	PDE2A	PDE2A [nearest(intronic) / Non_PAN_ABC (LIV; MuSc; ADR)] / RP11-169D4.1 [Non_PAN_ABC (MuSc)]
EAS-meta-188	11:72413435 - 11:72513435	EAS/EUR	11:72463435:G:A	rs7109575	Primary	ARAP1	5UTR	0.14	12	83.1	0.0151	--	0.058	-0.138	0.013	1.02e-25	0.164	-0.1	0.009	1.21e-30	ARAP1;STARD10;ATG16L2;PDE2A;RP11-169D4.1	STARD10	ARAP1 [nearest(5UTR) / Pan-related <PAN_ABC (alpha; ductal; PAN_Nasser)> / Non_PAN_ABC (Adp; LIV; MuSc; THY; ADR; Brain; SI; Co)] / STARD10 [Very-Strongly-Pan-related <PAN_ABC (beta; alpha; acinar; ductal; PAN_Nasser)> / Non_PAN_ABC (Adp; LIV; MuSc; THY; ADR; Brain; SI; Co)] / ATG16L2 [Pan-related <PAN_ABC (PAN_Nasser)> / Non_PAN_ABC (Adp; LIV; MuSc; THY; ADR; Brain; SI; Co)] / PDE2A [Pan-related…
EUR-meta-162	11:72413435 - 11:72513435	EAS/EUR	11:72460398:A:C	rs77464186	Primary	ARAP1	intronic	0.21	7	81.9	0.0186	++	0.057	-0.137	0.013	1.93e-25	0.164	-0.1	0.009	9.3e-31	STARD10;ARAP1;PDE2A;ATG16L2;RP11-169D4.1	STARD10	STARD10 [Very-Strongly-Pan-related <PAN_ABC (beta; alpha; acinar; ductal; PAN_Nasser)> / Non_PAN_ABC (Adp; LIV; MuSc; THY; ADR; Brain; SI; Co); Non_PAN_SMR <Pos_Exp (Adp-Sub; Adp-Vis; MuSc; THY; Brain; Blood)>] / ARAP1 [nearest(intronic) / Pan-related <PAN_ABC (alpha; ductal; PAN_Nasser)> / Non_PAN_ABC (Adp; LIV; MuSc; THY; ADR; Brain; SI; Co); Non_PAN_SMR <Neg_Exp (Brain)>] / PDE2A [Pan-related …
EAS-meta-190	11:75400576 - 11:75500576	EAS	11:75450576:T:C	rs673335	Primary	MOGAT2(+6.6kb)	intergenic	0.34	11	12.7	0.285	--	0.339	0.035	0.006	3.01e-08	0.178	0.024	0.008	0.00386	MOGAT2;DGAT2	MOGAT2	MOGAT2 [nearest(intergenic) / Non_PAN_ABC (Adp)] / DGAT2 [Non_PAN_ABC (Adp; LIV)]
EAS-meta-191	11:92658710 - 11:92758710	EAS/EUR	11:92673572:A:G	rs724030	Primary	MTNR1B(-29.3kb)	intergenic	0.11	27	93.8	5.74e-05	--	0.438	0.036	0.006	1.53e-08	0.387	0.073	0.006	4.11e-29	MTNR1B;SLC36A4	MTNR1B	MTNR1B [nearest(intergenic)] / SLC36A4 [Non_PAN_ABC (Co)]
EUR-meta-163	11:92658710 - 11:92758710	EAS/EUR	11:92708710:C:G	rs10830963	Primary	MTNR1B	intronic	1	1	98.1	2.15e-13	--	0.423	0.032	0.006	1.03e-07	0.279	0.101	0.007	1.12e-45	MTNR1B	MTNR1B	MTNR1B [nearest(intronic)]
EUR-meta-164	11:92658710 - 11:92758710	EAS/EUR	11:93134216:G:A	rs11020312	Secondary	CCDC67	intronic	NA	NA	NA	NA	?-	NA	NA	NA	NA	0.578	-0.037	0.006	1.72e-08	CCDC67;AP003969.2;DEUP1;SMCO4	CCDC67	CCDC67 [nearest(intronic) / Non_PAN_ABC (Brain); Non_PAN_SMR <Neg_Exp (THY)>] / AP003969.2 [Non_PAN_SMR <Pos_Exp (Brain)>] / DEUP1 [Non_PAN_SMR <Neg_Exp (Brain)>] / SMCO4 [Non_PAN_SMR <Pos_Exp (Brain) / Neg_Exp (Co)>]
EUR-meta-166	11:128339391 - 11:128439391	EUR	11:128041582:G:A	rs7933438	Secondary	ETS1(-287.1kb)	intergenic	NA	NA	89.4	0.00216	--	0.306	-0.023	0.006	0.000357	0.147	-0.058	0.009	4.84e-10	ETS1	ETS1	ETS1 [nearest(intergenic)]
EUR-meta-165	11:128339391 - 11:128439391	EUR	11:128398938:C:T	rs67232546	Primary	ETS1	intronic	0.42	23	23.5	0.253	++	0.16	0.04	0.009	6.55e-06	0.205	0.053	0.008	2.51e-11	ETS1	ETS1	ETS1 [nearest(intronic) / Pan-related <PAN_ABC (PAN_Nasser)>]
EUR-meta-167	11:128339391 - 11:128439391	EUR	11:128226431:C:G	rs7119618	Secondary	ETS1(-102.2kb)	intergenic	NA	NA	0	0.442	--	0.259	0.031	0.007	4.75e-06	0.283	0.039	0.007	3.75e-08	ETS1;C11orf45;FLI1;LOC101929538;SENCR	ETS1	ETS1 [nearest(intergenic) / Non_PAN_ABC (ADR)] / C11orf45 [NA] / FLI1 [Non_PAN_ABC (ADR)] / LOC101929538 [NA] / SENCR [Non_PAN_ABC (ADR)]
EAS-meta-194	12:4334844 - 12:4434844	EAS/EUR	12:4399050:G:A	rs3217860	Secondary	CCND2	intronic	NA	NA	69.4	0.0707	--	0.428	-0.036	0.006	2.93e-08	0.738	-0.054	0.007	5.58e-13	CCND2;CCND2-AS1	CCND2	CCND2 [nearest(intronic)] / CCND2-AS1 [Non_PAN_ABC (Adp; ADR)]
EAS-meta-192	12:4334844 - 12:4434844	EAS/EUR	12:4379831:C:T	rs12822620	Primary	CCND2(-3.1kb)	intergenic	0.39	12	NA	NA	+?	0.275	0.063	0.009	3.93e-13	NA	NA	NA	NA	CCND2;C12orf5;CCND2-AS1;FGF23;FGF6	CCND2	CCND2 [nearest(intergenic) / Strongly-Pan-related <PAN_ABC (alpha; acinar; PAN_Nasser)> / Non_PAN_ABC (Adp; LIV; MuSc; THY; ADR; Brain; SI; Co)] / C12orf5 [Non_PAN_ABC (Adp; LIV; MuSc; Brain; SI)] / CCND2-AS1 [Non_PAN_ABC (Adp; LIV; MuSc; THY; Brain; SI; Co)] / FGF23 [Non_PAN_ABC (Brain; SI)] / FGF6 [Non_PAN_ABC (MuSc)]
EAS-meta-193	12:4334844 - 12:4434844	EAS/EUR	12:4301513:CAGTATTTTTT:C	rs59186484	Secondary	CCND2(-81.4kb)	intergenic	NA	NA	NA	NA	+?	0.095	-0.07	0.011	6.44e-11	NA	NA	NA	NA	CCND2	CCND2	CCND2 [nearest(intergenic)]
EUR-meta-172	12:4334844 - 12:4434844	EAS/EUR	12:4382324:G:C	rs3812821	Secondary	CCND2	upstream	NA	NA	91.8	0.000479	--	0.499	-0.051	0.008	1.15e-10	0.317	-0.013	0.007	0.078	CCND2;C12orf5;CCND2-AS1;C12orf4;RAD51AP1	CCND2	CCND2 [nearest(upstream) / Non_PAN_ABC (Adp; LIV; ADR); Non_PAN_SMR <Pos_Exp (Blood) / Neg_Exp (Adp-Sub; MuSc; PIT)>] / C12orf5 [Non_PAN_ABC (Adp; ADR); Non_PAN_SMR <Pos_Exp (Blood)>] / CCND2-AS1 [Non_PAN_ABC (Adp; LIV; ADR); Non_PAN_SMR <Neg_Exp (Brain)>] / C12orf4 [Non_PAN_ABC (Adp)] / RAD51AP1 [Non_PAN_ABC (Adp)]
EUR-meta-171	12:4334844 - 12:4434844	EAS/EUR	12:4462146:G:A	rs1046164	Secondary	C12orf5	3UTR	NA	NA	60.6	0.111	++	0.212	0.015	0.007	0.0367	0.216	0.032	0.008	3.24e-05	C12orf5;CCND2;CCND2-AS1	C12orf5	C12orf5 [nearest(3UTR) / Non_PAN_SMR <Pos_Exp (Blood)>] / CCND2 [Non_PAN_SMR <Pos_Exp (Blood) / Neg_Exp (Adp-Sub; MuSc; PIT)>] / CCND2-AS1 [Non_PAN_SMR <Neg_Exp (Brain)>]
EUR-meta-168	12:4334844 - 12:4434844	EAS/EUR	12:4384844:G:T	rs76895963	Primary	CCND2	intronic	1	1	NA	NA	?+	NA	NA	NA	NA	0.98	0.483	0.028	9.12e-69	CCND2;CCND2-AS1;C12orf5	CCND2	CCND2 [nearest(intronic) / Non_PAN_ABC (MuSc; Brain); Non_PAN_SMR <Pos_Exp (Blood) / Neg_Exp (Adp-Sub; MuSc; PIT)>] / CCND2-AS1 [Non_PAN_ABC (MuSc; Brain); Non_PAN_SMR <Neg_Exp (Brain)>] / C12orf5 [Non_PAN_SMR <Pos_Exp (Blood)>]
EUR-meta-169	12:4334844 - 12:4434844	EAS/EUR	12:4384696:C:T	rs3217792	Secondary	CCND2	intronic	NA	NA	NA	NA	?-	NA	NA	NA	NA	0.087	-0.117	0.012	6.27e-22	CCND2;CCND2-AS1;C12orf5;C12orf4;RAD51AP1	CCND2	CCND2 [nearest(intronic) / Strongly-Pan-related <PAN_ABC (acinar; PAN_Nasser)> / Non_PAN_ABC (Adp; LIV; MuSc; THY; ADR; Brain; SI; Co); Non_PAN_SMR <Pos_Exp (Blood) / Neg_Exp (Adp-Sub; MuSc; PIT)>] / CCND2-AS1 [Pan-related <PAN_ABC (PAN_Nasser)> / Non_PAN_ABC (Adp; LIV; MuSc; THY; ADR; Brain; SI; Co); Non_PAN_SMR <Neg_Exp (Brain)>] / C12orf5 [Non_PAN_ABC (ADR); Non_PAN_SMR <Pos_Exp (Blood)>] / C1…
EUR-meta-170	12:4334844 - 12:4434844	EAS/EUR	12:4033222:G:C	rs10848960	Secondary	PARP11(+50.6kb)	intergenic	NA	NA	NA	NA	?-	NA	NA	NA	NA	0.231	-0.04	0.008	1.84e-07	PARP11	PARP11	PARP11 [nearest(intergenic)]
EUR-meta-173	12:4334844 - 12:4434844	EAS/EUR	12:4521511:T:A	rs78470967	Secondary	FGF6(-15.8kb)	intergenic	NA	NA	NA	NA	?-	NA	NA	NA	NA	0.038	-0.082	0.018	3.15e-06	C12orf5;CCND2;CCND2-AS1;FGF6	FGF6	C12orf5 [Non_PAN_SMR <Pos_Exp (Blood)>] / CCND2 [Non_PAN_SMR <Pos_Exp (Blood) / Neg_Exp (Adp-Sub; MuSc; PIT)>] / CCND2-AS1 [Non_PAN_SMR <Neg_Exp (Brain)>] / FGF6 [nearest(intergenic)]
EUR-meta-174	12:12821099 - 12:12921099	EUR	12:12871099:T:G	rs2066827	Primary	CDKN1B	exonic	1	1	0	0.371	--	0.033	0.03	0.018	0.0938	0.233	0.047	0.008	4.44e-09	CDKN1B;APOLD1;CREBL2;DDX47;GPR19	CDKN1B	CDKN1B [nearest(exonic) / rs2066827 [VEP_Low: R2 (EAS:EUR=1:1)] / Pan-related <PAN_ABC (PAN_Nasser)> / Non_PAN_ABC (Adp; LIV; MuSc; ADR; Brain; SI; Co)] / APOLD1 [Pan-related <PAN_ABC (PAN_Nasser)> / Non_PAN_ABC (Adp; MuSc; Brain)] / CREBL2 [Pan-related <PAN_ABC (PAN_Nasser)> / Non_PAN_ABC (Adp; LIV; MuSc; Brain)] / DDX47 [Pan-related <PAN_ABC (PAN_Nasser)> / Non_PAN_ABC (Adp; LIV; MuSc; Brain)] …
EUR-meta-175	12:26420850 - 12:26520850	EUR	12:26457190:G:A	rs1872992	Primary	SSPN(+5kb)	intergenic	0.08	19	87.8	0.00414	--	0.277	-0.018	0.007	0.0091	0.741	-0.046	0.007	2.52e-10	SSPN;BHLHE41;IFLTD1	SSPN	SSPN [nearest(intergenic) / Non_PAN_ABC (Adp; MuSc)] / BHLHE41 [Non_PAN_ABC (MuSc)] / IFLTD1 [Non_PAN_ABC (MuSc)]
EAS-meta-195	12:27913402 - 12:28013402	EAS/EUR	12:27963402:G:A	rs3751236	Primary	KLHL42(+7.4kb)	intergenic	0.14	7	0	0.535	--	0.335	-0.068	0.006	1.83e-26	0.196	-0.075	0.008	1.54e-20	KLHL42;MRPS35	KLHL42	KLHL42 [nearest(intergenic) / Non_PAN_SMR <Neg_Exp (Blood)>] / MRPS35 [Non_PAN_SMR <Neg_Exp (MuSc)>]
EUR-meta-176	12:27913402 - 12:28013402	EAS/EUR	12:27962934:G:A	rs7966976	Primary	KLHL42(+7kb)	intergenic	0.06	17	0	0.559	--	0.335	-0.069	0.007	9.52e-26	0.196	-0.075	0.008	1.22e-20	KLHL42;AC009509.4;MRPS35;RP11-1060J15.5	KLHL42	KLHL42 [nearest(intergenic) / Non_PAN_SMR <Neg_Exp (Blood)>] / AC009509.4 [Non_PAN_SMR <Neg_Exp (Brain)>] / MRPS35 [Non_PAN_SMR <Neg_Exp (Blood)>] / RP11-1060J15.5 [Non_PAN_SMR <Neg_Exp (Co)>]
EAS-meta-196	12:31391179 - 12:31491179	EAS	12:31441179:A:C	rs80234489	Primary	FAM60A	intronic	0.78	3	0	0.481	--	0.17	0.106	0.008	8.72e-39	0.008	0.173	0.094	0.0679	FAM60A;ETFBKMT;FLJ13224;DNM1L;FGD4	FAM60A	FAM60A [nearest(intronic) / Very-Strongly-Pan-related <PAN_ABC (beta; alpha; acinar; ductal; PAN_Nasser)> / Non_PAN_ABC (LIV; MuSc; ADR; Brain; SI; Co); Non_PAN_SMR <Pos_Exp (MuSc; Blood)>] / ETFBKMT [Very-Strongly-Pan-related <PAN_ABC (beta)>] / FLJ13224 [Very-Strongly-Pan-related <PAN_ABC (beta; alpha; acinar; ductal)>] / DNM1L [Pan-related <PAN_ABC (PAN_Nasser)> / Non_PAN_ABC (Brain; SI; Co)] …
EAS-meta-197	12:50213148 - 12:50313148	EAS	12:50269863:C:T	rs77978149	Primary	FAIM2	intronic	0.7	10	0	0.742	++	0.087	0.073	0.012	1.68e-10	0.004	0.098	0.073	0.182	FAIM2	FAIM2	FAIM2 [nearest(intronic) / Non_PAN_SMR <Pos_Exp (Brain)>]
EAS-meta-198	12:57096069 - 12:57196069	EAS	12:57146069:T:G	rs2277339	Primary	PRIM1:HSD17B6	exonic:5UTR	1	1	0	0.451	--	0.214	0.042	0.007	1.22e-08	0.104	0.032	0.011	0.00264	PRIM1;HSD17B6;NACA	PRIM1	PRIM1 [nearest(exonic:5UTR) / rs2277339 [VEP_Medium: R2 (EAS:EUR=1:1)] / Very-Strongly-Pan-related <PAN_ABC (beta; PAN_Nasser)> / Non_PAN_ABC (Adp; LIV; MuSc; ADR; Brain; SI; Co); Non_PAN_SMR <Pos_Exp (Brain; Blood)>] / HSD17B6 [Pan-related <PAN_ABC (PAN_Nasser)> / Non_PAN_ABC (LIV; MuSc; Brain)] / NACA [Non_PAN_ABC (Brain)]
EAS-meta-199	12:66189111 - 12:66289111	EAS/EUR	12:66239111:A:C	rs2612059	Primary	HMGA2	intronic	0.18	7	82.1	0.0181	--	0.338	0.056	0.006	9.14e-19	0.141	0.083	0.009	2.55e-19	HMGA2	HMGA2	HMGA2 [nearest(intronic)]
EUR-meta-177	12:66189111 - 12:66289111	EAS/EUR	12:66221060:A:T	rs2258238	Primary	HMGA2	intronic	0.1	32	93.7	6.81e-05	--	0.121	0.046	0.009	4.9e-07	0.104	0.102	0.011	5.14e-22	HMGA2;LOC100129940;LOC105369187;DYRK2;GNS	HMGA2	HMGA2 [nearest(intronic) / Pan-related <PAN_ABC (PAN_Nasser)> / Non_PAN_ABC (Adp; LIV; MuSc; ADR; Brain; SI; Co)] / LOC100129940 [Strongly-Pan-related <PAN_ABC (acinar)>] / LOC105369187 [Strongly-Pan-related <PAN_ABC (acinar; ductal)>] / DYRK2 [Pan-related <PAN_ABC (PAN_Nasser)>] / GNS [Pan-related <PAN_ABC (PAN_Nasser)> / Non_PAN_ABC (LIV; Brain)]
EUR-meta-178	12:66189111 - 12:66289111	EAS/EUR	12:66360164:T:C	rs7970350	Secondary	HMGA2	downstream	NA	NA	93.6	7.98e-05	++	0.234	-0.015	0.007	0.0338	0.512	-0.054	0.006	4.17e-17	HMGA2	HMGA2	HMGA2 [nearest(downstream)]
EAS-meta-200	12:71401567 - 12:71501567	EAS/EUR	12:71451567:G:A	rs966583	Primary	TSPAN8(-67.3kb)	intergenic	0.08	22	0	0.629	++	0.369	0.042	0.006	7.02e-12	0.421	0.046	0.006	8.82e-13	TSPAN8;CTD-2021H9.3;LGR5	TSPAN8	TSPAN8 [nearest(intergenic) / Non_PAN_ABC (SI)] / CTD-2021H9.3 [Non_PAN_SMR <Pos_Exp (MuSc)>] / LGR5 [Non_PAN_ABC (SI)]
EAS-meta-201	12:71401567 - 12:71501567	EAS/EUR	12:71379626:T:C	rs185818594	Secondary	PTPRR(+65kb)	intergenic	NA	NA	NA	NA	-?	0.005	0.209	0.041	4.05e-07	NA	NA	NA	NA	CTD-2021H9.3;PTPRR	PTPRR	CTD-2021H9.3 [Non_PAN_SMR <Pos_Exp (MuSc)>] / PTPRR [nearest(intergenic)]
EUR-meta-179	12:71401567 - 12:71501567	EAS/EUR	12:71523043:C:A	rs1705263	Primary	TSPAN8	intronic	0.15	82	56.3	0.131	--	0.469	-0.034	0.007	1.66e-07	0.437	-0.048	0.006	3.51e-14	TSPAN8;CTD-2021H9.3	TSPAN8	TSPAN8 [nearest(intronic) / Non_PAN_SMR <Neg_Exp (LIV)>] / CTD-2021H9.3 [Non_PAN_SMR <Pos_Exp (MuSc) / Neg_Exp (Co)>]
EUR-meta-180	12:95865763 - 12:95965763	EUR	12:95921998:T:C	rs61939481	Primary	USP44	intronic	0.09	29	0	0.816	--	0.01	0.062	0.037	0.0917	0.068	0.071	0.013	1.74e-08	METAP2;USP44	USP44	METAP2 [rs2305293 [VEP_Low: R2 (EAS:EUR=0.96:0.96)] / Non_PAN_ABC (LIV)] / USP44 [nearest(intronic)]
EAS-meta-202	12:97798910 - 12:97898910	EAS/EUR	12:97850215:C:A	rs10860209	Primary	NEDD1(+503.1kb)	intergenic	0.24	6	43.1	0.185	--	0.411	-0.036	0.006	6.15e-09	0.147	-0.021	0.009	0.0183	NEDD1;RMST	NEDD1	NEDD1 [nearest(intergenic)] / RMST [Non_PAN_ABC (THY)]
EUR-meta-181	12:97798910 - 12:97898910	EAS/EUR	12:97848775:A:G	rs77864822	Primary	NEDD1(+501.6kb)	intergenic	0.58	14	93.3	0.00011	++	0.052	-0.001	0.014	0.957	0.071	-0.075	0.013	5e-09	NEDD1;RMST	NEDD1	NEDD1 [nearest(intergenic)] / RMST [Non_PAN_ABC (THY)]
EAS-meta-203	12:108579780 - 12:108679780	EAS/EUR	12:108629780:A:G	rs1426371	Primary	WSCD2	intronic	0.9	2	0	0.803	--	0.483	0.049	0.006	4.82e-15	0.734	0.052	0.007	1.74e-12	WSCD2	WSCD2	WSCD2 [nearest(intronic) / rs3764002 [VEP_Medium: R2 (EAS:EUR=0.94:0.99)]]
EUR-meta-182	12:108579780 - 12:108679780	EAS/EUR	12:108629780:A:G	rs1426371	Primary	WSCD2	intronic	0.74	2	0	0.803	--	0.483	0.049	0.006	4.82e-15	0.734	0.052	0.007	1.74e-12	WSCD2	WSCD2	WSCD2 [nearest(intronic) / rs3764002 [VEP_Medium: R2 (EAS:EUR=0.94:0.99)]]
EAS-meta-204	12:111786771 - 12:111886771	EAS	12:111836771:A:AC	rs149212747	Primary	SH2B3(-7kb)	intergenic	0.9	4	NA	NA	+?	0.226	-0.054	0.008	3.64e-11	NA	NA	NA	NA	SH2B3	SH2B3	SH2B3 [nearest(intergenic) / Non_PAN_ABC (Adp; ADR)]
EAS-meta-205	12:114067760 - 12:114167760	EAS	12:114123722:C:G	rs7307263	Primary	RBM19(-130.8kb)	intergenic	0.15	26	85.1	0.00963	--	0.44	0.037	0.006	8.92e-10	0.425	0.014	0.006	0.031	RBM19	RBM19	RBM19 [nearest(intergenic)]
EAS-meta-206	12:118362373 - 12:118462373	EAS/EUR	12:118402657:T:C	rs4534678	Primary	KSR2	intronic	0.21	11	90.5	0.00117	--	0.251	0.066	0.007	3.15e-20	0.223	0.032	0.008	4.06e-05	KSR2;LOC105370024;PEBP1;VSIG10;WSB2	LOC105370024	KSR2 [nearest(intronic) / Pan-related <PAN_ABC (PAN_Nasser)> / Non_PAN_ABC (LIV; Brain; Co)] / LOC105370024 [Very-Strongly-Pan-related <PAN_ABC (beta; alpha)>] / PEBP1 [Very-Strongly-Pan-related <PAN_ABC (beta; alpha)>] / VSIG10 [Very-Strongly-Pan-related <PAN_ABC (beta; ductal)>] / WSB2 [Very-Strongly-Pan-related <PAN_ABC (beta; alpha; acinar)>]
EUR-meta-183	12:118362373 - 12:118462373	EAS/EUR	12:118394008:T:C	rs7313918	Primary	KSR2	intronic	0.68	6	0	0.926	--	0.286	0.055	0.007	2.32e-14	0.136	0.056	0.009	2.99e-09	KSR2	KSR2	KSR2 [nearest(intronic)]
EAS-meta-208	12:121313506 - 12:121413506	EAS/EUR	12:121432299:C:T	rs55783344	Secondary	HNF1A	intronic	NA	NA	91.1	0.00078	+-	0.18	0.077	0.008	1.5e-22	0.016	-0.014	0.026	0.579	C12orf43;HNF1A;HNF1A-AS1;OASL;SPPL3	C12orf43	C12orf43 [rs3751152 [VEP_Medium: R2 (EAS:EUR=0.88:0.98)] / Very-Strongly-Pan-related <PAN_ABC (beta; ductal; PAN_Nasser)> / Non_PAN_ABC (Adp; LIV; MuSc; ADR; Brain; SI; Co); Non_PAN_SMR <Pos_Exp (Adp-Vis; THY)>] / HNF1A [nearest(intronic) / Pan-related <PAN_ABC (PAN_Nasser)> / Non_PAN_ABC (Adp; LIV; SI; Co)] / HNF1A-AS1 [Pan-related <PAN_ABC (alpha; PAN_Nasser)> / Non_PAN_ABC (LIV; MuSc; Brain; S…
EAS-meta-207	12:121313506 - 12:121413506	EAS/EUR	12:121363506:A:G	rs118074491	Primary	SPPL3(+21.3kb)	intergenic	0.64	3	NA	NA	-?	0.032	0.181	0.018	4.53e-23	NA	NA	NA	NA	ACADS;C12orf43;PLA2G1B;SPPL3;UNC119B	ACADS	ACADS [Very-Strongly-Pan-related <PAN_ABC (beta; alpha; acinar; ductal; PAN_Nasser)> / Non_PAN_ABC (Adp; LIV; MuSc; THY; ADR; Brain; Co)] / C12orf43 [Pan-related <PAN_ABC (PAN_Nasser)> / Non_PAN_ABC (Adp; MuSc; Brain; Co); Non_PAN_SMR <Pos_Exp (Adp-Vis; THY)>] / PLA2G1B [Strongly-Pan-related <PAN_ABC (acinar; ductal; PAN_Nasser)> / Non_PAN_ABC (LIV; ADR; Co)] / SPPL3 [nearest(intergenic) / Pan-re…
EAS-meta-209	12:121313506 - 12:121413506	EAS/EUR	12:121238607:C:T	rs138213721	Secondary	SPPL3	intronic	NA	NA	NA	NA	-?	0.004	-0.457	0.072	2.26e-10	NA	NA	NA	NA	ANAPC5;P2RX4;RNF34;PXN;SPPL3	P2RX4	ANAPC5 [Very-Strongly-Pan-related <PAN_ABC (beta; alpha; ductal; PAN_Nasser)> / Non_PAN_ABC (Adp; MuSc; ADR; Brain; SI; Co)] / P2RX4 [Very-Strongly-Pan-related <PAN_ABC (beta; alpha; ductal)> / Non_PAN_ABC (Adp; MuSc; Brain)] / RNF34 [Very-Strongly-Pan-related <PAN_ABC (beta; alpha; ductal; PAN_Nasser)> / Non_PAN_ABC (Adp; MuSc; ADR; Brain; SI; Co)] / PXN [Pan-related <PAN_ABC (PAN_Nasser)>] / SP…
EUR-meta-184	12:121313506 - 12:121413506	EAS/EUR	12:121432117:G:C	rs56348580	Primary	HNF1A	3UTR	0.51	5	NA	NA	?-	NA	NA	NA	NA	0.308	-0.062	0.007	4.31e-19	C12orf43;HNF1A;OASL;ACADS;CAMKK2	C12orf43	C12orf43 [Very-Strongly-Pan-related <PAN_ABC (beta; ductal; PAN_Nasser)> / Non_PAN_ABC (Adp; LIV; MuSc; THY; ADR; Brain; SI; Co); Non_PAN_SMR <Pos_Exp (Blood)>] / HNF1A [nearest(3UTR) / Non_PAN_SMR <Neg_Exp (Blood)>] / OASL [Pan-related <PAN_ABC (PAN_Nasser)> / Non_PAN_ABC (Adp; MuSc; Brain); Non_PAN_SMR <Pos_Exp (Blood)>] / ACADS [Non_PAN_SMR <Pos_Exp (THY)>] / CAMKK2 [Non_PAN_SMR <Neg_Exp (Bloo…
EUR-meta-185	12:121313506 - 12:121413506	EAS/EUR	12:121380541:G:A	rs73226260	Secondary	HNF1A(-35.8kb)	intergenic	NA	NA	NA	NA	?-	NA	NA	NA	NA	0.033	-0.121	0.019	1.36e-10	HNF1A;ACADS;C12orf43;OASL;P2RX4	HNF1A	HNF1A [nearest(intergenic) / Non_PAN_SMR <Neg_Exp (Blood)>] / ACADS [Non_PAN_SMR <Pos_Exp (THY)>] / C12orf43 [Non_PAN_SMR <Pos_Exp (Blood)>] / OASL [Non_PAN_SMR <Pos_Exp (Blood)>] / P2RX4 [Non_PAN_SMR <Pos_Exp (Blood)>]
EUR-meta-186	12:121313506 - 12:121413506	EAS/EUR	12:121416864:C:T	rs1800574	Secondary	HNF1A	exonic	NA	NA	NA	NA	?+	NA	NA	NA	NA	0.029	0.151	0.019	2.75e-15	HNF1A;HNF1A-AS1;ACADS;C12orf43;CAMKK2	HNF1A	HNF1A [nearest(exonic) / rs1800574 [VEP_Low: R2 (EAS:EUR=1:1)] / Pan-related <PAN_ABC (PAN_Nasser)> / Non_PAN_SMR <Neg_Exp (Blood)>] / HNF1A-AS1 [Pan-related <PAN_ABC (alpha; PAN_Nasser)>] / ACADS [Non_PAN_SMR <Pos_Exp (THY)>] / C12orf43 [Non_PAN_SMR <Pos_Exp (Blood)>] / CAMKK2 [Non_PAN_SMR <Neg_Exp (Blood)>]
EUR-meta-187	12:123414279 - 12:123514279	EUR	12:123450765:C:G	rs4148856	Primary	ABCB9	intronic	0.09	198	90.5	0.00119	++	0.131	-0.009	0.009	0.336	0.217	-0.047	0.008	1.31e-09	MPHOSPH9;ARL6IP4;C12orf65;ABCB9;VPS37B	MPHOSPH9	MPHOSPH9 [rs1051431 [VEP_High: R2 (EAS:EUR=ND:0.9)] / Very-Strongly-Pan-related <PAN_ABC (beta; PAN_Nasser)> / Non_PAN_ABC (MuSc; Brain); Non_PAN_SMR <Pos_Exp (THY) / Neg_Exp (Blood)>] / ARL6IP4 [Very-Strongly-Pan-related <PAN_ABC (beta; alpha; ductal; PAN_Nasser) / PAN-SMR (Pos_Exp)> / Non_PAN_ABC (LIV; MuSc; Brain); Non_PAN_SMR <Neg_Exp (Blood)>] / C12orf65 [Very-Strongly-Pan-related <PAN_ABC (…
EUR-meta-188	12:124460391 - 12:124560391	EUR	12:124510391:T:C	rs10773051	Primary	FAM101A	intronic	0.79	9	83	0.0153	--	0.465	0.018	0.006	0.00304	0.765	0.041	0.007	4.98e-08	FAM101A;ATP6V0A2;CCDC92;TCTN2;ZNF664	FAM101A	FAM101A [nearest(intronic) / Non_PAN_ABC (Adp)] / ATP6V0A2 [Non_PAN_ABC (Adp)] / CCDC92 [Non_PAN_ABC (Adp)] / TCTN2 [Non_PAN_ABC (Adp)] / ZNF664 [Non_PAN_ABC (Adp)]
EUR-meta-189	12:133020294 - 12:133120294	EUR	12:133068484:G:A	rs35318451	Primary	FBRSL1	intronic	0.35	7	0	0.842	++	0.117	0.05	0.01	2.86e-07	0.331	0.048	0.007	9.5e-12	FBRSL1;NOC4L;LRCOL1;POLE;PXMP2	FBRSL1	FBRSL1 [nearest(intronic) / Pan-related <PAN_ABC (PAN_Nasser)> / Non_PAN_ABC (Adp; LIV; MuSc; ADR; Brain; SI; Co)] / NOC4L [Strongly-Pan-related <PAN_ABC (acinar; PAN_Nasser)> / Non_PAN_ABC (Adp; LIV; ADR)] / LRCOL1 [Pan-related <PAN_ABC (PAN_Nasser)> / Non_PAN_ABC (Adp)] / POLE [Pan-related <PAN_ABC (PAN_Nasser)> / Non_PAN_ABC (Adp)] / PXMP2 [Pan-related <PAN_ABC (PAN_Nasser)> / Non_PAN_ABC (Adp…
EAS-meta-210	13:22549995 - 13:22649995	EAS	13:22589883:G:A	rs9316706	Primary	FGF9(+311.2kb)	intergenic	0.22	24	88.4	0.00337	++	0.352	0.041	0.007	2.01e-09	0.83	0.009	0.009	0.278	FGF9	FGF9	FGF9 [nearest(intergenic)]
EAS-meta-211	13:26726999 - 13:26826999	EAS/EUR	13:26781528:G:A	rs10507349	Primary	RNF6	intronic	0.22	18	66.8	0.0827	--	0.428	-0.059	0.006	6.69e-23	0.229	-0.043	0.008	2.69e-08	RNF6;CDK8;MTMR6;RASL11A;CENPJ	RNF6	RNF6 [nearest(intronic) / Very-Strongly-Pan-related <PAN_ABC (beta; acinar; ductal; PAN_Nasser)> / Non_PAN_ABC (Adp; LIV; MuSc; THY; ADR; Brain; SI; Co); Non_PAN_SMR <Neg_Exp (Blood)>] / CDK8 [Very-Strongly-Pan-related <PAN_ABC (beta; ductal; PAN_Nasser)> / Non_PAN_ABC (Adp; LIV; MuSc; THY; ADR; Brain; SI; Co)] / MTMR6 [Strongly-Pan-related <PAN_ABC (acinar; ductal; PAN_Nasser)> / Non_PAN_ABC (Ad…
EUR-meta-190	13:26726999 - 13:26826999	EAS/EUR	13:26776999:A:G	rs34584161	Primary	RNF6	intronic	0.93	4	38.4	0.203	++	0.428	-0.059	0.006	9.07e-22	0.239	-0.047	0.007	5.36e-10	RNF6;CDK8;MTMR6;RASL11A;CENPJ	RNF6	RNF6 [nearest(intronic) / Very-Strongly-Pan-related <PAN_ABC (beta; acinar; ductal; PAN_Nasser)> / Non_PAN_ABC (Adp; LIV; MuSc; THY; ADR; Brain; SI; Co)] / CDK8 [Very-Strongly-Pan-related <PAN_ABC (beta; ductal; PAN_Nasser)> / Non_PAN_ABC (Adp; LIV; MuSc; THY; ADR; Brain; SI; Co)] / MTMR6 [Strongly-Pan-related <PAN_ABC (acinar; ductal; PAN_Nasser)> / Non_PAN_ABC (Adp; LIV; MuSc; ADR; Brain; Co)] …
EUR-meta-191	13:30987903 - 13:31087903	EUR	13:31042452:G:T	rs11842871	Primary	HMGB1	intronic	0.45	10	14.1	0.281	--	0.111	-0.027	0.01	0.00556	0.267	-0.04	0.007	4.82e-08	HMGB1;ALOX5AP;KATNAL1;LINC01058;USPL1	HMGB1	HMGB1 [nearest(intronic) / Very-Strongly-Pan-related <PAN_ABC (beta; alpha; acinar; ductal; PAN_Nasser)> / Non_PAN_ABC (Adp; LIV; MuSc; THY; ADR; Brain; SI; Co)] / ALOX5AP [Pan-related <PAN_ABC (PAN_Nasser)> / Non_PAN_ABC (LIV; Co)] / KATNAL1 [Pan-related <PAN_ABC (PAN_Nasser)> / Non_PAN_ABC (Adp; LIV; MuSc; THY; ADR; Brain; SI; Co)] / LINC01058 [Pan-related <PAN_ABC (PAN_Nasser)> / Non_PAN_ABC (…
EAS-meta-212	13:33504587 - 13:33604587	EAS/EUR	13:33557173:A:T	rs7983505	Primary	KL(-33kb)	intergenic	0.12	10	85.8	0.00791	--	0.168	0.079	0.008	9.3e-23	0.169	0.048	0.009	1.52e-08	KL	KL	KL [nearest(intergenic)]
EUR-meta-192	13:33504587 - 13:33604587	EAS/EUR	13:33554302:A:G	rs576674	Primary	KL(-35.9kb)	intergenic	0.24	4	74.6	0.0473	--	0.169	0.077	0.008	9.16e-22	0.169	0.054	0.009	3.7e-10	KL	KL	KL [nearest(intergenic)]
EAS-meta-213	13:51044114 - 13:51144114	EAS/EUR	13:51088809:A:G	rs123378	Primary	DLEU1	intronic	0.13	36	92.8	0.000185	--	0.192	0.049	0.008	1.73e-10	0.308	0.01	0.007	0.15	DLEU1	DLEU1	DLEU1 [nearest(intronic)]
EUR-meta-193	13:51044114 - 13:51144114	EAS/EUR	13:51094114:G:T	rs9316500	Primary	DLEU1	intronic	0.4	11	0	0.724	++	0.374	0.035	0.006	9.61e-09	0.712	0.039	0.007	3.45e-08	DLEU1;GUCY1B2	DLEU1	DLEU1 [nearest(intronic)] / GUCY1B2 [Non_PAN_ABC (MuSc)]
EAS-meta-214	13:54057352 - 13:54157352	EAS	13:54102206:G:A	rs12429545	Primary	OLFM4(+476kb)	intergenic	0.24	4	0	0.666	++	0.237	0.044	0.007	3.84e-10	0.13	0.038	0.01	0.000133	OLFM4	OLFM4	OLFM4 [nearest(intergenic)]
EUR-meta-194	13:59027406 - 13:59127406	EUR	13:59077406:T:A	rs9563615	Primary	PCDH17(+774kb)	intergenic	0.08	106	90.8	0.000996	++	0.432	0.008	0.007	0.228	0.709	0.041	0.007	1.63e-08	PCDH17	PCDH17	PCDH17 [nearest(intergenic)]
EAS-meta-215	13:80667156 - 13:80767156	EAS/EUR	13:80705730:T:A	rs17072370	Primary	SPRY2(-204.4kb)	intergenic	0.91	3	41.2	0.192	--	0.28	-0.083	0.007	3.68e-34	0.074	-0.064	0.013	5.9e-07	SPRY2;LINC01038;NDFIP2;NDFIP2-AS1;RBM26	SPRY2	SPRY2 [nearest(intergenic) / Pan-related <PAN_ABC (ductal; PAN_Nasser)> / Non_PAN_ABC (LIV; Brain; SI; Co)] / LINC01038 [Pan-related <PAN_ABC (PAN_Nasser)>] / NDFIP2 [Pan-related <PAN_ABC (PAN_Nasser)> / Non_PAN_ABC (LIV; MuSc; Brain)] / NDFIP2-AS1 [Pan-related <PAN_ABC (PAN_Nasser)> / Non_PAN_ABC (LIV; MuSc; Brain)] / RBM26 [Pan-related <PAN_ABC (PAN_Nasser)> / Non_PAN_ABC (Brain; SI)]
EUR-meta-195	13:80667156 - 13:80767156	EAS/EUR	13:80717156:G:A	rs1359790	Primary	SPRY2(-193kb)	intergenic	0.62	7	0	0.984	--	0.279	-0.082	0.007	2.24e-33	0.279	-0.082	0.007	1.76e-30	SPRY2;LINC01038;NDFIP2;NDFIP2-AS1;RBM26	SPRY2	SPRY2 [nearest(intergenic) / Pan-related <PAN_ABC (ductal; PAN_Nasser)> / Non_PAN_ABC (LIV; Brain; SI; Co); Non_PAN_SMR <Neg_Exp (Blood)>] / LINC01038 [Pan-related <PAN_ABC (PAN_Nasser)>] / NDFIP2 [Pan-related <PAN_ABC (PAN_Nasser)> / Non_PAN_ABC (LIV; MuSc; Brain)] / NDFIP2-AS1 [Pan-related <PAN_ABC (PAN_Nasser)> / Non_PAN_ABC (LIV; MuSc; Brain)] / RBM26 [Pan-related <PAN_ABC (PAN_Nasser)> / Non…
EAS-meta-216	13:91892919 - 13:91992919	EAS	13:91948047:G:A	rs9523295	Primary	GPC5(-102.9kb)	intergenic	0.19	29	90.4	0.00125	--	0.168	-0.07	0.008	2.38e-18	0.255	-0.035	0.007	1.57e-06	GPC5	GPC5	GPC5 [nearest(intergenic)]
EUR-meta-196	13:108747836 - 13:108847836	EUR	13:108797836:C:T	rs7325671	Primary	LIG4(-62kb)	intergenic	0.17	10	88.8	0.00275	++	0.146	0.016	0.009	0.0763	0.126	0.054	0.01	1.53e-08	LIG4	LIG4	LIG4 [nearest(intergenic)]
EUR-meta-197	14:23238935 - 14:23338935	EUR	14:23288935:C:G	rs17122772	Primary	SLC7A7	5UTR	0.23	5	0	0.484	--	0.051	0.032	0.014	0.0262	0.226	0.043	0.008	3.31e-08	MRPL52;OXA1L;SLC7A7;MMP14	SLC7A7	MRPL52 [Very-Strongly-Pan-related <PAN_ABC (beta; alpha)> / Non_PAN_ABC (MuSc; THY)] / OXA1L [Very-Strongly-Pan-related <PAN_ABC (beta)> / Non_PAN_ABC (MuSc; THY)] / SLC7A7 [nearest(5UTR) / Pan-related <PAN_ABC (PAN_Nasser)> / Non_PAN_ABC (Adp; LIV; MuSc; THY; SI; Co); Non_PAN_SMR <Pos_Exp (THY)>] / MMP14 [Non_PAN_ABC (MuSc; THY)]
EAS-meta-217	14:24828370 - 14:24928370	EAS	14:24878370:C:T	rs12437434	Primary	NYNRIN	exonic	1	1	30.5	0.23	-+	0.286	-0.05	0.007	1.3e-13	0.03	0.004	0.045	0.927	NYNRIN	NYNRIN	NYNRIN [nearest(exonic) / rs12437434 [VEP_Low: R2 (EAS:EUR=1:1)]]
EAS-meta-218	14:33253298 - 14:33353298	EAS/EUR	14:33303589:T:G	rs12885124	Primary	AKAP6(+3kb)	intergenic	0.08	25	0	0.599	--	0.244	0.039	0.007	3.38e-08	0.479	0.034	0.007	2.54e-07	AKAP6	AKAP6	AKAP6 [nearest(intergenic)]
EUR-meta-198	14:33253298 - 14:33353298	EAS/EUR	14:33302882:G:T	rs17522122	Primary	AKAP6(+2.3kb)	intergenic	0.27	21	42.2	0.188	++	0.352	0.024	0.006	0.00027	0.474	0.036	0.006	2.49e-08	AKAP6	AKAP6	AKAP6 [nearest(intergenic)]
EAS-meta-219	14:38753756 - 14:38853756	EAS	14:38821706:T:C	rs1958465	Primary	CLEC14A(+96.1kb)	intergenic	0.29	55	0	0.773	--	0.463	0.04	0.006	3.12e-11	0.739	0.037	0.007	3.03e-07	CLEC14A	CLEC14A	CLEC14A [nearest(intergenic)]
EAS-meta-220	14:77325691 - 14:77425691	EAS	14:77384159:C:A	rs56059947	Primary	C14orf166B(+47.5kb)	intergenic	0.2	24	68.9	0.0732	++	0.331	0.045	0.007	4.12e-11	0.146	0.025	0.009	0.00735	C14orf166B;IRF2BPL;LOC283575;DIO2;NRXN3	IRF2BPL	C14orf166B [nearest(intergenic) / Pan-related <PAN_ABC (PAN_Nasser)>] / IRF2BPL [Very-Strongly-Pan-related <PAN_ABC (beta; alpha; acinar; PAN_Nasser)> / Non_PAN_ABC (Adp; MuSc; THY; ADR; Brain; Co)] / LOC283575 [Very-Strongly-Pan-related <PAN_ABC (beta; alpha; acinar)>] / DIO2 [Pan-related <PAN_ABC (PAN_Nasser)> / Non_PAN_ABC (MuSc)] / NRXN3 [Pan-related <PAN_ABC (PAN_Nasser)> / Non_PAN_ABC (MuSc…
EAS-meta-221	14:77325691 - 14:77425691	EAS	14:77327254:G:T	rs45536531	Secondary	C14orf166B	intronic	NA	NA	82.8	0.0159	++	0.482	0.034	0.006	2.57e-08	0.517	0.013	0.006	0.0523	C14orf166B	C14orf166B	C14orf166B [nearest(intronic)]
EUR-meta-199	14:79894099 - 14:79994099	EUR	14:79944099:G:A	rs8008910	Primary	NRXN3	intronic	0.12	14	NA	NA	?+	NA	NA	NA	NA	0.219	0.055	0.008	4.22e-13	NRXN3	NRXN3	NRXN3 [nearest(intronic)]
EAS-meta-222	14:91918127 - 14:92018127	EAS/EUR	14:91947508:T:G	rs12050230	Primary	SMEK1	intronic	0.03	78	0	0.358	++	0.464	-0.034	0.006	2.55e-08	0.37	-0.025	0.007	0.000118	SMEK1	SMEK1	SMEK1 [nearest(intronic) / Non_PAN_ABC (Adp; LIV)]
EUR-meta-200	14:91918127 - 14:92018127	EAS/EUR	14:91968313:G:A	rs2896177	Primary	SMEK1	intronic	0.04	77	0	0.69	--	0.497	-0.033	0.006	3.88e-08	0.541	-0.037	0.006	9.13e-09	CCDC88C;SMEK1	SMEK1	CCDC88C [Pan-related <PAN_ABC (PAN_Nasser)> / Non_PAN_ABC (Adp; LIV; MuSc; ADR; Brain; SI; Co); Non_PAN_SMR <Pos_Exp (Brain)>] / SMEK1 [nearest(intronic) / Non_PAN_ABC (Adp; LIV)]
EAS-meta-223	14:101205172 - 14:101305172	EAS	14:101255172:A:G	rs73347525	Primary	DLK1(+53.6kb)	intergenic	1	1	41.7	0.19	++	0.252	-0.06	0.008	1.49e-14	0.194	-0.045	0.009	1.4e-07	DLK1	DLK1	DLK1 [nearest(intergenic)]
EAS-meta-224	14:103327321 - 14:103427321	EAS/EUR	14:103376031:C:T	rs4906272	Primary	TRAF3	3UTR	0.16	48	0	0.525	++	0.376	0.036	0.006	4.21e-09	0.166	0.043	0.009	6.58e-07	TRAF3;AMN	TRAF3	TRAF3 [nearest(3UTR) / Non_PAN_SMR <Pos_Exp (Blood)>] / AMN [Non_PAN_ABC (Co)]
EUR-meta-201	14:103327321 - 14:103427321	EAS/EUR	14:103858673:G:A	rs3783394	Primary	MARK3	intronic	0.03	88	85.4	0.00891	--	0.158	-0.01	0.008	0.221	0.348	-0.038	0.007	1.42e-08	CKB;BAG5;EIF5;MARK3;TRMT61A	CKB	CKB [rs1803283 [VEP_Medium: R2 (EAS:EUR=0.76:0.94)] / Very-Strongly-Pan-related <PAN_ABC (beta; alpha; acinar; ductal; PAN_Nasser)> / Non_PAN_ABC (Adp; LIV; MuSc; THY; ADR; Brain; SI; Co)] / BAG5 [Very-Strongly-Pan-related <PAN_ABC (beta; alpha; ductal; PAN_Nasser)> / Non_PAN_ABC (Adp; LIV; MuSc; THY; Brain; SI)] / EIF5 [Strongly-Pan-related <PAN_ABC (alpha; acinar; PAN_Nasser)> / Non_PAN_ABC (Ad…
EAS-meta-225	15:28457131 - 15:28557131	EAS	15:28506833:G:A	rs16950949	Primary	HERC2	intronic	0.19	15	81.8	0.0191	--	0.262	-0.042	0.008	2.62e-08	0.076	-0.007	0.013	0.598	HERC2;OCA2	HERC2	HERC2 [nearest(intronic) / rs201872292 [VEP_Low: R2 (EAS:EUR=0.99:0.94)] / Non_PAN_SMR <Neg_Exp (Brain)>] / OCA2 [Non_PAN_ABC (MuSc)]
EAS-meta-226	15:38778140 - 15:38878140	EAS/EUR	15:38828140:G:T	rs8043085	Primary	RASGRP1	intronic	0.3	10	0	0.421	++	0.439	0.048	0.006	3.56e-15	0.23	0.04	0.008	1.17e-07	RASGRP1	RASGRP1	RASGRP1 [nearest(intronic)]
EUR-meta-203	15:38778140 - 15:38878140	EAS/EUR	15:38834033:C:T	rs8032939	Secondary	RASGRP1	intronic	NA	NA	6.8	0.3	--	0.411	-0.032	0.006	2.9e-07	0.753	-0.042	0.007	1.88e-08	RASGRP1	RASGRP1	RASGRP1 [nearest(intronic) / Non_PAN_ABC (SI)]
EUR-meta-202	15:38778140 - 15:38878140	EAS/EUR	15:38873115:C:T	rs34715063	Primary	RASGRP1(+15.3kb)	intergenic	0.5	2	NA	NA	?-	NA	NA	NA	NA	0.878	-0.077	0.01	8.4e-15	RASGRP1	RASGRP1	RASGRP1 [nearest(intergenic)]
EAS-meta-227	15:40569743 - 15:40669743	EAS	15:40615872:G:C	rs12907887	Primary	C15orf52(-7.8kb)	intergenic	0.79	2	92.8	0.000193	++	0.223	0.075	0.007	8.5e-24	0.109	0.027	0.01	0.00844	C15orf52;C15orf56;DISP2;INAFM2;IVD	C15orf52	C15orf52 [nearest(intergenic) / Very-Strongly-Pan-related <PAN_ABC (beta; alpha; acinar; ductal; PAN_Nasser)> / Non_PAN_ABC (Adp; LIV; MuSc; THY; ADR; Brain; Co); Non_PAN_SMR <Neg_Exp (THY; PIT)>] / C15orf56 [Very-Strongly-Pan-related <PAN_ABC (beta; alpha; acinar; ductal)> / Non_PAN_ABC (Adp; MuSc; Co)] / DISP2 [Very-Strongly-Pan-related <PAN_ABC (beta; alpha)> / Non_PAN_ABC (Adp; LIV; MuSc; Bra…
EAS-meta-228	15:40569743 - 15:40669743	EAS	15:40418598:G:C	rs8031450	Secondary	BMF(+17.5kb)	intergenic	NA	NA	90.6	0.0011	++	0.212	0.041	0.008	8.49e-08	0.741	0.006	0.007	0.375	AC021755.3;BMF;C15orf52	BMF	AC021755.3 [Non_PAN_SMR <Pos_Exp (Brain)>] / BMF [nearest(intergenic)] / C15orf52 [Non_PAN_SMR <Neg_Exp (THY; PIT)>]
EUR-meta-204	15:41751512 - 15:41851512	EUR	15:41801512:G:T	rs2289739	Primary	LTK	intronic	0.25	21	92.6	0.00023	++	0.17	0.008	0.008	0.339	0.356	0.047	0.007	2.58e-12	LTK;RPAP1;MAPKBP1;MGA;RP11-107F6.3	LTK	LTK [nearest(intronic) / Non_PAN_SMR <Pos_Exp (Co) / Neg_Exp (THY)>] / RPAP1 [Pan-related <PAN-SMR (Pos_Exp)> / Non_PAN_SMR <Pos_Exp (Adp-Vis; MuSc; SI; Co; Blood) / Neg_Exp (THY; Brain)>] / MAPKBP1 [Non_PAN_SMR <Neg_Exp (Brain; Blood)>] / MGA [Non_PAN_SMR <Pos_Exp (Blood)>] / RP11-107F6.3 [Non_PAN_SMR <Pos_Exp (Blood)>]
EAS-meta-229	15:52537740 - 15:52637740	EAS	15:52587740:G:T	rs149336329	Primary	MYO5C	intronic	1	1	64.8	0.0917	--	0.051	-0.114	0.015	1.46e-14	0.044	-0.077	0.016	2.09e-06	MYO5C;MYO5A	MYO5C	MYO5C [nearest(intronic) / Very-Strongly-Pan-related <PAN_ABC (beta; acinar; ductal; PAN_Nasser)> / Non_PAN_ABC (LIV; MuSc; THY; ADR; Brain; SI; Co); Non_PAN_SMR <Neg_Exp (LIV; THY; PIT; Blood)>] / MYO5A [Pan-related <PAN_ABC (PAN_Nasser)>]
EUR-meta-205	15:53041553 - 15:53141553	EUR	15:53091553:C:T	rs2456530	Primary	ONECUT1(+8.3kb)	intergenic	0.16	38	92.2	0.000345	++	0.494	0.013	0.006	0.0332	0.126	0.054	0.01	2.07e-08	ONECUT1	ONECUT1	ONECUT1 [nearest(intergenic) / Non_PAN_SMR <Pos_Exp (Brain)>]
EUR-meta-206	15:57302893 - 15:57402893	EUR	15:57469927:C:A	rs144801310	Primary	TCF12	intronic	0.06	139	NA	NA	?-	NA	NA	NA	NA	0.966	-0.101	0.018	4.01e-08	TCF12;LOC145783;MNS1;PRTG;ZNF280D	TCF12	TCF12 [nearest(intronic) / rs12438244 [VEP_High: R2 (EAS:EUR=ND:0.9)] / Pan-related <PAN_ABC (ductal; PAN_Nasser)> / Non_PAN_ABC (Adp; LIV; MuSc; ADR; Brain)] / LOC145783 [Strongly-Pan-related <PAN_ABC (acinar; ductal)>] / MNS1 [Pan-related <PAN_ABC (PAN_Nasser)> / Non_PAN_ABC (Adp; LIV; MuSc; ADR; Brain)] / PRTG [Pan-related <PAN_ABC (PAN_Nasser)> / Non_PAN_ABC (LIV; MuSc; Brain)] / ZNF280D [Pan…
EAS-meta-230	15:62349093 - 15:62449093	EAS/EUR	15:62394264:G:C	rs8037894	Primary	C2CD4A(+31.1kb)	intergenic	0.17	10	91.8	0.000485	--	0.403	-0.078	0.006	8.12e-38	0.435	-0.047	0.006	6.29e-13	C2CD4A;VPS13C;C2CD4B;RP11-299H22.5	C2CD4A	C2CD4A [nearest(intergenic) / Very-Strongly-Pan-related <PAN_ABC (beta; alpha)> / Non_PAN_ABC (MuSc; Brain)] / VPS13C [Non_PAN_ABC (MuSc; Brain); Non_PAN_SMR <Pos_Exp (Blood) / Neg_Exp (Adp-Sub; THY; Brain; PIT)>] / C2CD4B [Non_PAN_ABC (MuSc; SI)] / RP11-299H22.5 [Non_PAN_ABC (MuSc)]
EUR-meta-207	15:62349093 - 15:62449093	EAS/EUR	15:62399093:A:C	rs11856307	Primary	C2CD4A(+36kb)	intergenic	0.16	14	91.5	0.000589	++	0.406	-0.077	0.006	1.64e-37	0.429	-0.047	0.006	4.48e-13	C2CD4A	C2CD4A	C2CD4A [nearest(intergenic) / Very-Strongly-Pan-related <PAN_ABC (beta)>]
EUR-meta-208	15:64062732 - 15:64162732	EUR	15:63871292:C:T	rs7178762	Primary	USP3	intronic	0.13	82	18.6	0.268	--	0.079	-0.024	0.011	0.0276	0.536	-0.039	0.006	1.37e-09	USP3;APH1B;CA12;FBXL22;HERC1	USP3	USP3 [nearest(intronic) / Very-Strongly-Pan-related <PAN_ABC (beta; alpha; acinar; ductal; PAN_Nasser)> / Non_PAN_ABC (Adp; LIV; MuSc; THY; ADR; Brain; SI; Co)] / APH1B [Strongly-Pan-related <PAN_ABC (acinar; PAN_Nasser)> / Non_PAN_ABC (Adp; LIV; MuSc; ADR; Brain; SI; Co)] / CA12 [Strongly-Pan-related <PAN_ABC (acinar; PAN_Nasser)> / Non_PAN_ABC (Brain; SI; Co)] / FBXL22 [Pan-related <PAN_ABC (al…
EAS-meta-231	15:68030886 - 15:68130886	EAS/EUR	15:68080886:T:A	rs4776970	Primary	MAP2K5	intronic	0.59	32	0	0.645	++	0.223	0.042	0.007	2.56e-09	0.642	0.038	0.007	1.69e-08	MAP2K5;SKOR1	MAP2K5	MAP2K5 [nearest(intronic)] / SKOR1 [Non_PAN_SMR <Neg_Exp (THY)>]
EUR-meta-209	15:68030886 - 15:68130886	EAS/EUR	15:68080886:T:A	rs4776970	Primary	MAP2K5	intronic	0.07	14	0	0.645	++	0.223	0.042	0.007	2.56e-09	0.642	0.038	0.007	1.69e-08	MAP2K5	MAP2K5	MAP2K5 [nearest(intronic)]
EAS-meta-232	15:75764388 - 15:75864388	EAS/EUR	15:75797188:TG:T	rs374894545	Primary	PTPN9	intronic	0.07	44	NA	NA	-?	0.392	-0.045	0.007	2.05e-11	NA	NA	NA	NA	MAN2C1;PTPN9;CTD-2323K18.1;IMP3;RP11-817O13.6	PTPN9	MAN2C1 [Pan-related <PAN-SMR (Pos_Exp)> / Non_PAN_SMR <Pos_Exp (Adp-Sub; Adp-Vis; MuSc; THY; PIT) / Neg_Exp (LIV; ADR; Brain; SI; KID; Blood); Both_Exp (Co)>] / PTPN9 [nearest(intronic)] / CTD-2323K18.1 [Non_PAN_SMR <Pos_Exp (Blood)>] / IMP3 [Non_PAN_SMR <Neg_Exp (Blood)>] / RP11-817O13.6 [Non_PAN_SMR <Neg_Exp (Blood)>]
EUR-meta-210	15:75764388 - 15:75864388	EAS/EUR	15:75932129:G:T	rs13737	Primary	IMP3	exonic	0.16	45	72.9	0.0546	--	0.427	-0.029	0.006	2.28e-06	0.241	-0.048	0.007	1.77e-10	IMP3;SNUPN;PTPN9;SIN3A;SNX33	IMP3	IMP3 [nearest(exonic) / Very-Strongly-Pan-related <PAN_ABC (beta; alpha; acinar; ductal; PAN_Nasser)> / Non_PAN_ABC (Adp; LIV; MuSc; THY; ADR; Brain; SI; Co); Non_PAN_SMR <Neg_Exp (Blood)>] / SNUPN [Very-Strongly-Pan-related <PAN_ABC (beta; alpha; acinar; ductal; PAN_Nasser)> / Non_PAN_ABC (Adp; LIV; MuSc; THY; ADR; Brain; SI; Co); Non_PAN_SMR <Neg_Exp (Co; Blood)>] / PTPN9 [Pan-related <PAN_ABC …
EAS-meta-233	15:77732335 - 15:77832335	EAS/EUR	15:77782335:A:G	rs12910361	Primary	HMG20A(+4.4kb)	intergenic	0.15	50	19.9	0.264	--	0.398	0.071	0.006	6.53e-32	0.707	0.081	0.007	3.95e-31	HMG20A;PEAK1;CTD-2632K10.1;PSTPIP1;TSPAN3	HMG20A	HMG20A [nearest(intergenic) / Pan-related <PAN_ABC (PAN_Nasser)> / Non_PAN_ABC (Adp; LIV; MuSc; ADR; Brain; Co); Non_PAN_SMR <Pos_Exp (Adp-Sub; Adp-Vis; THY; Brain; PIT; Blood)>] / PEAK1 [Pan-related <PAN_ABC (PAN_Nasser)> / Non_PAN_ABC (Adp; LIV; MuSc; ADR; Brain; Co); Non_PAN_SMR <Pos_Exp (Brain; Blood)>] / CTD-2632K10.1 [Pan-related <PAN_ABC (PAN_Nasser)> / Non_PAN_ABC (Co)] / PSTPIP1 [Pan-rel…
EUR-meta-211	15:77732335 - 15:77832335	EAS/EUR	15:77782335:A:G	rs12910361	Primary	HMG20A(+4.4kb)	intergenic	0.14	24	19.9	0.264	--	0.398	0.071	0.006	6.53e-32	0.707	0.081	0.007	3.95e-31	HMG20A;PEAK1;CTD-2632K10.1;PSTPIP1;TSPAN3	HMG20A	HMG20A [nearest(intergenic) / Pan-related <PAN_ABC (PAN_Nasser)> / Non_PAN_ABC (Adp; LIV; MuSc; ADR; Brain; Co); Non_PAN_SMR <Pos_Exp (Adp-Sub; Adp-Vis; THY; Brain; PIT; Blood)>] / PEAK1 [Pan-related <PAN_ABC (PAN_Nasser)> / Non_PAN_ABC (Adp; LIV; MuSc; ADR; Brain; Co); Non_PAN_SMR <Pos_Exp (Brain; Blood)>] / CTD-2632K10.1 [Pan-related <PAN_ABC (PAN_Nasser)> / Non_PAN_ABC (Co)] / PSTPIP1 [Pan-rel…
EAS-meta-234	15:90376689 - 15:90476689	EAS/EUR	15:90422986:C:T	rs4932264	Primary	AP3S2:C15orf38-AP3S2	intronic:intronic	0.25	15	0	0.522	++	0.209	0.058	0.008	1.76e-14	0.27	0.065	0.007	3.38e-19	AP3S2;ANPEP;C15orf38-AP3S2;C15orf38;MESP2	AP3S2	AP3S2 [nearest(intronic:intronic) / rs12440156 [VEP_Medium: R2 (EAS:EUR=0.98:0.89)] / Pan-related <PAN-SMR (Neg_Exp)> / Non_PAN_ABC (MuSc; SI); Non_PAN_SMR <Pos_Exp (Brain; Blood) / Neg_Exp (Adp-Sub; Adp-Vis; LIV; MuSc; THY; ADR; PIT; SI; Co; KID)>] / ANPEP [Strongly-Pan-related <PAN_ABC (acinar)> / Non_PAN_ABC (Adp; LIV; MuSc; ADR; Brain; SI; Co)] / C15orf38-AP3S2 [rs12440156 [VEP_Medium: R2 (EA…
EUR-meta-212	15:90376689 - 15:90476689	EAS/EUR	15:90384045:T:C	rs2351707	Primary	C15orf38-AP3S2:AP3S2	intronic:intronic	0.52	33	0	0.356	--	0.209	0.055	0.007	1.16e-13	0.282	0.064	0.007	4.3e-20	ANPEP;AP3S2;C15orf38-AP3S2;C15orf38;MESP2	C15orf38-AP3S2	ANPEP [Strongly-Pan-related <PAN_ABC (acinar)> / Non_PAN_ABC (Adp; LIV; MuSc; ADR; Brain; SI; Co); Non_PAN_SMR <Neg_Exp (Blood)>] / AP3S2 [rs12440156 [VEP_Medium: R2 (EAS:EUR=0.95:0.91)] / Pan-related <PAN-SMR (Neg_Exp)> / Non_PAN_ABC (MuSc; SI); Non_PAN_SMR <Pos_Exp (Brain; Blood) / Neg_Exp (Adp-Sub; Adp-Vis; LIV; MuSc; THY; ADR; PIT; SI; Co; KID)>] / C15orf38-AP3S2 [nearest(intronic:intronic) /…
EAS-meta-235	15:91462067 - 15:91562067	EAS/EUR	15:91512067:G:A	rs2290203	Primary	PRC1	intronic	0.18	12	0	0.984	++	0.49	0.061	0.006	5.09e-24	0.205	0.06	0.008	1.45e-14	HDDC3;UNC45A;PRC1;RCCD1;VPS33B	UNC45A	HDDC3 [Very-Strongly-Pan-related <PAN_ABC (beta; alpha; ductal)> / Non_PAN_ABC (MuSc; Brain); Non_PAN_SMR <Pos_Exp (Adp-Sub; Adp-Vis; THY)>] / UNC45A [Very-Strongly-Pan-related <PAN_ABC (beta; alpha; ductal) / PAN-SMR (Pos_Exp)> / Non_PAN_ABC (MuSc; Brain); Non_PAN_SMR <Neg_Exp (THY)>] / PRC1 [nearest(intronic) / rs2285937 [VEP_Medium: R2 (EAS:EUR=0.88:0.37)] / Pan-related <PAN_ABC (PAN_Nasser)> …
EUR-meta-213	15:91462067 - 15:91562067	EAS/EUR	15:91511260:G:A	rs12910825	Primary	PRC1	intronic	0.3	6	0	0.849	--	0.004	-0.042	0.057	0.468	0.637	-0.052	0.007	4.7e-15	PRC1;RCCD1;VPS33B;HDDC3;UNC45A	PRC1	PRC1 [nearest(intronic) / Pan-related <PAN_ABC (PAN_Nasser)> / Non_PAN_ABC (MuSc; Brain; Co)] / RCCD1 [Pan-related <PAN-SMR (Pos_Exp)> / Non_PAN_ABC (MuSc; Brain); Non_PAN_SMR <Pos_Exp (Adp-Sub; Adp-Vis; THY; Brain; SI; Co; Blood)>] / VPS33B [Pan-related <PAN_ABC (PAN_Nasser)> / Non_PAN_ABC (MuSc; Brain); Non_PAN_SMR <Pos_Exp (Blood)>] / HDDC3 [Non_PAN_ABC (Brain)] / UNC45A [Non_PAN_ABC (Brain)]
EAS-meta-236	15:93782067 - 15:93882067	EAS	15:93825384:G:A	rs61021634	Primary	RGMA(+193kb)	intergenic	0.38	41	72.7	0.0557	++	0.44	0.047	0.007	1.38e-11	0.892	0.023	0.011	0.0326	RGMA;FAM174B;ST8SIA2	RGMA	RGMA [nearest(intergenic) / Non_PAN_ABC (Brain)] / FAM174B [Non_PAN_ABC (Brain)] / ST8SIA2 [Non_PAN_ABC (Brain)]
EAS-meta-237	15:99316409 - 15:99416409	EAS	15:99366409:A:G	rs79826452	Primary	IGF1R	intronic	0.8	33	0	0.5	++	0.115	-0.062	0.011	8.58e-09	0	-0.333	0.401	0.406	IGF1R	IGF1R	IGF1R [nearest(intronic)]
EUR-meta-214	16:250177 - 16:350177	EUR	16:295795:T:C	rs6600191	Primary	ITFG3	intronic	0.14	19	87.1	0.00535	++	0.401	-0.029	0.006	2.3e-06	0.175	-0.059	0.009	4.47e-12	ITFG3;ARHGDIG;FAM234A;HBQ1;RGS11	ITFG3	ITFG3 [nearest(intronic) / Non_PAN_SMR <Neg_Exp (Adp-Sub; Adp-Vis; MuSc; Blood)>] / ARHGDIG [Non_PAN_SMR <Neg_Exp (MuSc)>] / FAM234A [Non_PAN_SMR <Neg_Exp (Brain)>] / HBQ1 [Non_PAN_SMR <Neg_Exp (Blood)>] / RGS11 [Non_PAN_ABC (Co)]
EAS-meta-238	16:3533173 - 16:3633173	EAS	16:3647098:G:A	rs2240885	Primary	SLX4	intronic	0.54	5	0	0.398	++	0.395	0.04	0.006	2.34e-10	0.212	0.032	0.008	5.42e-05	SLX4;CLUAP1;DNASE1	SLX4	SLX4 [nearest(intronic)] / CLUAP1 [Non_PAN_SMR <Pos_Exp (THY; PIT; Blood)>] / DNASE1 [Non_PAN_SMR <Pos_Exp (Blood)>]
EAS-meta-239	16:20278666 - 16:20378666	EAS	16:20323168:G:A	rs117267808	Primary	GP2	intronic	0.75	3	90	0.00158	++	0.078	0.098	0.011	1.11e-18	0.019	0.014	0.024	0.563	GP2;ACSM5;GPRC5B;SYT17;UMOD	GP2	GP2 [nearest(intronic) / rs78193826 [VEP_Medium: R2 (EAS:EUR=0.96:ND)] / Strongly-Pan-related <PAN_ABC (acinar; PAN_Nasser)>] / ACSM5 [Pan-related <PAN_ABC (PAN_Nasser)>] / GPRC5B [Pan-related <PAN_ABC (PAN_Nasser)>] / SYT17 [Pan-related <PAN_ABC (PAN_Nasser)>] / UMOD [Pan-related <PAN_ABC (PAN_Nasser)>]
EAS-meta-240	16:20278666 - 16:20378666	EAS	16:20256661:C:T	rs13338474	Secondary	GP2(-64.2kb)	intergenic	NA	NA	0	0.509	--	0.219	-0.043	0.007	2.09e-09	0.051	-0.033	0.015	0.0261	GP2	GP2	GP2 [nearest(intergenic)]
EUR-meta-215	16:30043779 - 16:30143779	EUR	16:30033633:T:C	rs12325539	Primary	DOC2A	intronic	0.09	17	87.7	0.00437	--	0.36	0.015	0.006	0.0163	0.4	0.041	0.006	2.69e-10	FAM57B;INO80E;TMEM219;DOC2A;HIRIP3	FAM57B	FAM57B [Very-Strongly-Pan-related <PAN_ABC (beta)> / Non_PAN_ABC (ADR; Brain); Non_PAN_SMR <Pos_Exp (MuSc)>] / INO80E [Very-Strongly-Pan-related <PAN_ABC (beta; alpha; acinar; ductal; PAN_Nasser)> / Non_PAN_ABC (Adp; LIV; MuSc; THY; ADR; Brain; SI; Co); Non_PAN_SMR <Pos_Exp (Adp-Sub; Adp-Vis; THY; Brain; PIT; Co; Blood)>] / TMEM219 [Very-Strongly-Pan-related <PAN_ABC (beta; alpha; acinar; ductal;…
EAS-meta-241	16:53750954 - 16:53850954	EAS/EUR	16:53800954:T:C	rs1421085	Primary	FTO	intronic	0.23	5	0	0.893	--	0.162	0.123	0.008	2.49e-52	0.417	0.122	0.006	1.52e-78	FTO;CRNDE;IRX3;RPGRIP1L	FTO	FTO [nearest(intronic) / Pan-related <PAN_ABC (PAN_Nasser)> / Non_PAN_ABC (MuSc)] / CRNDE [Pan-related <PAN_ABC (PAN_Nasser)>] / IRX3 [Pan-related <PAN_ABC (PAN_Nasser)>] / RPGRIP1L [Pan-related <PAN_ABC (PAN_Nasser)> / Non_PAN_ABC (MuSc)]
EUR-meta-216	16:53750954 - 16:53850954	EAS/EUR	16:53809123:C:T	rs55872725	Primary	FTO	intronic	0.17	6	0	0.931	++	0.161	0.121	0.008	2.15e-50	0.418	0.122	0.006	8.51e-79	FTO;CRNDE;IRX3;RPGRIP1L;AC007342.6	FTO	FTO [nearest(intronic) / Pan-related <PAN_ABC (PAN_Nasser)> / Non_PAN_ABC (MuSc); Non_PAN_SMR <Pos_Exp (MuSc)>] / CRNDE [Pan-related <PAN_ABC (PAN_Nasser)>] / IRX3 [Pan-related <PAN_ABC (PAN_Nasser)>] / RPGRIP1L [Pan-related <PAN_ABC (PAN_Nasser)> / Non_PAN_ABC (MuSc)] / AC007342.6 [Non_PAN_SMR <Pos_Exp (Brain)>]
EUR-meta-217	16:69700849 - 16:69800849	EUR	16:69651866:C:T	rs862320	Primary	NFAT5	intronic	0.09	18	0	0.468	--	0.124	-0.035	0.009	0.000184	0.423	-0.043	0.006	2.55e-11	NFAT5;CYB5B;TERF2;NOB1;NQO1	NFAT5	NFAT5 [nearest(intronic) / Pan-related <PAN_ABC (PAN_Nasser)> / Non_PAN_SMR <Neg_Exp (THY)>] / CYB5B [Pan-related <PAN_ABC (PAN_Nasser)>] / TERF2 [Pan-related <PAN_ABC (PAN_Nasser)>] / NOB1 [Non_PAN_ABC (Adp)] / NQO1 [Non_PAN_ABC (Adp)]
EAS-meta-242	16:72055965 - 16:72155965	EAS	16:72022534:C:T	rs12600132	Primary	DHODH(-20kb)	intergenic	0.08	24	95.9	7.09e-07	+-	0.435	0.035	0.006	2.34e-09	0.398	-0.008	0.007	0.203	DHODH	DHODH	DHODH [nearest(intergenic)]
EAS-meta-243	16:73050308 - 16:73150308	EAS	16:73100308:T:C	rs6416749	Primary	ZFHX3(+6.7kb)	intergenic	0.92	3	74.7	0.0467	--	0.373	0.048	0.007	1.17e-12	0.324	0.028	0.007	8.46e-05	ZFHX3;HCCAT5	ZFHX3	ZFHX3 [nearest(intergenic) / Non_PAN_ABC (Brain)] / HCCAT5 [Non_PAN_ABC (Brain)]
EAS-meta-244	16:75193657 - 16:75293657	EAS/EUR	16:75254584:C:T	rs4888360	Primary	CTRB1	intronic	0.56	8	94.7	1.44e-05	--	0.032	-0.112	0.018	1.33e-09	0.295	-0.027	0.007	0.00015	CTRB1;CTRB2	CTRB1	CTRB1 [nearest(intronic) / Strongly-Pan-related <PAN_ABC (acinar; PAN_Nasser)>] / CTRB2 [Strongly-Pan-related <PAN_ABC (acinar; PAN_Nasser)>]
EUR-meta-218	16:75193657 - 16:75293657	EAS/EUR	16:75243657:G:C	rs72802358	Primary	CTRB2	upstream	0.69	7	34.6	0.216	--	0.027	-0.085	0.02	3.48e-05	0.103	-0.114	0.011	2.22e-26	BCAR1;CTRB1;CTRB2;LDHD;ZFP1	CTRB2	BCAR1 [Pan-related <PAN_ABC (PAN_Nasser)> / Non_PAN_SMR <Neg_Exp (Brain; Blood)>] / CTRB1 [Strongly-Pan-related <PAN_ABC (acinar; PAN_Nasser)> / Non_PAN_ABC (MuSc; ADR)] / CTRB2 [nearest(upstream) / Strongly-Pan-related <PAN_ABC (acinar; ductal; PAN_Nasser)> / Non_PAN_ABC (MuSc; ADR)] / LDHD [Pan-related <PAN_ABC (PAN_Nasser)>] / ZFP1 [Pan-related <PAN_ABC (PAN_Nasser)>]
EAS-meta-245	16:81484790 - 16:81584790	EAS/EUR	16:81534790:C:T	rs2925979	Primary	CMIP	intronic	0.99	1	64	0.0955	++	0.374	0.039	0.006	6.47e-10	0.299	0.055	0.007	7.07e-15	CMIP	CMIP	CMIP [nearest(intronic) / Pan-related <PAN_ABC (PAN_Nasser)> / Non_PAN_ABC (MuSc)]
EUR-meta-219	16:81484790 - 16:81584790	EAS/EUR	16:81534790:C:T	rs2925979	Primary	CMIP	intronic	0.96	1	64	0.0955	++	0.374	0.039	0.006	6.47e-10	0.299	0.055	0.007	7.07e-15	CMIP	CMIP	CMIP [nearest(intronic) / Pan-related <PAN_ABC (PAN_Nasser)> / Non_PAN_ABC (MuSc)]
EAS-meta-246	16:89514055 - 16:89614055	EAS/EUR	16:89676635:G:A	rs75959543	Primary	DPEP1(-3.1kb)	intergenic	0.28	21	7.8	0.298	-+	0.449	-0.039	0.006	7.65e-10	0.015	0.014	0.05	0.787	CHMP1A;SPATA33;CDK10;DPEP1;RPL13	CHMP1A	CHMP1A [Pan-related <PAN_ABC (PAN_Nasser)> / Non_PAN_SMR <Pos_Exp (Blood)>] / SPATA33 [Pan-related <PAN_ABC (PAN_Nasser)> / Non_PAN_SMR <Pos_Exp (Brain) / Neg_Exp (Blood)>] / CDK10 [Pan-related <PAN_ABC (PAN_Nasser)>] / DPEP1 [nearest(intergenic) / Non_PAN_ABC (LIV)] / RPL13 [Pan-related <PAN_ABC (PAN_Nasser)>]
EUR-meta-220	16:89514055 - 16:89614055	EAS/EUR	16:89564055:T:A	rs12920022	Primary	SPG7	intronic	0.83	3	71.3	0.0622	++	0.119	0.028	0.01	0.00367	0.158	0.053	0.009	1e-08	SPG7;ANKRD11;RPL13;CHMP1A;LOC101927817	SPG7	SPG7 [nearest(intronic) / Pan-related <PAN_ABC (ductal; PAN_Nasser)> / Non_PAN_ABC (Adp; LIV; MuSc; THY; ADR; Brain; SI; Co)] / ANKRD11 [Pan-related <PAN_ABC (ductal; PAN_Nasser)> / Non_PAN_ABC (Adp; LIV; MuSc; THY; ADR; Brain; SI; Co)] / RPL13 [Non_PAN_ABC (LIV; MuSc; ADR; Brain; SI; Co); Non_PAN_SMR <Pos_Exp (Blood)>] / CHMP1A [Non_PAN_ABC (MuSc)] / LOC101927817 [NA]
EAS-meta-247	17:3778086 - 17:3878086	EAS/EUR	17:3828086:C:G	rs1043246	Primary	ATP2A3	3UTR	0.93	4	30.8	0.229	--	0.455	0.042	0.007	6.66e-09	0.155	0.057	0.01	4.21e-09	ATP2A3	ATP2A3	ATP2A3 [nearest(3UTR)]
EUR-meta-221	17:3778086 - 17:3878086	EAS/EUR	17:3988451:T:C	rs8071043	Primary	ZZEF1	intronic	0.3	31	89.7	0.00184	--	0.245	0.021	0.007	0.00472	0.326	0.052	0.007	1.53e-14	ZZEF1;ANKFY1;UBE2G1;CYB5D2;RABEP1	ZZEF1	ZZEF1 [nearest(intronic) / Non_PAN_ABC (Adp; Brain); Non_PAN_SMR <Pos_Exp (MuSc; Brain; Blood)>] / ANKFY1 [Non_PAN_ABC (Brain); Non_PAN_SMR <Pos_Exp (Blood)>] / UBE2G1 [Non_PAN_ABC (Brain); Non_PAN_SMR <Pos_Exp (Brain)>] / CYB5D2 [Non_PAN_ABC (Adp; Brain)] / RABEP1 [Non_PAN_ABC (Brain)]
EAS-meta-248	17:6903558 - 17:7003558	EAS	17:6953781:C:T	rs186568031	Primary	SLC16A11(+6.5kb)	intergenic	0.2	9	NA	NA	+?	0.094	0.113	0.01	6.13e-28	NA	NA	NA	NA	SLC16A11;C17orf49;RNASEK;SLC16A13	SLC16A11	SLC16A11 [nearest(intergenic) / rs75493593 [VEP_Medium: R2 (EAS:EUR=0.91:0.92)] / Pan-related <PAN_ABC (alpha; PAN_Nasser)> / Non_PAN_ABC (Adp; LIV; MuSc; THY); Non_PAN_SMR <Pos_Exp (THY)>] / C17orf49 [Non_PAN_SMR <Pos_Exp (Brain; Blood)>] / RNASEK [Non_PAN_SMR <Pos_Exp (THY; Co; Blood) / Neg_Exp (Adp-Sub)>] / SLC16A13 [Non_PAN_ABC (LIV; THY)]
EAS-meta-249	17:6903558 - 17:7003558	EAS	17:7352163:T:C	rs17806566	Secondary	CHRNB1	intronic	NA	NA	0	0.629	--	0.129	0.042	0.009	3.6e-06	0.039	0.034	0.016	0.0365	CHRNB1;POLR2A;TMEM102;TMEM256;ZBTB4	CHRNB1	CHRNB1 [nearest(intronic) / Very-Strongly-Pan-related <PAN_ABC (beta; acinar; ductal; PAN_Nasser)> / Non_PAN_ABC (Adp; LIV; MuSc; THY; ADR; Brain; SI; Co)] / POLR2A [Very-Strongly-Pan-related <PAN_ABC (beta; alpha; acinar; ductal; PAN_Nasser)> / Non_PAN_ABC (Adp; LIV; MuSc; THY; ADR; Brain; SI; Co)] / TMEM102 [Strongly-Pan-related <PAN_ABC (acinar; ductal; PAN_Nasser)> / Non_PAN_ABC (Adp; LIV; Mu…
EUR-meta-222	17:9743756 - 17:9843756	EUR	17:9793756:G:A	rs55973554	Primary	GLP2R	3UTR	0.07	77	NA	NA	?+	NA	NA	NA	NA	0.322	0.039	0.007	1e-08	GLP2R	GLP2R	GLP2R [nearest(3UTR) / rs17681684 [VEP_Low: R2 (EAS:EUR=1:0.97)]]
EUR-meta-223	17:17701478 - 17:17801478	EUR	17:17661802:A:G	rs4925109	Primary	RAI1	intronic	0.62	7	93.8	5.91e-05	++	0.149	-0.003	0.009	0.734	0.682	-0.048	0.007	5.65e-12	RAI1;AC122129.1;GID4;RAI1-AS1;SREBF1	RAI1	RAI1 [nearest(intronic)] / AC122129.1 [Non_PAN_SMR <Neg_Exp (MuSc)>] / GID4 [Non_PAN_SMR <Pos_Exp (Blood)>] / RAI1-AS1 [Non_PAN_ABC (Brain)] / SREBF1 [Non_PAN_SMR <Pos_Exp (Blood)>]
EAS-meta-250	17:29603293 - 17:29703293	EAS	17:29642430:T:C	rs7502556	Primary	NF1	intronic	0.17	66	46.6	0.171	++	0.463	-0.043	0.006	1.67e-12	0.613	-0.03	0.006	2.83e-06	EVI2A;EVI2B;NF1;OMG	EVI2A	EVI2A [rs1129506 [VEP_Medium: R2 (EAS:EUR=0.98:0.94)] / Pan-related <PAN_ABC (PAN_Nasser)> / Non_PAN_ABC (Adp; MuSc; Brain; SI; Co); Non_PAN_SMR <Pos_Exp (Brain; Blood)>] / EVI2B [Pan-related <PAN_ABC (PAN_Nasser)> / Non_PAN_ABC (Adp; MuSc; ADR; Brain; SI; Co); Non_PAN_SMR <Pos_Exp (Blood)>] / NF1 [nearest(intronic) / Non_PAN_SMR <Pos_Exp (Brain; Blood) / Neg_Exp (LIV; THY)>] / OMG [Non_PAN_ABC (…
EAS-meta-251	17:36052381 - 17:36152381	EAS/EUR	17:36101586:C:A	rs8064454	Primary	HNF1B	intronic	0.91	2	95.7	1.53e-06	++	0.3	0.115	0.007	2.47e-68	0.47	0.069	0.007	2.74e-23	HNF1B;DDX52;SYNRG;YWHAEP7	HNF1B	HNF1B [nearest(intronic) / Non_PAN_ABC (Co)] / DDX52 [Non_PAN_ABC (Co)] / SYNRG [Non_PAN_ABC (Co)] / YWHAEP7 [Non_PAN_ABC (Co)]
EAS-meta-252	17:36052381 - 17:36152381	EAS/EUR	17:36059385:C:G	rs12938438	Secondary	HNF1B	intronic	NA	NA	89.2	0.0023	--	0.206	0.066	0.008	7.26e-18	0.323	0.034	0.007	6.42e-07	HNF1B	HNF1B	HNF1B [nearest(intronic)]
EUR-meta-224	17:36052381 - 17:36152381	EAS/EUR	17:36099952:A:T	rs10908278	Primary	HNF1B	intronic	0.86	2	94.7	1.39e-05	--	0.285	0.117	0.007	4.12e-63	0.483	0.075	0.007	5.25e-29	DDX52;HNF1B;SYNRG;DHRS11;MRM1	HNF1B	DDX52 [Strongly-Pan-related <PAN_ABC (alpha; acinar; PAN_Nasser)> / Non_PAN_ABC (LIV; Co)] / HNF1B [nearest(intronic) / Strongly-Pan-related <PAN_ABC (acinar; ductal; PAN_Nasser)> / Non_PAN_ABC (Adp; LIV; Brain; SI; Co)] / SYNRG [Strongly-Pan-related <PAN_ABC (alpha; acinar; PAN_Nasser)> / Non_PAN_ABC (LIV; Co)] / DHRS11 [Pan-related <PAN_ABC (PAN_Nasser)> / Non_PAN_ABC (Co)] / MRM1 [Pan-related …
EUR-meta-227	17:36052381 - 17:36152381	EAS/EUR	17:36064897:A:G	rs2107133	Secondary	HNF1B	intronic	NA	NA	91.9	0.000447	-+	0.008	0.146	0.059	0.0136	0.127	-0.064	0.01	4.02e-11	HNF1B	HNF1B	HNF1B [nearest(intronic)]
EUR-meta-226	17:36052381 - 17:36152381	EAS/EUR	17:36043653:C:T	rs3094515	Secondary	HNF1B(-2.8kb)	intergenic	NA	NA	81.1	0.0215	--	0.381	-0.024	0.006	0.000208	0.37	-0.046	0.007	1.34e-10	HNF1B	HNF1B	HNF1B [nearest(intergenic)]
EUR-meta-225	17:36052381 - 17:36152381	EAS/EUR	17:36046451:G:C	rs10962	Secondary	HNF1B	3UTR	NA	NA	32.8	0.223	++	0.238	0.056	0.007	2.84e-14	0.23	0.043	0.008	5.03e-08	HNF1B	HNF1B	HNF1B [nearest(3UTR)]
EAS-meta-253	17:40730847 - 17:40830847	EAS/EUR	17:40780847:C:T	rs12601457	Primary	TUBG1(+13.6kb)	intergenic	0.02	156	47.3	0.168	++	0.442	0.034	0.006	1.94e-08	0.279	0.047	0.007	4.48e-11	COASY;FAM134C;MLX;TUBG1;TUBG2	MLX	COASY [rs615942 [VEP_Low: R2 (EAS:EUR=0.83:0.31)] / Very-Strongly-Pan-related <PAN_ABC (beta; alpha; acinar; ductal; PAN_Nasser)> / Non_PAN_ABC (Adp; LIV; MuSc; THY; ADR; Brain; SI; Co)] / FAM134C [Very-Strongly-Pan-related <PAN_ABC (beta; alpha; PAN_Nasser)> / Non_PAN_ABC (LIV; MuSc; Brain; SI); Non_PAN_SMR <Pos_Exp (Blood)>] / MLX [rs665268 [VEP_Medium: R2 (EAS:EUR=0.9:0.99)] / Very-Strongly-Pa…
EUR-meta-228	17:40730847 - 17:40830847	EAS/EUR	17:40731411:G:C	rs34855406	Primary	FAM134C	downstream	0.17	18	51.4	0.151	++	0.271	0.035	0.007	6.41e-07	0.275	0.049	0.007	5.89e-12	MLX;COASY;FAM134C;LOC108783654;TUBG2	MLX	MLX [rs665268 [VEP_Medium: R2 (EAS:EUR=0.42:0.97)] / Very-Strongly-Pan-related <PAN_ABC (beta; alpha; PAN_Nasser)> / Non_PAN_ABC (MuSc; Brain); Non_PAN_SMR <Pos_Exp (Blood)>] / COASY [Very-Strongly-Pan-related <PAN_ABC (beta; alpha; PAN_Nasser)> / Non_PAN_ABC (Adp; MuSc; Brain; SI; Co)] / FAM134C [nearest(downstream) / Pan-related <PAN_ABC (PAN_Nasser)> / Non_PAN_SMR <Pos_Exp (MuSc)>] / LOC108783…
EUR-meta-229	17:47010322 - 17:47110322	EUR	17:47060322:C:A	rs35895680	Primary	GIP(+14.4kb)	intergenic	0.06	94	0	0.77	--	0.033	-0.05	0.019	0.00914	0.323	-0.055	0.007	1.08e-15	ATP5G1;ATP5MC1;GIP;RP11-463M16.4;SNF8	GIP	ATP5G1 [Non_PAN_SMR <Pos_Exp (THY) / Neg_Exp (MuSc; PIT; Co; Blood)>] / ATP5MC1 [Non_PAN_SMR <Neg_Exp (Brain)>] / GIP [nearest(intergenic)] / RP11-463M16.4 [Non_PAN_SMR <Pos_Exp (MuSc; THY; ADR; PIT; Co)>] / SNF8 [Non_PAN_SMR <Neg_Exp (THY; ADR; Brain; Blood)>]
EUR-meta-230	17:62152689 - 17:62252689	EUR	17:62202689:C:T	rs58642235	Primary	ERN1	intronic	0.39	3	NA	NA	?-	NA	NA	NA	NA	0.861	-0.057	0.009	1.9e-09	ERN1	ERN1	ERN1 [nearest(intronic) / Non_PAN_SMR <Pos_Exp (Blood)>]
EAS-meta-254	17:65870508 - 17:65970508	EAS/EUR	17:65643646:C:T	rs80320393	Primary	PITPNC1	intronic	0.12	148	76.2	0.0405	++	0.031	0.104	0.019	2.83e-08	0.075	0.059	0.012	1.4e-06	PITPNC1;ABCA6;APOH;MAP2K6;RP11-4F22.2	PITPNC1	PITPNC1 [nearest(intronic) / Non_PAN_ABC (Co)] / ABCA6 [Non_PAN_ABC (Co)] / APOH [Non_PAN_ABC (Co)] / MAP2K6 [Non_PAN_ABC (Co)] / RP11-4F22.2 [Non_PAN_ABC (Co)]
EUR-meta-231	17:65870508 - 17:65970508	EAS/EUR	17:65892507:C:G	rs61676547	Primary	BPTF	intronic	0.07	124	82.5	0.0167	++	0.328	-0.028	0.006	1.36e-05	0.806	-0.052	0.008	7.42e-11	KPNA2;BPTF;C17orf58;LINC00674;LOC440461	KPNA2	KPNA2 [Very-Strongly-Pan-related <PAN_ABC (beta; alpha; acinar; ductal; PAN_Nasser)> / Non_PAN_ABC (Adp; LIV; MuSc; THY; ADR; Brain; SI; Co); Non_PAN_SMR <Pos_Exp (Brain)>] / BPTF [nearest(intronic) / Non_PAN_ABC (LIV; MuSc; Brain; SI; Co); Non_PAN_SMR <Pos_Exp (Brain)>] / C17orf58 [Very-Strongly-Pan-related <PAN_ABC (beta; alpha; acinar; ductal; PAN_Nasser)> / Non_PAN_ABC (Adp; LIV; MuSc; THY; A…
EAS-meta-255	17:73137119 - 17:73237119	EAS	17:73187031:CA:C	rs2074884889	Primary	SUMO2(+8kb)	intergenic	0.59	19	NA	NA	+?	0.348	-0.047	0.008	9.5e-09	NA	NA	NA	NA	SUMO2	SUMO2	SUMO2 [nearest(intergenic)]
EAS-meta-256	17:76739886 - 17:76839886	EAS	17:76800182:G:C	rs11649964	Primary	USP36	intronic	0.04	82	19	0.267	--	0.408	-0.037	0.006	1.51e-09	0.555	-0.028	0.006	1.66e-05	USP36;CYTH1	USP36	USP36 [nearest(intronic) / rs1057040 [VEP_Low: R2 (EAS:EUR=0.96:0.88)] / Pan-related <PAN-SMR (Neg_Exp)> / Non_PAN_ABC (Co); Non_PAN_SMR <Pos_Exp (Brain) / Neg_Exp (THY; ADR; Co)>] / CYTH1 [Pan-related <PAN_ABC (PAN_Nasser)> / Non_PAN_ABC (Adp; LIV; MuSc; Brain; SI; Co)]
EAS-meta-257	17:80555644 - 17:80655644	EAS	17:80605644:G:A	rs9788998	Primary	WDR45B	intronic	0.85	2	87.5	0.0047	++	0.48	0.036	0.006	4.79e-09	0.554	0.011	0.006	0.106	WDR45B;FN3K;FN3KRP;LOC101929552;RAB40B	WDR45B	WDR45B [nearest(intronic) / Strongly-Pan-related <PAN_ABC (alpha; PAN_Nasser) / PAN-SMR (Neg_Exp)> / Non_PAN_ABC (Adp; LIV; MuSc; Brain; SI); Non_PAN_SMR <Pos_Exp (Blood) / Neg_Exp (Adp-Sub; Co)>] / FN3K [Non_PAN_ABC (LIV; MuSc; Brain)] / FN3KRP [Non_PAN_ABC (LIV; MuSc; Brain; SI)] / LOC101929552 [NA] / RAB40B [Non_PAN_ABC (LIV; MuSc; Brain)]
EAS-meta-258	18:7026836 - 18:7126836	EAS/EUR	18:7076836:T:C	rs9948462	Primary	LAMA1	intronic	0.73	5	0	0.335	++	0.295	-0.044	0.007	9.32e-11	0.631	-0.035	0.007	1.5e-07	LAMA1	LAMA1	LAMA1 [nearest(intronic)]
EUR-meta-232	18:7026836 - 18:7126836	EAS/EUR	18:7070642:C:T	rs7240767	Primary	LAMA1	intronic	0.2	15	0	0.907	--	0.298	-0.038	0.007	1.16e-08	0.626	-0.037	0.007	1.71e-08	LAMA1	LAMA1	LAMA1 [nearest(intronic)]
EUR-meta-233	18:40037098 - 18:40137098	EUR	18:40087098:G:T	rs1431841	Primary	RIT2(-236.1kb)	intergenic	0.02	61	86.4	0.00661	++	0.114	0.01	0.009	0.292	0.211	0.043	0.008	3.08e-08	RIT2	RIT2	RIT2 [nearest(intergenic)]
EAS-meta-259	18:42318034 - 18:42418034	EAS	18:42368034:G:A	rs7235574	Primary	SETBP1	intronic	0.66	5	93.2	0.000124	-+	0.249	-0.046	0.007	8.93e-11	0.068	0.011	0.013	0.411	SETBP1	SETBP1	SETBP1 [nearest(intronic)]
EUR-meta-234	18:53000646 - 18:53100646	EUR	18:53050646:C:A	rs72926932	Primary	TCF4	intronic	0.49	5	NA	NA	?-	NA	NA	NA	NA	0.916	-0.076	0.011	2.04e-11	TCF4;C18orf54;MBD2;POLI;TXNL1	TCF4	TCF4 [nearest(intronic) / Non_PAN_ABC (MuSc; Brain)] / C18orf54 [Non_PAN_ABC (MuSc)] / MBD2 [Non_PAN_ABC (MuSc)] / POLI [Non_PAN_ABC (MuSc)] / TXNL1 [Non_PAN_ABC (MuSc)]
EUR-meta-235	18:56826430 - 18:56926430	EUR	18:56876430:G:T	rs9957320	Primary	GRP(-11kb)	intergenic	0.16	18	87.4	0.00482	--	0.172	-0.016	0.008	0.0492	0.172	-0.049	0.009	9.34e-09	GRP	GRP	GRP [nearest(intergenic)]
EAS-meta-260	18:57779135 - 18:57879135	EAS/EUR	18:57829135:T:C	rs6567160	Primary	MC4R(-209.4kb)	intergenic	0.68	3	82.8	0.016	--	0.208	0.08	0.007	5.69e-28	0.235	0.054	0.007	4.85e-13	MC4R	MC4R	MC4R [nearest(intergenic) / Non_PAN_SMR <Pos_Exp (Brain)>]
EUR-meta-236	18:57779135 - 18:57879135	EAS/EUR	18:57857135:T:G	rs8097210	Primary	MC4R(-181.4kb)	intergenic	0.08	32	79.4	0.0276	--	0.2	0.077	0.007	1.65e-24	0.267	0.054	0.007	1.06e-13	MC4R	MC4R	MC4R [nearest(intergenic)]
EUR-meta-237	18:57779135 - 18:57879135	EAS/EUR	18:58055731:G:A	rs7227255	Secondary	MC4R(+15.7kb)	intergenic	NA	NA	NA	NA	?-	NA	NA	NA	NA	0.024	-0.136	0.022	1.11e-09	MC4R	MC4R	MC4R [nearest(intergenic) / rs2229616 [VEP_Low: R2 (EAS:EUR=ND:0.91)] / Non_PAN_ABC (Adp)]
EAS-meta-261	18:60795884 - 18:60895884	EAS/EUR	18:60845884:T:C	rs12454712	Primary	BCL2	intronic	1	1	0	0.424	++	0.486	-0.055	0.006	1.33e-19	0.387	-0.048	0.007	2.4e-12	BCL2;HMSD	BCL2	BCL2 [nearest(intronic) / Non_PAN_ABC (MuSc; Brain)] / HMSD [Non_PAN_ABC (Brain)]
EUR-meta-238	18:60795884 - 18:60895884	EAS/EUR	18:60845884:T:C	rs12454712	Primary	BCL2	intronic	1	1	0	0.424	++	0.486	-0.055	0.006	1.33e-19	0.387	-0.048	0.007	2.4e-12	BCL2;HMSD	BCL2	BCL2 [nearest(intronic) / Non_PAN_ABC (MuSc; Brain)] / HMSD [Non_PAN_ABC (Brain)]
EUR-meta-239	19:4901064 - 19:5001064	EUR	19:4951064:C:G	rs262549	Primary	KDM4B(-18.1kb)	intergenic	0.24	10	0	0.788	--	0.015	0.04	0.027	0.148	0.193	0.047	0.008	6.48e-09	KDM4B	KDM4B	KDM4B [nearest(intergenic)]
EAS-meta-262	19:7243119 - 19:7343119	EAS	19:7293119:C:T	rs8101064	Primary	INSR	intronic	0.47	3	0	0.992	++	0.128	0.06	0.01	2.49e-09	0.037	0.06	0.018	0.000741	INSR	INSR	INSR [nearest(intronic) / Pan-related <PAN_ABC (alpha; PAN_Nasser)> / Non_PAN_ABC (Adp; LIV; MuSc; ADR; Brain; SI; Co)]
EAS-meta-263	19:7918168 - 19:8018168	EAS/EUR	19:7968168:G:A	rs2115107	Primary	MAP2K7	upstream	0.97	1	0	0.74	++	0.36	0.044	0.006	1.17e-11	0.39	0.047	0.007	1.68e-12	CTXN1;MAP2K7;PRR36;SNAPC2;TIMM44	SNAPC2	CTXN1 [Strongly-Pan-related <PAN_ABC (alpha; acinar; ductal; PAN_Nasser)> / Non_PAN_ABC (LIV; MuSc; ADR; Brain)] / MAP2K7 [nearest(upstream) / Pan-related <PAN_ABC (PAN_Nasser)> / Non_PAN_ABC (Adp; LIV; MuSc; ADR; Brain; SI)] / PRR36 [Very-Strongly-Pan-related <PAN_ABC (beta; alpha; ductal)>] / SNAPC2 [Very-Strongly-Pan-related <PAN_ABC (beta; alpha; acinar; ductal; PAN_Nasser)> / Non_PAN_ABC (Ad…
EUR-meta-240	19:7918168 - 19:8018168	EAS/EUR	19:7970635:G:A	rs4804833	Primary	MAP2K7	intronic	0.74	4	7.2	0.299	++	0.425	0.039	0.006	3.82e-10	0.391	0.048	0.007	3.42e-13	CTXN1;MAP2K7;PRR36;SNAPC2;TIMM44	SNAPC2	CTXN1 [Strongly-Pan-related <PAN_ABC (alpha; acinar; ductal; PAN_Nasser)> / Non_PAN_ABC (LIV; MuSc; ADR; Brain)] / MAP2K7 [nearest(intronic) / Pan-related <PAN_ABC (PAN_Nasser)> / Non_PAN_ABC (Adp; LIV; MuSc; ADR; Brain; SI)] / PRR36 [Very-Strongly-Pan-related <PAN_ABC (beta; alpha; ductal)>] / SNAPC2 [Very-Strongly-Pan-related <PAN_ABC (beta; alpha; acinar; ductal; PAN_Nasser)> / Non_PAN_ABC (Ad…
EUR-meta-241	19:12949458 - 19:13049458	EUR	19:13036677:A:G	rs10419627	Primary	FARSA	intronic	0.7	3	49.5	0.16	++	0.186	-0.029	0.008	0.000365	0.409	-0.043	0.006	3.15e-11	FARSA;DNASE2;GCDH;CALR;SYCE2	FARSA	FARSA [nearest(intronic) / Very-Strongly-Pan-related <PAN_ABC (beta; alpha; acinar; ductal; PAN_Nasser) / PAN-SMR (Neg_Exp)> / Non_PAN_ABC (Adp; LIV; MuSc; THY; ADR; Brain; SI; Co); Non_PAN_SMR <Pos_Exp (MuSc) / Neg_Exp (Adp-Sub; Blood)>] / DNASE2 [Very-Strongly-Pan-related <PAN_ABC (beta; alpha; acinar; ductal; PAN_Nasser)> / Non_PAN_ABC (Adp; LIV; MuSc; THY; ADR; Brain; Co); Non_PAN_SMR <Pos_Ex…
EUR-meta-242	19:19329549 - 19:19429549	EUR	19:19419071:G:A	rs739846	Primary	SUGP1	intronic	0.27	4	95.5	2.41e-06	++	0.098	0.014	0.01	0.164	0.076	0.088	0.012	2.02e-13	MAU2;SUGP1;TM6SF2;GATAD2A;HAPLN4	SUGP1	MAU2 [Pan-related <PAN_ABC (alpha; PAN_Nasser)> / Non_PAN_ABC (Adp; LIV; MuSc; Brain; Co); Non_PAN_SMR <Pos_Exp (Blood)>] / SUGP1 [nearest(intronic) / Pan-related <PAN_ABC (alpha; PAN_Nasser)> / Non_PAN_ABC (Adp; LIV; MuSc; Brain; Co)] / TM6SF2 [rs58542926 [VEP_Medium: R2 (EAS:EUR=0.63:0.92)] / Non_PAN_ABC (LIV; Brain)] / GATAD2A [Non_PAN_ABC (Adp; LIV; Co)] / HAPLN4 [Non_PAN_ABC (LIV; Brain)]
EAS-meta-264	19:22050706 - 19:22150706	EAS	19:22100706:A:G	rs142395395	Primary	ZNF208(-15.1kb)	intergenic	0.87	2	0	0.435	++	0.035	-0.205	0.018	8.6e-29	0	-2.305	2.693	0.392	ZNF208;ZNF257	ZNF208	ZNF208 [nearest(intergenic)] / ZNF257 [Non_PAN_SMR <Neg_Exp (Adp-Sub; SI; Co; Blood)>]
EAS-meta-265	19:33840838 - 19:33940838	EAS/EUR	19:33887405:T:C	rs7250869	Primary	PEPD	intronic	0.16	19	63.3	0.0989	++	0.461	-0.053	0.006	2.34e-18	0.687	-0.038	0.007	4.15e-08	PEPD;CEBPA;CEBPA-AS1;CEBPG;SLC7A10	PEPD	PEPD [nearest(intronic) / Non_PAN_ABC (LIV; MuSc)] / CEBPA [Non_PAN_ABC (LIV; MuSc; SI)] / CEBPA-AS1 [Non_PAN_ABC (LIV; MuSc; SI)] / CEBPG [Non_PAN_ABC (LIV; MuSc; SI)] / SLC7A10 [Non_PAN_ABC (LIV)]
EUR-meta-243	19:33840838 - 19:33940838	EAS/EUR	19:33897149:A:G	rs3786900	Primary	PEPD	intronic	0.34	10	0	0.389	++	0.362	-0.052	0.006	4.04e-16	0.269	-0.043	0.007	1.89e-09	PEPD;CEBPA;CEBPA-AS1;CEBPG;SLC7A10	PEPD	PEPD [nearest(intronic) / Non_PAN_ABC (LIV)] / CEBPA [Non_PAN_ABC (LIV; SI)] / CEBPA-AS1 [Non_PAN_ABC (LIV; SI)] / CEBPG [Non_PAN_ABC (LIV; SI)] / SLC7A10 [Non_PAN_ABC (LIV)]
EUR-meta-244	19:45361941 - 19:45461941	EUR	19:45411941:T:C	rs429358	Primary	APOE	exonic	1	1	90.9	0.000896	++	0.1	-0.029	0.01	0.00604	0.153	-0.075	0.009	2.62e-16	APOE;APOC1;APOC1P1;APOC2;TOMM40	APOE	APOE [nearest(exonic) / rs429358 [VEP_Low: R2 (EAS:EUR=1:1)] / Non_PAN_ABC (LIV; ADR; Brain)] / APOC1 [Non_PAN_ABC (LIV; Brain)] / APOC1P1 [Non_PAN_ABC (LIV)] / APOC2 [Non_PAN_ABC (LIV)] / TOMM40 [Non_PAN_ABC (LIV)]
EAS-meta-266	19:46113796 - 19:46213796	EAS/EUR	19:46157860:G:A	rs7507893	Primary	EML2(+9kb)	intergenic	0.57	12	NA	NA	-?	0.276	-0.085	0.007	3.28e-33	NA	NA	NA	NA	AC006132.1;DMWD;EML2;GIPR;MYPOP	AC006132.1	AC006132.1 [Pan-related <PAN-SMR (Neg_Exp)> / Non_PAN_SMR <Neg_Exp (Adp-Sub; Adp-Vis; THY; ADR; SI; Co)>] / DMWD [Pan-related <PAN-SMR (Neg_Exp)> / Non_PAN_SMR <Neg_Exp (Adp-Sub)>] / EML2 [nearest(intergenic)] / GIPR [Non_PAN_SMR <Neg_Exp (Brain; Blood)>] / MYPOP [Non_PAN_SMR <Neg_Exp (Blood)>]
EAS-meta-267	19:46113796 - 19:46213796	EAS/EUR	19:46175046:T:A	rs35560038	Secondary	GIPR	intronic	NA	NA	NA	NA	-?	0.422	-0.064	0.007	3.16e-20	NA	NA	NA	NA	GIPR;AC006132.1;DMWD;MYPOP	GIPR	GIPR [nearest(intronic) / Non_PAN_SMR <Neg_Exp (Brain; Blood)>] / AC006132.1 [Pan-related <PAN-SMR (Neg_Exp)> / Non_PAN_SMR <Neg_Exp (Adp-Sub; Adp-Vis; THY; ADR; SI; Co)>] / DMWD [Pan-related <PAN-SMR (Neg_Exp)> / Non_PAN_SMR <Neg_Exp (Adp-Sub)>] / MYPOP [Non_PAN_SMR <Neg_Exp (Blood)>]
EUR-meta-246	19:46113796 - 19:46213796	EAS/EUR	19:46178661:C:T	rs2238689	Secondary	GIPR	exonic	NA	NA	80.8	0.0226	--	0.302	-0.072	0.007	1.97e-22	0.579	-0.049	0.007	8.73e-14	GIPR;DMPK;SNRPD2	GIPR	GIPR [nearest(exonic) / Non_PAN_SMR <Pos_Exp (Co)>] / DMPK [Non_PAN_SMR <Neg_Exp (Blood)>] / SNRPD2 [Non_PAN_SMR <Pos_Exp (Adp-Sub; Blood)>]
EUR-meta-245	19:46113796 - 19:46213796	EAS/EUR	19:46157019:A:G	rs10406431	Primary	EML2(+8.1kb)	intergenic	0.25	4	74	0.0498	++	0.292	-0.079	0.007	2.19e-30	0.437	-0.06	0.006	1.56e-20	EML2;C19orf83;GIPR;DMPK;VASP	EML2	EML2 [nearest(intergenic) / Pan-related <PAN_ABC (alpha; PAN_Nasser)> / Non_PAN_ABC (LIV; ADR; Brain; Co)] / C19orf83 [Pan-related <PAN_ABC (PAN_Nasser)> / Non_PAN_ABC (LIV; ADR; Brain; Co)] / GIPR [Non_PAN_ABC (LIV); Non_PAN_SMR <Pos_Exp (Co)>] / DMPK [Non_PAN_SMR <Neg_Exp (Blood)>] / VASP [Non_PAN_ABC (Brain)]
EUR-meta-247	19:47519003 - 19:47619003	EUR	19:47569003:G:A	rs3810291	Primary	ZC3H4	3UTR	0.17	28	19.2	0.266	++	0.275	0.032	0.008	3.78e-05	0.672	0.043	0.007	3.38e-10	SAE1;TMEM160;ZC3H4;BBC3;NPAS1	ZC3H4	SAE1 [Very-Strongly-Pan-related <PAN_ABC (beta; alpha; acinar; ductal; PAN_Nasser)> / Non_PAN_ABC (Adp; LIV; MuSc; THY; ADR; Brain; SI; Co)] / TMEM160 [Very-Strongly-Pan-related <PAN_ABC (beta; alpha; acinar; ductal; PAN_Nasser)> / Non_PAN_ABC (Adp; LIV; MuSc; THY; ADR; Brain; SI; Co)] / ZC3H4 [nearest(3UTR) / Pan-related <PAN_ABC (ductal; PAN_Nasser)> / Non_PAN_ABC (Adp; LIV; MuSc; THY; ADR; Bra…
EUR-meta-248	20:21410433 - 20:21510433	EUR	20:21460433:T:A	rs17744783	Primary	NKX2-2(-31.2kb)	intergenic	0.29	12	94.8	1.11e-05	++	0.198	0.002	0.007	0.827	0.107	0.058	0.01	1.87e-08	NKX2-2	NKX2-2	NKX2-2 [nearest(intergenic)]
EUR-meta-249	20:32532871 - 20:32632871	EUR	20:32582871:C:T	rs1007090	Primary	RALY	intronic	0.12	101	84.9	0.00996	--	0.216	-0.018	0.007	0.0147	0.332	-0.044	0.007	1.01e-10	EIF2S2;CHMP4B;RALY;PXMP4;RP4-553F4.6	EIF2S2	EIF2S2 [Very-Strongly-Pan-related <PAN_ABC (beta; alpha; PAN_Nasser)> / Non_PAN_ABC (Adp; LIV; MuSc; ADR; Brain; SI; Co); Non_PAN_SMR <Neg_Exp (Blood)>] / CHMP4B [Pan-related <PAN_ABC (alpha; PAN_Nasser)> / Non_PAN_ABC (Adp; LIV; MuSc; ADR; Brain); Non_PAN_SMR <Neg_Exp (Brain; Blood)>] / RALY [nearest(intronic) / Pan-related <PAN_ABC (PAN_Nasser)> / Non_PAN_ABC (Adp; LIV; MuSc)] / PXMP4 [Pan-rela…
EAS-meta-270	20:42944812 - 20:43044812	EAS/EUR	20:42995130:A:G	rs6073416	Secondary	HNF4A	intronic	NA	NA	94	4.71e-05	++	0.303	-0.051	0.007	1.19e-13	0.479	-0.013	0.006	0.0451	HNF4A;OSER1-AS1;FITM2;OSER1	HNF4A	HNF4A [nearest(intronic)] / OSER1-AS1 [Pan-related <PAN-SMR (Neg_Exp)> / Non_PAN_SMR <Pos_Exp (Adp-Sub; Adp-Vis) / Neg_Exp (MuSc; THY; Blood); Both_Exp (Co)>] / FITM2 [Non_PAN_SMR <Neg_Exp (Blood)>] / OSER1 [Non_PAN_SMR <Neg_Exp (Blood)>]
EAS-meta-268	20:42944812 - 20:43044812	EAS/EUR	20:42852273:T:C	rs4812804	Primary	OSER1(+12.8kb)	intergenic	0.28	58	92.3	0.00032	++	0.469	-0.055	0.006	9.64e-20	0.792	-0.019	0.008	0.0158	OSER1;OSER1-AS1;FITM2	OSER1	OSER1 [nearest(intergenic) / Non_PAN_SMR <Neg_Exp (Blood)>] / OSER1-AS1 [Pan-related <PAN-SMR (Neg_Exp)> / Non_PAN_SMR <Pos_Exp (Adp-Sub; Adp-Vis) / Neg_Exp (MuSc; THY; Blood); Both_Exp (Co)>] / FITM2 [Non_PAN_SMR <Neg_Exp (Blood)>]
EAS-meta-271	20:42944812 - 20:43044812	EAS/EUR	20:43042364:C:T	rs1800961	Secondary	HNF4A	3UTR	NA	NA	0	0.442	++	0.012	0.135	0.027	5.7e-07	0.035	0.16	0.018	5.1e-20	HNF4A;OSER1-AS1;FITM2;OSER1	HNF4A	HNF4A [nearest(3UTR) / rs1800961 [VEP_Low: R2 (EAS:EUR=1:1)]] / OSER1-AS1 [Pan-related <PAN-SMR (Neg_Exp)> / Non_PAN_SMR <Pos_Exp (Adp-Sub; Adp-Vis) / Neg_Exp (MuSc; THY; Blood); Both_Exp (Co)>] / FITM2 [Non_PAN_SMR <Neg_Exp (Blood)>] / OSER1 [Non_PAN_SMR <Neg_Exp (Blood)>]
EAS-meta-269	20:42944812 - 20:43044812	EAS/EUR	20:42984363:G:C	rs188520200	Secondary	HNF4A	5UTR	NA	NA	0	0.813	+-	0.019	0.214	0.028	3.4e-14	0	-0.246	1.945	0.899	HNF4A;FITM2;OSER1-AS1;C20orf62;OSER1	HNF4A	HNF4A [nearest(5UTR) / Strongly-Pan-related <PAN_ABC (alpha; acinar; ductal; PAN_Nasser)> / Non_PAN_ABC (Adp; LIV; SI; Co)] / FITM2 [Strongly-Pan-related <PAN_ABC (alpha; acinar; ductal; PAN_Nasser)> / Non_PAN_ABC (SI; Co); Non_PAN_SMR <Neg_Exp (Blood)>] / OSER1-AS1 [Pan-related <PAN-SMR (Neg_Exp)> / Non_PAN_ABC (SI); Non_PAN_SMR <Pos_Exp (Adp-Sub; Adp-Vis) / Neg_Exp (MuSc; THY; Blood); Both_Exp …
EUR-meta-251	20:42944812 - 20:43044812	EAS/EUR	20:43003122:G:A	rs36112520	Secondary	HNF4A	intronic	NA	NA	84.7	0.0105	++	0.41	0.047	0.006	3.86e-14	0.111	0.078	0.01	4.23e-14	HNF4A	HNF4A	HNF4A [nearest(intronic)]
EUR-meta-250	20:42944812 - 20:43044812	EAS/EUR	20:43042364:C:T	rs1800961	Primary	HNF4A	3UTR	1	1	0	0.442	++	0.012	0.135	0.027	5.7e-07	0.035	0.16	0.018	5.1e-20	HNF4A	HNF4A	HNF4A [nearest(3UTR) / rs1800961 [VEP_Low: R2 (EAS:EUR=1:1)]]
EUR-meta-252	20:42944812 - 20:43044812	EAS/EUR	20:43256437:G:A	rs56062745	Secondary	ADA	intronic	NA	NA	NA	NA	?-	NA	NA	NA	NA	0.061	-0.062	0.015	2.31e-05	ADA	ADA	ADA [nearest(intronic)]
EUR-meta-253	20:45548564 - 20:45648564	EUR	20:45581777:G:C	rs1999536	Primary	EYA2	intronic	0.31	12	93.7	7.2e-05	--	0.229	-0.002	0.007	0.829	0.573	-0.04	0.006	4.86e-10	EYA2;SLC2A10	EYA2	EYA2 [nearest(intronic)] / SLC2A10 [Non_PAN_ABC (MuSc)]
EAS-meta-272	20:48782135 - 20:48882135	EAS/EUR	20:48830772:A:T	rs13040225	Primary	CEBPB(+21.6kb)	intergenic	0.11	10	0	0.582	++	0.496	-0.048	0.006	5.95e-15	0.464	-0.043	0.006	1.2e-11	CEBPB	CEBPB	CEBPB [nearest(intergenic)]
EUR-meta-254	20:48782135 - 20:48882135	EAS/EUR	20:48832135:C:T	rs11699802	Primary	CEBPB(+22.9kb)	intergenic	0.22	8	0	0.68	--	0.495	-0.048	0.006	8.18e-15	0.465	-0.044	0.006	8.84e-12	CEBPB;CEBPB-AS1	CEBPB	CEBPB [nearest(intergenic)] / CEBPB-AS1 [Non_PAN_SMR <Pos_Exp (Brain)>]
EAS-meta-273	20:50105386 - 20:50205386	EAS	20:50155386:C:T	rs6021276	Primary	NFATC2	intronic	0.72	2	82.3	0.0175	++	0.404	0.042	0.006	1.68e-11	0.36	0.02	0.007	0.00284	NFATC2	NFATC2	NFATC2 [nearest(intronic) / Pan-related <PAN_ABC (PAN_Nasser)> / Non_PAN_ABC (Adp; LIV; MuSc; THY; Brain; SI; Co)]
EAS-meta-274	20:57341933 - 20:57441933	EAS/EUR	20:57477177:TC:TCC	rs11477757	Primary	GNAS	intronic	0.26	13	NA	NA	+?	0.337	-0.055	0.01	9.93e-09	NA	NA	NA	NA	GNAS	GNAS	GNAS [nearest(intronic) / Non_PAN_ABC (Brain); Non_PAN_SMR <Pos_Exp (Blood)>]
EUR-meta-255	20:57341933 - 20:57441933	EAS/EUR	20:57397566:T:G	rs4812034	Primary	GNAS(-17.2kb)	intergenic	0.18	15	81.5	0.0199	++	0.378	-0.021	0.006	0.000982	0.454	-0.042	0.006	7.35e-11	GNAS	GNAS	GNAS [nearest(intergenic)]
EAS-meta-275	22:29345969 - 22:29445969	EAS	22:29380119:TA:T	rs147413364	Primary	ZNRF3	intronic	0.67	72	NA	NA	+?	0.357	0.04	0.007	3.7e-08	NA	NA	NA	NA	ZNRF3	ZNRF3	ZNRF3 [nearest(intronic)]
EUR-meta-256	22:30549562 - 22:30649562	EUR	22:30599562:G:A	rs2023681	Primary	HORMAD2(+26.5kb)	intergenic	0.11	122	NA	NA	?-	NA	NA	NA	NA	0.087	-0.083	0.012	7.4e-13	ASCC2;MTMR3;UQCR10;ZMAT5;HORMAD2	MTMR3	ASCC2 [rs11549795 [VEP_Low: R2 (EAS:EUR=ND:0.9)] / Pan-related <PAN_ABC (PAN_Nasser)> / Non_PAN_ABC (LIV; MuSc; ADR; Brain; Co)] / MTMR3 [rs41278853 [VEP_Medium: R2 (EAS:EUR=ND:0.95)] / Pan-related <PAN_ABC (PAN_Nasser)> / Non_PAN_ABC (LIV; MuSc; ADR; Brain; Co)] / UQCR10 [Strongly-Pan-related <PAN_ABC (acinar; ductal; PAN_Nasser)> / Non_PAN_ABC (LIV; MuSc; THY; ADR; Brain; Co)] / ZMAT5 [Strongly…
EUR-meta-257	22:41517722 - 22:41617722	EUR	22:41489920:G:A	rs5758223	Primary	EP300	intronic	0.17	106	NA	NA	?+	NA	NA	NA	NA	0.713	0.04	0.007	1.78e-08	EP300;L3MBTL2;RBX1;RP1-85F18.5;ST13	EP300	EP300 [nearest(intronic) / Non_PAN_ABC (LIV; Brain)] / L3MBTL2 [Non_PAN_ABC (LIV); Non_PAN_SMR <Neg_Exp (Brain; Blood)>] / RBX1 [Non_PAN_ABC (LIV)] / RP1-85F18.5 [Non_PAN_ABC (LIV)] / ST13 [Non_PAN_ABC (LIV)]
EUR-meta-258	22:44274727 - 22:44374727	EUR	22:44324727:C:G	rs738409	Primary	PNPLA3	3UTR	0.44	34	72.6	0.0561	--	0.417	0.025	0.006	3.16e-05	0.226	0.044	0.008	1.17e-08	PNPLA3	PNPLA3	PNPLA3 [nearest(3UTR) / rs738409 [VEP_Medium: R2 (EAS:EUR=1:1)] / Non_PAN_ABC (LIV)]
EAS-meta-276	22:46262111 - 22:46362111	EAS	22:46484465:A:G	rs7289813	Primary	C22orf26(+34.4kb)	intergenic	0.66	14	96.7	2.94e-08	+-	0.154	-0.06	0.01	1.54e-09	0.429	0.007	0.007	0.325	C22orf26;MIRLET7BHG;FLJ27365;LINC00899;RP6-109B7.3	MIRLET7BHG	C22orf26 [nearest(intergenic) / Pan-related <PAN_ABC (PAN_Nasser)> / Non_PAN_ABC (Adp; LIV; MuSc; ADR; Brain; Co)] / MIRLET7BHG [Strongly-Pan-related <PAN_ABC (acinar; ductal)>] / FLJ27365 [Pan-related <PAN_ABC (PAN_Nasser)> / Non_PAN_ABC (Adp; LIV; MuSc; THY; ADR; Brain; SI; Co)] / LINC00899 [Non_PAN_ABC (Adp; MuSc; ADR; Brain; Co); Non_PAN_SMR <Pos_Exp (Blood)>] / RP6-109B7.3 [Pan-related <PAN_…
EAS-meta-277	22:46262111 - 22:46362111	EAS	22:46425646:T:C	rs8136098	Secondary	C22orf26(-19.7kb)	intergenic	NA	NA	91.1	0.000797	--	0.141	0.042	0.009	3.45e-06	0.401	0.004	0.007	0.511	C22orf26;LINC00899;PRR34-AS1;RP6-109B7.3;FLJ27365	PRR34-AS1	C22orf26 [nearest(intergenic) / Pan-related <PAN_ABC (PAN_Nasser)> / Non_PAN_ABC (Adp; MuSc; SI; Co)] / LINC00899 [Pan-related <PAN_ABC (PAN_Nasser)> / Non_PAN_ABC (Adp; LIV; MuSc; THY; Brain; SI; Co); Non_PAN_SMR <Pos_Exp (Blood)>] / PRR34-AS1 [Very-Strongly-Pan-related <PAN_ABC (beta; acinar; ductal)>] / RP6-109B7.3 [Pan-related <PAN_ABC (PAN_Nasser)> / Non_PAN_ABC (Adp; LIV; MuSc; Brain; SI; C…
EAS-meta-278	22:50306302 - 22:50406302	EAS/EUR	22:50356302:C:T	rs28691713	Primary	PIM3	intronic	0.92	4	75.7	0.0426	--	0.435	-0.06	0.007	1.57e-18	0.483	-0.041	0.007	2.44e-09	PIM3;ALG12;CRELD2;IL17REL;TRABD	PIM3	PIM3 [nearest(intronic) / Very-Strongly-Pan-related <PAN_ABC (beta; alpha; acinar; ductal; PAN_Nasser)> / Non_PAN_ABC (Adp; LIV; MuSc; THY; ADR; Brain; SI; Co); Non_PAN_SMR <Neg_Exp (Blood)>] / ALG12 [Very-Strongly-Pan-related <PAN_ABC (beta; alpha; acinar; ductal; PAN_Nasser)> / Non_PAN_ABC (Adp; LIV; MuSc; THY; ADR; Brain; SI; Co)] / CRELD2 [Very-Strongly-Pan-related <PAN_ABC (beta; alpha; acin…
EUR-meta-259	22:50306302 - 22:50406302	EAS/EUR	22:50422348:G:A	rs36138276	Primary	IL17REL(-10.6kb)	intergenic	0.16	14	0	0.339	--	0.452	-0.052	0.007	5.24e-15	0.499	-0.043	0.007	6.4e-11	PIM3;ALG12;CRELD2;IL17REL;TRABD	PIM3	PIM3 [Very-Strongly-Pan-related <PAN_ABC (beta; alpha; acinar; ductal; PAN_Nasser)> / Non_PAN_ABC (Adp; LIV; MuSc; THY; ADR; Brain; SI; Co); Non_PAN_SMR <Neg_Exp (Blood)>] / ALG12 [Very-Strongly-Pan-related <PAN_ABC (beta; alpha; acinar; ductal; PAN_Nasser)> / Non_PAN_ABC (Adp; LIV; MuSc; THY; ADR; Brain; SI; Co)] / CRELD2 [Very-Strongly-Pan-related <PAN_ABC (beta; alpha; acinar; ductal; PAN_Nass…
BETA: Effect Size Estimate, CHR: Chromosome, EA: Effect Allele, EAF: Effect Allele Frequency, EUR-meta: European Meta-analysis, EAS-meta: East Asian Meta-analysis, NEA: Non-Effect Allele, P: P-value, PIP: Posterior Inclusion Probability, SE: Standard Error of the Effect Size Estimate

## Sheet: ST2
Supplementary Table 2. A List of T2D-associated loci and lead/secondary SNPs that were only present in the EAS-meta or the EUR-meta
Region	# of Signals	Nearest Gene		Associated Variant			AF (1kg base)		EAS/EUR-meta
				Type	CHR:BP:EAF:NEF	rsID	EAS	EUR	EAF	BETA	SE	P
EAS Specific T2D-Associated Variant
2:120181070 - 2:120281070	1	SCTR	exonic (missense)	Lead	2:120231070:C:G	rs3731600	0.012	<0.001	0.033	-0.122	0.02	1.695e-09
2:165478876 - 2:165578876	1	GRB14	exonic (missense)	Lead	2:165381518:A:G	rs75536691	0.02	<0.001	0.027	-0.176	0.019	1.061e-19
4:6245322 - 4:6345322	4	WFS1	exonic (missense)	Lead	4:6303731:G:A	rs147834269	0.013	<0.001	0.025	-0.212	0.028	3.307e-14
		WFS1	exonic (missense)	Conditional	4:6302757:T:C	rs144951440	0.007	<0.001	0.009	-0.205	0.037	3.684e-08
7:125378042 - 7:125478042	1	GRM8(-650.6kb)	intergenic	Lead	7:125428042:G:T	rs118159699	0.008	<0.001	0.015	0.166	0.03	4.171e-08
7:127203550 - 7:127303550	4	PAX4	exonic (missense)	Lead	7:127253550:C:T	rs2233580	0.098	<0.001	0.09	0.279	0.011	7.05e-150
		GCC1(-50.1kb)	intergenic	Conditional	7:127170600:G:A	rs189356053	0.001	<0.001	0.007	0.394	0.059	2.528e-11
		GCC1(-20kb)	intergenic	Conditional	7:127200646:T:C	rs139034871	0.014	<0.001	0.021	0.165	0.026	2.048e-10
		PAX4	exonic (missense)	Conditional	7:127253551:G:T	rs3824004	0.023	<0.001	0.033	0.201	0.016	1.89e-35
8:126424751 - 8:126524751	1	TRIB1(+24.1kb)	intergenic	Lead	8:126474751:C:T	rs78938736	0.404	0.004	0.352	0.041	0.007	4.709e-09
8:41459915 - 8:41559915	5	GOLGA7(-69.6kb)	intergenic	Conditional	8:41278325:C:T	rs183052157	0.001	<0.001	0.002	0.382	0.091	2.807e-05
		AGPAT6	3UTR	Conditional	8:41479356:G:A	rs141315854	0.01	<0.001	0.013	-0.246	0.032	7.526e-15
9:22084094 - 9:22184094	7	CDKN2B(+66.4kb)	intergenic	Conditional	9:22075777:C:T	rs77478272	0.009	<0.001	0.013	-0.082	0.029	0.004322
10:94410650 - 10:94510650	8	CPEB3	intronic	Conditional	10:94000863:G:A	rs538698072	0.001	<0.001	0.011	0.397	0.039	7.417e-24
		IDE(-40.2kb)	intergenic	Conditional	10:94171281:A:ACT	rs563973487	0.004	<0.001	0.003	0.097	0.097	0.3178
		IDE	intronic	Conditional	10:94309794:G:A	rs561837820	0.001	<0.001	0.007	0.664	0.083	1.294e-15
		HHEX	intronic	Conditional	10:94452672:C:G	rs191684511	0.004	<0.001	0.022	0.33	0.022	1.125e-48
11:2808546 - 11:2908546	17	KCNQ1	intronic	Conditional	11:2548798:G:A	rs532013558	0.003	<0.001	0.008	0.079	0.055	0.1479
		KCNQ1	intronic	Conditional	11:2650333:AT:A	rs149468188	0.079	0.008	0.078	-0.111	0.012	4.941e-20
		KCNQ1	intronic	Conditional	11:2684662:G:A	rs2073957	0.009	<0.001	0.033	-0.159	0.023	3.716e-12
		KCNQ1	intronic	Conditional	11:2848357:C:T	rs138205568	0.005	<0.001	0.025	-0.267	0.025	2.646e-26
		CDKN1C(-16kb)	intergenic	Conditional	11:2888475:G:C	rs180711363	0.006	<0.001	0.008	-0.124	0.037	0.0007886
		NAP1L4	intronic	Conditional	11:2970989:C:T	rs183753947	0.002	<0.001	0.018	-0.183	0.031	3.112e-09
12:111786771 - 12:111886771	1	SH2B3(-7kb)	intergenic	Lead	12:111836771:A:AC	rs149212747	0.158	<0.001	0.226	-0.054	0.008	3.264e-11
12:121313506 - 12:121413506	3	SPPL3(+21.3kb)	intergenic	Lead	12:121363506:A:G	rs118074491	0.02	<0.001	0.032	0.181	0.018	4.325e-23
12:71401567 - 12:71501567	2	PTPRR(+65kb)	intergenic	Conditional	12:71379626:T:C	rs185818594	0.004	<0.001	0.005	0.209	0.041	3.97e-07
12:121313506 - 12:121413506	3	SPPL3	intronic	Conditional	12:121238607:C:T	rs138213721	0.004	<0.001	0.004	-0.457	0.072	2.259e-10
EUR Specific T2D-Associated Variant
1:62529891 - 1:62629891	1	INADL	exonic (missense)	Lead	1:62579891:G:T	rs12140153	<0.001	0.067	0.095	-0.064	0.011	1.143e-08
1:214109256 - 1:214209256	2	PROX1(-5.7kb)	intergenic	Conditional	1:214150821:G:C	rs79687284	0.001	0.051	0.034	0.188	0.019	6.728e-24
2:594953 - 2:694953	2	FAM150B(+133.3kb)	intergenic	Lead	2:422144:C:T	rs62107261	<0.001	0.045	0.954	0.102	0.016	2.464e-10
2:165478876 - 2:165578876	2	COBLL1	intronic	Conditional	2:165573194:C:T	rs13024606	<0.001	0.047	0.046	0.052	0.016	0.0009407
3:54778827 - 3:54878827	1	CACNA2D3	intronic	Lead	3:54828827:G:T	rs76263492	0.001	0.031	0.045	0.09	0.016	8.924e-09
3:123015778 - 3:123115778	1	ADCY5	intronic	Lead	3:123065778:G:A	rs11708067	0.004	0.171	0.775	0.088	0.008	2.231e-30
3:150016540 - 3:150116540	1	TSC22D2(-59.6kb)	intergenic	Lead	3:150066540:T:A	rs62271373	<0.001	0.062	0.055	0.088	0.014	9.068e-10
3:152332636 - 3:152432636	2	P2RY1(-96kb)	intergenic	Lead	3:152456697:G:T	rs78569745	0.001	0.042	0.958	0.099	0.016	2.126e-09
3:168173132 - 3:168273132	1	GOLIM4(+409.4kb)	intergenic	Lead	3:168223132:G:A	rs7642311	0.01	0.133	0.872	0.054	0.01	1.37e-08
4:3191845 - 4:3291845	1	HTT	3UTR	Lead	4:3241845:C:T	rs362307	0.001	0.063	0.078	0.07	0.012	5.949e-09
5:14718092 - 5:14818092	4	ANKH	intronic	Lead	5:14755919:C:T	rs147581833	<0.001	0.005	0.006	-0.371	0.049	3.125e-14
5:102372968 - 5:102472968	2	GIN1	3UTR	Lead	5:102422968:C:T	rs115505614	<0.001	0.039	0.05	0.166	0.015	9.937e-29
5:14718092 - 5:14818092	4	TRIO	intronic	Conditional	5:14516903:C:T	rs115372267	<0.001	0.001	0.002	0.245	0.11	0.02552
5:14718092 - 5:14818092	4	ANKH	intronic	Conditional	5:14753745:G:A	rs17250977	<0.001	0.042	0.963	-0.118	0.018	3.641e-11
5:102372968 - 5:102472968	2	PAM	5UTR	Conditional	5:102338739:G:C	rs78408340	<0.001	0.004	0.992	-0.379	0.039	2.08e-22
8:9924824 - 8:10024824	1	MSRA	intronic	Lead	8:9996389:G:A	rs34990153	0.003	0.479	0.56	0.048	0.006	2.423e-13
8:128661742 - 8:128761742	1	MYC(-35.9kb)	intergenic	Lead	8:128711742:G:A	rs17772814	0.001	0.072	0.086	-0.075	0.013	2.402e-09
9:22084094 - 9:22184094	5	DMRTA1(+71.1kb)	intergenic	Conditional	9:22526809:C:A	rs117674623	<0.001	0.009	0.009	0.108	0.035	0.002113
10:114708349 - 10:114808349	12	ACSL5(-28.8kb)	intergenic	Conditional	10:114104950:G:C	rs117517685	<0.001	0.032	0.036	-0.027	0.018	0.1236
		ACSL5(-22.3kb)	intergenic	Conditional	10:114111493:C:T	rs139929056	<0.001	0.007	0.014	-0.085	0.031	0.005364
		VTI1A(+25.4kb)	intergenic	Conditional	10:114603922:G:A	rs185210962	<0.001	0.012	0.988	0.243	0.034	1.585e-12
		TCF7L2(+175.8kb)	intergenic	Conditional	10:115103193:G:A	rs12255625	<0.001	0.041	0.927	-0.004	0.013	0.733
		HABP2(-174.1kb)	intergenic	Conditional	10:115136540:G:A	rs72830009	<0.001	0.02	0.971	-0.018	0.02	0.3773
		PLEKHS1(+12.1kb)	intergenic	Conditional	10:115555274:C:T	rs149465629	<0.001	0.004	0.008	0.09	0.038	0.01922
11:14713828 - 11:14813828	1	PDE3B	intronic	Lead	11:14763828:C:A	rs141521721	<0.001	0.026	0.023	0.121	0.021	1.483e-08
11:32877778 - 11:32977778	1	QSER1	intronic	Lead	11:32927778:G:T	rs145678014	<0.001	0.031	0.043	-0.105	0.016	1.281e-10
12:4334844 - 12:4434844	6	CCND2	intronic	Lead	12:4384844:G:T	rs76895963	<0.001	0.024	0.98	0.483	0.028	6.044e-69
12:121313506 - 12:121413506	3	HNF1A	3UTR	Lead	12:121432117:G:C	rs56348580	0.005	0.303	0.308	-0.062	0.007	3.821e-19
12:4334844 - 12:4434844	6	CCND2	intronic	Conditional	12:4384696:C:T	rs3217792	<0.001	0.097	0.087	-0.117	0.012	4.409e-22
		FGF6(-15.8kb)	intergenic	Conditional	12:4521511:T:A	rs78470967	<0.001	0.029	0.038	-0.082	0.018	3.206e-06
12:121313506 - 12:121413506	3	HNF1A(-35.8kb)	intergenic	Conditional	12:121380541:G:A	rs73226260	0.003	0.044	0.033	-0.121	0.019	1.225e-10
		HNF1A	exonic (missense)	Conditional	12:121416864:C:T	rs1800574	0.001	0.028	0.029	0.151	0.019	3.135e-15
14:79894099 - 14:79994099	1	NRXN3	intronic	Lead	14:79944099:G:A	rs8008910	0.001	0.21	0.219	0.055	0.008	3.112e-13
15:38778140 - 15:38878140	2	RASGRP1(+15.3kb)	intergenic	Lead	15:38873115:C:T	rs34715063	0.001	0.128	0.878	-0.077	0.01	6.291e-15
15:57302893 - 15:57402893	1	TCF12	intronic	Lead	15:57469927:C:A	rs144801310	0.007	0.033	0.966	-0.101	0.018	3.857e-08
17:9743756 - 17:9843756	1	GLP2R	3UTR	Lead	17:9793756:G:A	rs55973554	0.002	0.275	0.322	0.039	0.007	9.734e-09
17:62152689 - 17:62252689	1	ERN1	intronic	Lead	17:62202689:C:T	rs58642235	<0.001	0.148	0.861	-0.057	0.009	1.73e-09
18:53000646 - 18:53100646	1	TCF4	intronic	Lead	18:53050646:C:A	rs72926932	0.002	0.068	0.916	-0.076	0.011	1.939e-11
18:57779135 - 18:57879135	2	MC4R(+15.7kb)	intergenic	Conditional	18:58055731:G:A	rs7227255	<0.001	0.008	0.024	-0.136	0.022	1.103e-09
20:42944812 - 20:43044812	3	ADA	intronic	Conditional	20:43256437:G:A	rs56062745	<0.001	0.084	0.061	-0.062	0.015	2.452e-05
22:30549562 - 22:30649562	1	HORMAD2(+26.5kb)	intergenic	Lead	22:30599562:G:A	rs2023681	0.999	0.937	0.087	-0.083	0.012	6.839e-13
22:41517722 - 22:41617722	1	EP300	intronic	Lead	22:41489920:G:A	rs5758223	0.998	0.734	0.713	0.04	0.007	1.624e-08
This table shows distinct T2D-associated genetic variants derived from EAS and EUR meta-analyses. Variants are considered population-specific if they are not detected and are present at very low frequencies (<1%) in the other population's meta-analysis, as per the 1kg database. BP: Base Position, BETA: Effect Size Estimate, CHR: Chromosome, EA: Effect Allele, EAF: Effect Allele Frequency, EUR-met…

## Sheet: ST3
Supplementary Table 3. Summary of cross-ancestry meta-analysis
The Cross-meta identified 544 significant loci with 415 primary and 129 secondary variants. ABF: Allele-Based Frequency, BP: Base Position, BETA: Effect Size Estimate, CHR: Chromosome, Cross-meta: Cross-ancestry meta analysis, EA: Effect Allele, EAF: Effect Allele Frequency, EUR-meta: European Meta-analysis, EAS-meta: East Asian Meta-analysis, HetPVal: Heterogeneity P-Value, I2: I-squared (measur…
Region_subID	Region Ranges	Significance	Lead Variant (CHR:BP:EA:NEA)	Lead Variant (rsID)	Varinat Type	Nearest Gene	Nearest Gene Function	ABF		Heterogeneity		Direction (EAS-meta - EUR-meta)	Cross-meta				EAS-meta				EUR-meta				Putative Genes	Prioritized Gene	Supporting Evidence
								PIP	ABF_95	I2	HetPVal		EAF	BETA	SE	P	EAF	BETA	SE	P	EAF	BETA	SE	P
TA-meta-1	1:20638550 - 1:20738550	Cross/EAS	1:20688550:T:C	rs12566008	Primary	VWA5B1(+7.2kb)	intergenic	0.19	11	37.7	0.205	++	0.299	-0.036	0.005	5.45e-13	0.365	-0.041	0.006	7.23e-11	0.188	-0.028	0.008	0.000664	CAMK2N1;VWA5B1	CAMK2N1	CAMK2N1 [Strongly-Pan-related <PAN_ABC (acinar)>] / VWA5B1 [nearest(intergenic)]
TA-meta-2	1:26344997 - 1:26444997	Cross	1:26394997:A:C	rs3008226	Primary	TRIM63	upstream	0.05	35	2.3	0.312	++	0.15	-0.036	0.006	6.02e-09	0.124	-0.029	0.009	0.00126	0.173	-0.042	0.009	7.33e-07	PDIK1L;PAFAH2;SLC30A2;TRIM63;ZNF593	PDIK1L	PDIK1L [Very-Strongly-Pan-related <PAN_ABC (beta; PAN_Nasser)> / Non_PAN_ABC (Adp; LIV; MuSc; THY; ADR; Brain; SI; Co); Non_PAN_SMR <Neg_Exp (Brain)>] / PAFAH2 [Very-Strongly-Pan-related <PAN_ABC (beta; alpha; PAN_Nasser)> / Non_PAN_ABC (LIV)] / SLC30A2 [Strongly-Pan-related <PAN_ABC (acinar; ductal; PAN_Nasser)> / Non_PAN_ABC (LIV; MuSc; THY; SI; Co)] / TRIM63 [nearest(upstream) / Non_PAN_ABC (L…
TA-meta-3	1:28970114 - 1:29070114	Cross	1:29020114:C:G	rs12040613	Primary	GMEB1	intronic	0.11	76	33.9	0.219	--	0.418	0.027	0.005	4.22e-08	0.234	0.02	0.007	0.00471	0.578	0.032	0.007	1.23e-06	GMEB1;TAF12;YTHDF2;RAB42;SNHG12	GMEB1	GMEB1 [nearest(intronic) / Strongly-Pan-related <PAN_ABC (acinar; ductal; PAN_Nasser)> / Non_PAN_ABC (Adp; LIV; MuSc; THY; ADR; Brain; SI; Co)] / TAF12 [Strongly-Pan-related <PAN_ABC (alpha; acinar; ductal; PAN_Nasser)> / Non_PAN_ABC (Adp; LIV; MuSc; THY; ADR; Brain; SI; Co)] / YTHDF2 [Very-Strongly-Pan-related <PAN_ABC (beta; alpha; acinar; ductal; PAN_Nasser)> / Non_PAN_ABC (Adp; LIV; MuSc; THY…
TA-meta-4	1:33158623 - 1:33258623	Cross	1:33208623:C:T	rs58946763	Primary	KIAA1522	intronic	0.09	122	0	0.437	++	0.146	0.041	0.007	2.35e-08	0.17	0.038	0.008	1.86e-06	0.038	0.053	0.018	0.00226	KIAA1522;RBBP4;SYNC;YARS;ZBTB8OS	KIAA1522	KIAA1522 [nearest(intronic) / Pan-related <PAN_ABC (PAN_Nasser)> / Non_PAN_ABC (Adp; LIV; ADR; Brain); Non_PAN_SMR <Pos_Exp (Blood)>] / RBBP4 [Pan-related <PAN_ABC (PAN_Nasser)> / Non_PAN_ABC (LIV)] / SYNC [Pan-related <PAN_ABC (PAN_Nasser)> / Non_PAN_ABC (LIV; ADR; Brain; SI; Co)] / YARS [Pan-related <PAN_ABC (PAN_Nasser)> / Non_PAN_ABC (LIV; Co)] / ZBTB8OS [Pan-related <PAN_ABC (PAN_Nasser)> / …
TA-meta-5	1:39798347 - 1:39898347	Cross/EAS/EUR	1:39848347:C:G	rs6668369	Primary	MACF1	intronic	0.25	29	69.7	0.0691	--	0.195	0.07	0.006	3.23e-34	0.165	0.058	0.009	3.43e-11	0.219	0.079	0.008	5.56e-25	MACF1;PABPC4;PPIEL;BMP8A;KIAA0754	MACF1	MACF1 [nearest(intronic) / rs2296172 [VEP_High: R2 (EAS:EUR=1:0.98)] / Very-Strongly-Pan-related <PAN_ABC (beta; alpha; acinar; ductal; PAN_Nasser)> / Non_PAN_ABC (Brain); Non_PAN_SMR <Pos_Exp (Brain) / Neg_Exp (Blood)>] / PABPC4 [Very-Strongly-Pan-related <PAN_ABC (beta; alpha; ductal)> / Non_PAN_ABC (LIV; MuSc; Brain; Co); Non_PAN_SMR <Pos_Exp (Adp-Sub; Adp-Vis; MuSc; THY; Co; Blood)>] / PPIEL …
TA-meta-6	1:46202144 - 1:46302144	Cross/EAS	1:46252144:C:T	rs7540578	Primary	MAST2(-515b)	intergenic	0.1	235	11.8	0.287	--	0.322	-0.036	0.005	4.08e-14	0.349	-0.04	0.006	3.94e-10	0.289	-0.03	0.007	1.67e-05	GPBP1L1;IPP;PIK3R3;TMEM69;MAST2	IPP	GPBP1L1 [rs1135812 [VEP_Medium: R2 (EAS:EUR=0.72:0.89)] / Very-Strongly-Pan-related <PAN_ABC (beta; alpha; acinar; ductal; PAN_Nasser)> / Non_PAN_ABC (Adp; LIV; MuSc; THY; ADR; Brain; SI; Co)] / IPP [rs28375469 [VEP_Low: R2 (EAS:EUR=0.76:0.9)] / Very-Strongly-Pan-related <PAN_ABC (beta; ductal; PAN_Nasser)> / Non_PAN_ABC (Adp; LIV; MuSc; THY; ADR; Brain; SI; Co); Non_PAN_SMR <Neg_Exp (MuSc; Blood…
TA-meta-7	1:51141935 - 1:51241935	Cross/EAS/EUR	1:51191935:T:A	rs11205766	Primary	FAF1	intronic	0.64	16	54.7	0.138	--	0.094	-0.079	0.008	1.08e-25	0.098	-0.09	0.01	3.98e-18	0.091	-0.067	0.011	1.99e-09	CDKN2C;FAF1;RNF11;TTC39A;NRD1	FAF1	CDKN2C [Very-Strongly-Pan-related <PAN_ABC (beta; ductal; PAN_Nasser)> / Non_PAN_ABC (Adp; LIV; MuSc; THY; ADR; Brain; SI; Co); Non_PAN_SMR <Neg_Exp (MuSc; Brain)>] / FAF1 [nearest(intronic) / Very-Strongly-Pan-related <PAN_ABC (beta; alpha; acinar; ductal; PAN_Nasser)> / Non_PAN_ABC (Adp; LIV; MuSc; THY; ADR; Brain; SI; Co)] / RNF11 [Very-Strongly-Pan-related <PAN_ABC (beta; alpha; acinar; PAN_N…
TA-meta-8	1:62529891 - 1:62629891	Cross/EUR	1:62579891:G:T	rs12140153	Primary	INADL	exonic	1	1	NA	NA	?-	0.095	-0.064	0.011	1.14e-08	NA	NA	NA	NA	0.095	-0.064	0.011	1.17e-08	INADL;KANK4;ALG6;EFCAB7;FOXD3	INADL	INADL [nearest(exonic) / rs12140153 [VEP_Medium: R2 (EAS:EUR=1:1)] / Non_PAN_ABC (Brain)] / KANK4 [Pan-related <PAN_ABC (PAN_Nasser)> / Non_PAN_ABC (MuSc; Brain)] / ALG6 [Non_PAN_ABC (Brain)] / EFCAB7 [Non_PAN_ABC (Brain)] / FOXD3 [Non_PAN_ABC (Brain)]
TA-meta-9	1:64057284 - 1:64157284	Cross/EAS	1:64107284:C:T	rs2269247	Primary	PGM1	intronic	0.2	5	0	0.572	--	0.19	-0.043	0.006	2.14e-14	0.193	-0.046	0.008	2.03e-09	0.187	-0.04	0.008	1.59e-06	PGM1;AK4;JAK1;RAVER2;RP11-182I10.3	PGM1	PGM1 [nearest(intronic) / rs11208257 [VEP_Medium: R2 (EAS:EUR=0.97:0.9)] / Non_PAN_ABC (LIV; Co)] / AK4 [Non_PAN_ABC (LIV)] / JAK1 [Non_PAN_ABC (LIV)] / RAVER2 [Non_PAN_ABC (LIV)] / RP11-182I10.3 [Non_PAN_ABC (LIV)]
TA-meta-10	1:65939878 - 1:66039878	Cross	1:65989878:C:A	rs10889560	Primary	LEPR	intronic	0.79	18	0	0.622	++	0.084	0.048	0.008	5.62e-09	0.079	0.044	0.012	0.000328	0.088	0.052	0.011	4.08e-06	LEPR	LEPR	LEPR [nearest(intronic)]
TA-meta-11	1:84396980 - 1:84496980	Cross	1:84446980:A:C	rs522892	Primary	TTLL7	intronic	0.07	50	0	0.711	++	0.209	-0.034	0.006	1.56e-08	0.08	-0.038	0.011	0.000861	0.261	-0.033	0.007	4.93e-06	TTLL7;LOC101927560;PRKACB;RPF1;WDR63	TTLL7	TTLL7 [nearest(intronic) / rs603447 [VEP_Medium: R2 (EAS:EUR=0.87:0.99)] / Very-Strongly-Pan-related <PAN_ABC (beta; ductal; PAN_Nasser)> / Non_PAN_ABC (Adp; LIV; MuSc; THY; ADR; Brain; SI; Co)] / LOC101927560 [Very-Strongly-Pan-related <PAN_ABC (beta; ductal)>] / PRKACB [Very-Strongly-Pan-related <PAN_ABC (beta)> / Non_PAN_ABC (Brain)] / RPF1 [Very-Strongly-Pan-related <PAN_ABC (beta; alpha; aci…
TA-meta-12	1:112243512 - 1:112343512	Cross	1:112293512:A:G	rs6687953	Primary	FAM212B	intronic	0.22	6	31	0.229	--	0.378	0.028	0.004	4.69e-10	0.36	0.023	0.006	0.000267	0.397	0.034	0.006	1.92e-07	FAM212B;DDX20;FAM212B-AS1;LOC101928718;RAP1A	FAM212B	FAM212B [nearest(intronic) / Very-Strongly-Pan-related <PAN_ABC (beta; alpha; acinar; PAN_Nasser)> / Non_PAN_ABC (Adp; LIV; MuSc; ADR; Brain; SI; Co)] / DDX20 [rs197412 [VEP_Low: R2 (EAS:EUR=0.99:0.98)] / Pan-related <PAN_ABC (PAN_Nasser)> / Non_PAN_ABC (Adp; LIV; MuSc; ADR; Brain; SI; Co)] / FAM212B-AS1 [Very-Strongly-Pan-related <PAN_ABC (beta; alpha; acinar; PAN_Nasser)> / Non_PAN_ABC (Adp; LI…
TA-meta-13	1:117482790 - 1:117582790	Cross/EUR	1:117532790:C:T	rs1127215	Primary	PTGFRN	3UTR	0.86	4	84.8	0.0103	--	0.345	-0.038	0.005	2.25e-15	0.263	-0.025	0.007	0.000405	0.415	-0.049	0.006	3.92e-14	PTGFRN;C1orf137;CD2;IGSF3;TTF2	PTGFRN	PTGFRN [nearest(3UTR) / rs10801922 [VEP_Low: R2 (EAS:EUR=ND:0.86)] / Non_PAN_ABC (MuSc)] / C1orf137 [Non_PAN_ABC (MuSc)] / CD2 [Non_PAN_ABC (MuSc)] / IGSF3 [Non_PAN_ABC (MuSc)] / TTF2 [Non_PAN_ABC (MuSc)]
TA-meta-14	1:118093948 - 1:118193948	Cross/EUR	1:118143948:G:A	rs320368	Primary	FAM46C(-4.6kb)	intergenic	0.34	7	42.7	0.186	++	0.256	0.032	0.005	4.23e-09	0.143	0.022	0.009	0.0117	0.321	0.037	0.007	4.6e-08	FAM46C;GDAP2;LOC100996263;LOC105378933;MAN1A2	FAM46C	FAM46C [nearest(intergenic) / Very-Strongly-Pan-related <PAN_ABC (beta; alpha; acinar; ductal; PAN_Nasser)> / Non_PAN_ABC (Adp; LIV; MuSc; THY; ADR; Brain; SI; Co)] / GDAP2 [Very-Strongly-Pan-related <PAN_ABC (beta; alpha; acinar; ductal; PAN_Nasser)> / Non_PAN_ABC (LIV; MuSc; THY; ADR; Brain; SI; Co)] / LOC100996263 [Very-Strongly-Pan-related <PAN_ABC (beta; alpha; acinar; ductal)>] / LOC1053789…
TA-meta-15	1:120476982 - 1:120576982	Cross/EUR	1:120526982:C:T	rs1493694	Primary	NOTCH2	intronic	0.27	28	32.1	0.225	++	0.091	0.074	0.009	1.88e-16	0.025	0.054	0.019	0.00557	0.11	0.08	0.01	3.35e-15	NOTCH2;ADAM30	NOTCH2	NOTCH2 [nearest(intronic) / Pan-related <PAN-SMR (Pos_Exp)>] / ADAM30 [rs2641348 [VEP_Low: R2 (EAS:EUR=1:0.93)]]
TA-meta-16	1:146670160 - 1:146770160	Cross	1:146720160:A:G	rs7511989	Primary	CHD1L	intronic	0.05	22	0	0.918	--	0.167	0.038	0.006	1.3e-09	0.203	0.039	0.008	4.37e-07	0.09	0.037	0.011	0.000899	CHD1L;ACP6;BCL9;PDIA3P1;FMO5	CHD1L	CHD1L [nearest(intronic) / rs2275249 [VEP_Medium: R2 (EAS:EUR=0.87:0.98)] / Very-Strongly-Pan-related <PAN_ABC (beta; PAN_Nasser)> / Non_PAN_ABC (Adp; LIV; MuSc; THY; ADR; Brain; SI; Co)] / ACP6 [Very-Strongly-Pan-related <PAN_ABC (beta; alpha; acinar; ductal)> / Non_PAN_ABC (Adp; LIV; MuSc; ADR; Brain; Co)] / BCL9 [Strongly-Pan-related <PAN_ABC (acinar; ductal)> / Non_PAN_ABC (Adp; LIV; MuSc; Co…
TA-meta-17	1:150950183 - 1:151050183	Cross	1:151000183:G:A	rs35550545	Primary	PRUNE	intronic	0.18	58	0	0.884	++	0.101	0.048	0.008	8.69e-10	0.086	0.047	0.012	0.000103	0.112	0.049	0.01	1.88e-06	BNIPL;PRUNE;MLLT11	PRUNE	BNIPL [Non_PAN_ABC (THY); Non_PAN_SMR <Neg_Exp (THY)>] / PRUNE [nearest(intronic)] / MLLT11 [Non_PAN_SMR <Pos_Exp (Blood)>]
TA-meta-18	1:177831424 - 1:177931424	Cross/EAS/EUR	1:177881424:G:A	rs1266155	Primary	SEC16B(-11.7kb)	intergenic	0.1	10	0	0.854	++	0.203	0.053	0.005	6.94e-23	0.205	0.052	0.007	1.09e-12	0.2	0.054	0.008	9.67e-12	SEC16B	SEC16B	SEC16B [nearest(intergenic)]
TA-meta-19	1:179197494 - 1:179297494	Cross	1:179247494:A:G	rs2816176	Primary	SOAT1(-15.4kb)	intergenic	0.13	61	0	0.709	--	0.43	0.024	0.004	4.14e-08	0.446	0.026	0.006	1.92e-05	0.412	0.022	0.006	0.000559	SOAT1;ABL2;AXDND1;TOR3A;FAM20B	SOAT1	SOAT1 [nearest(intergenic) / Strongly-Pan-related <PAN_ABC (alpha; acinar; ductal; PAN_Nasser)> / Non_PAN_ABC (Adp; LIV; MuSc; THY; Brain)] / ABL2 [Pan-related <PAN_ABC (PAN_Nasser)> / Non_PAN_ABC (Adp; LIV; MuSc; THY; ADR; Brain; SI; Co)] / AXDND1 [Pan-related <PAN_ABC (PAN_Nasser)> / Non_PAN_ABC (MuSc; Brain)] / TOR3A [Pan-related <PAN_ABC (PAN_Nasser)> / Non_PAN_ABC (Adp; MuSc; Brain)] / FAM20…
TA-meta-20	1:183967131 - 1:184067131	Cross/EAS	1:184017131:A:G	rs10797937	Primary	TSEN15(-3.7kb)	intergenic	0.21	7	70.4	0.0662	--	0.414	0.029	0.004	4.69e-11	0.462	0.036	0.006	9.47e-10	0.352	0.02	0.007	0.00298	TSEN15;COLGALT2;HMCN1;SWT1;TRMT1L	TSEN15	TSEN15 [nearest(intergenic) / rs1046934 [VEP_Medium: R2 (EAS:EUR=1:1)] / Very-Strongly-Pan-related <PAN_ABC (beta; alpha; acinar; ductal; PAN_Nasser)> / Non_PAN_ABC (Adp; LIV; MuSc; THY; ADR; Brain; SI; Co); Non_PAN_SMR <Pos_Exp (Brain)>] / COLGALT2 [Very-Strongly-Pan-related <PAN_ABC (beta; PAN_Nasser)> / Non_PAN_ABC (Adp; LIV; MuSc; THY; ADR; Brain; Co)] / HMCN1 [Pan-related <PAN_ABC (PAN_Nasse…
TA-meta-21	1:204489291 - 1:204589291	Cross/EAS	1:204539291:A:G	rs6689629	Primary	MDM4	intronic	0.07	28	0	0.459	++	0.318	-0.028	0.005	1.48e-08	0.393	-0.025	0.006	6.41e-05	0.195	-0.033	0.008	4.49e-05	MDM4;LRRN2;PIK3C2B;PLEKHA6;PPP1R15B	MDM4	MDM4 [nearest(intronic) / Very-Strongly-Pan-related <PAN_ABC (beta; alpha; ductal; PAN_Nasser)> / Non_PAN_ABC (Adp; LIV; MuSc; THY; ADR; Brain; SI; Co)] / LRRN2 [Pan-related <PAN_ABC (PAN_Nasser)> / Non_PAN_ABC (MuSc; Brain)] / PIK3C2B [Pan-related <PAN_ABC (PAN_Nasser)>] / PLEKHA6 [Pan-related <PAN_ABC (PAN_Nasser)> / Non_PAN_ABC (Adp; ADR; Brain)] / PPP1R15B [Pan-related <PAN_ABC (alpha; PAN_Na…
TA-meta-22	1:204994339 - 1:205094339	Cross/EUR	1:205044339:G:A	rs11240351	Primary	CNTN2	3UTR	0.27	18	37.2	0.207	--	0.425	-0.029	0.005	2.1e-08	0.14	-0.02	0.009	0.0183	0.587	-0.034	0.006	1.63e-07	CNTN2	CNTN2	CNTN2 [nearest(3UTR)]
TA-meta-23	1:206550992 - 1:206650992	Cross/EUR	1:206600992:A:G	rs9429893	Primary	SRGAP2	intronic	0.14	23	32.5	0.224	++	0.383	-0.03	0.005	1.14e-09	0.214	-0.023	0.007	0.00241	0.506	-0.035	0.006	5.54e-08	SRGAP2;AVPR1B;IKBKE	SRGAP2	SRGAP2 [nearest(intronic)] / AVPR1B [Non_PAN_ABC (MuSc)] / IKBKE [Non_PAN_ABC (MuSc)]
TA-meta-24	1:210215384 - 1:210315384	Cross	1:210265384:C:G	rs227199	Primary	SYT14	intronic	0.22	22	0	0.65	--	0.287	0.029	0.005	1.18e-08	0.211	0.026	0.007	0.000498	0.349	0.031	0.007	6.02e-06	SYT14;SERTAD4-AS1	SYT14	SYT14 [nearest(intronic) / Non_PAN_ABC (Brain)] / SERTAD4-AS1 [Non_PAN_SMR <Neg_Exp (THY; Brain)>]
TA-meta-25	1:214109256 - 1:214209256	Cross/EAS/EUR	1:214159256:T:C	rs340874	Primary	PROX1	intronic	1	1	88.2	0.00367	--	0.463	0.054	0.004	1.59e-33	0.384	0.042	0.006	1.35e-11	0.551	0.068	0.006	1.55e-25	PROX1;PROX1-AS1;SMYD2	PROX1	PROX1 [nearest(intronic) / Very-Strongly-Pan-related <PAN_ABC (beta; PAN_Nasser)> / Non_PAN_ABC (Adp; LIV; ADR; Brain; SI; Co)] / PROX1-AS1 [Strongly-Pan-related <PAN_ABC (PAN_Nasser) / PAN-SMR (Neg_Exp)> / Non_PAN_ABC (Adp; LIV; ADR; Brain; SI; Co); Non_PAN_SMR <Neg_Exp (Brain)>] / SMYD2 [Very-Strongly-Pan-related <PAN_ABC (beta)>]
TA-meta-26	1:214109256 - 1:214209256	Cross/EAS/EUR	1:214284540:G:C	rs79184831	Secondary	PROX1(+69.9kb)	intergenic	NA	NA	53.7	0.141	++	0.024	0.082	0.016	2e-07	0.021	0.107	0.023	4.36e-06	0.026	0.06	0.021	0.00449	PROX1-AS1;PROX1	PROX1-AS1	PROX1-AS1 [Pan-related <PAN-SMR (Neg_Exp)> / Non_PAN_ABC (ADR); Non_PAN_SMR <Neg_Exp (Brain)>] / PROX1 [nearest(intergenic)]
TA-meta-27	1:219627532 - 1:219727532	Cross/EUR	1:219677532:C:T	rs4323719	Primary	SLC30A10(-181.2kb)	intergenic	0.2	8	75.3	0.0442	++	0.436	0.04	0.005	1.36e-18	0.292	0.031	0.007	2.48e-06	0.572	0.049	0.006	1.04e-14	SLC30A10	SLC30A10	SLC30A10 [nearest(intergenic)]
TA-meta-28	1:229622955 - 1:229722955	Cross/EAS/EUR	1:229672955:G:A	rs348330	Primary	ABCB10	intronic	1	1	0	0.992	--	0.486	-0.049	0.005	3.15e-24	0.318	-0.049	0.007	2.35e-12	0.64	-0.049	0.007	2.1e-13	ABCB10;RP5-1068B5.3	ABCB10	ABCB10 [nearest(intronic)] / RP5-1068B5.3 [Non_PAN_SMR <Pos_Exp (Blood)>]
TA-meta-29	1:235640800 - 1:235740800	Cross	1:235690800:G:A	rs291367	Primary	GNG4(-20.2kb)	intergenic	0.15	66	74.8	0.0463	--	0.366	-0.028	0.005	4.48e-09	0.367	-0.019	0.006	0.00296	0.366	-0.038	0.007	6.06e-08	B3GALNT2;GNG4;TBCE	GNG4	B3GALNT2 [Non_PAN_SMR <Neg_Exp (Brain; Blood)>] / GNG4 [nearest(intergenic)] / TBCE [Non_PAN_SMR <Neg_Exp (Blood)>]
TA-meta-30	2:594953 - 2:694953	Cross/EAS/EUR	2:644953:G:A	rs7561317	Primary	TMEM18(-22.4kb)	intergenic	0.72	6	90.2	0.0014	--	0.14	-0.067	0.007	2.94e-24	0.09	-0.094	0.011	1.29e-18	0.172	-0.05	0.009	2.8e-09	TMEM18;PXDN	TMEM18	TMEM18 [nearest(intergenic) / Non_PAN_ABC (SI)] / PXDN [Non_PAN_ABC (SI)]
TA-meta-31	2:16524669 - 2:16624669	Cross/EUR	2:16574669:A:G	rs11680058	Primary	FAM49A(-156.1kb)	intergenic	0.24	53	74.2	0.0491	++	0.142	-0.045	0.008	1.2e-08	0.15	-0.027	0.012	0.0226	0.135	-0.058	0.01	2.08e-08	FAM49A	FAM49A	FAM49A [nearest(intergenic)]
TA-meta-32	2:25485543 - 2:25585543	Cross/EUR	2:25535543:T:C	rs34048824	Primary	DNMT3A	intronic	0.17	24	67	0.0819	++	0.334	-0.029	0.005	4.08e-09	0.2	-0.019	0.008	0.0124	0.431	-0.036	0.006	2.05e-08	DNMT3A;DTNB;POMC	DNMT3A	DNMT3A [nearest(intronic) / Pan-related <PAN_ABC (PAN_Nasser)>] / DTNB [Pan-related <PAN_ABC (PAN_Nasser)>] / POMC [Pan-related <PAN_ABC (PAN_Nasser)>]
TA-meta-33	2:27680940 - 2:27780940	Cross/EAS/EUR	2:27730940:T:C	rs1260326	Primary	GCKR	exonic	1	1	0	0.527	--	0.527	0.061	0.004	3.98e-44	0.464	0.059	0.006	3.55e-23	0.607	0.064	0.007	1.62e-22	GCKR;AC074117.10;ATRAID;C2orf16;CAD	GCKR	GCKR [nearest(exonic) / rs1260326 [VEP_Low: R2 (EAS:EUR=1:1)] / Non_PAN_SMR <Pos_Exp (THY)>] / AC074117.10 [Non_PAN_SMR <Pos_Exp (Adp-Vis)>] / ATRAID [Non_PAN_SMR <Pos_Exp (Blood)>] / C2orf16 [Non_PAN_SMR <Pos_Exp (THY)>] / CAD [Non_PAN_SMR <Pos_Exp (Blood)>]
TA-meta-34	2:40425022 - 2:40525022	Cross	2:40475022:C:G	rs1012311	Primary	SLC8A1	intronic	0.51	5	0	0.778	++	0.587	-0.028	0.005	1.84e-08	0.47	-0.029	0.006	1.42e-06	0.862	-0.026	0.009	0.00462	SLC8A1	SLC8A1	SLC8A1 [nearest(intronic)]
TA-meta-35	2:43543000 - 2:43643000	Cross/EUR	2:43593000:G:A	rs28470852	Primary	THADA	intronic	0.16	19	NA	NA	?+	0.906	0.122	0.011	3.46e-28	NA	NA	NA	NA	0.906	0.122	0.011	3.4e-28	THADA;AC010883.5;ZFP36L2	THADA	THADA [nearest(intronic) / rs7578597 [VEP_Medium: R2 (EAS:EUR=0.25:0.89)] / Non_PAN_SMR <Neg_Exp (Adp-Sub)>] / AC010883.5 [Non_PAN_SMR <Neg_Exp (Adp-Sub; Adp-Vis; THY; Co; Blood)>] / ZFP36L2 [Non_PAN_SMR <Neg_Exp (Adp-Sub)>]
TA-meta-36	2:45140056 - 2:45240056	Cross/EAS	2:45190056:A:AC	rs5830819	Primary	SIX3(+16.8kb)	intergenic	0.99	1	NA	NA	-?	0.407	0.048	0.006	6.68e-15	0.407	0.048	0.006	9e-15	NA	NA	NA	NA	SIX3	SIX3	SIX3 [nearest(intergenic)]
TA-meta-37	2:58905028 - 2:59005028	Cross/EAS/EUR	2:58955028:T:C	rs55767040	Primary	FANCL(+486.5kb)	intergenic	0.11	35	0	0.675	--	0.25	0.038	0.005	1.7e-13	0.178	0.041	0.008	2.22e-07	0.305	0.036	0.007	1.38e-07	FANCL	FANCL	FANCL [nearest(intergenic)]
TA-meta-38	2:58905028 - 2:59005028	Cross/EAS/EUR	2:59308101:G:A	rs7599151	Secondary	FANCL(+839.6kb)	intergenic	NA	NA	78.6	0.0308	++	0.358	0.026	0.005	1.36e-08	0.327	0.016	0.006	0.0111	0.389	0.036	0.006	3.2e-08	FANCL	FANCL	FANCL [nearest(intergenic)]
TA-meta-39	2:60536707 - 2:60636707	Cross/EAS/EUR	2:60586707:G:C	rs243018	Primary	BCL11A(-91.6kb)	intergenic	0.84	5	0	0.382	--	0.441	-0.055	0.005	4.28e-32	0.338	-0.051	0.007	1.94e-14	0.54	-0.059	0.006	1.76e-19	AC007381.3;BCL11A	BCL11A	AC007381.3 [Non_PAN_SMR <Pos_Exp (Blood)>] / BCL11A [nearest(intergenic)]
TA-meta-40	2:65595750 - 2:65695750	Cross/EAS/EUR	2:65645750:C:T	rs10166100	Primary	SPRED2	intronic	0.11	19	0	0.956	--	0.311	-0.053	0.005	9.12e-25	0.151	-0.053	0.009	7.62e-10	0.402	-0.054	0.006	1.7e-16	SPRED2;ACTR2;CEP68;RAB1A;SLC1A4	SPRED2	SPRED2 [nearest(intronic) / Very-Strongly-Pan-related <PAN_ABC (beta; alpha; acinar; ductal; PAN_Nasser)> / Non_PAN_ABC (Adp; LIV; MuSc; THY; ADR; Brain; SI; Co); Non_PAN_SMR <Neg_Exp (Blood)>] / ACTR2 [Very-Strongly-Pan-related <PAN_ABC (beta; alpha; acinar; ductal; PAN_Nasser)> / Non_PAN_ABC (Adp; LIV; MuSc; THY; ADR; Brain; Co)] / CEP68 [Pan-related <PAN_ABC (PAN_Nasser)> / Non_PAN_ABC (Adp; L…
TA-meta-41	2:65595750 - 2:65695750	Cross/EAS/EUR	2:65276736:A:G	rs2540951	Secondary	CEP68(-6.8kb)	intergenic	NA	NA	82.1	0.0183	++	0.354	-0.041	0.005	2.42e-19	0.326	-0.031	0.006	1.37e-06	0.384	-0.052	0.007	1.73e-15	ACTR2;AFTPH;CEP68;RAB1A;SLC1A4	CEP68	ACTR2 [Very-Strongly-Pan-related <PAN_ABC (beta; alpha; acinar; ductal; PAN_Nasser)> / Non_PAN_ABC (Adp; LIV; MuSc; THY; Brain; SI; Co)] / AFTPH [Very-Strongly-Pan-related <PAN_ABC (beta)> / Non_PAN_ABC (MuSc; Brain)] / CEP68 [nearest(intergenic) / Strongly-Pan-related <PAN_ABC (alpha; acinar; ductal; PAN_Nasser)> / Non_PAN_ABC (Adp; LIV; MuSc; THY; ADR; Brain; SI; Co); Non_PAN_SMR <Pos_Exp (Brai…
TA-meta-42	2:112203851 - 2:112303851	Cross	2:112253851:T:C	rs1345203	Primary	ANAPC1(-270kb)	intergenic	0.3	37	0	0.469	++	0.343	-0.035	0.006	3.82e-10	0.453	-0.031	0.007	3.08e-05	0.208	-0.039	0.008	2.02e-06	MIR4435-1HG;ANAPC1	MIR4435-1HG	MIR4435-1HG [Pan-related <PAN_ABC (PAN_Nasser)> / Non_PAN_ABC (LIV; MuSc; Brain)] / ANAPC1 [nearest(intergenic)]
TA-meta-43	2:120181070 - 2:120281070	Cross/EAS	2:120231070:C:G	rs3731600	Primary	SCTR	exonic	0.95	1	NA	NA	+?	0.033	-0.122	0.02	1.7e-09	0.033	-0.122	0.02	1.61e-09	NA	NA	NA	NA	SCTR	SCTR	SCTR [nearest(exonic) / rs3731600 [VEP_Medium: R2 (EAS:EUR=1:1)]]
TA-meta-44	2:121297612 - 2:121397612	Cross/EUR	2:121347612:G:C	rs11688682	Primary	LINC01101(+123.9kb)	intergenic	0.13	11	88.9	0.00274	--	0.24	-0.048	0.007	1.94e-12	0.095	-0.004	0.016	0.782	0.272	-0.058	0.008	2.93e-14	INHBB;LINC01101	LINC01101	INHBB [Non_PAN_SMR <Neg_Exp (Adp-Sub)>] / LINC01101 [nearest(intergenic)]
TA-meta-45	2:121297612 - 2:121397612	Cross/EUR	2:121438846:T:C	rs6727128	Secondary	GLI2(-54.4kb)	intergenic	NA	NA	0	0.613	++	0.098	-0.048	0.008	2.74e-10	0.11	-0.045	0.01	4.48e-06	0.079	-0.053	0.012	1.23e-05	GLI2	GLI2	GLI2 [nearest(intergenic)]
TA-meta-46	2:146310626 - 2:146410626	Cross	2:146360626:T:G	rs12463464	Primary	ZEB2(+1.1Mb)	intergenic	0.03	47	0	0.9	++	0.487	-0.024	0.004	2.53e-08	0.427	-0.025	0.006	3.4e-05	0.555	-0.024	0.006	0.000194	ZEB2	ZEB2	ZEB2 [nearest(intergenic)]
TA-meta-47	2:149486710 - 2:149586710	Cross/EAS	2:149536710:C:CA	rs11452418	Primary	EPC2	intronic	0.54	72	NA	NA	-?	0.439	-0.036	0.006	2.97e-09	0.439	-0.036	0.006	3.12e-09	NA	NA	NA	NA	EPC2	EPC2	EPC2 [nearest(intronic)]
TA-meta-48	2:158279237 - 2:158379237	Cross/EUR	2:158329237:G:A	rs16841827	Primary	CYTIP	intronic	0.14	20	72.1	0.0582	+-	0.06	-0.076	0.013	3.71e-09	0.011	0.021	0.053	0.688	0.063	-0.082	0.013	6.34e-10	CYTIP;ACVR1C	CYTIP	CYTIP [nearest(intronic) / Non_PAN_ABC (LIV; Co)] / ACVR1C [rs7594480 [VEP_Medium: R2 (EAS:EUR=0.67:0.86)]]
TA-meta-49	2:161999999 - 2:162099999	Cross	2:162049999:G:A	rs1267073	Primary	TANK	intronic	0.1	29	35.5	0.213	--	0.317	-0.027	0.005	1.39e-08	0.331	-0.021	0.006	0.00106	0.301	-0.033	0.007	1.67e-06	AC009299.3;PSMD14;TANK;FAP;GCA	TANK	AC009299.3 [Pan-related <PAN_ABC (PAN_Nasser)> / Non_PAN_ABC (LIV; MuSc; Brain; Co)] / PSMD14 [Pan-related <PAN_ABC (PAN_Nasser)> / Non_PAN_ABC (Brain; Co)] / TANK [nearest(intronic)] / FAP [Non_PAN_ABC (Brain)] / GCA [Non_PAN_ABC (Brain)]
TA-meta-50	2:163599480 - 2:163699480	Cross	2:163649480:C:T	rs12614955	Primary	KCNH7	intronic	0.11	58	55.4	0.134	++	0.575	0.025	0.005	2.33e-08	0.481	0.02	0.006	0.00109	0.703	0.033	0.007	1.93e-06	KCNH7;LOC101929570	KCNH7	KCNH7 [nearest(intronic) / Very-Strongly-Pan-related <PAN_ABC (beta)> / Non_PAN_ABC (ADR; Brain)] / LOC101929570 [Very-Strongly-Pan-related <PAN_ABC (beta; alpha)>]
TA-meta-51	2:165478876 - 2:165578876	Cross/EAS/EUR	2:165528876:C:T	rs13389219	Primary	COBLL1	intronic	0.47	3	0	0.89	--	0.316	-0.061	0.005	2.68e-28	0.092	-0.062	0.011	2.76e-09	0.401	-0.06	0.006	1.17e-20	COBLL1;GRB14	COBLL1	COBLL1 [nearest(intronic) / Non_PAN_SMR <Pos_Exp (Brain) / Neg_Exp (Blood)>] / GRB14 [Non_PAN_SMR <Pos_Exp (Blood)>]
TA-meta-52	2:165478876 - 2:165578876	Cross/EAS/EUR	2:165559856:A:G	rs35492512	Secondary	COBLL1	intronic	NA	NA	0	0.456	--	0.059	0.014	0.01	0.151	0.035	0.004	0.017	0.796	0.073	0.02	0.012	0.109	COBLL1;GRB14;GALNT3;SCN9A;TTC21B	COBLL1	COBLL1 [nearest(intronic) / Non_PAN_ABC (LIV; THY; SI; Co); Non_PAN_SMR <Pos_Exp (Brain) / Neg_Exp (Blood)>] / GRB14 [Non_PAN_ABC (LIV; Co); Non_PAN_SMR <Pos_Exp (Blood)>] / GALNT3 [Non_PAN_ABC (LIV)] / SCN9A [Non_PAN_ABC (LIV; Co)] / TTC21B [Non_PAN_ABC (Co)]
TA-meta-53	2:165478876 - 2:165578876	Cross/EAS/EUR	2:165636332:T:C	rs355897	Secondary	COBLL1	intronic	NA	NA	0	0.501	++	0.444	-0.034	0.004	1.23e-14	0.445	-0.031	0.006	2.73e-07	0.444	-0.037	0.006	7.58e-09	COBLL1;GRB14	COBLL1	COBLL1 [nearest(intronic) / Non_PAN_SMR <Pos_Exp (Brain) / Neg_Exp (Blood)>] / GRB14 [Non_PAN_SMR <Pos_Exp (Blood)>]
TA-meta-54	2:166561006 - 2:166661006	Cross	2:166611006:C:T	rs62174818	Primary	GALNT3	intronic	0.28	26	0	0.504	--	0.413	-0.027	0.004	3.34e-09	0.328	-0.024	0.006	0.000204	0.5	-0.03	0.006	3.58e-06	GALNT3;SCN2A;SCN3A;SCN9A;TTC21B	GALNT3	GALNT3 [nearest(intronic) / Non_PAN_ABC (MuSc)] / SCN2A [Non_PAN_ABC (MuSc)] / SCN3A [Non_PAN_ABC (MuSc)] / SCN9A [Non_PAN_ABC (MuSc)] / TTC21B [Non_PAN_ABC (MuSc)]
TA-meta-55	2:172361737 - 2:172461737	Cross	2:172411737:C:A	rs950163	Primary	CYBRD1	3UTR	0.2	17	0	0.651	++	0.503	0.026	0.005	2.93e-08	0.368	0.024	0.006	0.000128	0.671	0.028	0.007	5.4e-05	CYBRD1	CYBRD1	CYBRD1 [nearest(3UTR) / rs10455 [VEP_Low: R2 (EAS:EUR=1:1)]]
TA-meta-56	2:181526526 - 2:181626526	Cross	2:181576526:T:A	rs56655718	Primary	UBE2E3(-255.4kb)	intergenic	0.24	20	0	0.879	--	0.3	-0.034	0.005	8.79e-12	0.237	-0.034	0.007	1.63e-06	0.358	-0.033	0.007	1.44e-06	UBE2E3	UBE2E3	UBE2E3 [nearest(intergenic)]
TA-meta-57	2:196601292 - 2:196701292	Cross	2:196651292:G:T	rs13014191	Primary	DNAH7	intronic	0.56	54	64	0.0954	--	0.471	-0.029	0.005	1.43e-09	0.367	-0.037	0.007	6.96e-08	0.568	-0.021	0.007	0.00145	SLC39A10;DNAH7;GTF3C3;LOC100130452;LOC101927482	SLC39A10	SLC39A10 [Very-Strongly-Pan-related <PAN_ABC (beta; PAN_Nasser)> / Non_PAN_ABC (Adp; LIV; MuSc; ADR; Brain; SI; Co); Non_PAN_SMR <Pos_Exp (Blood)>] / DNAH7 [nearest(intronic) / Strongly-Pan-related <PAN_ABC (PAN_Nasser) / PAN-SMR (Neg_Exp)> / Non_PAN_ABC (LIV; MuSc; ADR; Brain; SI; Co); Non_PAN_SMR <Pos_Exp (Brain; Blood) / Neg_Exp (Adp-Sub; Adp-Vis; THY)>] / GTF3C3 [Very-Strongly-Pan-related <PA…
TA-meta-58	2:203238774 - 2:203338774	Cross	2:203288774:T:G	rs10206674	Primary	BMPR2	intronic	0.15	109	0	0.95	--	0.105	0.045	0.008	1.59e-08	0.084	0.044	0.012	0.000279	0.12	0.045	0.01	1.42e-05	BMPR2;NOP58;SUMO1;AC079354.1;FAM117B	BMPR2	BMPR2 [nearest(intronic) / Strongly-Pan-related <PAN_ABC (acinar; ductal; PAN_Nasser)> / Non_PAN_ABC (Adp; LIV; MuSc; THY; ADR; Brain; SI; Co)] / NOP58 [Very-Strongly-Pan-related <PAN_ABC (beta; alpha; acinar; ductal; PAN_Nasser)> / Non_PAN_ABC (Adp; LIV; MuSc; THY; ADR; Brain; SI; Co)] / SUMO1 [Very-Strongly-Pan-related <PAN_ABC (beta; alpha; acinar; ductal; PAN_Nasser)> / Non_PAN_ABC (Adp; LIV;…
TA-meta-59	2:208837929 - 2:208937929	Cross	2:208887929:G:A	rs35735821	Primary	PLEKHM3	intronic	0.1	17	46.8	0.17	--	0.511	-0.027	0.005	1.03e-08	0.403	-0.02	0.007	0.00349	0.607	-0.033	0.006	3.15e-07	PLEKHM3;FZD5;C2orf80;IDH1;IDH1-AS1	PLEKHM3	PLEKHM3 [nearest(intronic) / Pan-related <PAN_ABC (PAN_Nasser)> / Non_PAN_ABC (Adp; LIV; MuSc; THY; ADR; Brain; SI; Co)] / FZD5 [Pan-related <PAN_ABC (PAN_Nasser)> / Non_PAN_ABC (Adp; MuSc; ADR; Brain)] / C2orf80 [Non_PAN_ABC (Adp; Brain)] / IDH1 [Non_PAN_ABC (Brain)] / IDH1-AS1 [Non_PAN_ABC (Brain)]
TA-meta-60	2:213637103 - 2:213737103	Cross/EAS	2:213687103:T:C	rs75179644	Primary	IKZF2(-177.3kb)	intergenic	0.87	2	0	0.673	+-	0.098	-0.073	0.011	1.02e-10	0.099	-0.073	0.011	1.08e-10	0.002	0.003	0.181	0.986	IKZF2	IKZF2	IKZF2 [nearest(intergenic)]
TA-meta-61	2:219109770 - 2:219209770	Cross	2:219159770:A:G	rs1399132	Primary	PNKD	intronic	0.05	60	9.5	0.293	--	0.402	0.026	0.004	3.13e-09	0.398	0.03	0.006	5.04e-07	0.407	0.021	0.006	0.00115	AAMP;ARPC2;PNKD;TMBIM1;GPBAR1	PNKD	AAMP [Very-Strongly-Pan-related <PAN_ABC (beta; alpha; acinar; ductal; PAN_Nasser)> / Non_PAN_ABC (Adp; LIV; MuSc; THY; ADR; Brain; SI; Co); Non_PAN_SMR <Pos_Exp (Blood)>] / ARPC2 [Very-Strongly-Pan-related <PAN_ABC (beta; alpha; acinar; ductal; PAN_Nasser)> / Non_PAN_ABC (Adp; LIV; MuSc; ADR; Brain; SI; Co); Non_PAN_SMR <Pos_Exp (MuSc)>] / PNKD [nearest(intronic) / Very-Strongly-Pan-related <PAN…
TA-meta-62	2:227058446 - 2:227158446	Cross/EUR	2:227108446:T:C	rs2943652	Primary	IRS1(-487.6kb)	intergenic	0.19	22	87	0.00549	++	0.29	-0.082	0.006	8.29e-47	0.08	-0.055	0.011	1.01e-06	0.364	-0.091	0.007	2.71e-43	AC068138.1;IRS1	IRS1	AC068138.1 [Non_PAN_SMR <Neg_Exp (MuSc)>] / IRS1 [nearest(intergenic)]
TA-meta-63	2:234141103 - 2:234241103	Cross/EAS	2:234191103:T:A	rs117809958	Primary	ATG16L1	intronic	0.99	1	0	0.945	++	0.018	0.21	0.024	6.19e-18	0.019	0.21	0.025	1.02e-17	0.002	0.198	0.173	0.252	ATG16L1	ATG16L1	ATG16L1 [nearest(intronic)]
TA-meta-64	2:234141103 - 2:234241103	Cross/EAS	2:234285256:T:C	rs838710	Secondary	DGKD	intronic	NA	NA	85.1	0.00956	--	0.401	0.031	0.004	1.72e-12	0.411	0.042	0.006	6.56e-12	0.391	0.019	0.006	0.00326	DGKD;ARL4C;ATG16L1;DIS3L2;SAG	DGKD	DGKD [nearest(intronic) / Pan-related <PAN_ABC (PAN_Nasser)> / Non_PAN_ABC (Adp; LIV; MuSc; ADR; Brain; SI; Co)] / ARL4C [Non_PAN_ABC (MuSc; SI)] / ATG16L1 [Non_PAN_ABC (MuSc; ADR; SI)] / DIS3L2 [Non_PAN_ABC (MuSc)] / SAG [Non_PAN_ABC (ADR)]
TA-meta-65	2:239810535 - 2:239910535	Cross	2:239860535:G:C	rs11124186	Primary	TWIST2(+64.6kb)	intergenic	0.44	11	0	0.587	--	0.288	-0.03	0.005	3.14e-09	0.333	-0.028	0.006	1.49e-05	0.213	-0.034	0.008	4.86e-05	TWIST2	TWIST2	TWIST2 [nearest(intergenic) / Non_PAN_ABC (Adp)]
TA-meta-66	3:9468511 - 3:9568511	Cross	3:9518511:C:T	rs2279440	Primary	SETD5	3UTR	0.46	10	0	0.913	++	0.119	0.046	0.007	2.54e-11	0.093	0.046	0.01	5.62e-06	0.139	0.045	0.009	1.1e-06	SETD5;THUMPD3;THUMPD3-AS1;ATG7;TAMM41	SETD5	SETD5 [nearest(3UTR) / Very-Strongly-Pan-related <PAN_ABC (beta; PAN_Nasser)> / Non_PAN_ABC (Adp; LIV; MuSc; ADR; Brain; SI; Co)] / THUMPD3 [rs1129174 [VEP_Low: R2 (EAS:EUR=0.9:ND)] / Very-Strongly-Pan-related <PAN_ABC (beta; alpha; acinar; ductal; PAN_Nasser)> / Non_PAN_ABC (Adp; LIV; MuSc; THY; ADR; Brain; SI; Co); Non_PAN_SMR <Pos_Exp (Blood)>] / THUMPD3-AS1 [Very-Strongly-Pan-related <PAN_ABC…
TA-meta-67	3:12315308 - 3:12415308	Cross/EAS/EUR	3:12365308:G:T	rs13083375	Primary	PPARG	intronic	0.21	7	0	0.808	--	0.102	-0.102	0.008	5.86e-35	0.039	-0.099	0.016	4.6e-10	0.126	-0.103	0.01	3.03e-26	PPARG;TIMP4;SYN2;TSEN2	PPARG	PPARG [nearest(intronic) / rs1801282 [VEP_Low: R2 (EAS:EUR=0.99:0.98)] / Pan-related <PAN_ABC (PAN_Nasser)> / Non_PAN_ABC (Adp; LIV; MuSc; THY; ADR; SI; Co)] / TIMP4 [Non_PAN_ABC (Adp; Co); Non_PAN_SMR <Neg_Exp (Adp-Sub; Adp-Vis)>] / SYN2 [Non_PAN_SMR <Neg_Exp (Brain)>] / TSEN2 [Non_PAN_ABC (Adp)]
TA-meta-68	3:12315308 - 3:12415308	Cross/EAS/EUR	3:12493079:A:G	rs4684856	Secondary	PPARG(+17.2kb)	intergenic	NA	NA	0	0.503	++	0.443	-0.028	0.005	2.44e-07	0.111	-0.022	0.01	0.0272	0.576	-0.03	0.006	2.26e-06	PPARG;TIMP4	PPARG	PPARG [nearest(intergenic)] / TIMP4 [Non_PAN_SMR <Neg_Exp (Adp-Sub; Adp-Vis)>]
TA-meta-69	3:15656124 - 3:15756124	Cross	3:15706124:G:A	rs924753	Primary	ANKRD28(-2.6kb)	intergenic	0.09	65	69.4	0.0705	--	0.472	-0.026	0.005	6.88e-09	0.347	-0.018	0.006	0.00418	0.602	-0.035	0.006	8.29e-08	ANKRD28;DPH3;EAF1;MRPS25;OXNAD1	MRPS25	ANKRD28 [nearest(intergenic) / rs2470549 [VEP_Low: R2 (EAS:EUR=0.79:0.97)] / Pan-related <PAN_ABC (PAN_Nasser)> / Non_PAN_ABC (Adp; LIV; MuSc; THY; ADR; Brain; SI; Co); Non_PAN_SMR <Pos_Exp (Brain)>] / DPH3 [Very-Strongly-Pan-related <PAN_ABC (beta; alpha; acinar; ductal; PAN_Nasser)> / Non_PAN_ABC (LIV; MuSc; Brain; Co)] / EAF1 [Strongly-Pan-related <PAN_ABC (alpha; acinar; ductal; PAN_Nasser)> …
TA-meta-70	3:23404790 - 3:23504790	Cross/EAS/EUR	3:23454790:A:G	rs1496653	Primary	UBE2E2	intronic	0.98	1	89.3	0.00226	++	0.196	-0.084	0.006	2.41e-51	0.181	-0.1	0.008	1.62e-37	0.211	-0.066	0.008	2.49e-17	UBE2E2;UBE2E2-AS1;UBE2E1;UBE2E1-AS1;ZNF385D	UBE2E2	UBE2E2 [nearest(intronic) / Pan-related <PAN_ABC (alpha; PAN_Nasser)> / Non_PAN_ABC (MuSc; Brain; Co); Non_PAN_SMR <Neg_Exp (THY)>] / UBE2E2-AS1 [Pan-related <PAN_ABC (alpha; PAN_Nasser)> / Non_PAN_ABC (MuSc; Brain; Co)] / UBE2E1 [Non_PAN_ABC (MuSc; Brain)] / UBE2E1-AS1 [Non_PAN_ABC (MuSc; Brain)] / ZNF385D [Non_PAN_ABC (MuSc)]
TA-meta-71	3:23404790 - 3:23504790	Cross/EAS/EUR	3:23551971:G:A	rs60410861	Secondary	UBE2E2	intronic	NA	NA	0	0.561	++	0.122	0.103	0.008	3.54e-41	0.142	0.101	0.009	4.14e-32	0.035	0.112	0.018	1.56e-10	UBE2E2;MIR548AC;UBE2E1;UBE2E1-AS1;ZNF385D	UBE2E2	UBE2E2 [nearest(intronic) / Non_PAN_ABC (Adp; Brain)] / MIR548AC [Non_PAN_ABC (Adp)] / UBE2E1 [Non_PAN_ABC (Adp; Brain)] / UBE2E1-AS1 [Non_PAN_ABC (Adp; Brain)] / ZNF385D [Non_PAN_ABC (Adp)]
TA-meta-72	3:46875539 - 3:46975539	Cross	3:46925539:C:T	rs11926707	Primary	PTH1R	intronic	0.32	14	67	0.0816	--	0.34	-0.027	0.005	1.13e-08	0.308	-0.019	0.007	0.00532	0.372	-0.035	0.007	1.38e-07	PTH1R	PTH1R	PTH1R [nearest(intronic) / Non_PAN_ABC (LIV)]
TA-meta-73	3:50124197 - 3:50224197	Cross/EUR	3:50174197:T:G	rs2624847	Primary	RBM5(+17.7kb)	intergenic	0.78	48	0	0.612	--	0.209	0.038	0.005	2.46e-12	0.158	0.035	0.008	1.71e-05	0.251	0.041	0.007	3.48e-08	RBM6;SEMA3F;MST1R;RBM5;RP11-493K19.3	SEMA3F	RBM6 [Pan-related <PAN-SMR (Neg_Exp)> / Non_PAN_SMR <Pos_Exp (LIV; Brain; Co) / Neg_Exp (Adp-Sub; Adp-Vis; MuSc; THY; ADR; PIT; SI; Blood)>] / SEMA3F [Non_PAN_ABC (THY); Non_PAN_SMR <Pos_Exp (Brain)>] / MST1R [Non_PAN_SMR <Pos_Exp (MuSc; Brain)>] / RBM5 [nearest(intergenic)] / RP11-493K19.3 [Non_PAN_ABC (THY)]
TA-meta-74	3:52866916 - 3:52966916	Cross/EUR	3:52916916:C:T	rs9876403	Primary	TMEM110-MUSTN1:TMEM110	intronic:intronic	0.07	145	0	0.582	++	0.316	0.028	0.005	5.21e-09	0.362	0.026	0.006	2.65e-05	0.246	0.031	0.008	4.22e-05	ITIH4;TMEM110-MUSTN1;NEK4;SFMBT1;TMEM110	TMEM110-MUSTN1	ITIH4 [rs13072536 [VEP_Medium: R2 (EAS:EUR=0.91:0.86)] / Strongly-Pan-related <PAN_ABC (acinar; PAN_Nasser)> / Non_PAN_ABC (LIV; MuSc); Non_PAN_SMR <Pos_Exp (Adp-Sub; Adp-Vis; THY; Brain; PIT; Co; Blood)>] / TMEM110-MUSTN1 [nearest(intronic:intronic) / Very-Strongly-Pan-related <PAN_ABC (beta; alpha; PAN_Nasser)> / Non_PAN_ABC (Adp; LIV; MuSc; THY; Brain; Co)] / NEK4 [Very-Strongly-Pan-related <P…
TA-meta-75	3:54778827 - 3:54878827	Cross/EUR	3:54828827:G:T	rs76263492	Primary	CACNA2D3	intronic	0.75	3	NA	NA	?+	0.045	0.09	0.016	8.92e-09	NA	NA	NA	NA	0.045	0.09	0.016	8.94e-09	CACNA2D3;CACNA2D3-AS1	CACNA2D3	CACNA2D3 [nearest(intronic)] / CACNA2D3-AS1 [Non_PAN_ABC (MuSc; ADR)]
TA-meta-76	3:58314735 - 3:58414735	Cross	3:58364735:T:C	rs7430287	Primary	PXK	intronic	0.06	103	0	0.501	++	0.484	-0.03	0.005	1.16e-08	0.221	-0.033	0.007	5.8e-06	0.755	-0.026	0.007	0.000447	PDHB;PXK;ABHD6;FAM107A;KCTD6	PXK	PDHB [Very-Strongly-Pan-related <PAN_ABC (beta; alpha; acinar; ductal; PAN_Nasser)> / Non_PAN_ABC (Adp; LIV; MuSc; THY; ADR; Brain; SI; Co); Non_PAN_SMR <Pos_Exp (Blood)>] / PXK [nearest(intronic) / rs4681852 [VEP_High: R2 (EAS:EUR=0.9:ND)] / Pan-related <PAN_ABC (PAN_Nasser)> / Non_PAN_ABC (Adp; LIV; MuSc; THY; ADR; Brain; SI; Co)] / ABHD6 [Very-Strongly-Pan-related <PAN_ABC (beta; alpha; PAN_Na…
TA-meta-77	3:58314735 - 3:58414735	Cross	3:58595376:A:G	rs900871	Secondary	FAM107A	intronic	NA	NA	0	0.508	--	0.121	0.035	0.007	1.95e-07	0.13	0.031	0.009	0.000422	0.108	0.04	0.01	8.94e-05	FAM107A;ACOX2;C3orf67;PDHB;RP11-475O23.3	FAM107A	FAM107A [nearest(intronic) / Very-Strongly-Pan-related <PAN_ABC (beta; PAN_Nasser)> / Non_PAN_ABC (MuSc; Brain; SI)] / ACOX2 [Non_PAN_ABC (LIV; MuSc; Brain)] / C3orf67 [Non_PAN_ABC (MuSc)] / PDHB [Non_PAN_SMR <Pos_Exp (Blood)>] / RP11-475O23.3 [Non_PAN_ABC (THY)]
TA-meta-78	3:63129421 - 3:63229421	Cross	3:63179421:G:A	rs1900575	Primary	SYNPR(-34.6kb)	intergenic	0.13	69	0	0.722	--	0.584	-0.028	0.005	1.16e-08	0.462	-0.029	0.006	1.24e-06	0.831	-0.025	0.009	0.00264	SYNPR	SYNPR	SYNPR [nearest(intergenic)]
TA-meta-79	3:63892188 - 3:63992188	Cross/EAS/EUR	3:63942188:C:G	rs28675788	Primary	ATXN7	intronic	0.82	4	0	0.658	++	0.301	-0.074	0.005	4.21e-45	0.372	-0.075	0.006	2.7e-33	0.128	-0.07	0.01	6.53e-13	THOC7;ATXN7;C3orf14;CADPS;PSMD6-AS2	THOC7	THOC7 [Very-Strongly-Pan-related <PAN_ABC (beta; alpha; acinar; ductal; PAN_Nasser)> / Non_PAN_ABC (Adp; LIV; MuSc; THY; ADR; Brain; SI; Co); Non_PAN_SMR <Neg_Exp (Brain)>] / ATXN7 [nearest(intronic) / Pan-related <PAN_ABC (alpha; PAN_Nasser)> / Non_PAN_ABC (Adp; LIV; MuSc; THY; ADR; Brain; SI; Co); Non_PAN_SMR <Neg_Exp (Blood)>] / C3orf14 [Strongly-Pan-related <PAN_ABC (acinar; ductal; PAN_Nasse…
TA-meta-80	3:64652275 - 3:64752275	Cross/EUR	3:64702275:C:G	rs4616635	Primary	ADAMTS9(+28.6kb)	intergenic	0.58	4	89.1	0.00247	++	0.257	-0.038	0.005	5.11e-14	0.236	-0.023	0.007	0.00156	0.279	-0.053	0.007	9.76e-14	ADAMTS9	ADAMTS9	ADAMTS9 [nearest(intergenic)]
TA-meta-81	3:70466421 - 3:70566421	Cross	3:70516421:G:A	rs10510998	Primary	FOXP1(-487.4kb)	intergenic	0.22	7	0	0.563	++	0.457	0.026	0.004	6.47e-09	0.359	0.024	0.006	0.000176	0.559	0.029	0.006	7e-06	FOXP1	FOXP1	FOXP1 [nearest(intergenic)]
TA-meta-82	3:90342461 - 3:90442461	Cross	3:90392461:C:T	rs55635962	Primary	EPHA3(+861.2kb)	intergenic	0.69	9	28	0.239	++	0.204	0.038	0.006	5.11e-09	0.124	0.048	0.011	9.55e-06	0.248	0.032	0.008	6.16e-05	EPHA3	EPHA3	EPHA3 [nearest(intergenic)]
TA-meta-83	3:93843210 - 3:93943210	Cross	3:93893210:G:A	rs9857105	Primary	NSUN3(+45.8kb)	intergenic	0.53	128	0	0.655	++	0.375	0.026	0.005	2.73e-08	0.295	0.024	0.007	0.000328	0.452	0.028	0.007	1.91e-05	DHFRL1;NSUN3	NSUN3	DHFRL1 [Non_PAN_SMR <Pos_Exp (Blood)>] / NSUN3 [nearest(intergenic)]
TA-meta-84	3:112953924 - 3:113053924	Cross	3:113003924:G:A	rs16860787	Primary	BOC	intronic	0.04	88	0	0.568	++	0.367	0.029	0.005	1.94e-09	0.461	0.031	0.006	2e-07	0.182	0.025	0.008	0.00243	BOC;RP11-572M11.3;SIDT1;SPICE1;WDR52	BOC	BOC [nearest(intronic) / rs3814398 [VEP_Low: R2 (EAS:EUR=0.92:0.82)] / Pan-related <PAN_ABC (PAN_Nasser)> / Non_PAN_ABC (Adp; MuSc; Brain; Co)] / RP11-572M11.3 [Pan-related <PAN_ABC (PAN_Nasser)> / Non_PAN_ABC (Brain)] / SIDT1 [Pan-related <PAN_ABC (PAN_Nasser)>] / SPICE1 [Pan-related <PAN_ABC (PAN_Nasser)> / Non_PAN_ABC (Brain)] / WDR52 [Pan-related <PAN_ABC (PAN_Nasser)> / Non_PAN_ABC (Brain)]
TA-meta-85	3:114910798 - 3:115010798	Cross/EAS	3:114960798:C:A	rs1459513	Primary	ZBTB20(+94.7kb)	intergenic	0.1	26	31.4	0.227	--	0.491	-0.047	0.006	1.26e-16	0.396	-0.044	0.006	1.68e-12	0.939	-0.062	0.014	5.38e-06	ZBTB20-AS4;ZBTB20	ZBTB20-AS4	ZBTB20-AS4 [Pan-related <PAN_ABC (PAN_Nasser)> / Non_PAN_ABC (Adp; LIV; MuSc; THY; ADR; Brain; SI; Co)] / ZBTB20 [nearest(intergenic)]
TA-meta-86	3:121915199 - 3:122015199	Cross/EAS	3:121965199:T:G	rs9859381	Primary	CASR	intronic	0.1	33	2.9	0.31	--	0.596	0.031	0.005	1.19e-09	0.487	0.034	0.006	1.14e-08	0.871	0.023	0.01	0.0172	CASR	CASR	CASR [nearest(intronic) / Very-Strongly-Pan-related <PAN_ABC (beta)>]
TA-meta-87	3:123015778 - 3:123115778	Cross/EAS/EUR	3:123065778:G:A	rs11708067	Primary	ADCY5	intronic	0.12	8	NA	NA	?+	0.775	0.088	0.008	2.23e-30	NA	NA	NA	NA	0.775	0.088	0.008	5.05e-30	ADCY5	ADCY5	ADCY5 [nearest(intronic) / Pan-related <PAN_ABC (ductal; PAN_Nasser)> / Non_PAN_ABC (LIV)]
TA-meta-88	3:124871457 - 3:124971457	Cross/EAS/EUR	3:124921457:C:T	rs9873519	Primary	SLC12A8	intronic	0.97	1	0	0.699	++	0.441	0.039	0.005	3.54e-16	0.32	0.041	0.007	7.48e-09	0.538	0.037	0.006	6.29e-09	SLC12A8;ZNF148	SLC12A8	SLC12A8 [nearest(intronic) / Pan-related <PAN-SMR (Neg_Exp)> / Non_PAN_SMR <Neg_Exp (LIV)>] / ZNF148 [Non_PAN_SMR <Pos_Exp (Blood)>]
TA-meta-89	3:131700352 - 3:131800352	Cross	3:131750352:C:T	rs1406779	Primary	CPNE4	intronic	0.21	6	0	0.813	++	0.244	0.033	0.006	4.39e-09	0.104	0.031	0.01	0.00147	0.314	0.034	0.007	7.93e-07	CPNE4	CPNE4	CPNE4 [nearest(intronic) / Very-Strongly-Pan-related <PAN_ABC (beta; PAN_Nasser)> / Non_PAN_ABC (MuSc; Brain; Co)]
TA-meta-90	3:150016540 - 3:150116540	Cross/EUR	3:150066540:T:A	rs62271373	Primary	TSC22D2(-59.6kb)	intergenic	0.99	1	NA	NA	?+	0.055	0.088	0.014	9.07e-10	NA	NA	NA	NA	0.055	0.088	0.014	1.03e-09	TSC22D2	TSC22D2	TSC22D2 [nearest(intergenic)]
TA-meta-91	3:152332636 - 3:152432636	Cross/EAS/EUR	3:152382636:G:A	rs1517240	Primary	P2RY1(-170.1kb)	intergenic	0.18	8	0	0.787	++	0.285	0.037	0.005	2.6e-14	0.274	0.038	0.007	1.13e-08	0.296	0.035	0.007	5.23e-07	P2RY1	P2RY1	P2RY1 [nearest(intergenic) / Non_PAN_ABC (Brain)]
TA-meta-92	3:152332636 - 3:152432636	Cross/EAS/EUR	3:151993809:T:A	rs1426608	Secondary	MBNL1	intronic	NA	NA	0	0.753	--	0.511	-0.032	0.004	7.27e-13	0.484	-0.031	0.006	6.46e-07	0.543	-0.033	0.006	2.67e-07	MBNL1;MBNL1-AS1;TMEM14E;AADAC;SUCNR1	MBNL1	MBNL1 [nearest(intronic) / Very-Strongly-Pan-related <PAN_ABC (beta; alpha; ductal; PAN_Nasser)> / Non_PAN_ABC (Adp; LIV; MuSc; THY; ADR; Brain; SI; Co)] / MBNL1-AS1 [Very-Strongly-Pan-related <PAN_ABC (beta; alpha; PAN_Nasser)> / Non_PAN_ABC (Adp; LIV; MuSc; THY; ADR; Brain; Co)] / TMEM14E [Pan-related <PAN_ABC (PAN_Nasser)> / Non_PAN_ABC (Adp; MuSc; Co)] / AADAC [Non_PAN_ABC (ADR)] / SUCNR1 [NA]
TA-meta-93	3:152332636 - 3:152432636	Cross/EAS/EUR	3:152444191:C:A	rs78636887	Secondary	P2RY1(-108.5kb)	intergenic	NA	NA	24	0.251	+-	0.042	-0.092	0.016	8.13e-09	0.003	0.015	0.095	0.875	0.043	-0.095	0.016	4.46e-09	P2RY1	P2RY1	P2RY1 [nearest(intergenic)]
TA-meta-94	3:160251365 - 3:160351365	Cross	3:160301365:T:C	rs4679899	Primary	KPNA4(+18kb)	intergenic	0.02	110	0	0.776	++	0.418	-0.027	0.005	8.64e-09	0.256	-0.026	0.007	0.000191	0.562	-0.028	0.006	1.13e-05	KPNA4;ARL14;SCARNA7;SCHIP1;TRIM59	KPNA4	KPNA4 [nearest(intergenic) / Very-Strongly-Pan-related <PAN_ABC (beta; alpha; acinar; ductal; PAN_Nasser)> / Non_PAN_ABC (Adp; LIV; MuSc; THY; ADR; Brain; SI; Co); Non_PAN_SMR <Pos_Exp (Brain; Blood)>] / ARL14 [Strongly-Pan-related <PAN_ABC (acinar; ductal; PAN_Nasser)> / Non_PAN_ABC (MuSc; THY; ADR; Brain; SI; Co)] / SCARNA7 [Strongly-Pan-related <PAN_ABC (acinar)> / Non_PAN_ABC (Adp)] / SCHIP1 …
TA-meta-95	3:168173132 - 3:168273132	Cross/EUR	3:168223132:G:A	rs7642311	Primary	GOLIM4(+409.4kb)	intergenic	0.19	18	NA	NA	?+	0.872	0.054	0.01	1.37e-08	NA	NA	NA	NA	0.872	0.054	0.01	1.53e-08	EGFEM1P;GOLIM4;LINC02082	GOLIM4	EGFEM1P [NA] / GOLIM4 [nearest(intergenic)] / LINC02082 [NA]
TA-meta-96	3:170674883 - 3:170774883	Cross/EAS/EUR	3:170724883:T:C	rs8192675	Primary	SLC2A2	intronic	0.93	3	81.3	0.0209	++	0.256	-0.055	0.005	1.37e-27	0.223	-0.043	0.007	3.38e-09	0.288	-0.066	0.007	5.77e-21	SLC2A2;EIF5A2;RPL22L1	SLC2A2	SLC2A2 [nearest(intronic) / rs5398 [VEP_Medium: R2 (EAS:EUR=0.94:0.99)] / Very-Strongly-Pan-related <PAN_ABC (beta)> / Non_PAN_ABC (LIV; Brain; SI; Co)] / EIF5A2 [Non_PAN_SMR <Neg_Exp (Brain; Blood)>] / RPL22L1 [Non_PAN_SMR <Neg_Exp (Blood)>]
TA-meta-97	3:173064305 - 3:173164305	Cross	3:173114305:G:A	rs529200	Primary	NLGN1	5UTR	0.49	7	0	0.834	--	0.433	-0.025	0.004	2.41e-08	0.401	-0.024	0.006	0.000136	0.464	-0.026	0.006	4.09e-05	NLGN1;TNFSF10;ECT2;NCEH1	TNFSF10	NLGN1 [nearest(5UTR) / Pan-related <PAN_ABC (PAN_Nasser)> / Non_PAN_ABC (Adp; LIV; MuSc; ADR; Brain; Co)] / TNFSF10 [Very-Strongly-Pan-related <PAN_ABC (beta; alpha)> / Non_PAN_ABC (LIV; Brain; Co)] / ECT2 [Non_PAN_ABC (LIV; Brain; Co)] / NCEH1 [Non_PAN_ABC (LIV; Brain; Co)]
TA-meta-98	3:180549318 - 3:180649318	Cross	3:180599318:C:T	rs13096210	Primary	FXR1	intronic	0.89	3	0	0.617	++	0.1	0.046	0.007	1.16e-09	0.111	0.049	0.01	8.43e-07	0.086	0.041	0.012	0.000336	FXR1;ATP11B;CCDC39;DNAJC19;LOC101928882	FXR1	FXR1 [nearest(intronic) / Very-Strongly-Pan-related <PAN_ABC (beta; alpha; acinar; ductal; PAN_Nasser)> / Non_PAN_ABC (Adp; LIV; MuSc; THY; ADR; Brain; SI; Co)] / ATP11B [Strongly-Pan-related <PAN_ABC (acinar; ductal)> / Non_PAN_ABC (MuSc)] / CCDC39 [Very-Strongly-Pan-related <PAN_ABC (beta; alpha; acinar; ductal; PAN_Nasser)> / Non_PAN_ABC (Adp; LIV; MuSc; THY; ADR; Brain; Co)] / DNAJC19 [Very-S…
TA-meta-99	3:185455984 - 3:185555984	Cross/EAS/EUR	3:185505984:G:A	rs9841201	Primary	IGF2BP2	intronic	0.87	10	0	0.349	++	0.309	0.113	0.005	8.55e-128	0.303	0.117	0.006	1.57e-72	0.316	0.108	0.007	4.06e-57	IGF2BP2;C3orf65;SENP2	IGF2BP2	IGF2BP2 [nearest(intronic) / Pan-related <PAN_ABC (ductal; PAN_Nasser)> / Non_PAN_SMR <Pos_Exp (THY)>] / C3orf65 [Pan-related <PAN_ABC (PAN_Nasser)>] / SENP2 [Non_PAN_SMR <Pos_Exp (Brain; Blood)>]
TA-meta-100	3:185455984 - 3:185555984	Cross/EAS/EUR	3:185833759:C:A	rs7635103	Secondary	DGKG	intronic	NA	NA	38.4	0.203	++	0.571	0.023	0.005	1.43e-06	0.442	0.018	0.006	0.00366	0.759	0.03	0.007	5.52e-05	DGKG;ETV5;RTP4;SST;TRA2B	RTP4	DGKG [nearest(intronic) / Pan-related <PAN_ABC (PAN_Nasser)> / Non_PAN_ABC (LIV; MuSc; THY; ADR; Brain)] / ETV5 [Very-Strongly-Pan-related <PAN_ABC (beta; PAN_Nasser)> / Non_PAN_ABC (Adp; LIV; MuSc; THY; ADR; Brain; SI; Co)] / RTP4 [Very-Strongly-Pan-related <PAN_ABC (beta; acinar; ductal; PAN_Nasser)> / Non_PAN_ABC (ADR)] / SST [Strongly-Pan-related <PAN_ABC (alpha; acinar; ductal)> / Non_PAN_AB…
TA-meta-101	3:186615645 - 3:186715645	Cross/EAS/EUR	3:186665645:C:T	rs3887925	Primary	ST6GAL1	intronic	1	1	77.1	0.0365	++	0.498	0.044	0.004	2.28e-23	0.458	0.035	0.006	4.09e-09	0.545	0.054	0.006	1.01e-16	ST6GAL1	ST6GAL1	ST6GAL1 [nearest(intronic) / Non_PAN_SMR <Pos_Exp (Blood)>]
TA-meta-102	3:186615645 - 3:186715645	Cross/EAS/EUR	3:186675277:G:A	rs7645517	Secondary	ST6GAL1	intronic	NA	NA	27.6	0.24	++	0.064	0.036	0.009	8.79e-05	0.068	0.026	0.012	0.0259	0.057	0.048	0.014	0.000607	ST6GAL1	ST6GAL1	ST6GAL1 [nearest(intronic) / Non_PAN_SMR <Pos_Exp (Blood)>]
TA-meta-103	3:187690523 - 3:187790523	Cross/EAS/EUR	3:187740523:C:T	rs6808574	Primary	LPP(-130.5kb)	intergenic	0.33	3	0.4	0.316	--	0.384	-0.06	0.007	4e-20	0.005	-0.002	0.059	0.977	0.388	-0.061	0.007	2.29e-20	LPP	LPP	LPP [nearest(intergenic)]
TA-meta-104	3:187690523 - 3:187790523	Cross/EAS/EUR	3:187705040:G:A	rs13086642	Secondary	LPP(-166kb)	intergenic	NA	NA	0	0.499	--	0.151	-0.046	0.007	9.13e-12	0.181	-0.048	0.008	7.02e-10	0.065	-0.038	0.013	0.0036	LPP;RP11-132N15.3;BCL6;LPP-AS2;RTP4	LPP	LPP [nearest(intergenic) / Non_PAN_ABC (LIV)] / RP11-132N15.3 [Pan-related <PAN_ABC (PAN_Nasser)> / Non_PAN_ABC (MuSc; Brain)] / BCL6 [Non_PAN_ABC (LIV)] / LPP-AS2 [Non_PAN_ABC (LIV)] / RTP4 [Non_PAN_ABC (LIV)]
TA-meta-105	3:195781237 - 3:195881237	Cross/EAS	3:195831237:C:T	rs9872347	Primary	TFRC(+22.2kb)	intergenic	0.23	14	0	0.795	--	0.316	-0.035	0.005	4.24e-13	0.302	-0.034	0.007	8.66e-07	0.329	-0.036	0.007	1.13e-07	SDHAP1;TFRC	SDHAP1	SDHAP1 [Strongly-Pan-related <PAN_ABC (acinar)> / Non_PAN_ABC (Adp; LIV; MuSc; ADR); Non_PAN_SMR <Neg_Exp (Brain)>] / TFRC [nearest(intergenic) / Non_PAN_ABC (Adp; LIV; ADR)]
TA-meta-106	4:1196038 - 4:1296038	Cross/EAS	4:1246038:A:T	rs72501962	Primary	CTBP1	upstream	0.24	4	0	0.417	++	0.282	-0.088	0.006	1.04e-46	0.32	-0.09	0.007	9.37e-43	0.041	-0.076	0.017	5.76e-06	CTBP1;CTBP1-AS2;MAEA;SPON2;UVSSA	CTBP1	CTBP1 [nearest(upstream) / Very-Strongly-Pan-related <PAN_ABC (beta; acinar; PAN_Nasser)> / Non_PAN_ABC (LIV; Brain; Co)] / CTBP1-AS2 [Very-Strongly-Pan-related <PAN_ABC (beta; acinar; PAN_Nasser) / PAN-SMR (Pos_Exp)> / Non_PAN_ABC (LIV; Brain; Co); Non_PAN_SMR <Pos_Exp (Adp-Sub; Adp-Vis; LIV; THY; ADR; SI; Co; Blood)>] / MAEA [Strongly-Pan-related <PAN_ABC (PAN_Nasser) / PAN-SMR (Neg_Exp)> / Non…
TA-meta-107	4:1196038 - 4:1296038	Cross/EAS	4:1413421:A:T	rs62286764	Secondary	NKX1-1(+13.3kb)	intergenic	NA	NA	95.3	4.26e-06	--	0.546	0.041	0.005	1.57e-15	0.353	0.065	0.007	3.34e-19	0.745	0.017	0.007	0.0207	CTBP1-AS2;MAEA;AC078852.1;FAM53A;NKX1-1	CTBP1-AS2	CTBP1-AS2 [Pan-related <PAN-SMR (Pos_Exp)> / Non_PAN_SMR <Pos_Exp (Adp-Sub; Adp-Vis; LIV; THY; ADR; SI; Co; Blood)>] / MAEA [Pan-related <PAN-SMR (Neg_Exp)> / Non_PAN_SMR <Neg_Exp (MuSc)>] / AC078852.1 [Non_PAN_SMR <Neg_Exp (THY)>] / FAM53A [Non_PAN_SMR <Pos_Exp (Blood) / Neg_Exp (Adp-Sub; MuSc; THY)>] / NKX1-1 [nearest(intergenic)]
TA-meta-108	4:1196038 - 4:1296038	Cross/EAS	4:1784403:T:C	rs56337234	Secondary	FGFR3(-10.6kb)	intergenic	NA	NA	7.3	0.299	--	0.405	0.059	0.005	1.89e-33	0.283	0.065	0.007	2.04e-18	0.502	0.055	0.007	9.75e-17	FGFR3;FAM53A	FGFR3	FGFR3 [nearest(intergenic) / Non_PAN_ABC (LIV)] / FAM53A [Non_PAN_SMR <Pos_Exp (Blood) / Neg_Exp (Adp-Sub; MuSc; THY)>]
TA-meta-109	4:1196038 - 4:1296038	Cross/EAS	4:1288481:T:G	rs79680136	Secondary	MAEA	intronic	NA	NA	0	0.564	++	0.358	-0.077	0.006	2.54e-37	0.388	-0.078	0.006	3.3e-35	0.027	-0.066	0.021	0.00158	CTBP1-AS2;MAEA;CTBP1;UVSSA;SPON2	MAEA	CTBP1-AS2 [Very-Strongly-Pan-related <PAN_ABC (beta; alpha; acinar; ductal; PAN_Nasser) / PAN-SMR (Pos_Exp)> / Non_PAN_ABC (Adp; LIV; MuSc; THY; Brain; SI; Co); Non_PAN_SMR <Pos_Exp (Adp-Sub; Adp-Vis; LIV; THY; ADR; SI; Co; Blood)>] / MAEA [nearest(intronic) / Very-Strongly-Pan-related <PAN_ABC (alpha; acinar; ductal; PAN_Nasser) / PAN-SMR (Neg_Exp)> / Non_PAN_ABC (Adp; LIV; MuSc; THY; ADR; Brain…
TA-meta-110	4:1196038 - 4:1296038	Cross/EAS	4:790263:G:A	rs28587502	Secondary	CPLX1	intronic	NA	NA	0	0.564	++	0.048	0.061	0.011	4.58e-08	0.03	0.052	0.018	0.00415	0.058	0.066	0.014	2.83e-06	CPLX1;ATP5I;GAK;LOC100129917;PCGF3	CPLX1	CPLX1 [nearest(intronic) / Very-Strongly-Pan-related <PAN_ABC (beta; alpha)> / Non_PAN_ABC (LIV; MuSc; Brain)] / ATP5I [Very-Strongly-Pan-related <PAN_ABC (beta; alpha; acinar; ductal; PAN_Nasser)> / Non_PAN_ABC (Adp; LIV; MuSc; THY; ADR; Brain; SI; Co)] / GAK [Strongly-Pan-related <PAN_ABC (alpha; acinar; ductal; PAN_Nasser)> / Non_PAN_ABC (Adp; LIV; MuSc; THY; ADR; Brain; SI; Co)] / LOC10012991…
TA-meta-111	4:3191845 - 4:3291845	Cross/EUR	4:3241845:C:T	rs362307	Primary	HTT	3UTR	0.97	1	NA	NA	?+	0.078	0.07	0.012	5.95e-09	NA	NA	NA	NA	0.078	0.07	0.012	6.78e-09	HTT;DOK7;MSANTD1	HTT	HTT [nearest(3UTR)] / DOK7 [Pan-related <PAN_ABC (PAN_Nasser)> / Non_PAN_ABC (Brain)] / MSANTD1 [Non_PAN_ABC (Brain)]
TA-meta-112	4:6245322 - 4:6345322	Cross/EAS/EUR	4:6295322:G:C	rs10937719	Primary	WFS1	intronic	0.45	4	14.3	0.28	--	0.344	-0.087	0.006	1.85e-46	0.045	-0.103	0.016	1.18e-10	0.395	-0.085	0.007	1.18e-37	WFS1;JAKMIP1;LOC285484;MAN2B2;MRFAP1	WFS1	WFS1 [nearest(intronic) / rs1046314 [VEP_Medium: R2 (EAS:EUR=0.92:0.86)] / Very-Strongly-Pan-related <PAN_ABC (beta; alpha; acinar; ductal; PAN_Nasser)> / Non_PAN_ABC (Adp; LIV; MuSc; THY; ADR; Brain; SI; Co); Non_PAN_SMR <Pos_Exp (Adp-Sub; Adp-Vis; MuSc; THY; ADR) / Neg_Exp (Brain)>] / JAKMIP1 [Very-Strongly-Pan-related <PAN_ABC (beta; alpha)> / Non_PAN_ABC (LIV)] / LOC285484 [Very-Strongly-Pan-…
TA-meta-113	4:17993209 - 4:18093209	Cross/EUR	4:18043209:G:A	rs34027353	Primary	LCORL(+19.7kb)	intergenic	0.04	62	0	0.373	++	0.526	0.031	0.005	9.44e-12	0.405	0.028	0.006	1.05e-05	0.672	0.036	0.007	1.56e-07	DCAF16;LCORL	LCORL	DCAF16 [Non_PAN_SMR <Pos_Exp (Adp-Vis; THY) / Neg_Exp (Brain; Blood)>] / LCORL [nearest(intergenic)]
TA-meta-114	4:45125691 - 4:45225691	Cross/EAS/EUR	4:45175691:C:T	rs13130484	Primary	GNPDA2(+447.1kb)	intergenic	0.48	6	0	0.966	++	0.358	0.043	0.005	3.31e-20	0.288	0.043	0.007	6.05e-11	0.43	0.044	0.007	8.49e-11	GNPDA2	GNPDA2	GNPDA2 [nearest(intergenic)]
TA-meta-115	4:49043197 - 4:49143197	Cross	4:49093197:G:T	rs12503138	Primary	CWH43(+29.1kb)	intergenic	0.1	61	19.4	0.265	--	0.548	-0.027	0.005	2.61e-08	0.404	-0.022	0.007	0.00096	0.715	-0.033	0.007	4.37e-06	CWH43	CWH43	CWH43 [nearest(intergenic) / rs1051447 [VEP_Medium: R2 (EAS:EUR=0.98:0.95)] / Non_PAN_ABC (Co)]
TA-meta-116	4:52768664 - 4:52868664	Cross	4:52818664:G:A	rs2102278	Primary	DCUN1D4(+35.7kb)	intergenic	0.24	82	66.7	0.0829	--	0.529	-0.027	0.005	6.8e-09	0.401	-0.02	0.006	0.00182	0.682	-0.036	0.007	2.21e-07	SGCB;DCUN1D4;FIP1L1;LNX1;SCFD2	SGCB	SGCB [Very-Strongly-Pan-related <PAN_ABC (beta; alpha; acinar; ductal; PAN_Nasser)> / Non_PAN_ABC (Adp; LIV; MuSc; THY; ADR; Brain; SI; Co); Non_PAN_SMR <Pos_Exp (Brain; Blood)>] / DCUN1D4 [nearest(intergenic) / Pan-related <PAN_ABC (PAN_Nasser)> / Non_PAN_ABC (Adp; LIV; MuSc; THY; ADR; Brain; SI; Co); Non_PAN_SMR <Pos_Exp (THY)>] / FIP1L1 [Very-Strongly-Pan-related <PAN_ABC (beta; alpha; acinar;…
TA-meta-117	4:71804281 - 4:71904281	Cross/EAS	4:71854281:G:A	rs12499651	Primary	MOB1B	intronic	0.12	30	0	0.512	++	0.177	0.064	0.007	5.78e-21	0.206	0.066	0.007	2.13e-18	0.042	0.054	0.016	0.00082	DCK;MOB1B;GC;GRSF1;UTP3	MOB1B	DCK [Very-Strongly-Pan-related <PAN_ABC (beta; alpha)> / Non_PAN_ABC (MuSc; ADR; Brain); Non_PAN_SMR <Pos_Exp (THY; Brain; Blood)>] / MOB1B [nearest(intronic) / Very-Strongly-Pan-related <PAN_ABC (beta; alpha; PAN_Nasser)> / Non_PAN_ABC (LIV; MuSc; ADR; Brain; Co); Non_PAN_SMR <Pos_Exp (Blood)>] / GC [Very-Strongly-Pan-related <PAN_ABC (beta)>] / GRSF1 [Very-Strongly-Pan-related <PAN_ABC (beta; a…
TA-meta-118	4:83528271 - 4:83628271	Cross/EUR	4:83578271:G:A	rs12642790	Primary	SCD5	intronic	0.28	9	76.4	0.0394	++	0.365	0.029	0.005	2.57e-10	0.387	0.02	0.006	0.00118	0.338	0.039	0.007	6.43e-09	SCD5;TMEM150C;LINC00575	SCD5	SCD5 [nearest(intronic) / rs3733227 [VEP_Low: R2 (EAS:EUR=1:1)] / Very-Strongly-Pan-related <PAN_ABC (beta)> / Non_PAN_SMR <Pos_Exp (Brain)>] / TMEM150C [Very-Strongly-Pan-related <PAN_ABC (beta)>] / LINC00575 [Non_PAN_ABC (Brain)]
TA-meta-119	4:85289618 - 4:85389618	Cross/EAS	4:85339618:T:C	rs117624659	Primary	NKX6-1(-73.5kb)	intergenic	0.99	1	0	0.508	++	0.026	-0.209	0.022	1.19e-21	0.023	-0.204	0.023	2.2e-18	0.046	-0.248	0.063	8.51e-05	NKX6-1	NKX6-1	NKX6-1 [nearest(intergenic)]
TA-meta-120	4:85289618 - 4:85389618	Cross/EAS	4:85356507:T:A	rs4693109	Secondary	NKX6-1(-56.6kb)	intergenic	NA	NA	51.5	0.151	++	0.012	0.118	0.021	1.43e-08	0.013	0.091	0.028	0.00111	0.011	0.152	0.031	1.2e-06	NKX6-1	NKX6-1	NKX6-1 [nearest(intergenic)]
TA-meta-121	4:96087512 - 4:96187512	Cross	4:96137512:T:C	rs995062	Primary	UNC5C	intronic	0.68	13	0	0.321	++	0.465	-0.026	0.005	2.08e-08	0.309	-0.022	0.006	0.000745	0.641	-0.032	0.007	5.15e-06	UNC5C	UNC5C	UNC5C [nearest(intronic)]
TA-meta-122	4:102117710 - 4:102217710	Cross	4:102167710:A:G	rs3804409	Primary	PPP3CA	intronic	0.04	74	0	0.933	++	0.533	-0.028	0.005	1.1e-09	0.384	-0.028	0.006	4.61e-06	0.746	-0.029	0.007	7.6e-05	PPP3CA	PPP3CA	PPP3CA [nearest(intronic)]
TA-meta-123	4:105998291 - 4:106098291	Cross	4:106048291:T:C	rs17035289	Primary	TET2(-18.7kb)	intergenic	0.45	3	0	0.625	--	0.182	0.038	0.006	2.38e-11	0.19	0.036	0.008	3.34e-06	0.172	0.041	0.009	1.19e-06	TET2;PPA2;AIMP1;TACR3;TBCK	TET2	TET2 [nearest(intergenic) / Pan-related <PAN_ABC (PAN_Nasser)> / Non_PAN_ABC (Adp; LIV; MuSc; THY; ADR; Brain; SI; Co); Non_PAN_SMR <Pos_Exp (Blood)>] / PPA2 [Pan-related <PAN_ABC (PAN_Nasser)> / Non_PAN_ABC (Adp; LIV; MuSc; ADR; Brain)] / AIMP1 [Non_PAN_ABC (Adp; Brain)] / TACR3 [Non_PAN_ABC (Brain)] / TBCK [Non_PAN_ABC (Adp; Brain)]
TA-meta-124	4:121703471 - 4:121803471	Cross/EAS	4:121753471:A:C	rs115991652	Primary	PRDM5	intronic	0.05	112	78.4	0.0314	--	0.259	0.029	0.005	7e-09	0.24	0.039	0.007	1.97e-08	0.279	0.018	0.007	0.0129	PRDM5	PRDM5	PRDM5 [nearest(intronic)]
TA-meta-125	4:128943780 - 4:129043780	Cross	4:128993780:C:T	rs4834227	Primary	LARP1B	intronic	0.27	14	0	0.854	++	0.188	0.031	0.006	3.09e-08	0.144	0.03	0.009	0.000383	0.224	0.032	0.008	2.38e-05	LARP1B;C4orf29;MFSD8	LARP1B	LARP1B [nearest(intronic) / Pan-related <PAN_ABC (PAN_Nasser)>] / C4orf29 [Pan-related <PAN_ABC (PAN_Nasser)> / Non_PAN_ABC (LIV)] / MFSD8 [Pan-related <PAN_ABC (PAN_Nasser)> / Non_PAN_ABC (LIV)]
TA-meta-126	4:130789466 - 4:130889466	Cross	4:130839466:A:G	rs2968947	Primary	C4orf33(+801.7kb)	intergenic	0.36	6	20.3	0.263	++	0.528	-0.025	0.005	2.9e-08	0.416	-0.03	0.006	8.45e-07	0.675	-0.02	0.007	0.00521	C4orf33	C4orf33	C4orf33 [nearest(intergenic)]
TA-meta-127	4:153470475 - 4:153570475	Cross/EAS/EUR	4:153520475:C:T	rs6813195	Primary	TMEM154(-19.3kb)	intergenic	0.98	1	26.1	0.245	--	0.404	-0.065	0.005	8.4e-45	0.49	-0.069	0.006	9.32e-31	0.28	-0.058	0.007	7.04e-16	FBXW7;MIR4453;TMEM154	TMEM154	FBXW7 [Non_PAN_SMR <Neg_Exp (Blood)>] / MIR4453 [Non_PAN_SMR <Neg_Exp (Blood)>] / TMEM154 [nearest(intergenic)]
TA-meta-128	4:185663608 - 4:185763608	Cross/EUR	4:185713608:G:A	rs72695645	Primary	ACSL1	intronic	0.03	39	NA	NA	?-	0.142	-0.069	0.009	5.87e-14	NA	NA	NA	NA	0.142	-0.069	0.009	6.4e-14	ACSL1;CENPU;CLDN22;LINC01093;RP11-701P16.1	ACSL1	ACSL1 [nearest(intronic) / Very-Strongly-Pan-related <PAN_ABC (beta; PAN_Nasser)> / Non_PAN_ABC (Adp; LIV; MuSc; THY; ADR; Brain; Co)] / CENPU [Non_PAN_ABC (Adp; MuSc; Co)] / CLDN22 [Non_PAN_ABC (Adp)] / LINC01093 [Non_PAN_ABC (MuSc)] / RP11-701P16.1 [Non_PAN_ABC (Adp; MuSc)]
TA-meta-129	5:14718092 - 5:14818092	Cross/EAS/EUR	5:14768092:C:G	rs6885132	Primary	ANKH	intronic	1	1	86.4	0.00671	++	0.36	-0.051	0.005	1.36e-21	0.441	-0.043	0.006	2.85e-12	0.096	-0.077	0.011	2.49e-12	ANKH	ANKH	ANKH [nearest(intronic) / Non_PAN_ABC (LIV)]
TA-meta-130	5:36210195 - 5:36310195	Cross/EAS	5:36260195:C:T	rs74293505	Primary	RANBP3L	intronic	0.24	90	0	0.821	++	0.162	0.052	0.009	3.97e-09	0.162	0.052	0.009	3.51e-09	0.001	0.022	0.135	0.872	RANBP3L;LMBRD2;NADK2;SKP2	RANBP3L	RANBP3L [nearest(intronic)] / LMBRD2 [Non_PAN_ABC (LIV)] / NADK2 [Non_PAN_ABC (LIV; Brain)] / SKP2 [Non_PAN_ABC (LIV)]
TA-meta-131	5:44637188 - 5:44737188	Cross/EUR	5:44687188:T:C	rs4571480	Primary	MRPS30(-121.8kb)	intergenic	0.13	14	83.8	0.0129	++	0.548	-0.028	0.004	2.4e-10	0.5	-0.018	0.006	0.00317	0.605	-0.04	0.006	8.73e-10	MRPS30;BRCAT54;NNT;NNT-AS1;PAIP1	MRPS30	MRPS30 [nearest(intergenic) / Very-Strongly-Pan-related <PAN_ABC (beta; alpha)> / Non_PAN_ABC (MuSc; ADR; Brain; SI)] / BRCAT54 [Very-Strongly-Pan-related <PAN_ABC (beta; alpha)>] / NNT [Non_PAN_ABC (ADR; SI)] / NNT-AS1 [Non_PAN_ABC (ADR; SI)] / PAIP1 [Non_PAN_ABC (ADR; SI)]
TA-meta-132	5:46123755 - 5:46223755	Cross	5:46173755:C:T	rs8185073	Primary	HCN1(+477.5kb)	intergenic	0.24	10	0	0.337	--	0.417	-0.028	0.005	1.91e-09	0.418	-0.033	0.007	7.12e-07	0.415	-0.024	0.007	0.000362	HCN1	HCN1	HCN1 [nearest(intergenic)]
TA-meta-133	5:49586753 - 5:49686753	Cross/EAS	5:49636753:G:T	rs10940235	Primary	EMB(-55.3kb)	intergenic	0.48	2	0	0.352	--	0.455	-0.026	0.004	3.14e-09	0.43	-0.03	0.006	8.06e-07	0.483	-0.022	0.006	0.00054	EMB	EMB	EMB [nearest(intergenic)]
TA-meta-134	5:51741225 - 5:51841225	Cross/EAS/EUR	5:51791225:T:C	rs17261179	Primary	ITGA1(-292.5kb)	intergenic	0.62	6	0	0.656	++	0.419	-0.034	0.004	9.02e-14	0.356	-0.032	0.006	6.63e-07	0.485	-0.035	0.006	2.72e-08	AC022126.1;ITGA1	ITGA1	AC022126.1 [Non_PAN_SMR <Pos_Exp (Brain)>] / ITGA1 [nearest(intergenic)]
TA-meta-135	5:51741225 - 5:51841225	Cross/EAS/EUR	5:52073844:A:G	rs2548496	Secondary	ITGA1(-9.9kb)	intergenic	NA	NA	0	0.36	--	0.272	0.037	0.005	3.78e-13	0.312	0.033	0.006	3.05e-07	0.209	0.043	0.008	1.26e-07	PELO;ITGA1;ISL1;LOC642366;PARP8	PELO	PELO [rs2270756 [VEP_Medium: R2 (EAS:EUR=1:1)] / Very-Strongly-Pan-related <PAN_ABC (beta; alpha; acinar; ductal; PAN_Nasser)> / Non_PAN_ABC (Adp; LIV; MuSc; THY; ADR; Brain; SI; Co); Non_PAN_SMR <Pos_Exp (Blood)>] / ITGA1 [nearest(intergenic) / Pan-related <PAN_ABC (PAN_Nasser)> / Non_PAN_ABC (Adp; LIV; MuSc; THY; ADR; Brain; SI; Co); Non_PAN_SMR <Pos_Exp (Blood)>] / ISL1 [Non_PAN_ABC (Adp; MuSc…
TA-meta-136	5:53221420 - 5:53321420	Cross/EUR	5:53271420:A:G	rs702634	Primary	ARL15	intronic	0.77	3	0	0.586	++	0.247	-0.048	0.005	5.12e-19	0.147	-0.044	0.009	2.76e-07	0.311	-0.05	0.007	3.36e-13	ARL15	ARL15	ARL15 [nearest(intronic)]
TA-meta-137	5:55759138 - 5:55859138	Cross/EAS/EUR	5:55809138:C:A	rs256903	Primary	ANKRD55(+280kb)	intergenic	0.74	6	0	0.564	++	0.591	0.071	0.005	1.72e-52	0.497	0.069	0.006	7.6e-31	0.743	0.074	0.007	8.41e-23	AC022431.2;ANKRD55;CTC-236F12.4;LINC01948;MAP3K1	ANKRD55	AC022431.2 [Non_PAN_ABC (Adp; SI)] / ANKRD55 [nearest(intergenic)] / CTC-236F12.4 [Non_PAN_ABC (Adp; SI)] / LINC01948 [Non_PAN_SMR <Pos_Exp (Brain)>] / MAP3K1 [Non_PAN_ABC (Adp; SI)]
TA-meta-138	5:55759138 - 5:55859138	Cross/EAS/EUR	5:55861894:G:A	rs9687846	Secondary	MAP3K1(-249.5kb)	intergenic	NA	NA	58.4	0.121	++	0.155	0.062	0.006	1.87e-23	0.104	0.051	0.01	1.89e-07	0.19	0.07	0.008	3.47e-18	AC022431.2;LINC01948;MAP3K1	MAP3K1	AC022431.2 [Non_PAN_ABC (Adp)] / LINC01948 [Non_PAN_SMR <Pos_Exp (Brain)>] / MAP3K1 [nearest(intergenic)]
TA-meta-139	5:55759138 - 5:55859138	Cross/EAS/EUR	5:55840633:G:A	rs42251	Secondary	MAP3K1(-270.8kb)	intergenic	NA	NA	66.5	0.0841	-+	0.336	-0.005	0.005	0.26	0.364	-0.013	0.006	0.0457	0.304	0.004	0.007	0.618	LINC01948;MAP3K1	MAP3K1	LINC01948 [Non_PAN_SMR <Pos_Exp (Brain)>] / MAP3K1 [nearest(intergenic)]
TA-meta-140	5:67664246 - 5:67764246	Cross/EAS	5:67714246:A:G	rs4976033	Primary	PIK3R1(+116.6kb)	intergenic	0.98	1	0	0.643	--	0.442	0.034	0.004	1.1e-13	0.468	0.032	0.006	3.13e-07	0.412	0.036	0.007	5.72e-08	PIK3R1;GTF2H2C;MAST4;MAST4-AS1;SLC30A5	PIK3R1	PIK3R1 [nearest(intergenic) / Non_PAN_ABC (Brain)] / GTF2H2C [Non_PAN_ABC (Brain)] / MAST4 [Non_PAN_ABC (Brain)] / MAST4-AS1 [Non_PAN_ABC (Brain)] / SLC30A5 [Non_PAN_ABC (Brain)]
TA-meta-141	5:74876778 - 5:74976778	Cross/EAS/EUR	5:74926778:G:A	rs253407	Primary	ANKDD1B	intronic	0.84	5	25.8	0.245	--	0.315	-0.04	0.005	8.42e-17	0.347	-0.035	0.006	5.47e-08	0.276	-0.046	0.007	1.37e-10	ANKDD1B;POC5;POLK;COL4A3BP;HMGCR	ANKDD1B	ANKDD1B [nearest(intronic) / Non_PAN_ABC (Adp; Brain; SI; Co); Non_PAN_SMR <Neg_Exp (THY)>] / POC5 [Pan-related <PAN-SMR (Neg_Exp)> / Non_PAN_ABC (Adp); Non_PAN_SMR <Pos_Exp (MuSc) / Neg_Exp (Adp-Sub; Adp-Vis; THY; SI; Co; Blood)>] / POLK [Strongly-Pan-related <PAN_ABC (PAN_Nasser) / PAN-SMR (Neg_Exp)> / Non_PAN_ABC (Adp; LIV; MuSc; THY; ADR); Non_PAN_SMR <Neg_Exp (Brain)>] / COL4A3BP [Pan-relate…
TA-meta-142	5:76377311 - 5:76477311	Cross/EUR	5:76427311:A:G	rs6878122	Primary	ZBED3(+44.2kb)	intergenic	0.39	5	0	0.826	--	0.262	0.061	0.006	3.24e-21	0.038	0.064	0.017	0.000124	0.301	0.06	0.007	6.45e-18	ZBED3;ZBED3-AS1	ZBED3	ZBED3 [nearest(intergenic) / Non_PAN_ABC (Adp)] / ZBED3-AS1 [Non_PAN_ABC (Adp)]
TA-meta-143	5:78482658 - 5:78582658	Cross/EUR	5:78532658:C:T	rs3733893	Primary	JMY	exonic	0.09	25	40.3	0.196	--	0.363	-0.035	0.005	3.49e-14	0.37	-0.029	0.006	3.03e-06	0.355	-0.041	0.007	8.6e-10	JMY;AP3B1;CTD-2201I18.1;MTX3;PAPD4	JMY	JMY [nearest(exonic) / rs3733893 [VEP_Medium: R2 (EAS:EUR=1:1)] / Very-Strongly-Pan-related <PAN_ABC (beta; alpha; PAN_Nasser)> / Non_PAN_ABC (Adp; LIV; MuSc; THY; ADR; Brain; SI; Co); Non_PAN_SMR <Neg_Exp (Blood)>] / AP3B1 [Very-Strongly-Pan-related <PAN_ABC (beta; PAN_Nasser)> / Non_PAN_ABC (MuSc; Brain; Co)] / CTD-2201I18.1 [Very-Strongly-Pan-related <PAN_ABC (beta; alpha; acinar; ductal; PAN_…
TA-meta-144	5:87920352 - 5:88020352	Cross/EAS	5:87970352:G:C	rs112862634	Primary	MEF2C(-43.6kb)	intergenic	0.26	13	0	0.754	++	0.386	0.035	0.005	6.71e-12	0.49	0.034	0.006	2.35e-08	0.131	0.037	0.009	7.89e-05	LINC00461;TMEM161B;TMEM161B-AS1;CCNH;MEF2C	LINC00461	LINC00461 [Non_PAN_ABC (Brain); Non_PAN_SMR <Pos_Exp (Brain)>] / TMEM161B [Pan-related <PAN_ABC (PAN_Nasser)> / Non_PAN_ABC (Adp; LIV; ADR; Brain)] / TMEM161B-AS1 [Pan-related <PAN_ABC (PAN_Nasser)> / Non_PAN_ABC (Adp; LIV; ADR; Brain)] / CCNH [Non_PAN_ABC (LIV; ADR; Brain)] / MEF2C [nearest(intergenic)]
TA-meta-145	5:95800250 - 5:95900250	Cross/EAS	5:95850250:A:C	rs261967	Primary	CAST(-10.7kb)	intergenic	0.33	21	84.4	0.0113	--	0.416	0.026	0.004	2.46e-09	0.412	0.037	0.006	1.13e-09	0.421	0.014	0.006	0.0287	CAST	CAST	CAST [nearest(intergenic)]
TA-meta-146	5:102372968 - 5:102472968	Cross/EUR	5:102422968:C:T	rs115505614	Primary	GIN1	3UTR	0.43	3	NA	NA	?+	0.05	0.166	0.015	9.94e-29	NA	NA	NA	NA	0.05	0.166	0.015	7.58e-29	GIN1;PAM;PPIP5K2;C5orf30;EIF3KP1	GIN1	GIN1 [nearest(3UTR) / Non_PAN_SMR <Pos_Exp (Brain)>] / PAM [rs35658696 [VEP_Medium: R2 (EAS:EUR=ND:0.97)] / Non_PAN_SMR <Pos_Exp (Brain; Blood)>] / PPIP5K2 [rs36046591 [VEP_Low: R2 (EAS:EUR=ND:0.97)] / Non_PAN_SMR <Pos_Exp (ADR; Brain; PIT; Blood)>] / C5orf30 [Non_PAN_SMR <Pos_Exp (Blood)>] / EIF3KP1 [Non_PAN_SMR <Pos_Exp (Adp-Sub; Adp-Vis; MuSc; ADR; Brain; PIT) / Both_Exp (Co)>]
TA-meta-147	5:102372968 - 5:102472968	Cross/EUR	5:102338739:G:C	rs78408340	Secondary	PAM	5UTR	NA	NA	NA	NA	?-	0.992	-0.379	0.039	2.08e-22	NA	NA	NA	NA	0.992	-0.379	0.039	2.35e-22	PAM;C5orf30;EIF3KP1;GIN1;PPIP5K2	PAM	PAM [nearest(5UTR) / rs78408340 [VEP_Medium: R2 (EAS:EUR=1:1)] / Non_PAN_SMR <Pos_Exp (Brain; Blood)>] / C5orf30 [Non_PAN_SMR <Pos_Exp (Blood)>] / EIF3KP1 [Non_PAN_SMR <Pos_Exp (Adp-Sub; Adp-Vis; MuSc; ADR; Brain; PIT) / Both_Exp (Co)>] / GIN1 [Non_PAN_SMR <Pos_Exp (Brain)>] / PPIP5K2 [Non_PAN_SMR <Pos_Exp (ADR; Brain; PIT; Blood)>]
TA-meta-148	5:111367945 - 5:111467945	Cross	5:111417945:C:A	rs30347	Primary	EPB41L4A(-60.2kb)	intergenic	0.08	52	65.9	0.0868	--	0.537	-0.024	0.004	4.52e-08	0.441	-0.031	0.006	1.82e-07	0.657	-0.016	0.007	0.0176	EPB41L4A;EPB41L4A-AS1;NREP;STARD4;TSSK1B	EPB41L4A	EPB41L4A [nearest(intergenic)] / EPB41L4A-AS1 [Non_PAN_ABC (Adp)] / NREP [Non_PAN_ABC (Adp)] / STARD4 [Non_PAN_ABC (Adp)] / TSSK1B [Non_PAN_ABC (Adp)]
TA-meta-149	5:122632334 - 5:122732334	Cross/EAS	5:122682334:C:T	rs2303720	Primary	CEP120	3UTR	0.33	9	0	0.571	--	0.078	-0.069	0.009	3.71e-14	0.09	-0.066	0.011	3.32e-10	0.039	-0.078	0.019	2.59e-05	CEP120;CSNK1G3;PPIC;SNX24;SRFBP1	CEP120	CEP120 [nearest(3UTR) / rs2303720 [VEP_Medium: R2 (EAS:EUR=1:1)] / Pan-related <PAN_ABC (PAN_Nasser)> / Non_PAN_ABC (Adp; LIV; MuSc; THY; ADR; Brain; SI; Co)] / CSNK1G3 [Very-Strongly-Pan-related <PAN_ABC (beta; alpha; acinar; ductal; PAN_Nasser)> / Non_PAN_ABC (Adp; Co)] / PPIC [Very-Strongly-Pan-related <PAN_ABC (beta; acinar; ductal; PAN_Nasser)> / Non_PAN_ABC (Adp; LIV; MuSc; ADR; Brain; SI; …
TA-meta-150	5:127300549 - 5:127400549	Cross	5:127350549:C:T	rs3749748	Primary	SLC12A2(-68.9kb)	intergenic	0.15	20	0	0.329	--	0.296	-0.027	0.005	3.38e-08	0.342	-0.023	0.006	0.000345	0.231	-0.033	0.008	1.88e-05	CTC-228N24.3;SLC12A2;LINC01184	SLC12A2	CTC-228N24.3 [Pan-related <PAN-SMR (Neg_Exp)> / Non_PAN_SMR <Pos_Exp (Adp-Sub; LIV; MuSc) / Neg_Exp (Adp-Vis; Blood)>] / SLC12A2 [nearest(intergenic) / Non_PAN_SMR <Neg_Exp (Blood)>] / LINC01184 [Non_PAN_SMR <Neg_Exp (Brain)>]
TA-meta-151	5:133814599 - 5:133914599	Cross/EAS/EUR	5:133864599:G:A	rs329122	Primary	JADE2	intronic	0.32	3	0	0.894	++	0.407	0.037	0.004	1.06e-16	0.387	0.038	0.006	9.43e-10	0.429	0.037	0.006	1.72e-08	CAMLG;CDKN2AIPNL;JADE2;SAR1B;UBE2B	CDKN2AIPNL	CAMLG [Pan-related <PAN_ABC (alpha; PAN_Nasser)> / Non_PAN_ABC (LIV; MuSc; THY; ADR; Brain; Co); Non_PAN_SMR <Pos_Exp (Adp-Sub; MuSc; THY; Brain; PIT; Co; Blood)>] / CDKN2AIPNL [Very-Strongly-Pan-related <PAN_ABC (beta; alpha; PAN_Nasser)> / Non_PAN_ABC (Adp; LIV; MuSc; THY; ADR; Brain; SI; Co)] / JADE2 [nearest(intronic) / Pan-related <PAN_ABC (PAN_Nasser)> / Non_PAN_ABC (Adp; LIV; MuSc; THY; AD…
TA-meta-152	5:133814599 - 5:133914599	Cross/EAS/EUR	5:134252619:G:C	rs319592	Secondary	PCBD2	intronic	NA	NA	0	0.595	--	0.441	-0.027	0.004	9.18e-10	0.456	-0.025	0.006	4.66e-05	0.424	-0.029	0.006	3.86e-06	CAMLG;PCBD2;TXNDC15;C5orf24;C5orf66	PCBD2	CAMLG [Very-Strongly-Pan-related <PAN_ABC (beta; alpha; acinar; ductal; PAN_Nasser)> / Non_PAN_ABC (Adp; LIV; MuSc; ADR; Brain; SI; Co); Non_PAN_SMR <Pos_Exp (Adp-Sub; MuSc; THY; Brain; PIT; Co; Blood)>] / PCBD2 [nearest(intronic) / Strongly-Pan-related <PAN_ABC (alpha; acinar; ductal; PAN_Nasser)> / Non_PAN_ABC (Adp; LIV; MuSc; ADR; Brain; SI; Co); Non_PAN_SMR <Pos_Exp (THY)>] / TXNDC15 [Very-St…
TA-meta-153	5:151274259 - 5:151374259	Cross	5:151324259:G:C	rs302397	Primary	GLRA1(+19.9kb)	intergenic	0.96	1	0	0.448	++	0.327	0.028	0.005	2.25e-09	0.303	0.025	0.006	0.000136	0.354	0.032	0.007	3.4e-06	GLRA1	GLRA1	GLRA1 [nearest(intergenic) / Non_PAN_ABC (Brain)]
TA-meta-154	5:157972724 - 5:158072724	Cross	5:158022724:C:T	rs1650527	Primary	EBF1(-100.2kb)	intergenic	0.06	35	0	0.767	++	0.257	0.032	0.005	1.28e-10	0.28	0.031	0.007	3.52e-06	0.228	0.034	0.008	8.65e-06	EBF1	EBF1	EBF1 [nearest(intergenic)]
TA-meta-155	5:176676635 - 5:176776635	Cross/EAS	5:176726635:G:A	rs3088050	Primary	NSD1	3UTR	0.5	8	0	0.348	--	0.361	-0.034	0.005	7.07e-13	0.444	-0.038	0.006	3.63e-10	0.217	-0.028	0.008	0.000298	NSD1;PRELID1;RAB24;LMAN2;MXD3	NSD1	NSD1 [nearest(3UTR) / rs28580074 [VEP_Low: R2 (EAS:EUR=0.81:ND)] / Very-Strongly-Pan-related <PAN_ABC (beta; PAN_Nasser)> / Non_PAN_ABC (Adp; LIV; MuSc; SI)] / PRELID1 [Very-Strongly-Pan-related <PAN_ABC (beta; alpha; acinar; ductal; PAN_Nasser)> / Non_PAN_ABC (Adp; LIV; MuSc; THY; ADR; Brain; SI; Co); Non_PAN_SMR <Pos_Exp (Blood) / Neg_Exp (THY)>] / RAB24 [Very-Strongly-Pan-related <PAN_ABC (bet…
TA-meta-156	5:180172999 - 5:180272999	Cross	5:180222999:C:T	rs72648855	Primary	MGAT1	intronic	0.27	48	0	0.97	--	0.199	-0.038	0.006	2.44e-09	0.25	-0.037	0.008	1.97e-06	0.106	-0.038	0.011	0.000351	MGAT1;HEIH;LINC00847;RACK1;ZFP62	MGAT1	MGAT1 [nearest(intronic) / Very-Strongly-Pan-related <PAN_ABC (beta; acinar; ductal; PAN_Nasser)> / Non_PAN_ABC (Adp; LIV; MuSc; THY; ADR; Brain; SI; Co); Non_PAN_SMR <Neg_Exp (Blood)>] / HEIH [Very-Strongly-Pan-related <PAN_ABC (beta; alpha; acinar; ductal)>] / LINC00847 [Very-Strongly-Pan-related <PAN_ABC (beta; alpha; ductal; PAN_Nasser)> / Non_PAN_ABC (Adp; LIV; MuSc; THY; ADR; Brain; SI; Co)…
TA-meta-157	6:7181843 - 6:7281843	Cross/EAS/EUR	6:7231843:G:A	rs9379084	Primary	RREB1	exonic	1	1	84.4	0.0114	--	0.161	-0.078	0.007	2.66e-32	0.193	-0.065	0.009	1.59e-14	0.112	-0.099	0.011	5.48e-21	RREB1	RREB1	RREB1 [nearest(exonic) / rs9379084 [VEP_Medium: R2 (EAS:EUR=1:1)]]
TA-meta-158	6:7181843 - 6:7281843	Cross/EAS/EUR	6:7255650:C:T	rs9505097	Secondary	RREB1(+3.4kb)	intergenic	NA	NA	0	0.955	--	0.164	-0.039	0.007	1.82e-08	0.052	-0.04	0.014	0.00432	0.202	-0.039	0.008	1.08e-06	CAGE1;RIOK1;RREB1;SNRNP48;SSR1	RREB1	CAGE1 [Non_PAN_ABC (MuSc)] / RIOK1 [Non_PAN_ABC (MuSc)] / RREB1 [nearest(intergenic)] / SNRNP48 [Non_PAN_ABC (MuSc)] / SSR1 [Non_PAN_ABC (MuSc)]
TA-meta-159	6:20636996 - 6:20736996	Cross/EAS/EUR	6:20686996:C:A	rs9368222	Primary	CDKAL1	intronic	1	1	94.7	1.53e-05	++	0.352	0.161	0.005	1.49e-271	0.41	0.178	0.006	5.89e-191	0.272	0.138	0.007	1.42e-83	CDKAL1	CDKAL1	CDKAL1 [nearest(intronic) / Non_PAN_SMR <Pos_Exp (Brain)>]
TA-meta-160	6:20636996 - 6:20736996	Cross/EAS/EUR	6:20322518:C:A	rs6456335	Secondary	E2F3(-79.9kb)	intergenic	NA	NA	0	0.415	--	0.572	-0.01	0.005	0.032	0.449	-0.013	0.006	0.0293	0.743	-0.006	0.007	0.445	CDKAL1;E2F3	E2F3	CDKAL1 [Non_PAN_ABC (SI)] / E2F3 [nearest(intergenic)]
TA-meta-161	6:38177353 - 6:38277353	Cross/EAS	6:38227353:A:C	rs28472716	Primary	BTBD9	intronic	0.88	114	0	0.71	++	0.407	-0.036	0.006	3.11e-08	0.409	-0.036	0.006	3.89e-08	0.008	-0.068	0.087	0.434	BTBD9	BTBD9	BTBD9 [nearest(intronic)]
TA-meta-162	6:38989140 - 6:39089140	Cross/EAS	6:39039140:A:G	rs9394574	Primary	GLP1R	intronic	0.33	11	NA	NA	+?	0.199	-0.08	0.008	2.64e-21	0.199	-0.08	0.008	1.63e-21	NA	NA	NA	NA	GLP1R;KCNK17	GLP1R	GLP1R [nearest(intronic)] / KCNK17 [Non_PAN_SMR <Pos_Exp (Adp-Sub; SI; Blood)>]
TA-meta-163	6:38989140 - 6:39089140	Cross/EAS	6:39284857:G:A	rs35099099	Secondary	KCNK16	intronic	NA	NA	89.5	0.00208	++	0.453	0.04	0.004	1.51e-19	0.416	0.053	0.006	4.99e-18	0.492	0.026	0.006	4.3e-05	KCNK16;KCNK17	KCNK16	KCNK16 [nearest(intronic) / rs11756091 [VEP_Medium: R2 (EAS:EUR=1:0.99)] / Very-Strongly-Pan-related <PAN_ABC (beta; alpha)>] / KCNK17 [rs10947804 [VEP_Low: R2 (EAS:EUR=0.99:0.98)] / Very-Strongly-Pan-related <PAN_ABC (beta; alpha)> / Non_PAN_ABC (LIV; THY); Non_PAN_SMR <Pos_Exp (Adp-Sub; SI; Blood)>]
TA-meta-164	6:38989140 - 6:39089140	Cross/EAS	6:39029802:T:C	rs2268651	Secondary	GLP1R	intronic	NA	NA	0	0.974	++	0.109	-0.04	0.008	4.06e-07	0.129	-0.04	0.009	1.1e-05	0.046	-0.04	0.016	0.0106	GLP1R;KCNK17	GLP1R	GLP1R [nearest(intronic)] / KCNK17 [Non_PAN_SMR <Pos_Exp (Adp-Sub; SI; Blood)>]
TA-meta-165	6:38989140 - 6:39089140	Cross/EAS	6:38992668:T:C	rs2281342	Secondary	DNAH8	intronic	NA	NA	81.9	0.0186	++	0.273	-0.021	0.005	3.73e-05	0.157	-0.006	0.008	0.448	0.348	-0.031	0.007	2.79e-06	DNAH8;KCNK17	DNAH8	DNAH8 [nearest(intronic)] / KCNK17 [Non_PAN_SMR <Pos_Exp (Adp-Sub; SI; Blood)>]
TA-meta-166	6:38989140 - 6:39089140	Cross/EAS	6:39337384:T:A	rs913472	Secondary	KIF6	intronic	NA	NA	19.3	0.266	--	0.344	-0.026	0.005	2.68e-08	0.37	-0.031	0.006	1.24e-06	0.313	-0.02	0.007	0.00347	KIF6;KCNK17;KCNK5	KIF6	KIF6 [nearest(intronic) / Non_PAN_ABC (Brain)] / KCNK17 [Non_PAN_SMR <Pos_Exp (Adp-Sub; SI; Blood)>] / KCNK5 [Non_PAN_ABC (Brain)]
TA-meta-167	6:38989140 - 6:39089140	Cross/EAS	6:39146130:G:A	rs1155349	Secondary	KCNK5(-10.6kb)	intergenic	NA	NA	0	0.436	--	0.224	-0.029	0.005	2.24e-07	0.153	-0.024	0.009	0.00686	0.274	-0.032	0.007	7.79e-06	KCNK17;KCNK5	KCNK5	KCNK17 [Non_PAN_SMR <Pos_Exp (Adp-Sub; SI; Blood)>] / KCNK5 [nearest(intergenic)]
TA-meta-168	6:40359243 - 6:40459243	Cross/EUR	6:40409243:T:C	rs34298980	Primary	LRFN2	intronic	1	1	41.6	0.191	++	0.45	-0.032	0.005	2.21e-11	0.4	-0.025	0.007	0.00016	0.501	-0.038	0.007	1.55e-08	LRFN2	LRFN2	LRFN2 [nearest(intronic)]
TA-meta-169	6:43765364 - 6:43865364	Cross/EUR	6:43815364:A:G	rs6937438	Primary	VEGFA(+61.1kb)	intergenic	0.38	16	57	0.127	--	0.229	0.045	0.006	1.28e-15	0.119	0.033	0.01	0.00041	0.289	0.051	0.007	2.35e-13	VEGFA	VEGFA	VEGFA [nearest(intergenic) / Non_PAN_ABC (THY)]
TA-meta-170	6:43765364 - 6:43865364	Cross/EUR	6:43758873:A:G	rs6905288	Secondary	VEGFA(+4.6kb)	intergenic	NA	NA	0	0.343	++	0.354	-0.034	0.005	2.54e-11	0.232	-0.028	0.008	0.000421	0.436	-0.037	0.006	8.34e-09	VEGFA	VEGFA	VEGFA [nearest(intergenic)]
TA-meta-171	6:50738778 - 6:50838778	Cross/EAS/EUR	6:50788778:A:C	rs3798519	Primary	TFAP2B	intronic	1	1	54.5	0.138	--	0.233	0.052	0.005	1.87e-23	0.263	0.046	0.007	1.67e-11	0.189	0.062	0.008	4.6e-14	TFAP2B	TFAP2B	TFAP2B [nearest(intronic) / Non_PAN_ABC (LIV; Brain)]
TA-meta-172	6:53695477 - 6:53795477	Cross	6:53745477:C:T	rs9395885	Primary	LRRC1	intronic	0.14	11	0	0.672	++	0.207	0.036	0.006	1.47e-09	0.253	0.038	0.007	6.61e-08	0.084	0.032	0.012	0.00546	LRRC1	LRRC1	LRRC1 [nearest(intronic) / rs9349688 [VEP_Medium: R2 (EAS:EUR=0.98:0.99)]]
TA-meta-173	6:83006003 - 6:83106003	Cross	6:83056003:G:A	rs9344272	Primary	TPBG(-16.9kb)	intergenic	0.32	14	0	0.656	--	0.532	-0.025	0.005	2.82e-08	0.421	-0.027	0.006	9.73e-06	0.665	-0.023	0.007	0.000652	TPBG	TPBG	TPBG [nearest(intergenic) / Non_PAN_ABC (Adp)]
TA-meta-174	6:107379304 - 6:107479304	Cross/EUR	6:107429304:C:T	rs73521749	Primary	BEND3	intronic	0.46	4	0	0.871	--	0.28	-0.039	0.005	5.4e-13	0.202	-0.038	0.009	1.3e-05	0.329	-0.04	0.007	9.19e-09	BEND3;C6orf203;LOC100422737;PDSS2;QRSL1	C6orf203	BEND3 [nearest(intronic) / Pan-related <PAN_ABC (PAN_Nasser)> / Non_PAN_ABC (Adp; LIV; MuSc; THY; ADR; Brain; SI; Co); Non_PAN_SMR <Pos_Exp (Blood)>] / C6orf203 [Very-Strongly-Pan-related <PAN_ABC (beta; alpha; acinar; PAN_Nasser)> / Non_PAN_ABC (LIV; MuSc; Brain)] / LOC100422737 [Very-Strongly-Pan-related <PAN_ABC (beta; alpha)>] / PDSS2 [Very-Strongly-Pan-related <PAN_ABC (beta; alpha; acinar)>…
TA-meta-175	6:117946631 - 6:118046631	Cross/EAS	6:117996631:T:C	rs80196932	Primary	NUS1	upstream	0.33	3	34.7	0.216	++	0.185	-0.051	0.006	4.95e-19	0.209	-0.057	0.007	3.7e-14	0.153	-0.043	0.009	1.6e-06	NUS1;GOPC;LOC101927919;ROS1;VGLL2	NUS1	NUS1 [nearest(upstream) / Very-Strongly-Pan-related <PAN_ABC (beta; alpha; acinar; ductal; PAN_Nasser) / PAN-SMR (Neg_Exp)> / Non_PAN_ABC (Adp; LIV; MuSc; THY; ADR; Brain; SI; Co); Non_PAN_SMR <Neg_Exp (Brain)>] / GOPC [Very-Strongly-Pan-related <PAN_ABC (beta; alpha; ductal; PAN_Nasser)> / Non_PAN_ABC (Adp; LIV; MuSc; THY; ADR; Co)] / LOC101927919 [Very-Strongly-Pan-related <PAN_ABC (beta; alpha…
TA-meta-176	6:126742095 - 6:126842095	Cross/EAS/EUR	6:126792095:A:G	rs11759026	Primary	CENPW(+122.1kb)	intergenic	1	1	54.4	0.139	--	0.372	0.058	0.005	9.21e-32	0.477	0.051	0.006	4.49e-15	0.232	0.066	0.007	2.04e-18	CENPW	CENPW	CENPW [nearest(intergenic) / Non_PAN_SMR <Pos_Exp (Adp-Sub; Brain) / Both_Exp (Blood)>]
TA-meta-177	6:131864564 - 6:131964564	Cross/EAS	6:131914564:T:A	rs2781621	Primary	MED23	intronic	0.31	15	25.9	0.245	++	0.294	0.042	0.005	5.54e-17	0.349	0.047	0.006	2.16e-13	0.195	0.034	0.008	4.01e-05	MED23;ARG1;ENPP3	MED23	MED23 [nearest(intronic) / Non_PAN_ABC (LIV; Brain); Non_PAN_SMR <Pos_Exp (MuSc; Blood)>] / ARG1 [Non_PAN_SMR <Pos_Exp (Blood)>] / ENPP3 [Non_PAN_SMR <Pos_Exp (Blood)>]
TA-meta-178	6:137243227 - 6:137343227	Cross/EAS/EUR	6:137293227:C:T	rs2327777	Primary	IL20RA(-27.9kb)	intergenic	0.16	27	0	0.557	++	0.496	0.048	0.004	4.49e-27	0.472	0.05	0.006	1.22e-16	0.525	0.045	0.006	5.74e-12	IL20RA	IL20RA	IL20RA [nearest(intergenic)]
TA-meta-179	6:139158733 - 6:139258733	Cross/EAS	6:139208733:C:A	rs1188832	Primary	ECT2L	intronic	0.07	19	7.1	0.299	--	0.512	-0.028	0.004	3.83e-10	0.4	-0.032	0.006	8.2e-08	0.647	-0.023	0.007	0.000566	ECT2L;ABRACL;REPS1;HECA;TXLNB	ECT2L	ECT2L [nearest(intronic) / Non_PAN_ABC (MuSc; Brain); Non_PAN_SMR <Pos_Exp (Blood)>] / ABRACL [Pan-related <PAN_ABC (PAN_Nasser)> / Non_PAN_ABC (MuSc; Brain)] / REPS1 [Pan-related <PAN_ABC (PAN_Nasser)> / Non_PAN_ABC (Adp; LIV; MuSc; ADR; Brain)] / HECA [Non_PAN_ABC (MuSc; Brain)] / TXLNB [Non_PAN_ABC (Brain)]
TA-meta-180	6:143008692 - 6:143108692	Cross/EAS	6:143058692:G:C	rs6570526	Primary	HIVEP2(-13.9kb)	intergenic	1	1	0	0.518	--	0.416	-0.034	0.004	3.95e-14	0.346	-0.037	0.006	7.03e-09	0.484	-0.031	0.006	7.4e-07	HIVEP2;AIG1;RP11-439L18.3	HIVEP2	HIVEP2 [nearest(intergenic) / Non_PAN_ABC (Adp)] / AIG1 [Non_PAN_ABC (Adp)] / RP11-439L18.3 [Non_PAN_ABC (Adp)]
TA-meta-181	6:143008692 - 6:143108692	Cross/EAS	6:143020752:G:A	rs12200517	Secondary	HIVEP2(-51.9kb)	intergenic	NA	NA	11.4	0.288	++	0.215	0.032	0.005	5.93e-09	0.248	0.027	0.007	8.95e-05	0.163	0.039	0.009	8.46e-06	HIVEP2	HIVEP2	HIVEP2 [nearest(intergenic)]
TA-meta-182	6:153341618 - 6:153441618	Cross/EUR	6:153391618:T:C	rs1933264	Primary	RGS17	intronic	0.02	55	0	0.678	--	0.291	0.035	0.005	3.19e-12	0.326	0.033	0.007	1.96e-06	0.252	0.037	0.007	3.34e-07	RGS17	RGS17	RGS17 [nearest(intronic) / Non_PAN_SMR <Pos_Exp (Brain)>]
TA-meta-183	6:154305100 - 6:154405100	Cross	6:154355100:A:G	rs6936615	Primary	OPRM1	intronic	0.13	37	0	0.943	--	0.143	0.042	0.007	8.04e-09	0.046	0.041	0.015	0.00428	0.176	0.043	0.009	5.09e-07	OPRM1	OPRM1	OPRM1 [nearest(intronic) / Non_PAN_ABC (Brain)]
TA-meta-184	6:156953689 - 6:157053689	Cross	6:157003689:A:C	rs7768451	Primary	ARID1B(-95.4kb)	intergenic	0.06	45	0	0.437	--	0.141	0.04	0.007	3.7e-08	0.165	0.043	0.008	1.48e-07	0.041	0.028	0.016	0.0849	TFB1M;ARID1B	TFB1M	TFB1M [Pan-related <PAN_ABC (PAN_Nasser)>] / ARID1B [nearest(intergenic)]
TA-meta-185	6:160720312 - 6:160820312	Cross/EUR	6:160770312:A:G	rs474513	Primary	SLC22A3	intronic	0.94	2	43.2	0.185	++	0.397	-0.034	0.005	9.83e-14	0.308	-0.028	0.006	1.66e-05	0.484	-0.04	0.006	4.18e-10	SLC22A3;LPAL2;SLC22A1;SLC22A2	SLC22A3	SLC22A3 [nearest(intronic) / Non_PAN_ABC (Adp; LIV; MuSc; THY; ADR; Brain; SI; Co); Non_PAN_SMR <Neg_Exp (LIV)>] / LPAL2 [Non_PAN_ABC (LIV)] / SLC22A1 [Non_PAN_ABC (LIV)] / SLC22A2 [Non_PAN_ABC (LIV)]
TA-meta-186	6:164083001 - 6:164183001	Cross/EUR	6:164133001:C:T	rs4709746	Primary	QKI(+133.4kb)	intergenic	0.3	7	0	0.67	--	0.12	-0.054	0.007	7.32e-15	0.108	-0.051	0.01	3.63e-07	0.131	-0.057	0.01	3.95e-09	AL078585.1;QKI	QKI	AL078585.1 [Non_PAN_ABC (MuSc)] / QKI [nearest(intergenic)]
TA-meta-187	7:7200753 - 7:7300753	Cross	7:7250753:T:C	rs11765592	Primary	C1GALT1	intronic	0.1	44	75.6	0.0431	--	0.18	0.035	0.006	2.7e-09	0.214	0.026	0.007	0.000385	0.12	0.051	0.01	2.5e-07	C1GALT1;AIMP2;EIF2AK1;ICA1;LOC100505938	C1GALT1	C1GALT1 [nearest(intronic) / rs11771259 [VEP_Medium: R2 (EAS:EUR=0.89:0.72)] / Very-Strongly-Pan-related <PAN_ABC (beta; alpha; acinar; ductal; PAN_Nasser) / PAN-SMR (Pos_Exp)> / Non_PAN_ABC (Adp; LIV; MuSc; ADR; Brain; SI; Co); Non_PAN_SMR <Pos_Exp (Adp-Sub; Adp-Vis; THY; ADR; Brain; SI; Co)>] / AIMP2 [Very-Strongly-Pan-related <PAN_ABC (beta; acinar; ductal)>] / EIF2AK1 [Very-Strongly-Pan-relat…
TA-meta-188	7:13837788 - 7:13937788	Cross/EAS	7:13887788:C:A	rs17167575	Primary	ETV1(-43.1kb)	intergenic	0.88	2	79.4	0.0277	++	0.371	0.039	0.005	6.53e-17	0.374	0.048	0.006	3.88e-14	0.368	0.028	0.007	2.93e-05	ETV1	ETV1	ETV1 [nearest(intergenic) / Non_PAN_ABC (Brain)]
TA-meta-189	7:15012983 - 7:15112983	Cross/EAS/EUR	7:15062983:C:T	rs2215383	Primary	DGKB(+48.6kb)	intergenic	0.41	11	0	0.742	--	0.391	-0.063	0.005	6.54e-43	0.317	-0.061	0.006	5.16e-21	0.462	-0.064	0.006	1.06e-23	DGKB	DGKB	DGKB [nearest(intergenic)]
TA-meta-190	7:15012983 - 7:15112983	Cross/EAS/EUR	7:14898282:C:T	rs17168486	Secondary	DGKB	intronic	NA	NA	0	0.435	++	0.344	0.062	0.005	3.57e-37	0.429	0.059	0.006	5.64e-23	0.18	0.067	0.008	4.5e-16	DGKB	DGKB	DGKB [nearest(intronic)]
TA-meta-191	7:23443613 - 7:23543613	Cross	7:23493613:T:A	rs112316332	Primary	IGF2BP3	intronic	0.28	40	0	0.414	--	0.297	-0.033	0.006	1.26e-08	0.368	-0.03	0.007	6.79e-06	0.09	-0.041	0.011	0.000339	IGF2BP3;TRA2A;DFNA5;MPP6;RPS2P32	IGF2BP3	IGF2BP3 [nearest(intronic) / Non_PAN_ABC (MuSc; ADR; Brain; SI)] / TRA2A [Pan-related <PAN_ABC (PAN_Nasser)> / Non_PAN_ABC (Adp; MuSc; ADR; Brain; SI)] / DFNA5 [Non_PAN_ABC (MuSc)] / MPP6 [Non_PAN_ABC (MuSc; ADR; Brain)] / RPS2P32 [Non_PAN_ABC (LIV; MuSc; ADR; Brain; SI)]
TA-meta-192	7:25902059 - 7:26002059	Cross/EAS	7:25952059:G:A	rs35274205	Primary	NFE2L3(-239.8kb)	intergenic	0.44	8	0	0.341	++	0.4	0.029	0.005	7.1e-10	0.495	0.032	0.006	9.38e-08	0.259	0.023	0.007	0.00155	NFE2L3	NFE2L3	NFE2L3 [nearest(intergenic)]
TA-meta-193	7:28146222 - 7:28246222	Cross/EAS/EUR	7:28196222:A:G	rs849134	Primary	JAZF1	intronic	0.45	5	91.2	0.000742	++	0.374	-0.076	0.005	3.36e-56	0.225	-0.057	0.007	1.65e-15	0.492	-0.09	0.006	5.35e-45	JAZF1;JAZF1-AS1	JAZF1	JAZF1 [nearest(intronic) / Very-Strongly-Pan-related <PAN_ABC (beta)> / Non_PAN_ABC (ADR; Brain)] / JAZF1-AS1 [Non_PAN_ABC (ADR; Brain); Non_PAN_SMR <Pos_Exp (Co)>]
TA-meta-194	7:30678452 - 7:30778452	Cross/EAS/EUR	7:30728452:C:T	rs917195	Primary	CRHR2	exonic	0.83	2	0	0.95	--	0.211	-0.047	0.006	3.9e-17	0.19	-0.047	0.008	1.1e-08	0.229	-0.047	0.008	1.03e-09	CRHR2;AC005154.7;GARS;GARS1	CRHR2	CRHR2 [nearest(exonic) / Non_PAN_SMR <Neg_Exp (Brain; PIT; Blood)>] / AC005154.7 [Non_PAN_SMR <Neg_Exp (Blood)>] / GARS [Non_PAN_SMR <Neg_Exp (Blood)>] / GARS1 [Non_PAN_SMR <Neg_Exp (Brain)>]
TA-meta-195	7:44181216 - 7:44281216	Cross/EAS/EUR	7:44231216:T:G	rs3757840	Primary	GCK	intronic	0.5	2	21.8	0.258	++	0.46	-0.04	0.004	3.27e-19	0.42	-0.035	0.006	1.04e-08	0.504	-0.045	0.006	2.31e-12	GCK;AEBP1;MYL7	GCK	GCK [nearest(intronic)] / AEBP1 [Non_PAN_SMR <Neg_Exp (Blood)>] / MYL7 [Non_PAN_SMR <Pos_Exp (Brain)>]
TA-meta-196	7:44181216 - 7:44281216	Cross/EAS/EUR	7:44189321:G:A	rs2268574	Secondary	GCK	intronic	NA	NA	0	0.749	--	0.437	-0.04	0.004	1.58e-18	0.365	-0.041	0.006	9.8e-11	0.509	-0.038	0.006	2.01e-09	GCK;AEBP1;MYL7;POLD2	GCK	GCK [nearest(intronic) / Very-Strongly-Pan-related <PAN_ABC (beta)>] / AEBP1 [Non_PAN_SMR <Neg_Exp (Blood)>] / MYL7 [Non_PAN_SMR <Pos_Exp (Brain)>] / POLD2 [Non_PAN_ABC (MuSc)]
TA-meta-197	7:45040506 - 7:45140506	Cross	7:45090506:G:T	rs7800695	Primary	CCM2	intronic	0.13	11	0	0.323	++	0.195	0.03	0.005	4.28e-08	0.18	0.025	0.008	0.00132	0.21	0.036	0.008	5.14e-06	SNHG15;CCM2;H2AFV;TBRG4;NACAD	SNHG15	SNHG15 [Very-Strongly-Pan-related <PAN_ABC (beta; alpha; acinar; ductal; PAN_Nasser)> / Non_PAN_ABC (Adp; LIV; MuSc; THY; ADR; Brain; SI; Co); Non_PAN_SMR <Pos_Exp (Brain)>] / CCM2 [nearest(intronic) / Pan-related <PAN_ABC (alpha; ductal; PAN_Nasser)> / Non_PAN_ABC (Adp; LIV; MuSc; THY; ADR; Brain; SI; Co); Non_PAN_SMR <Pos_Exp (Brain)>] / H2AFV [Strongly-Pan-related <PAN_ABC (acinar; PAN_Nasser)…
TA-meta-198	7:50759085 - 7:50859085	Cross	7:50809085:G:A	rs13236710	Primary	GRB10	intronic	0.2	7	0	0.586	--	0.14	-0.042	0.006	7.44e-11	0.162	-0.04	0.008	1.4e-06	0.103	-0.047	0.011	9.62e-06	GRB10	GRB10	GRB10 [nearest(intronic) / Pan-related <PAN_ABC (PAN_Nasser)> / Non_PAN_ABC (Adp; MuSc)]
TA-meta-199	7:55785078 - 7:55885078	Cross/EAS	7:55835078:T:C	rs9784904	Primary	SEPT14(-26.2kb)	intergenic	0.08	98	0	0.91	--	0.357	0.03	0.005	8.45e-10	0.45	0.031	0.006	3e-07	0.157	0.03	0.009	0.000764	GBAS;PSPH;PSPHP1;CCT6A;SEPT14	GBAS	GBAS [Pan-related <PAN-SMR (Neg_Exp)> / Non_PAN_SMR <Neg_Exp (THY)>] / PSPH [Pan-related <PAN-SMR (Pos_Exp)> / Non_PAN_SMR <Pos_Exp (Adp-Sub; Adp-Vis; MuSc; THY; ADR; Brain; SI; Co; Blood)>] / PSPHP1 [Pan-related <PAN-SMR (Pos_Exp)> / Non_PAN_SMR <Pos_Exp (Adp-Sub; Adp-Vis; LIV; MuSc; THY; ADR; Brain; PIT; SI; Co; KID; Blood)>] / CCT6A [Non_PAN_SMR <Pos_Exp (Blood)>] / SEPT14 [nearest(intergenic)]
TA-meta-200	7:69646905 - 7:69746905	Cross/EAS	7:69696905:A:G	rs12698877	Primary	AUTS2	intronic	0.32	8	91.8	0.000488	--	0.309	0.048	0.005	7.33e-25	0.338	0.063	0.006	1.21e-23	0.271	0.03	0.007	2.51e-05	AUTS2	AUTS2	AUTS2 [nearest(intronic) / Non_PAN_ABC (Adp)]
TA-meta-201	7:76582253 - 7:76682253	Cross	7:76632253:G:A	rs4406337	Primary	UPK3B	intronic	0.45	12	0	0.876	++	0.28	0.033	0.006	7.87e-09	0.364	0.034	0.007	6.87e-06	0.163	0.032	0.009	0.000287	UPK3B;PMS2P11	UPK3B	UPK3B [nearest(intronic)] / PMS2P11 [Non_PAN_SMR <Pos_Exp (Adp-Sub; Adp-Vis; THY) / Neg_Exp (Co)>]
TA-meta-202	7:77778434 - 7:77878434	Cross	7:77828434:C:T	rs3807648	Primary	MAGI2	intronic	0.18	6	0	0.76	--	0.425	-0.026	0.004	3.92e-09	0.433	-0.027	0.006	6.07e-06	0.417	-0.024	0.006	0.000161	MAGI2	MAGI2	MAGI2 [nearest(intronic)]
TA-meta-203	7:89691410 - 7:89791410	Cross/EAS	7:89741410:C:A	rs2190231	Primary	STEAP1(-42.3kb)	intergenic	0.54	10	NA	NA	+?	0.218	0.064	0.007	2.07e-18	0.218	0.064	0.007	1.28e-18	NA	NA	NA	NA	STEAP2;CLDN12;STEAP1;C7orf63;STEAP2-AS1	STEAP2	STEAP2 [rs194520 [VEP_Medium: R2 (EAS:EUR=0.85:0.84)] / Very-Strongly-Pan-related <PAN_ABC (beta; PAN_Nasser) / PAN-SMR (Pos_Exp)> / Non_PAN_ABC (Adp; LIV; MuSc; THY; ADR; Brain; SI; Co); Non_PAN_SMR <Pos_Exp (Adp-Sub; Adp-Vis; THY; Co) / Neg_Exp (MuSc; ADR; Brain)>] / CLDN12 [Very-Strongly-Pan-related <PAN_ABC (beta; acinar; ductal; PAN_Nasser)> / Non_PAN_ABC (Adp; THY; ADR; SI; Co)] / STEAP1 [n…
TA-meta-204	7:93060055 - 7:93160055	Cross/EAS	7:93110055:C:T	rs2299253	Primary	CALCR	intronic	0.18	8	79.3	0.0279	++	0.415	0.033	0.004	5.4e-13	0.324	0.043	0.006	2.44e-11	0.506	0.023	0.006	0.000379	CALCR	CALCR	CALCR [nearest(intronic) / rs2301680 [VEP_Medium: R2 (EAS:EUR=0.99:1)]]
TA-meta-205	7:100262724 - 7:100362724	Cross	7:100312724:G:A	rs534043	Primary	EPO(-5.7kb)	intergenic	0.19	17	0	0.916	--	0.093	-0.048	0.009	3.37e-08	0.046	-0.046	0.016	0.00381	0.112	-0.048	0.01	2.39e-06	ACTL6B;EPO;GIGYF1;GNB2;POP7	POP7	ACTL6B [Very-Strongly-Pan-related <PAN_ABC (beta; alpha)> / Non_PAN_ABC (Adp; LIV; MuSc; ADR; Brain)] / EPO [nearest(intergenic) / Strongly-Pan-related <PAN_ABC (acinar)> / Non_PAN_ABC (LIV)] / GIGYF1 [Strongly-Pan-related <PAN_ABC (acinar; ductal; PAN_Nasser)> / Non_PAN_ABC (LIV; MuSc; ADR; Brain); Non_PAN_SMR <Pos_Exp (Adp-Sub; THY) / Neg_Exp (Brain; Blood)>] / GNB2 [Very-Strongly-Pan-related <…
TA-meta-206	7:102333690 - 7:102433690	Cross/EAS/EUR	7:102383690:C:A	rs4727554	Primary	FAM185A(-5.7kb)	intergenic	0.12	31	0	0.435	++	0.396	0.034	0.005	7.2e-12	0.296	0.03	0.008	8.43e-05	0.474	0.038	0.007	1.55e-08	FAM185A;POLR2J3;RASA4B;SPDYE2	FAM185A	FAM185A [nearest(intergenic)] / POLR2J3 [Non_PAN_SMR <Neg_Exp (Blood)>] / RASA4B [Non_PAN_SMR <Pos_Exp (Blood)>] / SPDYE2 [Non_PAN_SMR <Neg_Exp (MuSc; Blood)>]
TA-meta-207	7:103394978 - 7:103494978	Cross	7:103444978:C:T	rs39328	Primary	RELN	intronic	0.35	12	2	0.312	++	0.42	0.029	0.004	5.85e-11	0.407	0.025	0.006	6.42e-05	0.434	0.034	0.006	1.21e-07	RELN	RELN	RELN [nearest(intronic)]
TA-meta-208	7:117445667 - 7:117545667	Cross	7:117495667:C:A	rs6976111	Primary	CTTNBP2	intronic	0.72	14	23	0.254	++	0.25	0.03	0.005	3.58e-08	0.161	0.023	0.008	0.00511	0.319	0.036	0.007	1.11e-06	CTTNBP2;LSM8;CAV2;CFTR;MET	LSM8	CTTNBP2 [nearest(intronic) / Pan-related <PAN_ABC (ductal; PAN_Nasser)> / Non_PAN_ABC (Adp; LIV; MuSc; Brain; SI; Co)] / LSM8 [Very-Strongly-Pan-related <PAN_ABC (beta; alpha; acinar)>] / CAV2 [Non_PAN_ABC (Brain)] / CFTR [Non_PAN_ABC (Brain)] / MET [Non_PAN_ABC (Brain)]
TA-meta-209	7:125378042 - 7:125478042	Cross/EAS	7:125428042:G:T	rs118159699	Primary	GRM8(-650.6kb)	intergenic	0.61	12	NA	NA	+?	0.015	0.166	0.03	4.17e-08	0.015	0.166	0.03	4.04e-08	NA	NA	NA	NA	GRM8	GRM8	GRM8 [nearest(intergenic)]
TA-meta-210	7:127203550 - 7:127303550	Cross/EAS	7:127253550:C:T	rs2233580	Primary	PAX4	exonic	1	1	NA	NA	+?	0.09	0.279	0.011	7.05e-150	0.09	0.279	0.011	5.07e-151	NA	NA	NA	NA	PAX4;ARF5;GCC1	PAX4	PAX4 [nearest(exonic) / rs2233580 [VEP_Medium: R2 (EAS:EUR=1:1)]] / ARF5 [Non_PAN_SMR <Pos_Exp (Blood)>] / GCC1 [Non_PAN_SMR <Pos_Exp (Brain; Blood)>]
TA-meta-211	7:127203550 - 7:127303550	Cross/EAS	7:127253551:G:T	rs3824004	Secondary	PAX4	exonic	NA	NA	NA	NA	+?	0.033	0.201	0.016	1.89e-35	0.033	0.201	0.016	2.33e-35	NA	NA	NA	NA	HILPDA;IMPDH1;METTL2B;PAX4;RBM28	RBM28	HILPDA [Very-Strongly-Pan-related <PAN_ABC (beta; alpha; acinar; ductal; PAN_Nasser)> / Non_PAN_ABC (Adp; LIV; MuSc; THY; ADR; Brain; SI; Co)] / IMPDH1 [Strongly-Pan-related <PAN_ABC (acinar; PAN_Nasser)> / Non_PAN_ABC (Adp; LIV; MuSc; THY; ADR; Brain; SI; Co)] / METTL2B [Very-Strongly-Pan-related <PAN_ABC (beta; acinar; ductal; PAN_Nasser)> / Non_PAN_ABC (LIV; THY; ADR; Brain; SI; Co)] / PAX4 [n…
TA-meta-212	7:127203550 - 7:127303550	Cross/EAS	7:127200646:T:C	rs139034871	Secondary	GCC1(-20kb)	intergenic	NA	NA	NA	NA	-?	0.021	0.165	0.026	2.05e-10	0.021	0.165	0.026	2.2e-10	NA	NA	NA	NA	GCC1;ARF5	GCC1	GCC1 [nearest(intergenic) / Non_PAN_SMR <Pos_Exp (Brain; Blood)>] / ARF5 [Non_PAN_SMR <Pos_Exp (Blood)>]
TA-meta-213	7:127203550 - 7:127303550	Cross/EAS	7:127170600:G:A	rs189356053	Secondary	GCC1(-50.1kb)	intergenic	NA	NA	NA	NA	+?	0.007	0.394	0.059	2.53e-11	0.007	0.394	0.059	2.53e-11	NA	NA	NA	NA	GCC1;ARF5	GCC1	GCC1 [nearest(intergenic) / Non_PAN_SMR <Pos_Exp (Brain; Blood)>] / ARF5 [Non_PAN_SMR <Pos_Exp (Blood)>]
TA-meta-214	7:130407926 - 7:130507926	Cross/EUR	7:130457926:G:A	rs1562397	Primary	KLF14(+39kb)	intergenic	1	1	85.7	0.00819	++	0.399	0.042	0.005	5.96e-19	0.467	0.03	0.006	1.36e-06	0.315	0.055	0.007	2.85e-15	KLF14	KLF14	KLF14 [nearest(intergenic)]
TA-meta-215	7:140386560 - 7:140486560	Cross/EAS	7:140436560:G:A	rs62487901	Primary	BRAF	intronic	0.11	51	50.3	0.156	++	0.078	0.061	0.008	3.56e-13	0.085	0.072	0.011	2.39e-10	0.07	0.048	0.013	0.000125	BRAF;MRPS33;ADCK2;AGK;NDUFB2	BRAF	BRAF [nearest(intronic) / Very-Strongly-Pan-related <PAN_ABC (beta; PAN_Nasser)> / Non_PAN_ABC (Adp; MuSc; THY; ADR; Brain; SI)] / MRPS33 [Very-Strongly-Pan-related <PAN_ABC (beta; alpha; acinar; ductal; PAN_Nasser)> / Non_PAN_ABC (Adp; MuSc; THY; ADR; Brain; SI); Non_PAN_SMR <Pos_Exp (Blood)>] / ADCK2 [Very-Strongly-Pan-related <PAN_ABC (beta; alpha; ductal; PAN_Nasser)> / Non_PAN_ABC (Adp; MuSc…
TA-meta-216	7:150487635 - 7:150587635	Cross/EUR	7:150537635:A:G	rs62492368	Primary	AOC1	intronic	0.68	4	80.6	0.0233	++	0.535	-0.032	0.005	3.12e-12	0.407	-0.023	0.006	0.000281	0.688	-0.044	0.007	1.92e-10	AOC1	AOC1	AOC1 [nearest(intronic) / Non_PAN_SMR <Pos_Exp (THY)>]
TA-meta-217	7:156974510 - 7:157074510	Cross/EAS/EUR	7:157024510:G:A	rs1182444	Primary	UBE3C	intronic	0.07	46	0	0.578	--	0.425	-0.055	0.004	1.38e-34	0.495	-0.053	0.006	2.37e-18	0.338	-0.058	0.007	8.27e-18	UBE3C;DNAJB6;MNX1-AS1;NOM1;MNX1	UBE3C	UBE3C [nearest(intronic) / rs2301914 [VEP_High: R2 (EAS:EUR=0.99:1)] / Very-Strongly-Pan-related <PAN_ABC (beta; alpha; ductal; PAN_Nasser)> / Non_PAN_ABC (Adp; LIV; MuSc; THY; ADR; Brain; SI; Co); Non_PAN_SMR <Neg_Exp (MuSc; Brain; Blood)>] / DNAJB6 [Strongly-Pan-related <PAN_ABC (acinar; ductal; PAN_Nasser)> / Non_PAN_ABC (Adp; LIV; MuSc; THY; ADR; Brain; SI; Co)] / MNX1-AS1 [Strongly-Pan-relat…
TA-meta-218	7:156974510 - 7:157074510	Cross/EAS/EUR	7:156787800:T:C	rs4716673	Secondary	MNX1	intronic	NA	NA	81.4	0.0203	++	0.183	-0.058	0.007	7.49e-15	0.204	-0.051	0.008	1.29e-10	0.031	-0.103	0.021	1.01e-06	MNX1;MNX1-AS1;NOM1;UBE3C;DNAJB6	MNX1	MNX1 [nearest(intronic) / Pan-related <PAN_ABC (ductal; PAN_Nasser)> / Non_PAN_ABC (LIV; Brain; SI; Co)] / MNX1-AS1 [Strongly-Pan-related <PAN_ABC (alpha; acinar; ductal; PAN_Nasser)> / Non_PAN_ABC (LIV; SI; Co)] / NOM1 [Pan-related <PAN_ABC (PAN_Nasser)> / Non_PAN_ABC (SI; Co); Non_PAN_SMR <Neg_Exp (Blood)>] / UBE3C [Pan-related <PAN_ABC (PAN_Nasser)> / Non_PAN_ABC (SI; Co); Non_PAN_SMR <Neg_Exp…
TA-meta-219	7:156974510 - 7:157074510	Cross/EAS/EUR	7:156815971:A:G	rs4716447	Secondary	MNX1(+12.6kb)	intergenic	NA	NA	31.2	0.228	++	0.558	-0.032	0.005	1.5e-10	0.395	-0.038	0.007	3.14e-08	0.744	-0.026	0.007	0.000519	MNX1;NOM1;UBE3C	MNX1	MNX1 [nearest(intergenic)] / NOM1 [Non_PAN_SMR <Neg_Exp (Blood)>] / UBE3C [Non_PAN_SMR <Neg_Exp (MuSc; Brain; Blood)>]
TA-meta-220	8:9924824 - 8:10024824	Cross/EUR	8:9974824:G:A	rs17689007	Primary	MSRA	intronic	0.6	4	0	0.9	--	0.438	-0.047	0.006	9.64e-14	0.015	-0.05	0.026	0.0571	0.464	-0.047	0.006	5.62e-13	MSRA;CLDN23;ERI1;MFHAS1;MTMR9	MSRA	MSRA [nearest(intronic) / Non_PAN_ABC (Adp; ADR)] / CLDN23 [Non_PAN_ABC (Adp)] / ERI1 [Non_PAN_ABC (Adp)] / MFHAS1 [Non_PAN_ABC (Adp)] / MTMR9 [Non_PAN_ABC (Adp)]
TA-meta-221	8:10748828 - 8:10848828	Cross	8:10798828:T:C	rs11250093	Primary	XKR6	intronic	0.33	34	62.9	0.101	++	0.487	-0.039	0.006	6.41e-11	0.044	-0.015	0.016	0.37	0.558	-0.043	0.006	2.3e-11	XKR6;AF131215.2;AF131215.6;AF131215.9	XKR6	XKR6 [nearest(intronic)] / AF131215.2 [Non_PAN_SMR <Neg_Exp (Adp-Vis; THY)>] / AF131215.6 [Non_PAN_SMR <Pos_Exp (Brain)>] / AF131215.9 [Non_PAN_SMR <Neg_Exp (Adp-Vis; THY)>]
TA-meta-222	8:12574425 - 8:12674425	Cross/EUR	8:12624425:A:T	rs7464506	Primary	LONRF1(+10.8kb)	intergenic	0.33	7	52.2	0.148	--	0.331	0.028	0.005	3.62e-09	0.33	0.021	0.007	0.00124	0.332	0.035	0.007	2.71e-07	LONRF1	LONRF1	LONRF1 [nearest(intergenic) / Non_PAN_ABC (MuSc; THY; Co)]
TA-meta-223	8:13457247 - 8:13557247	Cross	8:13507247:C:T	rs6982584	Primary	C8orf48(+81.5kb)	intergenic	0.16	10	23.6	0.253	++	0.367	0.028	0.005	1.89e-09	0.374	0.023	0.006	0.000483	0.36	0.033	0.007	4.83e-07	C8orf48	C8orf48	C8orf48 [nearest(intergenic)]
TA-meta-224	8:17864865 - 8:17964865	Cross/EAS	8:17914865:TA:T	rs5889764	Primary	ASAH1	3UTR	0.08	55	NA	NA	+?	0.064	0.075	0.012	4.62e-10	0.064	0.075	0.012	4.57e-10	NA	NA	NA	NA	ASAH1;AC124242.1	ASAH1	ASAH1 [nearest(3UTR)] / AC124242.1 [Non_PAN_SMR <Pos_Exp (Brain)>]
TA-meta-225	8:19794415 - 8:19894415	Cross/EUR	8:19844415:A:G	rs7819706	Primary	LPL(+19.6kb)	intergenic	0.17	36	87.4	0.0048	++	0.116	-0.046	0.007	2.56e-11	0.116	-0.028	0.01	0.00326	0.117	-0.067	0.01	2.82e-11	LPL	LPL	LPL [nearest(intergenic) / rs328 [VEP_High: R2 (EAS:EUR=0.98:0.69)] / Non_PAN_SMR <Neg_Exp (Blood)>]
TA-meta-226	8:25414670 - 8:25514670	Cross	8:25464670:G:T	rs73221948	Primary	CDCA2(+99.2kb)	intergenic	0.99	1	18.4	0.268	++	0.299	0.032	0.005	4.51e-09	0.307	0.025	0.008	0.00105	0.29	0.037	0.007	7.5e-07	CDCA2	CDCA2	CDCA2 [nearest(intergenic)]
TA-meta-227	8:28011823 - 8:28111823	Cross	8:28061823:G:A	rs62500888	Primary	ELP3(+13.2kb)	intergenic	0.35	11	50.7	0.154	++	0.505	0.025	0.004	8.32e-09	0.459	0.031	0.006	1.75e-07	0.56	0.019	0.006	0.00417	ELP3	ELP3	ELP3 [nearest(intergenic)]
TA-meta-228	8:34461569 - 8:34561569	Cross	8:34511569:A:G	rs16882628	Primary	UNC5D(-581.4kb)	intergenic	0.02	252	0	0.33	++	0.27	-0.038	0.007	3.17e-08	0.28	-0.036	0.007	1.43e-07	0.01	-0.072	0.036	0.0449	UNC5D	UNC5D	UNC5D [nearest(intergenic)]
TA-meta-229	8:36799946 - 8:36899946	Cross/EAS	8:36849946:C:G	rs4286946	Primary	KCNU1(+56.3kb)	intergenic	0.23	13	32	0.225	--	0.286	0.039	0.005	3.07e-14	0.349	0.044	0.006	8.66e-12	0.176	0.031	0.009	0.000308	KCNU1;RP11-419C23.1	KCNU1	KCNU1 [nearest(intergenic)] / RP11-419C23.1 [Non_PAN_SMR <Pos_Exp (Adp-Sub)>]
TA-meta-230	8:37347803 - 8:37447803	Cross/EAS	8:37397803:T:C	rs12680217	Primary	ZNF703(-155.5kb)	intergenic	0.25	9	0	0.556	++	0.383	-0.042	0.006	1.57e-13	0.451	-0.04	0.006	1.08e-10	0.066	-0.049	0.013	0.000279	ZNF703;RP11-150O12.6	ZNF703	ZNF703 [nearest(intergenic) / Non_PAN_SMR <Pos_Exp (Adp-Sub)>] / RP11-150O12.6 [Non_PAN_ABC (Adp)]
TA-meta-231	8:38308081 - 8:38408081	Cross/EAS	8:38358081:T:A	rs13278033	Primary	C8orf86(-10.3kb)	intergenic	0.56	7	49	0.161	++	0.363	0.027	0.005	3.28e-09	0.409	0.033	0.006	6.79e-08	0.303	0.02	0.007	0.00417	C8orf86;FGFR1	C8orf86	C8orf86 [nearest(intergenic)] / FGFR1 [Non_PAN_SMR <Pos_Exp (Blood)>]
TA-meta-232	8:41459915 - 8:41559915	Cross/EAS/EUR	8:41509915:C:T	rs4736819	Primary	ANK1	downstream	0.91	5	0	0.6	++	0.493	0.067	0.004	5.84e-53	0.44	0.069	0.006	1.68e-30	0.553	0.065	0.006	4.76e-24	ANK1;NKX6-3;AC009630.1;AGPAT6;GINS4	NKX6-3	ANK1 [nearest(downstream) / Non_PAN_SMR <Neg_Exp (Adp-Sub; MuSc; Brain; Co; Blood)>] / NKX6-3 [Very-Strongly-Pan-related <PAN_ABC (beta)>] / AC009630.1 [Non_PAN_SMR <Neg_Exp (Brain)>] / AGPAT6 [Non_PAN_ABC (MuSc)] / GINS4 [Non_PAN_ABC (MuSc)]
TA-meta-233	8:41459915 - 8:41559915	Cross/EAS/EUR	8:41508577:C:A	rs13262861	Secondary	NKX6-3	5UTR	NA	NA	0	0.727	--	0.156	-0.094	0.006	9.93e-51	0.14	-0.096	0.009	3.78e-26	0.171	-0.092	0.009	3.04e-26	NKX6-3;AGPAT6;C8orf4;GINS4;GOLGA7	NKX6-3	NKX6-3 [nearest(5UTR) / Very-Strongly-Pan-related <PAN_ABC (beta)>] / AGPAT6 [Non_PAN_ABC (MuSc)] / C8orf4 [Non_PAN_ABC (MuSc)] / GINS4 [Non_PAN_ABC (MuSc)] / GOLGA7 [Non_PAN_ABC (MuSc)]
TA-meta-234	8:41459915 - 8:41559915	Cross/EAS/EUR	8:41519504:C:T	rs117600369	Secondary	ANK1	intronic	NA	NA	0	0.466	-+	0.024	-0.09	0.02	6.7e-06	0.024	-0.092	0.02	4.97e-06	0.001	0.035	0.173	0.837	ANK1;NKX6-3;AGPAT6;C8orf4;GINS4	NKX6-3	ANK1 [nearest(intronic) / rs201439151 [VEP_Medium: R2 (EAS:EUR=ND:1)] / Non_PAN_SMR <Neg_Exp (Adp-Sub; MuSc; Brain; Co; Blood)>] / NKX6-3 [Very-Strongly-Pan-related <PAN_ABC (beta)>] / AGPAT6 [Non_PAN_ABC (MuSc)] / C8orf4 [Non_PAN_ABC (MuSc)] / GINS4 [Non_PAN_ABC (MuSc)]
TA-meta-235	8:57448704 - 8:57548704	Cross/EAS	8:57498704:C:A	rs6651357	Primary	PENK(+139.4kb)	intergenic	0.2	12	14	0.281	++	0.315	0.032	0.005	2.03e-11	0.336	0.037	0.006	1.33e-08	0.291	0.026	0.007	0.000168	LINC00968;PENK	LINC00968	LINC00968 [Pan-related <PAN_ABC (PAN_Nasser)> / Non_PAN_ABC (Adp; LIV; MuSc; ADR; Co)] / PENK [nearest(intergenic)]
TA-meta-236	8:75147129 - 8:75247129	Cross/EAS	8:75197129:G:A	rs142959079	Primary	JPH1	intronic	0.38	7	0	0.445	++	0.022	0.117	0.017	5.22e-12	0.026	0.124	0.019	1.29e-10	0.01	0.093	0.035	0.00826	JPH1	JPH1	JPH1 [nearest(intronic)]
TA-meta-237	8:95911626 - 8:96011626	Cross/EAS/EUR	8:95961626:C:T	rs10097617	Primary	TP53INP1:NDUFAF6	5UTR:intronic	0.08	24	43.2	0.184	++	0.394	0.043	0.005	1.25e-20	0.296	0.036	0.007	2.62e-08	0.485	0.049	0.006	2.44e-14	TP53INP1;INTS8;NDUFAF6;CCNE2;LOC105375650	TP53INP1	TP53INP1 [nearest(5UTR:intronic) / Very-Strongly-Pan-related <PAN_ABC (beta; alpha; acinar; ductal; PAN_Nasser)> / Non_PAN_ABC (Adp; LIV; MuSc; THY; ADR; Brain; SI; Co); Non_PAN_SMR <Pos_Exp (Brain) / Neg_Exp (Blood)>] / INTS8 [Very-Strongly-Pan-related <PAN_ABC (beta; PAN_Nasser)> / Non_PAN_ABC (LIV; MuSc; ADR; Brain); Non_PAN_SMR <Neg_Exp (Blood)>] / NDUFAF6 [Very-Strongly-Pan-related <PAN_ABC …
TA-meta-238	8:95911626 - 8:96011626	Cross/EAS/EUR	8:95675372:A:G	rs1895874	Secondary	ESRP1	intronic	NA	NA	0	0.766	++	0.382	-0.026	0.005	3.81e-08	0.269	-0.024	0.007	0.00041	0.48	-0.027	0.006	2.21e-05	ESRP1;CCNE2;INTS8;NDUFAF6;TP53INP1	ESRP1	ESRP1 [nearest(intronic)] / CCNE2 [Non_PAN_SMR <Neg_Exp (Adp-Vis) / Both_Exp (Blood)>] / INTS8 [Non_PAN_SMR <Neg_Exp (Blood)>] / NDUFAF6 [Non_PAN_SMR <Neg_Exp (Adp-Sub; Co)>] / TP53INP1 [Non_PAN_SMR <Pos_Exp (Brain) / Neg_Exp (Blood)>]
TA-meta-239	8:97095228 - 8:97195228	Cross	8:97145228:G:A	rs2440217	Primary	GDF6(-9.3kb)	intergenic	0.36	18	0	0.721	--	0.324	-0.027	0.005	3.89e-08	0.222	-0.029	0.008	0.00013	0.398	-0.026	0.006	7.06e-05	GDF6	GDF6	GDF6 [nearest(intergenic)]
TA-meta-240	8:116418082 - 8:116518082	Cross/EUR	8:116468082:A:G	rs800887	Primary	TRPS1	intronic	0.15	120	0	0.319	--	0.352	0.031	0.005	1.97e-09	0.205	0.024	0.008	0.00363	0.441	0.035	0.006	9.02e-08	TRPS1;CSMD3;EIF3H;UTP23	TRPS1	TRPS1 [nearest(intronic) / Non_PAN_ABC (MuSc); Non_PAN_SMR <Pos_Exp (Brain)>] / CSMD3 [Non_PAN_ABC (MuSc)] / EIF3H [Non_PAN_ABC (MuSc)] / UTP23 [Non_PAN_ABC (MuSc)]
TA-meta-241	8:118134783 - 8:118234783	Cross/EAS/EUR	8:118184783:C:T	rs13266634	Primary	SLC30A8	exonic	1	1	0	0.956	--	0.376	-0.108	0.004	2.9e-125	0.423	-0.108	0.006	2.16e-72	0.315	-0.108	0.007	1.44e-54	SLC30A8	SLC30A8	SLC30A8 [nearest(exonic) / rs13266634 [VEP_Low: R2 (EAS:EUR=1:1)]]
TA-meta-242	8:126424751 - 8:126524751	Cross/EAS	8:126474751:C:T	rs78938736	Primary	TRIB1(+24.1kb)	intergenic	0.55	11	NA	NA	+?	0.352	0.041	0.007	4.71e-09	0.352	0.041	0.007	4.05e-09	NA	NA	NA	NA	TRIB1;KIAA0196;NSMCE2	TRIB1	TRIB1 [nearest(intergenic) / Non_PAN_ABC (ADR)] / KIAA0196 [Non_PAN_ABC (ADR)] / NSMCE2 [Non_PAN_ABC (ADR)]
TA-meta-243	8:128661742 - 8:128761742	Cross/EUR	8:128711742:G:A	rs17772814	Primary	MYC(-35.9kb)	intergenic	0.99	1	NA	NA	?-	0.086	-0.075	0.013	2.4e-09	NA	NA	NA	NA	0.086	-0.075	0.013	2.13e-09	MYC	MYC	MYC [nearest(intergenic)]
TA-meta-244	8:129521140 - 8:129621140	Cross/EUR	8:129571140:G:T	rs28455755	Primary	TMEM75(+610.5kb)	intergenic	0.12	34	11.2	0.289	++	0.109	0.059	0.009	5.7e-12	0.024	0.078	0.02	8.54e-05	0.129	0.055	0.01	9.41e-09	CCAT1;FAM49B;MYC;CASC11;PVT1	CCAT1	CCAT1 [Strongly-Pan-related <PAN_ABC (acinar; ductal; PAN_Nasser)>] / FAM49B [Strongly-Pan-related <PAN_ABC (acinar; ductal; PAN_Nasser)> / Non_PAN_ABC (LIV)] / MYC [Strongly-Pan-related <PAN_ABC (acinar; ductal; PAN_Nasser)> / Non_PAN_ABC (LIV)] / CASC11 [Pan-related <PAN_ABC (PAN_Nasser)> / Non_PAN_ABC (LIV)] / PVT1 [Pan-related <PAN_ABC (PAN_Nasser)> / Non_PAN_ABC (LIV)]
TA-meta-245	8:132825320 - 8:132925320	Cross/EAS	8:132875320:C:T	rs7828631	Primary	EFR3A(-41kb)	intergenic	0.12	45	0	0.556	++	0.217	0.038	0.006	4.06e-11	0.266	0.04	0.007	5.34e-09	0.104	0.033	0.011	0.00168	EFR3A	EFR3A	EFR3A [nearest(intergenic)]
TA-meta-246	8:144456133 - 8:144556133	Cross	8:144506133:C:G	rs13267937	Primary	MAFA	intronic	0.17	9	0	0.649	++	0.279	-0.03	0.005	8.55e-09	0.298	-0.032	0.007	6.13e-06	0.256	-0.027	0.008	0.000392	MAFA	MAFA	MAFA [nearest(intronic) / Very-Strongly-Pan-related <PAN_ABC (beta)> / Non_PAN_ABC (Brain)]
TA-meta-247	8:145496036 - 8:145596036	Cross/EUR	8:145546036:A:G	rs3757970	Primary	DGAT1	intronic	0.76	7	78.7	0.0303	--	0.421	0.04	0.005	1.05e-15	0.473	0.029	0.007	6.89e-05	0.374	0.05	0.007	3.36e-13	DGAT1;HSF1;BOP1;FBXL6;SLC52A2	DGAT1	DGAT1 [nearest(intronic) / Very-Strongly-Pan-related <PAN_ABC (beta; alpha; acinar; ductal; PAN_Nasser)> / Non_PAN_ABC (Adp; LIV; MuSc; THY; ADR; Brain; SI; Co); Non_PAN_SMR <Neg_Exp (Blood)>] / HSF1 [Very-Strongly-Pan-related <PAN_ABC (beta; alpha; acinar; ductal; PAN_Nasser)> / Non_PAN_ABC (Adp; LIV; MuSc; THY; ADR; Brain; SI; Co); Non_PAN_SMR <Neg_Exp (Blood)>] / BOP1 [Strongly-Pan-related <PA…
TA-meta-248	8:145496036 - 8:145596036	Cross/EUR	8:145972950:T:C	rs2953845	Secondary	ZNF251	intronic	NA	NA	0	0.506	++	0.372	-0.032	0.005	7.08e-12	0.278	-0.029	0.007	2.84e-05	0.455	-0.035	0.006	4.95e-08	RPL8;ZNF251;ZNF34;COMMD5;ZNF517	ZNF251	RPL8 [Very-Strongly-Pan-related <PAN_ABC (beta; alpha; acinar; ductal; PAN_Nasser) / PAN-SMR (Pos_Exp)> / Non_PAN_ABC (Adp; LIV; MuSc; THY; ADR; Brain; SI; Co); Non_PAN_SMR <Pos_Exp (Adp-Sub; Adp-Vis; MuSc; THY; Co) / Neg_Exp (Blood); Both_Exp (Brain)>] / ZNF251 [nearest(intronic) / Very-Strongly-Pan-related <PAN_ABC (beta; alpha; PAN_Nasser)> / Non_PAN_ABC (Adp; LIV; MuSc; THY; ADR; Brain; SI; C…
TA-meta-249	9:982567 - 9:1082567	Cross/EAS	9:1032567:G:A	rs1016565	Primary	DMRT2(-17.8kb)	intergenic	1	1	0	0.325	++	0.377	0.029	0.004	1.45e-10	0.425	0.033	0.006	4.27e-08	0.313	0.024	0.007	0.000543	DMRT2	DMRT2	DMRT2 [nearest(intergenic)]
TA-meta-250	9:4241928 - 9:4341928	Cross/EAS/EUR	9:4291928:A:C	rs10974438	Primary	GLIS3	intronic	0.97	1	49.1	0.161	--	0.363	0.058	0.005	1.43e-37	0.366	0.064	0.006	9.26e-25	0.358	0.051	0.007	1.71e-14	GLIS3	GLIS3	GLIS3 [nearest(intronic)]
TA-meta-251	9:4241928 - 9:4341928	Cross/EAS/EUR	9:4288709:A:G	rs67339302	Secondary	GLIS3	intronic	NA	NA	0	0.927	++	0.032	-0.091	0.014	3.73e-11	0.039	-0.092	0.016	1.41e-08	0.016	-0.089	0.026	0.000702	GLIS3;SLC1A1;PLGRKT;RLN1;RP11-32F11.2	GLIS3	GLIS3 [nearest(intronic) / rs1341959990 [VEP_Low: R2 (EAS:EUR=1:ND)] / Non_PAN_ABC (Brain)] / SLC1A1 [Pan-related <PAN_ABC (PAN_Nasser)> / Non_PAN_ABC (LIV; MuSc; ADR; Brain)] / PLGRKT [Non_PAN_ABC (LIV; ADR; Brain)] / RLN1 [Non_PAN_ABC (Co)] / RP11-32F11.2 [Non_PAN_ABC (Brain)]
TA-meta-252	9:19016115 - 9:19116115	Cross/EUR	9:19066115:A:G	rs4439216	Primary	HAUS6	intronic	0.1	22	67.4	0.0797	--	0.317	0.032	0.005	4.58e-11	0.222	0.022	0.007	0.00191	0.394	0.039	0.006	1.28e-09	RRAGA;HAUS6;PLIN2;RPS6;SH3GL2	RRAGA	RRAGA [Very-Strongly-Pan-related <PAN_ABC (beta; alpha; acinar; ductal; PAN_Nasser)> / Non_PAN_ABC (Adp; LIV; MuSc; THY; ADR; Brain; SI; Co); Non_PAN_SMR <Pos_Exp (Blood)>] / HAUS6 [nearest(intronic) / Pan-related <PAN_ABC (PAN_Nasser)> / Non_PAN_ABC (Adp; LIV; MuSc; THY; ADR; Brain; SI; Co); Non_PAN_SMR <Pos_Exp (Adp-Vis; Blood)>] / PLIN2 [Strongly-Pan-related <PAN_ABC (alpha; acinar; ductal; PA…
TA-meta-253	9:20765907 - 9:20865907	Cross	9:20815907:T:C	rs6475477	Primary	FOCAD	intronic	0.77	24	0	0.436	--	0.411	0.027	0.005	2.79e-09	0.335	0.024	0.006	0.000333	0.485	0.031	0.006	1.66e-06	FOCAD	FOCAD	FOCAD [nearest(intronic) / Non_PAN_SMR <Pos_Exp (Blood)>]
TA-meta-254	9:22084094 - 9:22184094	Cross/EAS/EUR	9:22134094:T:C	rs10811661	Primary	CDKN2B(+124.7kb)	intergenic	0.25	4	56	0.132	++	0.347	-0.17	0.005	1.56e-262	0.432	-0.176	0.006	3.74e-187	0.17	-0.16	0.009	3.16e-77	CDKN2B;CDKN2A;CDKN2B-AS1	CDKN2B	CDKN2B [nearest(intergenic) / Non_PAN_SMR <Pos_Exp (Blood) / Neg_Exp (Brain)>] / CDKN2A [Non_PAN_SMR <Neg_Exp (Brain)>] / CDKN2B-AS1 [Non_PAN_SMR <Neg_Exp (Brain)>]
TA-meta-255	9:22084094 - 9:22184094	Cross/EAS/EUR	9:22137685:T:G	rs7018475	Secondary	CDKN2B(+128.3kb)	intergenic	NA	NA	96.6	5.16e-08	--	0.327	0.075	0.005	4.64e-56	0.371	0.052	0.006	7.89e-17	0.269	0.104	0.007	3.02e-47	CDKN2B;CDKN2A;CDKN2B-AS1	CDKN2B	CDKN2B [nearest(intergenic) / Non_PAN_SMR <Pos_Exp (Blood) / Neg_Exp (Brain)>] / CDKN2A [Non_PAN_SMR <Neg_Exp (Brain)>] / CDKN2B-AS1 [Non_PAN_SMR <Neg_Exp (Brain)>]
TA-meta-256	9:22084094 - 9:22184094	Cross/EAS/EUR	9:22301092:T:A	rs1575972	Secondary	DMRTA1(-145.7kb)	intergenic	NA	NA	56.4	0.13	--	0.041	-0.097	0.012	2.87e-17	0.046	-0.111	0.015	7.14e-14	0.034	-0.076	0.018	2.44e-05	CDKN2B;CDKN2B-AS1;DMRTA1	DMRTA1	CDKN2B [Non_PAN_SMR <Pos_Exp (Blood) / Neg_Exp (Brain)>] / CDKN2B-AS1 [Non_PAN_SMR <Neg_Exp (Brain)>] / DMRTA1 [nearest(intergenic)]
TA-meta-257	9:22084094 - 9:22184094	Cross/EAS/EUR	9:22125913:T:C	rs1333050	Secondary	CDKN2B(+116.6kb)	intergenic	NA	NA	78.7	0.0302	++	0.422	-0.03	0.005	4.6e-10	0.484	-0.02	0.006	0.00203	0.35	-0.041	0.007	6.03e-09	CDKN2B;CDKN2A;CDKN2B-AS1	CDKN2B	CDKN2B [nearest(intergenic) / Non_PAN_SMR <Pos_Exp (Blood) / Neg_Exp (Brain)>] / CDKN2A [Non_PAN_SMR <Neg_Exp (Brain)>] / CDKN2B-AS1 [Non_PAN_SMR <Neg_Exp (Brain)>]
TA-meta-258	9:22084094 - 9:22184094	Cross/EAS/EUR	9:21856685:A:G	rs72691580	Secondary	MTAP	intronic	NA	NA	0	0.889	++	0.176	-0.022	0.006	0.000429	0.212	-0.022	0.007	0.00319	0.079	-0.024	0.012	0.052	CDKN2A;CDKN2B-AS1;MTAP;CDKN2B;DMRTA1	MTAP	CDKN2A [Pan-related <PAN_ABC (PAN_Nasser)> / Non_PAN_SMR <Neg_Exp (Brain)>] / CDKN2B-AS1 [Pan-related <PAN_ABC (PAN_Nasser)> / Non_PAN_ABC (ADR); Non_PAN_SMR <Neg_Exp (Brain)>] / MTAP [nearest(intronic) / Non_PAN_ABC (ADR)] / CDKN2B [Non_PAN_ABC (ADR); Non_PAN_SMR <Pos_Exp (Blood) / Neg_Exp (Brain)>] / DMRTA1 [Non_PAN_ABC (ADR)]
TA-meta-259	9:22084094 - 9:22184094	Cross/EAS/EUR	9:22134172:T:C	rs10757283	Secondary	CDKN2B(+124.8kb)	intergenic	NA	NA	98.7	1.31e-18	-+	0.466	0.02	0.004	5.89e-06	0.369	0.059	0.006	3.46e-21	0.569	-0.021	0.006	0.00151	CDKN2B;CDKN2A;CDKN2B-AS1	CDKN2B	CDKN2B [nearest(intergenic) / Non_PAN_SMR <Pos_Exp (Blood) / Neg_Exp (Brain)>] / CDKN2A [Non_PAN_SMR <Neg_Exp (Brain)>] / CDKN2B-AS1 [Non_PAN_SMR <Neg_Exp (Brain)>]
TA-meta-260	9:34024476 - 9:34124476	Cross/EUR	9:34074476:C:T	rs12001437	Primary	DCAF12(-11.9kb)	intergenic	1	1	55.7	0.133	--	0.518	-0.033	0.004	2e-13	0.422	-0.027	0.006	1.31e-05	0.631	-0.04	0.007	1.1e-09	DCAF12;UBAP2;RP11-176F3.7;UBE2R2	DCAF12	DCAF12 [nearest(intergenic) / rs11557154 [VEP_Medium: R2 (EAS:EUR=0.94:0.24)] / Pan-related <PAN_ABC (PAN_Nasser)>] / UBAP2 [Pan-related <PAN_ABC (PAN_Nasser)> / Non_PAN_ABC (ADR; SI)] / RP11-176F3.7 [Non_PAN_SMR <Neg_Exp (Blood)>] / UBE2R2 [Non_PAN_SMR <Pos_Exp (Blood)>]
TA-meta-261	9:81867127 - 9:81967127	Cross/EAS/EUR	9:81917127:T:C	rs1328412	Primary	TLE4(-269.6kb)	intergenic	0.46	8	0	0.678	++	0.063	-0.09	0.009	2.59e-22	0.054	-0.086	0.013	1.57e-10	0.072	-0.094	0.013	2.34e-13	TLE4	TLE4	TLE4 [nearest(intergenic)]
TA-meta-262	9:84258948 - 9:84358948	Cross/EAS/EUR	9:84308948:A:G	rs2796441	Primary	TLE1(+4.7kb)	intergenic	1	1	0	0.419	--	0.485	0.071	0.004	1.03e-57	0.388	0.075	0.006	4.49e-34	0.594	0.067	0.006	2.97e-25	TLE1	TLE1	TLE1 [nearest(intergenic) / Non_PAN_ABC (Brain); Non_PAN_SMR <Pos_Exp (Blood)>]
TA-meta-263	9:84258948 - 9:84358948	Cross/EAS/EUR	9:83986413:A:C	rs7038995	Secondary	TLE1(-212.2kb)	intergenic	NA	NA	88.3	0.00349	++	0.517	-0.032	0.005	2.27e-11	0.359	-0.044	0.006	4.21e-12	0.706	-0.016	0.007	0.0187	TLE1	TLE1	TLE1 [nearest(intergenic) / Non_PAN_SMR <Pos_Exp (Blood)>]
TA-meta-264	9:84258948 - 9:84358948	Cross/EAS/EUR	9:84241308:T:C	rs815843	Secondary	TLE1	intronic	NA	NA	90.7	0.00103	--	0.065	0.06	0.01	1.46e-09	0.037	0.106	0.017	5.78e-10	0.08	0.037	0.012	0.00281	TLE1	TLE1	TLE1 [nearest(intronic) / Non_PAN_SMR <Pos_Exp (Blood)>]
TA-meta-265	9:96920220 - 9:97020220	Cross/EUR	9:96970220:T:C	rs10993095	Primary	ZNF169(-51.4kb)	intergenic	0.15	27	67.8	0.078	--	0.399	0.028	0.004	9.49e-10	0.462	0.021	0.006	0.000783	0.321	0.037	0.007	6.95e-08	CARD19;IPPK;NINJ1;ZNF169;ZNF484	NINJ1	CARD19 [Very-Strongly-Pan-related <PAN_ABC (beta; alpha; acinar; ductal)>] / IPPK [Strongly-Pan-related <PAN_ABC (acinar; ductal; PAN_Nasser)> / Non_PAN_ABC (MuSc)] / NINJ1 [Very-Strongly-Pan-related <PAN_ABC (beta; acinar; ductal; PAN_Nasser)> / Non_PAN_ABC (MuSc; Brain)] / ZNF169 [nearest(intergenic) / Pan-related <PAN_ABC (PAN_Nasser)> / Non_PAN_ABC (LIV; MuSc; THY; ADR; Brain; SI; Co)] / ZNF4…
TA-meta-266	9:98175056 - 9:98275056	Cross/EAS	9:98225056:G:T	rs28377268	Primary	PTCH1	intronic	0.63	8	0	0.393	--	0.177	-0.037	0.006	1.01e-09	0.209	-0.041	0.008	6.61e-08	0.12	-0.03	0.01	0.00266	PTCH1;C9orf3;ERCC6L2;FANCC;LINC00476	PTCH1	PTCH1 [nearest(intronic) / Non_PAN_ABC (Brain)] / C9orf3 [Non_PAN_ABC (Brain)] / ERCC6L2 [Non_PAN_ABC (Brain)] / FANCC [Non_PAN_ABC (Brain)] / LINC00476 [Non_PAN_ABC (Brain)]
TA-meta-267	9:98175056 - 9:98275056	Cross/EAS	9:97780363:G:C	rs1412488	Secondary	C9orf3	intronic	NA	NA	70	0.0679	--	0.154	-0.036	0.007	6.57e-08	0.186	-0.026	0.009	0.0029	0.108	-0.05	0.01	1.05e-06	C9orf3;FBP1;PCAT7;FANCC;SLC35D2	C9orf3	C9orf3 [nearest(intronic) / rs7873567 [VEP_Medium: R2 (EAS:EUR=0.97:0.95)] / Pan-related <PAN_ABC (ductal; PAN_Nasser)> / Non_PAN_ABC (LIV; THY; ADR; Brain; Co)] / FBP1 [Pan-related <PAN_ABC (ductal; PAN_Nasser)> / Non_PAN_ABC (LIV; ADR)] / PCAT7 [Pan-related <PAN_ABC (PAN_Nasser)> / Non_PAN_ABC (LIV)] / FANCC [Non_PAN_ABC (ADR)] / SLC35D2 [Non_PAN_ABC (ADR)]
TA-meta-268	9:107675799 - 9:107775799	Cross	9:107725799:G:A	rs7045067	Primary	ABCA1(+35.3kb)	intergenic	0.07	17	0	0.638	--	0.25	-0.029	0.005	2.46e-08	0.195	-0.026	0.008	0.000728	0.295	-0.031	0.007	9.28e-06	ABCA1;FSD1L;SLC44A1;NIPSNAP3A;NIPSNAP3B	ABCA1	ABCA1 [nearest(intergenic) / Pan-related <PAN_ABC (PAN_Nasser)> / Non_PAN_ABC (Adp; LIV; MuSc; ADR; Brain; Co)] / FSD1L [Pan-related <PAN_ABC (PAN_Nasser)> / Non_PAN_ABC (LIV; MuSc; ADR; Brain)] / SLC44A1 [Pan-related <PAN_ABC (PAN_Nasser)> / Non_PAN_ABC (LIV; MuSc; ADR; Brain)] / NIPSNAP3A [Non_PAN_ABC (LIV; Brain)] / NIPSNAP3B [Non_PAN_ABC (LIV; Brain)]
TA-meta-269	9:125965103 - 9:126065103	Cross	9:126015103:G:T	rs2416899	Primary	STRBP	intronic	0.13	27	57.8	0.124	++	0.477	0.034	0.006	5.73e-10	0.257	0.028	0.007	6.91e-05	0.857	0.046	0.009	6.67e-07	RABGAP1;RC3H2;STRBP;ZBTB26;ZBTB6	RABGAP1	RABGAP1 [Very-Strongly-Pan-related <PAN_ABC (beta; PAN_Nasser)> / Non_PAN_ABC (Adp; LIV; MuSc; THY; ADR; Brain; SI; Co)] / RC3H2 [Very-Strongly-Pan-related <PAN_ABC (beta; PAN_Nasser)> / Non_PAN_ABC (Adp; LIV; MuSc; THY; ADR; Brain; SI; Co)] / STRBP [nearest(intronic) / Pan-related <PAN_ABC (PAN_Nasser)> / Non_PAN_ABC (LIV; Brain); Non_PAN_SMR <Pos_Exp (Brain)>] / ZBTB26 [Very-Strongly-Pan-relate…
TA-meta-270	9:126651651 - 9:126751651	Cross	9:126701651:G:A	rs2109921	Primary	DENND1A(+9.2kb)	intergenic	0.29	6	0	0.685	++	0.232	0.03	0.005	1.81e-08	0.168	0.028	0.008	0.000795	0.28	0.032	0.007	6.53e-06	DENND1A	DENND1A	DENND1A [nearest(intergenic) / Non_PAN_ABC (MuSc)]
TA-meta-271	9:129412901 - 9:129512901	Cross/EAS	9:129462901:C:T	rs3814119	Primary	LMX1B	3UTR	0.38	10	83.5	0.0137	--	0.404	-0.033	0.005	7.52e-10	0.128	-0.052	0.009	2.93e-08	0.54	-0.024	0.007	0.000291	LMX1B	LMX1B	LMX1B [nearest(3UTR)]
TA-meta-272	9:136099229 - 9:136199229	Cross/EAS/EUR	9:136149229:T:C	rs505922	Primary	SURF6(-48.3kb)	intergenic	0.28	9	0	0.659	--	0.389	0.045	0.004	1.33e-23	0.43	0.043	0.006	7.76e-13	0.337	0.047	0.007	3.65e-12	ABO;LCN1P1;SURF6	ABO	ABO [Pan-related <PAN_ABC (PAN_Nasser)> / Non_PAN_ABC (ADR; SI; Co); Non_PAN_SMR <Pos_Exp (Adp-Sub; Adp-Vis; LIV; MuSc; ADR; PIT; Blood) / Neg_Exp (Brain; Co)>] / LCN1P1 [Non_PAN_SMR <Pos_Exp (THY)>] / SURF6 [nearest(intergenic)]
TA-meta-273	9:139193334 - 9:139293334	Cross/EAS/EUR	9:139243334:A:T	rs28429551	Primary	GPSM1	intronic	1	1	91.3	0.00068	++	0.201	-0.09	0.007	3.42e-41	0.088	-0.123	0.012	7.66e-25	0.251	-0.074	0.008	8.78e-21	GPSM1;DNLZ;CARD9;DKFZP434A062;SNAPC4	GPSM1	GPSM1 [nearest(intronic) / rs60980157 [VEP_High: R2 (EAS:EUR=0.83:0.93)] / Very-Strongly-Pan-related <PAN_ABC (beta; PAN_Nasser)> / Non_PAN_ABC (ADR; Brain); Non_PAN_SMR <Neg_Exp (MuSc; THY; Brain)>] / DNLZ [Very-Strongly-Pan-related <PAN_ABC (beta; acinar; PAN_Nasser) / PAN-SMR (Pos_Exp)> / Non_PAN_ABC (Adp; ADR; Brain); Non_PAN_SMR <Pos_Exp (Adp-Sub; Adp-Vis; MuSc; THY; ADR; Brain; PIT; SI; Co;…
TA-meta-274	9:139193334 - 9:139293334	Cross/EAS/EUR	9:139244696:G:A	rs28734885	Secondary	GPSM1	intronic	NA	NA	62.2	0.104	--	0.139	-0.038	0.007	2.46e-08	0.143	-0.048	0.009	1.69e-07	0.134	-0.025	0.01	0.0112	DNLZ;CARD9;GPSM1;PMPCA;SDCCAG3	DNLZ	DNLZ [Very-Strongly-Pan-related <PAN_ABC (beta; PAN_Nasser) / PAN-SMR (Pos_Exp)> / Non_PAN_ABC (Adp); Non_PAN_SMR <Pos_Exp (Adp-Sub; Adp-Vis; MuSc; THY; ADR; Brain; PIT; SI; Co; Blood)>] / CARD9 [Pan-related <PAN_ABC (PAN_Nasser)> / Non_PAN_ABC (Adp); Non_PAN_SMR <Neg_Exp (Blood)>] / GPSM1 [nearest(intronic) / Pan-related <PAN_ABC (PAN_Nasser)> / Non_PAN_SMR <Neg_Exp (MuSc; THY; Brain)>] / PMPCA …
TA-meta-275	10:12257894 - 10:12357894	Cross/EAS/EUR	10:12307894:C:T	rs11257655	Primary	CDC123(+15.3kb)	intergenic	1	1	78.3	0.0317	++	0.382	0.099	0.005	5.62e-95	0.486	0.107	0.006	8.45e-68	0.217	0.086	0.008	1.45e-28	CDC123;NUDT5;CAMK1D;OPTN;SEC61A2	CDC123	CDC123 [nearest(intergenic) / Pan-related <PAN_ABC (PAN_Nasser)> / Non_PAN_SMR <Pos_Exp (Brain; Blood)>] / NUDT5 [Pan-related <PAN_ABC (PAN_Nasser)> / Non_PAN_SMR <Pos_Exp (MuSc; THY; Brain; PIT; Co; Blood)>] / CAMK1D [Pan-related <PAN_ABC (PAN_Nasser)>] / OPTN [Pan-related <PAN_ABC (PAN_Nasser)>] / SEC61A2 [Pan-related <PAN-SMR (Neg_Exp)> / Non_PAN_SMR <Pos_Exp (THY; Brain; PIT) / Neg_Exp (Adp-S…
TA-meta-276	10:12257894 - 10:12357894	Cross/EAS/EUR	10:12536490:C:T	rs11257830	Secondary	CAMK1D	intronic	NA	NA	8.6	0.295	++	0.287	0.034	0.006	7.01e-08	0.312	0.035	0.006	5.49e-08	0.024	0.012	0.021	0.566	CAMK1D;CDC123;RP11-186N15.3	CAMK1D	CAMK1D [nearest(intronic) / Non_PAN_SMR <Pos_Exp (Blood)>] / CDC123 [Non_PAN_SMR <Pos_Exp (Brain; Blood)>] / RP11-186N15.3 [Non_PAN_SMR <Pos_Exp (Blood)>]
TA-meta-277	10:13517440 - 10:13617440	Cross	10:13567440:G:A	rs4750374	Primary	BEND7	intronic	0.16	13	0	0.497	--	0.353	-0.03	0.005	2.05e-08	0.11	-0.024	0.01	0.0137	0.455	-0.032	0.006	3.61e-07	BEND7;PRPF18;SEPHS1;MCM10	PRPF18	BEND7 [nearest(intronic) / Non_PAN_ABC (LIV)] / PRPF18 [Very-Strongly-Pan-related <PAN_ABC (beta; alpha; PAN_Nasser)> / Non_PAN_ABC (LIV; MuSc; ADR)] / SEPHS1 [Very-Strongly-Pan-related <PAN_ABC (beta; alpha; PAN_Nasser)> / Non_PAN_ABC (LIV; ADR)] / MCM10 [Non_PAN_ABC (ADR)]
TA-meta-278	10:23437778 - 10:23537778	Cross/EAS	10:23487778:G:A	rs77065181	Primary	PTF1A(+4.6kb)	intergenic	0.05	62	0	0.477	+-	0.048	0.091	0.014	1.75e-10	0.048	0.092	0.014	1.33e-10	0	-0.291	0.538	0.589	PTF1A;ARMC3;C10orf67;MSRB2	PTF1A	PTF1A [nearest(intergenic) / rs370163562 [VEP_Low: R2 (EAS:EUR=0.54:1)] / Strongly-Pan-related <PAN_ABC (acinar; PAN_Nasser)>] / ARMC3 [Pan-related <PAN_ABC (PAN_Nasser)>] / C10orf67 [Pan-related <PAN_ABC (PAN_Nasser)> / Non_PAN_ABC (LIV; MuSc; Brain; Co)] / MSRB2 [Pan-related <PAN_ABC (PAN_Nasser)> / Non_PAN_ABC (Co)]
TA-meta-279	10:26441152 - 10:26541152	Cross	10:26491152:G:C	rs11014996	Primary	MYO3A	intronic	0.23	23	0	0.635	--	0.278	-0.032	0.005	7.93e-10	0.346	-0.034	0.006	1.28e-07	0.144	-0.029	0.009	0.00145	GAD2;MYO3A	GAD2	GAD2 [Very-Strongly-Pan-related <PAN_ABC (beta; alpha; PAN_Nasser)> / Non_PAN_ABC (Brain)] / MYO3A [nearest(intronic)]
TA-meta-280	10:33958370 - 10:34058370	Cross	10:34008370:G:T	rs12780169	Primary	NRP1(+383.2kb)	intergenic	0.39	13	0	0.433	++	0.188	0.035	0.006	4.91e-09	0.228	0.032	0.007	6.44e-06	0.088	0.043	0.011	0.000149	LINC00838;NRP1	NRP1	LINC00838 [Non_PAN_ABC (MuSc)] / NRP1 [nearest(intergenic)]
TA-meta-281	10:63667113 - 10:63767113	Cross/EAS	10:63717113:C:T	rs146716733	Primary	ARID5B	intronic	0.51	7	0	0.368	--	0.109	-0.047	0.008	6.88e-10	0.131	-0.051	0.009	1.02e-08	0.054	-0.036	0.014	0.0118	ARID5B	ARID5B	ARID5B [nearest(intronic) / Non_PAN_ABC (Adp; LIV)]
TA-meta-282	10:64833316 - 10:64933316	Cross/EAS	10:64883316:A:G	rs4406711	Primary	NRBF2(-9.7kb)	intergenic	0.21	10	0	0.395	++	0.177	-0.061	0.007	1.95e-17	0.2	-0.059	0.008	2.59e-14	0.028	-0.076	0.02	9.54e-05	JMJD1C;JMJD1C-AS1;NRBF2;REEP3;ARID5B	JMJD1C	JMJD1C [rs41274074 [VEP_Medium: R2 (EAS:EUR=0.87:0.99)] / Very-Strongly-Pan-related <PAN_ABC (beta; alpha; acinar; ductal; PAN_Nasser)> / Non_PAN_ABC (Adp; LIV; MuSc; ADR; Brain; SI; Co)] / JMJD1C-AS1 [Very-Strongly-Pan-related <PAN_ABC (beta; alpha; acinar; ductal; PAN_Nasser)> / Non_PAN_ABC (Adp; LIV; MuSc; ADR; Brain; SI; Co)] / NRBF2 [nearest(intergenic) / Pan-related <PAN_ABC (PAN_Nasser)> /…
TA-meta-283	10:70296740 - 10:70396740	Cross	10:70346740:C:T	rs2298117	Primary	TET1	intronic	0.06	32	0	0.616	++	0.448	0.025	0.004	1.19e-08	0.447	0.023	0.006	0.000133	0.449	0.027	0.006	1.92e-05	TET1;CCAR1;DNA2;SLC25A16;RUFY2	TET1	TET1 [nearest(intronic) / Pan-related <PAN_ABC (PAN_Nasser)> / Non_PAN_ABC (MuSc; Brain); Non_PAN_SMR <Pos_Exp (Brain)>] / CCAR1 [Pan-related <PAN_ABC (PAN_Nasser)> / Non_PAN_ABC (MuSc; Brain)] / DNA2 [Pan-related <PAN_ABC (PAN_Nasser)> / Non_PAN_ABC (MuSc; Brain)] / SLC25A16 [Pan-related <PAN_ABC (PAN_Nasser)> / Non_PAN_ABC (MuSc; Brain)] / RUFY2 [Non_PAN_ABC (Brain)]
TA-meta-284	10:71271279 - 10:71371279	Cross/EAS/EUR	10:71321279:G:A	rs177045	Primary	NEUROG3(-10.2kb)	intergenic	0.81	3	9.1	0.294	--	0.51	-0.045	0.005	8.13e-22	0.366	-0.04	0.006	2.03e-10	0.683	-0.05	0.007	4.64e-13	NEUROG3	NEUROG3	NEUROG3 [nearest(intergenic) / rs4536103 [VEP_Low: R2 (EAS:EUR=0.49:0.84)]]
TA-meta-285	10:71271279 - 10:71371279	Cross/EAS/EUR	10:71464834:C:A	rs1381937	Secondary	C10orf35(+71.5kb)	intergenic	NA	NA	76.2	0.0403	++	0.463	0.035	0.005	3.15e-14	0.464	0.025	0.007	0.00017	0.462	0.044	0.006	4.5e-12	C10orf35	C10orf35	C10orf35 [nearest(intergenic)]
TA-meta-286	10:71271279 - 10:71371279	Cross/EAS/EUR	10:71273357:G:A	rs1955163	Secondary	TSPAN15(+5.9kb)	intergenic	NA	NA	54	0.141	--	0.369	-0.035	0.005	1.06e-10	0.452	-0.039	0.006	1.86e-10	0.091	-0.02	0.011	0.0728	TSPAN15	TSPAN15	TSPAN15 [nearest(intergenic)]
TA-meta-287	10:71271279 - 10:71371279	Cross/EAS/EUR	10:71307920:G:A	rs297049	Secondary	NEUROG3(-23.5kb)	intergenic	NA	NA	0	0.81	--	0.106	-0.059	0.007	1.47e-15	0.125	-0.061	0.009	3.25e-11	0.068	-0.057	0.013	1.03e-05	NEUROG3	NEUROG3	NEUROG3 [nearest(intergenic)]
TA-meta-288	10:71271279 - 10:71371279	Cross/EAS/EUR	10:71426938:A:C	rs9783205	Secondary	C10orf35(+33.6kb)	intergenic	NA	NA	0	0.342	--	0.158	0.039	0.006	2.79e-10	0.107	0.046	0.01	1.8e-06	0.194	0.034	0.008	2.1e-05	C10orf35;COL13A1;H2AFY2;AIFM2;SRGN	C10orf35	C10orf35 [nearest(intergenic) / Pan-related <PAN_ABC (ductal; PAN_Nasser)> / Non_PAN_ABC (LIV; SI; Co)] / COL13A1 [Pan-related <PAN_ABC (PAN_Nasser)> / Non_PAN_ABC (Co)] / H2AFY2 [Pan-related <PAN_ABC (PAN_Nasser)> / Non_PAN_ABC (SI)] / AIFM2 [Non_PAN_ABC (SI)] / SRGN [Non_PAN_ABC (SI)]
TA-meta-289	10:75454029 - 10:75554029	Cross	10:75504029:T:A	rs7080579	Primary	SEC24C	upstream	0.06	17	54.6	0.138	++	0.425	0.032	0.005	1.61e-09	0.123	0.043	0.009	2.57e-06	0.579	0.026	0.006	5.09e-05	BMS1P4;FUT11;SEC24C;CHCHD1;ZSWIM8	SEC24C	BMS1P4 [Very-Strongly-Pan-related <PAN_ABC (beta; alpha; ductal; PAN_Nasser)> / Non_PAN_ABC (Adp; LIV; MuSc; THY; ADR; Brain; SI; Co); Non_PAN_SMR <Pos_Exp (Adp-Sub; Co) / Neg_Exp (Brain)>] / FUT11 [Very-Strongly-Pan-related <PAN_ABC (beta; alpha; acinar; ductal; PAN_Nasser)> / Non_PAN_ABC (Adp; LIV; MuSc; THY; ADR; Brain; SI; Co); Non_PAN_SMR <Neg_Exp (Brain)>] / SEC24C [nearest(upstream) / Very…
TA-meta-290	10:77183813 - 10:77283813	Cross/EAS	10:77233813:C:T	rs2043089	Primary	ZNF503(+72.1kb)	intergenic	0.2	5	0	0.49	++	0.206	0.042	0.006	6.27e-13	0.252	0.039	0.007	5.71e-08	0.12	0.047	0.01	1.62e-06	C10orf11;ZNF503;AC010997.6;ZNF503-AS2	ZNF503	C10orf11 [Pan-related <PAN-SMR (Neg_Exp)> / Non_PAN_SMR <Neg_Exp (Adp-Sub; Adp-Vis; THY; ADR; Co)>] / ZNF503 [nearest(intergenic) / Non_PAN_SMR <Pos_Exp (Blood)>] / AC010997.6 [Non_PAN_SMR <Pos_Exp (Brain)>] / ZNF503-AS2 [Non_PAN_SMR <Pos_Exp (Blood)>]
TA-meta-291	10:80893841 - 10:80993841	Cross/EAS/EUR	10:80943841:G:A	rs703980	Primary	ZMIZ1	intronic	0.17	6	25.1	0.248	--	0.446	-0.064	0.004	4.1e-47	0.431	-0.059	0.006	2.13e-22	0.464	-0.07	0.006	8.06e-27	ZMIZ1	ZMIZ1	ZMIZ1 [nearest(intronic)]
TA-meta-292	10:88067318 - 10:88167318	Cross	10:88117318:A:C	rs11201992	Primary	GRID1	intronic	0.2	14	63.2	0.0991	--	0.414	0.027	0.005	9.29e-09	0.275	0.019	0.007	0.006	0.537	0.034	0.006	1.02e-07	GRID1	GRID1	GRID1 [nearest(intronic) / Pan-related <PAN_ABC (PAN_Nasser)> / Non_PAN_ABC (Adp; LIV; MuSc; THY; ADR; Brain; Co)]
TA-meta-293	10:89719340 - 10:89819340	Cross/EAS	10:89769340:C:T	rs11202627	Primary	PTEN(+37.7kb)	intergenic	0.23	34	0	0.439	++	0.306	0.044	0.005	2.95e-17	0.383	0.046	0.006	1.13e-13	0.15	0.038	0.009	2.56e-05	PTEN;ATAD1;MINPP1;PAPSS2;RNLS	PTEN	PTEN [nearest(intergenic) / Very-Strongly-Pan-related <PAN_ABC (beta; alpha; PAN_Nasser)> / Non_PAN_ABC (LIV; MuSc; Brain); Non_PAN_SMR <Pos_Exp (Brain)>] / ATAD1 [Very-Strongly-Pan-related <PAN_ABC (beta; alpha; PAN_Nasser)> / Non_PAN_ABC (MuSc; Brain)] / MINPP1 [Very-Strongly-Pan-related <PAN_ABC (beta; alpha; PAN_Nasser)> / Non_PAN_ABC (MuSc; Brain)] / PAPSS2 [Very-Strongly-Pan-related <PAN_AB…
TA-meta-294	10:94410650 - 10:94510650	Cross/EAS/EUR	10:94460650:C:T	rs10882099	Primary	HHEX(+5.2kb)	intergenic	1	1	0	0.579	++	0.44	0.112	0.005	2.87e-131	0.293	0.115	0.006	6.33e-70	0.588	0.11	0.006	7.73e-64	HHEX;EIF2S2P3;IDE;KIF11;MARK2P9	HHEX	HHEX [nearest(intergenic) / Non_PAN_SMR <Pos_Exp (Blood)>] / EIF2S2P3 [Non_PAN_SMR <Neg_Exp (THY; PIT; Co) / Both_Exp (Adp-Sub; Blood)>] / IDE [Non_PAN_SMR <Pos_Exp (Blood)>] / KIF11 [Non_PAN_SMR <Neg_Exp (Blood)>] / MARK2P9 [Non_PAN_SMR <Pos_Exp (THY; Brain)>]
TA-meta-295	10:94410650 - 10:94510650	Cross/EAS/EUR	10:94742239:A:T	rs12098801	Secondary	EXOC6	intronic	NA	NA	0	0.913	--	0.034	0.156	0.017	1.56e-20	0.034	0.157	0.017	2.07e-20	0.001	0.134	0.203	0.509	EXOC6;HHEX	EXOC6	EXOC6 [nearest(intronic)] / HHEX [Non_PAN_SMR <Pos_Exp (Blood)>]
TA-meta-296	10:94410650 - 10:94510650	Cross/EAS/EUR	10:94479107:G:A	rs1112718	Secondary	HHEX(+23.7kb)	intergenic	NA	NA	81.7	0.0193	++	0.428	0.116	0.005	1.67e-116	0.161	0.131	0.008	4.1e-59	0.6	0.107	0.006	8.09e-61	HHEX;EIF2S2P3;IDE;KIF11;MARK2P9	HHEX	HHEX [nearest(intergenic) / Non_PAN_SMR <Pos_Exp (Blood)>] / EIF2S2P3 [Non_PAN_SMR <Neg_Exp (THY; PIT; Co) / Both_Exp (Adp-Sub; Blood)>] / IDE [Non_PAN_SMR <Pos_Exp (Blood)>] / KIF11 [Non_PAN_SMR <Neg_Exp (Blood)>] / MARK2P9 [Non_PAN_SMR <Pos_Exp (Brain)>]
TA-meta-297	10:94410650 - 10:94510650	Cross/EAS/EUR	10:94146269:A:G	rs1810811	Secondary	MARCH5(+32.5kb)	intergenic	NA	NA	0	0.395	--	0.476	0.046	0.005	1.78e-22	0.315	0.05	0.007	5.46e-14	0.641	0.042	0.007	4.43e-10	MARCH5;CPEB3;EIF2S2P3;IDE;KIF11	MARCH5	MARCH5 [nearest(intergenic) / Non_PAN_SMR <Pos_Exp (Co; Blood)>] / CPEB3 [Non_PAN_SMR <Neg_Exp (Blood)>] / EIF2S2P3 [Non_PAN_SMR <Neg_Exp (THY; PIT; Co) / Both_Exp (Adp-Sub; Blood)>] / IDE [Non_PAN_SMR <Pos_Exp (Blood)>] / KIF11 [Non_PAN_SMR <Neg_Exp (Blood)>]
TA-meta-298	10:94410650 - 10:94510650	Cross/EAS/EUR	10:94643656:C:A	rs11816241	Secondary	EXOC6	intronic	NA	NA	90.1	0.00144	++	0.212	0.036	0.006	3.46e-09	0.093	0.066	0.011	3.16e-09	0.265	0.023	0.007	0.00172	EXOC6;CEP55;EIF2S2P3;IDE;MYOF	EXOC6	EXOC6 [nearest(intronic) / Non_PAN_ABC (Brain)] / CEP55 [Non_PAN_ABC (Brain)] / EIF2S2P3 [Non_PAN_SMR <Neg_Exp (THY; PIT; Co) / Both_Exp (Adp-Sub; Blood)>] / IDE [Non_PAN_ABC (Brain)] / MYOF [Non_PAN_ABC (Brain)]
TA-meta-299	10:98938759 - 10:99038759	Cross/EAS	10:98988759:C:A	rs1468069	Primary	ARHGAP19:ARHGAP19-SLIT1	intronic:intronic	0.06	51	23.9	0.252	++	0.331	0.038	0.005	2.6e-16	0.312	0.043	0.006	2.64e-11	0.352	0.033	0.007	1.06e-06	FRAT1;FRAT2;ARHGAP19;PGAM1;RRP12	FRAT1	FRAT1 [Very-Strongly-Pan-related <PAN_ABC (beta; acinar; ductal; PAN_Nasser)> / Non_PAN_ABC (Adp; LIV; MuSc; THY; ADR; Brain; SI; Co); Non_PAN_SMR <Pos_Exp (Brain) / Neg_Exp (Blood)>] / FRAT2 [Very-Strongly-Pan-related <PAN_ABC (beta; acinar; ductal; PAN_Nasser)> / Non_PAN_ABC (Adp; LIV; MuSc; THY; ADR; Brain; SI; Co); Non_PAN_SMR <Pos_Exp (Brain) / Neg_Exp (Blood)>] / ARHGAP19 [nearest(intronic:…
TA-meta-300	10:101874418 - 10:101974418	Cross	10:101924418:T:C	rs10883451	Primary	ERLIN1	intronic	0.53	21	30.5	0.23	++	0.403	-0.035	0.006	1.92e-09	0.055	-0.049	0.013	0.000236	0.484	-0.031	0.006	9.55e-07	BLOC1S2;CWF19L1;ERLIN1;CPN1;PHBP9	CWF19L1	BLOC1S2 [Pan-related <PAN_ABC (PAN_Nasser)> / Non_PAN_ABC (Adp; MuSc; ADR; Brain); Non_PAN_SMR <Neg_Exp (Blood)>] / CWF19L1 [Strongly-Pan-related <PAN_ABC (ductal; PAN_Nasser) / PAN-SMR (Neg_Exp)> / Non_PAN_ABC (Adp; LIV; MuSc; THY; ADR; Brain; SI; Co); Non_PAN_SMR <Neg_Exp (Adp-Sub; Adp-Vis; LIV; MuSc; THY; ADR; Brain; PIT; SI; Co; Blood)>] / ERLIN1 [nearest(intronic)] / CPN1 [Non_PAN_ABC (LIV)]…
TA-meta-301	10:101874418 - 10:101974418	Cross	10:102420598:T:G	rs61607357	Secondary	PAX2(-74.8kb)	intergenic	NA	NA	66.7	0.083	--	0.432	0.025	0.004	2.58e-08	0.466	0.018	0.006	0.00398	0.394	0.034	0.007	3.8e-07	PAX2	PAX2	PAX2 [nearest(intergenic)]
TA-meta-302	10:103221262 - 10:103321262	Cross	10:103271262:G:A	rs9420848	Primary	BTRC	intronic	0.03	42	52.7	0.146	--	0.305	-0.029	0.005	7.36e-09	0.169	-0.038	0.008	1.91e-06	0.393	-0.023	0.006	0.000313	BTRC;DPCD;POLL	DPCD	BTRC [nearest(intronic) / Pan-related <PAN_ABC (PAN_Nasser)> / Non_PAN_ABC (Adp; LIV; MuSc; Brain; SI; Co)] / DPCD [Very-Strongly-Pan-related <PAN_ABC (beta; acinar; PAN_Nasser)>] / POLL [Very-Strongly-Pan-related <PAN_ABC (beta; PAN_Nasser)>]
TA-meta-303	10:112628657 - 10:112728657	Cross/EAS	10:112678657:T:G	rs7895872	Primary	BBIP1	5UTR	0.36	6	0	0.419	++	0.356	-0.038	0.005	6.61e-16	0.425	-0.041	0.006	1.46e-11	0.251	-0.033	0.007	9.03e-06	BBIP1;DCLRE1A;HABP2;VTI1A;ZDHHC6	BBIP1	BBIP1 [nearest(5UTR) / Very-Strongly-Pan-related <PAN_ABC (beta; alpha; acinar; ductal; PAN_Nasser)> / Non_PAN_ABC (Adp; LIV; MuSc; THY; ADR; Brain; SI; Co)] / DCLRE1A [Very-Strongly-Pan-related <PAN_ABC (beta)> / Non_PAN_ABC (Adp; LIV; MuSc; ADR; Brain)] / HABP2 [Strongly-Pan-related <PAN_ABC (acinar; ductal)> / Non_PAN_ABC (MuSc)] / VTI1A [Strongly-Pan-related <PAN_ABC (acinar; ductal; PAN_Nass…
TA-meta-304	10:114708349 - 10:114808349	Cross/EAS/EUR	10:114758349:C:T	rs7903146	Primary	TCF7L2	intronic	1	1	86.5	0.00654	++	0.247	0.306	0.006	< 1.0e-300	0.037	0.268	0.015	9.55e-68	0.291	0.314	0.007	< 1.0e-300	TCF7L2	TCF7L2	TCF7L2 [nearest(intronic)]
TA-meta-305	10:114708349 - 10:114808349	Cross/EAS/EUR	10:114712154:C:G	rs7094871	Secondary	TCF7L2	intronic	NA	NA	96.2	2.96e-07	+-	0.465	-0.016	0.004	0.000509	0.392	-0.038	0.006	1.19e-09	0.542	0.008	0.006	0.206	TCF7L2;ACSL5;HABP2;VTI1A;ZDHHC6	TCF7L2	TCF7L2 [nearest(intronic) / Pan-related <PAN_ABC (PAN_Nasser)> / Non_PAN_ABC (Adp; LIV; MuSc; THY; ADR; Brain; SI; Co)] / ACSL5 [Pan-related <PAN_ABC (PAN_Nasser)> / Non_PAN_ABC (Brain; Co)] / HABP2 [Pan-related <PAN_ABC (PAN_Nasser)> / Non_PAN_ABC (LIV)] / VTI1A [Pan-related <PAN_ABC (PAN_Nasser)> / Non_PAN_ABC (LIV; MuSc; ADR; Brain; Co)] / ZDHHC6 [Pan-related <PAN_ABC (PAN_Nasser)> / Non_PAN_A…
TA-meta-306	10:114708349 - 10:114808349	Cross/EAS/EUR	10:114599035:C:G	rs17746147	Secondary	VTI1A(+20.5kb)	intergenic	NA	NA	0	0.707	--	0.213	0.071	0.008	7.94e-20	0.01	0.052	0.051	0.302	0.218	0.072	0.008	7.66e-20	TCF7L2;VTI1A	VTI1A	TCF7L2 [Non_PAN_ABC (LIV)] / VTI1A [nearest(intergenic)]
TA-meta-307	10:114708349 - 10:114808349	Cross/EAS/EUR	10:114540596:G:A	rs12358766	Secondary	VTI1A	intronic	NA	NA	0	0.786	++	0.369	0.02	0.005	1.23e-05	0.403	0.019	0.006	0.00246	0.329	0.021	0.007	0.00166	VTI1A	VTI1A	VTI1A [nearest(intronic)]
TA-meta-308	10:114708349 - 10:114808349	Cross/EAS/EUR	10:114050655:T:A	rs74158712	Secondary	TECTB	intronic	NA	NA	0	0.413	--	0.039	-0.037	0.014	0.00981	0.012	-0.063	0.035	0.0704	0.044	-0.032	0.016	0.0436	TECTB	TECTB	TECTB [nearest(intronic) / Non_PAN_ABC (Adp)]
TA-meta-309	10:115740005 - 10:115840005	Cross	10:115790005:C:T	rs10787515	Primary	ADRB1(-13.8kb)	intergenic	0.28	5	65.1	0.0905	++	0.444	0.024	0.004	4.97e-08	0.373	0.017	0.006	0.00703	0.517	0.032	0.006	4.62e-07	ADRB1	ADRB1	ADRB1 [nearest(intergenic) / Non_PAN_ABC (Co); Non_PAN_SMR <Neg_Exp (Brain)>]
TA-meta-310	10:122865345 - 10:122965345	Cross/EAS	10:122915345:G:A	rs72631105	Primary	WDR11(+246.3kb)	intergenic	0.99	1	64.8	0.0918	++	0.267	0.053	0.005	2.68e-23	0.317	0.06	0.007	3.42e-18	0.196	0.042	0.008	3.82e-07	WDR11	WDR11	WDR11 [nearest(intergenic)]
TA-meta-311	10:122865345 - 10:122965345	Cross/EAS	10:122987289:C:T	rs1907233	Secondary	FGFR2(-250.6kb)	intergenic	NA	NA	87.7	0.00436	--	0.434	-0.035	0.004	8.76e-15	0.32	-0.048	0.006	9.73e-14	0.547	-0.022	0.006	0.000509	FGFR2	FGFR2	FGFR2 [nearest(intergenic)]
TA-meta-312	10:122865345 - 10:122965345	Cross/EAS	10:122834572:G:T	rs11199753	Secondary	WDR11(+165.5kb)	intergenic	NA	NA	26.6	0.243	--	0.158	-0.045	0.006	1.5e-12	0.188	-0.051	0.008	2.41e-10	0.106	-0.035	0.011	0.000844	WDR11	WDR11	WDR11 [nearest(intergenic)]
TA-meta-313	10:124122912 - 10:124222912	Cross/EAS/EUR	10:124172912:G:A	rs7908662	Primary	PLEKHA1	intronic	0.05	18	0	0.524	++	0.458	0.046	0.005	8.49e-23	0.398	0.042	0.007	2.1e-10	0.512	0.048	0.006	3.96e-14	PLEKHA1;CUZD1;HTRA1;WDR11;WDR11-AS1	PLEKHA1	PLEKHA1 [nearest(intronic) / Very-Strongly-Pan-related <PAN_ABC (beta; alpha; acinar; ductal; PAN_Nasser)> / Non_PAN_ABC (LIV; MuSc; THY; ADR; Brain; SI; Co); Non_PAN_SMR <Pos_Exp (MuSc; Brain; Co) / Neg_Exp (Adp-Sub; Adp-Vis; Blood)>] / CUZD1 [Strongly-Pan-related <PAN_ABC (acinar)>] / HTRA1 [Very-Strongly-Pan-related <PAN_ABC (beta; alpha; ductal; PAN_Nasser)> / Non_PAN_ABC (LIV; MuSc; THY; Bra…
TA-meta-314	10:125151772 - 10:125251772	Cross/EAS	10:125201772:A:G	rs11248529	Primary	GPR26(-224.1kb)	intergenic	0.44	29	59	0.118	++	0.29	-0.034	0.006	1.49e-08	0.336	-0.038	0.006	5.8e-09	0.051	-0.012	0.015	0.404	GPR26	GPR26	GPR26 [nearest(intergenic)]
TA-meta-315	11:2808546 - 11:2908546	Cross/EAS/EUR	11:2858546:C:T	rs2237897	Primary	KCNQ1	intronic	1	1	85.4	0.00894	--	0.321	-0.233	0.006	< 1.0e-300	0.365	-0.239	0.007	3.51e-289	0.046	-0.192	0.017	6.79e-31	KCNQ1;CDKN1C;KCNQ1OT1	KCNQ1	KCNQ1 [nearest(intronic) / Non_PAN_SMR <Neg_Exp (Blood)>] / CDKN1C [Non_PAN_SMR <Neg_Exp (Blood)>] / KCNQ1OT1 [Non_PAN_SMR <Pos_Exp (THY) / Neg_Exp (Brain)>]
TA-meta-319	11:2808546 - 11:2908546	Cross/EAS/EUR	11:2382321:C:T	rs7106800	Secondary	CD81(-15.1kb)	intergenic	NA	NA	2.6	0.311	++	0.492	0.029	0.005	2.16e-08	0.273	0.033	0.007	1.2e-06	0.758	0.023	0.008	0.00274	TH;TRPM5;CD81;KCNQ1;KCNQ1OT1	TH	TH [Pan-related <PAN-SMR (Neg_Exp)>] / TRPM5 [Pan-related <PAN-SMR (Neg_Exp)>] / CD81 [nearest(intergenic)] / KCNQ1 [Non_PAN_SMR <Neg_Exp (Blood)>] / KCNQ1OT1 [Non_PAN_SMR <Pos_Exp (THY) / Neg_Exp (Brain)>]
TA-meta-320	11:2808546 - 11:2908546	Cross/EAS/EUR	11:1997115:C:T	rs77345512	Secondary	MRPL23	intronic	NA	NA	71	0.0633	+-	0.12	0.028	0.009	0.00325	0.131	0.033	0.01	0.00078	0.013	-0.028	0.032	0.372	MRPL23;TH	MRPL23	MRPL23 [nearest(intronic)] / TH [Pan-related <PAN-SMR (Neg_Exp)>]
TA-meta-322	11:2808546 - 11:2908546	Cross/EAS/EUR	11:2015569:C:G	rs217231	Secondary	MRPL23(+9.8kb)	intergenic	NA	NA	55.2	0.135	+-	0.411	0.005	0.005	0.355	0.484	-0.002	0.007	0.738	0.325	0.013	0.007	0.0856	TH;MRPL23;CHID1;MRPL23-AS1;TNNT3	TH	TH [Pan-related <PAN-SMR (Neg_Exp)> / Non_PAN_ABC (ADR)] / MRPL23 [nearest(intergenic) / Non_PAN_ABC (LIV; MuSc; ADR)] / CHID1 [Non_PAN_ABC (ADR)] / MRPL23-AS1 [Non_PAN_ABC (LIV; MuSc; ADR)] / TNNT3 [Non_PAN_ABC (LIV; MuSc)]
TA-meta-323	11:2808546 - 11:2908546	Cross/EAS/EUR	11:1703564:T:C	rs4417225	Secondary	KRTAP5-6(-14.9kb)	intergenic	NA	NA	73.6	0.0515	++	0.419	-0.025	0.005	4.64e-07	0.197	-0.014	0.008	0.0755	0.577	-0.034	0.007	3.24e-07	KRTAP5-6;LSP1;SYT8;TNNI2;FAM99B	KRTAP5-6	KRTAP5-6 [nearest(intergenic) / Pan-related <PAN_ABC (PAN_Nasser)> / Non_PAN_ABC (ADR; Co)] / LSP1 [Pan-related <PAN_ABC (PAN_Nasser)>] / SYT8 [Pan-related <PAN_ABC (PAN_Nasser)> / Non_PAN_ABC (LIV; Brain)] / TNNI2 [Pan-related <PAN_ABC (PAN_Nasser)>] / FAM99B [Non_PAN_ABC (LIV)]
TA-meta-325	11:2808546 - 11:2908546	Cross/EAS/EUR	11:2197286:G:A	rs4929965	Secondary	TH(+4.2kb)	intergenic	NA	NA	78.2	0.0321	++	0.299	0.074	0.006	1.07e-37	0.08	0.095	0.011	1.91e-17	0.381	0.067	0.007	9.67e-23	INS;INS-IGF2;TH;TRPM5	INS	INS [Very-Strongly-Pan-related <PAN_ABC (beta; ductal)>] / INS-IGF2 [Very-Strongly-Pan-related <PAN_ABC (beta)>] / TH [nearest(intergenic) / Pan-related <PAN-SMR (Neg_Exp)>] / TRPM5 [Pan-related <PAN-SMR (Neg_Exp)>]
TA-meta-329	11:2808546 - 11:2908546	Cross/EAS/EUR	11:2288412:C:T	rs10831668	Secondary	ASCL2(-1.3kb)	intergenic	NA	NA	0	0.757	++	0.038	0.094	0.013	4.9e-13	0.045	0.091	0.015	1.17e-09	0.017	0.1	0.026	8.94e-05	ASCL2;TH;TRPM5;INS	ASCL2	ASCL2 [nearest(intergenic) / Non_PAN_ABC (LIV; SI)] / TH [Pan-related <PAN-SMR (Neg_Exp)>] / TRPM5 [Pan-related <PAN-SMR (Neg_Exp)>] / INS [NA]
TA-meta-331	11:2808546 - 11:2908546	Cross/EAS/EUR	11:2254561:G:A	rs118082997	Secondary	ASCL2(-35.2kb)	intergenic	NA	NA	2.5	0.311	++	0.03	0.118	0.016	1.89e-13	0.034	0.124	0.017	7.03e-13	0.007	0.078	0.042	0.0638	TH;TRPM5;ASCL2	TH	TH [Pan-related <PAN-SMR (Neg_Exp)>] / TRPM5 [Pan-related <PAN-SMR (Neg_Exp)>] / ASCL2 [nearest(intergenic)]
TA-meta-316	11:2808546 - 11:2908546	Cross/EAS/EUR	11:2857194:A:C	rs2237895	Secondary	KCNQ1	intronic	NA	NA	99.2	6.93e-30	--	0.384	0.143	0.005	1.11e-212	0.344	0.194	0.006	2.56e-200	0.427	0.089	0.007	1.15e-41	KCNQ1;CDKN1C;KCNQ1OT1	KCNQ1	KCNQ1 [nearest(intronic) / Non_PAN_SMR <Neg_Exp (Blood)>] / CDKN1C [Non_PAN_SMR <Neg_Exp (Blood)>] / KCNQ1OT1 [Non_PAN_SMR <Pos_Exp (THY) / Neg_Exp (Brain)>]
TA-meta-317	11:2808546 - 11:2908546	Cross/EAS/EUR	11:2579163:A:G	rs2283164	Secondary	KCNQ1	intronic	NA	NA	45.5	0.175	++	0.05	-0.084	0.011	2.6e-14	0.047	-0.1	0.016	5.26e-10	0.053	-0.07	0.015	3.55e-06	KCNQ1;TRPM5;KCNQ1OT1	KCNQ1	KCNQ1 [nearest(intronic) / Non_PAN_SMR <Neg_Exp (Blood)>] / TRPM5 [Pan-related <PAN-SMR (Neg_Exp)>] / KCNQ1OT1 [Non_PAN_SMR <Pos_Exp (THY) / Neg_Exp (Brain)>]
TA-meta-318	11:2808546 - 11:2908546	Cross/EAS/EUR	11:2839188:T:C	rs12284372	Secondary	KCNQ1	intronic	NA	NA	97.1	3.79e-09	--	0.154	0.034	0.007	3.14e-06	0.043	0.111	0.015	1.39e-13	0.189	0.01	0.008	0.242	KCNQ1;CDKN1C;KCNQ1OT1	KCNQ1	KCNQ1 [nearest(intronic) / Non_PAN_SMR <Neg_Exp (Blood)>] / CDKN1C [Non_PAN_SMR <Neg_Exp (Blood)>] / KCNQ1OT1 [Non_PAN_SMR <Pos_Exp (THY) / Neg_Exp (Brain)>]
TA-meta-321	11:2808546 - 11:2908546	Cross/EAS/EUR	11:2497101:C:T	rs2015013	Secondary	KCNQ1	intronic	NA	NA	87.4	0.00484	++	0.488	0.029	0.005	3.34e-10	0.382	0.041	0.006	9.64e-11	0.598	0.016	0.006	0.0163	KCNQ1;TRPM5;KCNQ1OT1	KCNQ1	KCNQ1 [nearest(intronic) / Non_PAN_SMR <Neg_Exp (Blood)>] / TRPM5 [Pan-related <PAN-SMR (Neg_Exp)>] / KCNQ1OT1 [Non_PAN_SMR <Pos_Exp (THY) / Neg_Exp (Brain)>]
TA-meta-324	11:2808546 - 11:2908546	Cross/EAS/EUR	11:2691471:G:A	rs231362	Secondary	KCNQ1	intronic	NA	NA	86.7	0.00619	--	0.366	-0.062	0.005	6.69e-29	0.104	-0.084	0.01	2.63e-17	0.48	-0.052	0.007	5.84e-15	KCNQ1;TRPM5;CDKN1C;KCNQ1OT1	KCNQ1	KCNQ1 [nearest(intronic) / Non_PAN_SMR <Neg_Exp (Blood)>] / TRPM5 [Pan-related <PAN-SMR (Neg_Exp)>] / CDKN1C [Non_PAN_SMR <Neg_Exp (Blood)>] / KCNQ1OT1 [Non_PAN_SMR <Pos_Exp (THY) / Neg_Exp (Brain)>]
TA-meta-326	11:2808546 - 11:2908546	Cross/EAS/EUR	11:2637919:A:T	rs79748283	Secondary	KCNQ1	intronic	NA	NA	81.8	0.0189	+-	0.096	-0.118	0.01	3.23e-30	0.098	-0.122	0.011	4.17e-31	0.021	0.018	0.059	0.762	KCNQ1;TRPM5;CDKN1C;KCNQ1OT1	KCNQ1	KCNQ1 [nearest(intronic) / Non_PAN_SMR <Neg_Exp (Blood)>] / TRPM5 [Pan-related <PAN-SMR (Neg_Exp)>] / CDKN1C [Non_PAN_SMR <Neg_Exp (Blood)>] / KCNQ1OT1 [Non_PAN_SMR <Pos_Exp (THY) / Neg_Exp (Brain)>]
TA-meta-327	11:2808546 - 11:2908546	Cross/EAS/EUR	11:2799679:T:C	rs2237884	Secondary	KCNQ1	intronic	NA	NA	59.7	0.115	++	0.345	-0.03	0.005	3.73e-10	0.402	-0.024	0.006	0.000246	0.27	-0.039	0.007	1.2e-07	CDKN1C;KCNQ1;KCNQ1OT1	CDKN1C	CDKN1C [Very-Strongly-Pan-related <PAN_ABC (beta; alpha; PAN_Nasser)> / Non_PAN_SMR <Neg_Exp (Blood)>] / KCNQ1 [nearest(intronic) / Non_PAN_SMR <Neg_Exp (Blood)>] / KCNQ1OT1 [Pan-related <PAN_ABC (PAN_Nasser)> / Non_PAN_SMR <Pos_Exp (THY) / Neg_Exp (Brain)>]
TA-meta-328	11:2808546 - 11:2908546	Cross/EAS/EUR	11:2556970:T:C	rs3782063	Secondary	KCNQ1	intronic	NA	NA	0	0.367	--	0.575	0.026	0.005	1.13e-07	0.465	0.03	0.007	5.44e-06	0.709	0.021	0.007	0.00399	KCNQ1;KCNQ1OT1;TRPM5;C11orf21;TSSC4	KCNQ1	KCNQ1 [nearest(intronic) / Non_PAN_ABC (Co); Non_PAN_SMR <Neg_Exp (Blood)>] / KCNQ1OT1 [Non_PAN_ABC (Co); Non_PAN_SMR <Pos_Exp (THY) / Neg_Exp (Brain)>] / TRPM5 [Pan-related <PAN-SMR (Neg_Exp)>] / C11orf21 [Non_PAN_ABC (Co)] / TSSC4 [Non_PAN_ABC (Co)]
TA-meta-330	11:2808546 - 11:2908546	Cross/EAS/EUR	11:2745107:C:T	rs231917	Secondary	KCNQ1	intronic	NA	NA	84.3	0.0117	++	0.32	0.042	0.005	1.12e-17	0.319	0.054	0.007	2.61e-15	0.32	0.029	0.007	3.35e-05	KCNQ1;CDKN1C;KCNQ1OT1	KCNQ1	KCNQ1 [nearest(intronic) / Non_PAN_SMR <Neg_Exp (Blood)>] / CDKN1C [Non_PAN_SMR <Neg_Exp (Blood)>] / KCNQ1OT1 [Non_PAN_SMR <Pos_Exp (THY) / Neg_Exp (Brain)>]
TA-meta-332	11:8621547 - 11:8721547	Cross	11:8671547:A:G	rs10769938	Primary	TRIM66	intronic	0.3	4	0	0.633	--	0.534	0.033	0.005	1.48e-12	0.39	0.031	0.006	4.74e-07	0.722	0.036	0.007	5.73e-07	TRIM66;AKIP1;RPL27A;ST5;STK33	TRIM66	TRIM66 [nearest(intronic) / rs11042023 [VEP_Medium: R2 (EAS:EUR=0.99:0.73)] / Non_PAN_ABC (Brain)] / AKIP1 [Non_PAN_ABC (Brain)] / RPL27A [Non_PAN_ABC (Brain)] / ST5 [Non_PAN_ABC (Brain)] / STK33 [Non_PAN_ABC (Brain)]
TA-meta-333	11:14713828 - 11:14813828	Cross/EUR	11:14763828:C:A	rs141521721	Primary	PDE3B	intronic	0.41	9	NA	NA	?+	0.023	0.121	0.021	1.48e-08	NA	NA	NA	NA	0.023	0.121	0.021	1.39e-08	PDE3B	PDE3B	PDE3B [nearest(intronic)]
TA-meta-334	11:17358630 - 11:17458630	Cross/EAS/EUR	11:17408630:T:C	rs5215	Primary	KCNJ11	exonic	0.33	3	0	0.627	--	0.374	0.068	0.004	1.47e-51	0.375	0.066	0.006	9.6e-27	0.373	0.071	0.007	9.85e-27	KCNJ11;ABCC8;NCR3LG1;NUCB2;PIK3C2A	KCNJ11	KCNJ11 [nearest(exonic) / rs5219 [VEP_High: R2 (EAS:EUR=1:1)] / Very-Strongly-Pan-related <PAN_ABC (beta; alpha; PAN_Nasser)> / Non_PAN_ABC (LIV; MuSc; THY; Co); Non_PAN_SMR <Pos_Exp (Blood) / Neg_Exp (THY; Brain)>] / ABCC8 [rs757110 [VEP_Low: R2 (EAS:EUR=0.88:0.93)] / Very-Strongly-Pan-related <PAN_ABC (beta; alpha; acinar)> / Non_PAN_ABC (LIV); Non_PAN_SMR <Neg_Exp (Brain)>] / NCR3LG1 [Very-Str…
TA-meta-335	11:27640399 - 11:27740399	Cross/EAS	11:27690399:T:C	rs2353487	Primary	BDNF	intronic	0.36	20	0	0.804	--	0.283	0.034	0.005	1.96e-12	0.242	0.035	0.007	3.33e-07	0.323	0.033	0.007	1.34e-06	BDNF	BDNF	BDNF [nearest(intronic) / Non_PAN_ABC (MuSc; THY; ADR; Brain; Co)]
TA-meta-336	11:30558133 - 11:30658133	Cross	11:30608133:G:A	rs11031140	Primary	MPPED2	intronic	0.5	2	0	0.38	++	0.159	0.035	0.006	4.02e-08	0.106	0.028	0.01	0.0059	0.193	0.04	0.008	1.24e-06	MPPED2;ARL14EP;DCDC1;DNAJC24;RCN1	MPPED2	MPPED2 [nearest(intronic) / Non_PAN_ABC (Brain)] / ARL14EP [Pan-related <PAN_ABC (alpha; PAN_Nasser)> / Non_PAN_ABC (LIV; MuSc; THY; ADR; Brain; Co)] / DCDC1 [Pan-related <PAN_ABC (PAN_Nasser)> / Non_PAN_ABC (LIV; THY; ADR; Brain; Co)] / DNAJC24 [Pan-related <PAN_ABC (PAN_Nasser)> / Non_PAN_ABC (LIV; THY; ADR; Brain; Co)] / RCN1 [Non_PAN_ABC (LIV; THY; ADR; Brain)]
TA-meta-337	11:32877778 - 11:32977778	Cross/EUR	11:32927778:G:T	rs145678014	Primary	QSER1	intronic	0.72	10	NA	NA	?-	0.043	-0.105	0.016	1.28e-10	NA	NA	NA	NA	0.043	-0.105	0.016	1.4e-10	QSER1;EIF3M;CSTF3;DCDC1;DNAJC24	QSER1	QSER1 [nearest(intronic) / rs62618693 [VEP_Medium: R2 (EAS:EUR=ND:0.98)]] / EIF3M [Pan-related <PAN_ABC (alpha; PAN_Nasser)> / Non_PAN_ABC (Adp; MuSc; ADR; Brain; SI; Co)] / CSTF3 [Non_PAN_ABC (MuSc)] / DCDC1 [Non_PAN_ABC (SI)] / DNAJC24 [Non_PAN_ABC (SI)]
TA-meta-338	11:34900920 - 11:35000920	Cross/EAS/EUR	11:34950920:C:G	rs967506	Primary	PDHX	intronic	0.09	110	8.9	0.295	--	0.302	0.032	0.005	1.09e-11	0.292	0.028	0.007	3.51e-05	0.312	0.038	0.007	3.59e-08	APIP;PDHX;CD59;COMMD9;FBXO3-AS1	PDHX	APIP [rs1977420 [VEP_Medium: R2 (EAS:EUR=0.94:0.25)] / Very-Strongly-Pan-related <PAN_ABC (beta; alpha; acinar; ductal; PAN_Nasser)> / Non_PAN_ABC (Adp; LIV; MuSc; THY; ADR; Brain; SI; Co)] / PDHX [nearest(intronic) / Very-Strongly-Pan-related <PAN_ABC (beta; alpha; acinar; ductal; PAN_Nasser)> / Non_PAN_ABC (Adp; LIV; MuSc; THY; ADR; Brain; SI; Co); Non_PAN_SMR <Pos_Exp (Blood)>] / CD59 [Strongl…
TA-meta-339	11:34900920 - 11:35000920	Cross/EAS/EUR	11:35437863:G:C	rs2421897	Secondary	SLC1A2	intronic	NA	NA	76.6	0.0386	-+	0.119	-0.049	0.009	9.21e-09	0.13	-0.055	0.009	1.27e-09	0.013	0.007	0.029	0.794	SLC1A2;PAMR1	SLC1A2	SLC1A2 [nearest(intronic) / Non_PAN_ABC (Brain)] / PAMR1 [Pan-related <PAN_ABC (PAN_Nasser)>]
TA-meta-340	11:43828459 - 11:43928459	Cross/EUR	11:43878459:G:A	rs35251247	Primary	HSD17B12	downstream	0.15	38	92.5	0.000262	++	0.251	0.033	0.005	2.32e-10	0.211	0.013	0.007	0.0867	0.287	0.051	0.007	1.31e-12	HSD17B12;ALKBH3;RP11-613D13.5	HSD17B12	HSD17B12 [nearest(downstream) / rs11555762 [VEP_Low: R2 (EAS:EUR=1:0.94)] / Non_PAN_ABC (Brain); Non_PAN_SMR <Pos_Exp (Brain; Blood)>] / ALKBH3 [Non_PAN_ABC (Adp); Non_PAN_SMR <Neg_Exp (Blood)>] / RP11-613D13.5 [Pan-related <PAN-SMR (Pos_Exp)> / Non_PAN_SMR <Pos_Exp (Adp-Sub; Co)>]
TA-meta-341	11:45808584 - 11:45908584	Cross/EUR	11:45858584:G:A	rs12419690	Primary	CRY2(-10.1kb)	intergenic	0.2	23	1.4	0.314	--	0.411	-0.031	0.005	1.17e-10	0.232	-0.025	0.007	0.000432	0.552	-0.035	0.006	3.89e-08	CRY2;MAPK8IP1;SLC35C1;C11orf94	CRY2	CRY2 [nearest(intergenic) / Pan-related <PAN_ABC (PAN_Nasser)> / Non_PAN_ABC (Adp; LIV; MuSc; THY; ADR; Brain; Co); Non_PAN_SMR <Pos_Exp (Blood)>] / MAPK8IP1 [Strongly-Pan-related <PAN_ABC (acinar; PAN_Nasser)> / Non_PAN_ABC (MuSc; Brain)] / SLC35C1 [Pan-related <PAN_ABC (PAN_Nasser)> / Non_PAN_ABC (MuSc)] / C11orf94 [Non_PAN_ABC (MuSc)]
TA-meta-342	11:57994778 - 11:58094778	Cross	11:58044778:A:G	rs4288769	Primary	OR10W1(+9kb)	intergenic	0.04	216	29.7	0.233	++	0.306	-0.029	0.005	9.32e-09	0.173	-0.036	0.008	5.1e-06	0.396	-0.024	0.006	0.000232	OR5B2;OR5B3;OR10W1;OR5B12;OR5B17	OR5B2	OR5B2 [rs10466659 [VEP_Low: R2 (EAS:EUR=0.87:0.39)] / Non_PAN_ABC (Adp)] / OR5B3 [rs11229411 [VEP_Medium: R2 (EAS:EUR=0.88:0.79)]] / OR10W1 [nearest(intergenic)] / OR5B12 [rs11229457 [VEP_Low: R2 (EAS:EUR=0.9:0.39)]] / OR5B17 [rs4127353 [VEP_Low: R2 (EAS:EUR=0.93:0.81)]]
TA-meta-343	11:61515908 - 11:61615908	Cross	11:61565908:T:C	rs174541	Primary	FADS2	intronic	0.13	47	0	0.539	++	0.415	-0.028	0.005	1.06e-08	0.474	-0.025	0.007	0.000544	0.363	-0.031	0.007	4.62e-06	FADS1;TMEM258;FADS2;FEN1;MYRF	FADS1	FADS1 [Very-Strongly-Pan-related <PAN_ABC (beta; alpha; acinar; ductal; PAN_Nasser) / PAN-SMR (Neg_Exp)> / Non_PAN_ABC (Adp; LIV; MuSc; THY; ADR; Brain; SI; Co); Non_PAN_SMR <Neg_Exp (Brain)>] / TMEM258 [Very-Strongly-Pan-related <PAN_ABC (beta; alpha; acinar; ductal; PAN_Nasser)> / Non_PAN_ABC (Adp; LIV; MuSc; THY; ADR; Brain; SI; Co); Non_PAN_SMR <Neg_Exp (Brain; Blood)>] / FADS2 [nearest(intro…
TA-meta-344	11:65276154 - 11:65376154	Cross/EUR	11:65326154:G:A	rs12789028	Primary	LTBP3	5UTR	0.54	11	78.9	0.0295	++	0.179	0.048	0.006	4.44e-17	0.173	0.036	0.008	5.66e-06	0.185	0.061	0.008	1.14e-13	SSSCA1-AS1;FAM89B;LTBP3;SCYL1;SSSCA1	SSSCA1-AS1	SSSCA1-AS1 [Very-Strongly-Pan-related <PAN_ABC (beta; alpha; acinar; ductal; PAN_Nasser)> / Non_PAN_ABC (Adp; LIV; MuSc; THY; ADR; Brain; SI; Co); Non_PAN_SMR <Pos_Exp (Adp-Sub; MuSc; THY; Co; Blood)>] / FAM89B [Strongly-Pan-related <PAN_ABC (acinar; ductal; PAN_Nasser)> / Non_PAN_ABC (Adp; LIV; MuSc; THY; ADR; Brain; SI; Co)] / LTBP3 [nearest(5UTR) / Pan-related <PAN_ABC (alpha; ductal; PAN_Nass…
TA-meta-345	11:65276154 - 11:65376154	Cross/EUR	11:65824994:T:C	rs2302883	Secondary	SF3B2	intronic	NA	NA	0	0.514	--	0.187	0.034	0.006	1.01e-08	0.105	0.039	0.01	5.89e-05	0.237	0.031	0.007	3.92e-05	SF3B2;PACS1;CATSPER1;GAL3ST3;KLC2	SF3B2	SF3B2 [nearest(intronic) / Very-Strongly-Pan-related <PAN_ABC (beta; alpha; acinar; PAN_Nasser)> / Non_PAN_ABC (Adp; LIV; MuSc; THY; ADR; Brain)] / PACS1 [Strongly-Pan-related <PAN_ABC (alpha; acinar; ductal; PAN_Nasser)> / Non_PAN_ABC (Adp; LIV; MuSc; THY; ADR; Brain; SI; Co); Non_PAN_SMR <Pos_Exp (Blood)>] / CATSPER1 [Pan-related <PAN_ABC (PAN_Nasser)>] / GAL3ST3 [rs4565902 [VEP_Low: R2 (EAS:EU…
TA-meta-346	11:68805363 - 11:68905363	Cross	11:68855363:G:A	rs3829241	Primary	TPCN2	exonic	0.37	7	0	0.821	++	0.319	0.033	0.005	8.94e-12	0.225	0.032	0.007	7.43e-06	0.4	0.034	0.007	2.54e-07	TPCN2;AP003071.2;MYEOV;RP11-554A11.9;SMIM38	TPCN2	TPCN2 [nearest(exonic) / rs3829241 [VEP_Low: R2 (EAS:EUR=1:1)] / Non_PAN_SMR <Pos_Exp (Brain)>] / AP003071.2 [Non_PAN_SMR <Neg_Exp (Brain)>] / MYEOV [Non_PAN_SMR <Pos_Exp (Adp-Sub)>] / RP11-554A11.9 [Non_PAN_SMR <Pos_Exp (Blood)>] / SMIM38 [Non_PAN_SMR <Pos_Exp (Brain)>]
TA-meta-347	11:69413679 - 11:69513679	Cross/EUR	11:69463679:A:G	rs3212880	Primary	CCND1	intronic	0.48	7	0	0.436	++	0.022	-0.146	0.018	1.02e-16	0.012	-0.168	0.032	2.37e-07	0.027	-0.137	0.021	6.63e-11	CCND1;ORAOV1;FADD;FGF19;MYEOV	CCND1	CCND1 [nearest(intronic) / Very-Strongly-Pan-related <PAN_ABC (beta; acinar; ductal; PAN_Nasser)> / Non_PAN_ABC (Adp; LIV; MuSc; THY; ADR; Brain; SI; Co)] / ORAOV1 [Very-Strongly-Pan-related <PAN_ABC (beta; alpha; acinar; ductal; PAN_Nasser)> / Non_PAN_ABC (Adp; LIV; MuSc; THY; ADR; Brain; SI; Co); Non_PAN_SMR <Pos_Exp (Blood)>] / FADD [Non_PAN_ABC (Adp; Brain)] / FGF19 [Non_PAN_ABC (LIV; Brain)]…
TA-meta-348	11:69413679 - 11:69513679	Cross/EUR	11:69453230:T:C	rs2510461	Secondary	CCND1	upstream	NA	NA	60.6	0.111	++	0.373	-0.023	0.005	1.43e-05	0.163	-0.034	0.009	0.000114	0.491	-0.016	0.006	0.0115	CCND1;ORAOV1;MYEOV;RP11-211G23.2	CCND1	CCND1 [nearest(upstream) / Very-Strongly-Pan-related <PAN_ABC (beta; ductal; PAN_Nasser)> / Non_PAN_ABC (Adp; LIV; MuSc; THY; ADR; Brain; SI; Co)] / ORAOV1 [Non_PAN_ABC (LIV; MuSc; Brain); Non_PAN_SMR <Pos_Exp (Blood)>] / MYEOV [Non_PAN_ABC (Brain)] / RP11-211G23.2 [Non_PAN_SMR <Pos_Exp (Adp-Sub)>]
TA-meta-349	11:72413435 - 11:72513435	Cross/EAS/EUR	11:72463435:G:A	rs7109575	Primary	ARAP1	5UTR	0.31	4	83.1	0.0151	--	0.132	-0.112	0.007	2.72e-53	0.058	-0.138	0.013	1.02e-25	0.164	-0.1	0.009	1.21e-30	STARD10;ARAP1;PDE2A;ATG16L2;RP11-169D4.1	STARD10	STARD10 [Very-Strongly-Pan-related <PAN_ABC (beta; alpha; acinar; ductal; PAN_Nasser)> / Non_PAN_ABC (Adp; LIV; MuSc; THY; ADR; Brain; SI; Co); Non_PAN_SMR <Pos_Exp (Brain; Blood)>] / ARAP1 [nearest(5UTR) / Pan-related <PAN_ABC (alpha; ductal; PAN_Nasser)> / Non_PAN_ABC (Adp; LIV; MuSc; THY; ADR; Brain; SI; Co); Non_PAN_SMR <Neg_Exp (Brain)>] / PDE2A [Pan-related <PAN_ABC (PAN_Nasser)> / Non_PAN_…
TA-meta-350	11:75400576 - 11:75500576	Cross/EAS	11:75450576:T:C	rs673335	Primary	MOGAT2(+6.6kb)	intergenic	0.41	7	12.7	0.285	--	0.279	0.031	0.005	7.36e-10	0.339	0.035	0.006	3.01e-08	0.178	0.024	0.008	0.00386	MOGAT2;DGAT2	MOGAT2	MOGAT2 [nearest(intergenic) / Non_PAN_ABC (Adp)] / DGAT2 [Non_PAN_ABC (Adp; LIV)]
TA-meta-351	11:76106973 - 11:76206973	Cross	11:76156973:G:A	rs61894507	Primary	C11orf30	intronic	0.05	29	0	0.699	--	0.253	-0.029	0.005	4.16e-08	0.141	-0.032	0.009	0.000253	0.321	-0.028	0.007	4.14e-05	C11orf30;CLNS1A;LOC100506127;LOC101928837;THAP12	CLNS1A	C11orf30 [nearest(intronic) / Pan-related <PAN_ABC (PAN_Nasser)> / Non_PAN_ABC (Adp; LIV; MuSc; ADR; Brain; SI; Co)] / CLNS1A [Very-Strongly-Pan-related <PAN_ABC (beta; alpha)> / Non_PAN_ABC (Adp; MuSc; Brain)] / LOC100506127 [Very-Strongly-Pan-related <PAN_ABC (beta; alpha)>] / LOC101928837 [Very-Strongly-Pan-related <PAN_ABC (beta; alpha)>] / THAP12 [Very-Strongly-Pan-related <PAN_ABC (beta; al…
TA-meta-352	11:92658710 - 11:92758710	Cross/EAS/EUR	11:92708710:C:G	rs10830963	Primary	MTNR1B	intronic	0.46	5	98.1	2.15e-13	--	0.362	0.062	0.005	2.77e-40	0.423	0.032	0.006	1.03e-07	0.279	0.101	0.007	1.12e-45	MTNR1B	MTNR1B	MTNR1B [nearest(intronic)]
TA-meta-353	11:92658710 - 11:92758710	Cross/EAS/EUR	11:93131667:C:A	rs11020308	Secondary	CCDC67	intronic	NA	NA	45.2	0.177	++	0.324	0.032	0.005	2.37e-09	0.136	0.022	0.009	0.0164	0.423	0.037	0.006	1.72e-08	CCDC67;AP003969.2	CCDC67	CCDC67 [nearest(intronic) / Non_PAN_ABC (Brain)] / AP003969.2 [Non_PAN_SMR <Pos_Exp (Brain)>]
TA-meta-354	11:115866440 - 11:115966440	Cross	11:115916440:C:G	rs406641	Primary	CADM1(+540.8kb)	intergenic	0.56	12	0	0.591	--	0.433	0.027	0.005	5.37e-09	0.356	0.029	0.006	7.33e-06	0.508	0.024	0.006	0.000151	CADM1	CADM1	CADM1 [nearest(intergenic)]
TA-meta-355	11:117643255 - 11:117743255	Cross	11:117693255:C:T	rs529623	Primary	FXYD6-FXYD2:FXYD2	intronic:exonic	0.96	1	0	0.522	++	0.468	0.028	0.004	6.85e-10	0.462	0.025	0.006	6.59e-05	0.475	0.031	0.006	1.94e-06	FXYD6-FXYD2;FXYD2;DSCAML1;FXYD6;IL10RA	FXYD6-FXYD2	FXYD6-FXYD2 [nearest(intronic:exonic) / Non_PAN_ABC (Adp)] / FXYD2 [Pan-related <PAN_ABC (PAN_Nasser)> / Non_PAN_ABC (Adp; LIV; MuSc; Brain; Co)] / DSCAML1 [Non_PAN_ABC (Adp)] / FXYD6 [Non_PAN_ABC (Adp)] / IL10RA [Non_PAN_ABC (Adp)]
TA-meta-356	11:118887444 - 11:118987444	Cross	11:118937444:G:A	rs4454730	Primary	VPS11	upstream	0.06	32	0	0.577	++	0.309	0.03	0.005	5.09e-09	0.169	0.026	0.008	0.0013	0.399	0.032	0.006	8.92e-07	HMBS;VPS11;DPAGT1;H2AFX;HYOU1	VPS11	HMBS [rs1006195 [VEP_Medium: R2 (EAS:EUR=0.81:0.86)] / Very-Strongly-Pan-related <PAN_ABC (beta; ductal; PAN_Nasser) / PAN-SMR (Pos_Exp)> / Non_PAN_ABC (Adp; LIV; MuSc; THY; ADR; Brain; SI; Co); Non_PAN_SMR <Pos_Exp (Adp-Sub; Adp-Vis; MuSc; THY; ADR; Brain; PIT; Co; Blood)>] / VPS11 [nearest(upstream) / rs15818 [VEP_High: R2 (EAS:EUR=0.84:0.87)] / Very-Strongly-Pan-related <PAN_ABC (beta; alpha; …
TA-meta-357	11:121901662 - 11:122001662	Cross	11:121951662:G:A	rs687966	Primary	BLID(-34.4kb)	intergenic	0.25	11	0	0.529	--	0.301	-0.029	0.005	1.76e-09	0.322	-0.026	0.006	4.73e-05	0.274	-0.032	0.007	7.3e-06	BLID;RP11-166D19.1;SC5D;SORL1;UBASH3B	BLID	BLID [nearest(intergenic) / Non_PAN_ABC (Adp; MuSc; THY)] / RP11-166D19.1 [Pan-related <PAN_ABC (PAN_Nasser)> / Non_PAN_ABC (Adp; MuSc; THY; ADR; Brain; Co)] / SC5D [Non_PAN_ABC (Adp)] / SORL1 [Non_PAN_ABC (Adp)] / UBASH3B [Non_PAN_ABC (Adp)]
TA-meta-358	11:128339391 - 11:128439391	Cross/EUR	11:128389391:C:T	rs11819995	Primary	ETS1	intronic	0.46	4	0	0.579	++	0.216	0.047	0.006	4.62e-17	0.21	0.044	0.008	6.69e-08	0.221	0.05	0.008	1.3e-10	ETS1	ETS1	ETS1 [nearest(intronic) / Pan-related <PAN_ABC (PAN_Nasser)>]
TA-meta-359	11:128339391 - 11:128439391	Cross/EUR	11:128234144:G:A	rs10750397	Secondary	ETS1(-94.5kb)	intergenic	NA	NA	0	0.446	++	0.27	0.035	0.005	4.96e-13	0.258	0.032	0.007	2.7e-06	0.283	0.039	0.007	3.13e-08	ETS1;C11orf45;FLI1;LOC101929538;SENCR	ETS1	ETS1 [nearest(intergenic) / Non_PAN_ABC (ADR)] / C11orf45 [NA] / FLI1 [Non_PAN_ABC (ADR)] / LOC101929538 [NA] / SENCR [Non_PAN_ABC (ADR)]
TA-meta-360	11:128339391 - 11:128439391	Cross/EUR	11:128042575:T:C	rs10893829	Secondary	ETS1(-286.1kb)	intergenic	NA	NA	86.6	0.00639	++	0.235	-0.036	0.005	2.36e-11	0.284	-0.025	0.007	0.000197	0.148	-0.056	0.009	6.63e-10	ETS1	ETS1	ETS1 [nearest(intergenic)]
TA-meta-361	12:4334844 - 12:4434844	Cross/EAS/EUR	12:4384844:G:T	rs76895963	Primary	CCND2	intronic	1	1	NA	NA	?+	0.98	0.483	0.028	6.04e-69	NA	NA	NA	NA	0.98	0.483	0.028	9.12e-69	CCND2;CCND2-AS1;C12orf5	CCND2	CCND2 [nearest(intronic) / Non_PAN_ABC (MuSc; Brain); Non_PAN_SMR <Pos_Exp (Blood) / Neg_Exp (Adp-Sub; MuSc; PIT)>] / CCND2-AS1 [Non_PAN_ABC (MuSc; Brain); Non_PAN_SMR <Neg_Exp (Brain)>] / C12orf5 [Non_PAN_SMR <Pos_Exp (Blood)>]
TA-meta-362	12:4334844 - 12:4434844	Cross/EAS/EUR	12:4384696:C:T	rs3217792	Secondary	CCND2	intronic	NA	NA	NA	NA	?-	0.087	-0.117	0.012	4.41e-22	NA	NA	NA	NA	0.087	-0.117	0.012	6.27e-22	CCND2;CCND2-AS1;C12orf5;C12orf4;RAD51AP1	CCND2	CCND2 [nearest(intronic) / Strongly-Pan-related <PAN_ABC (acinar; PAN_Nasser)> / Non_PAN_ABC (Adp; LIV; MuSc; THY; ADR; Brain; SI; Co); Non_PAN_SMR <Pos_Exp (Blood) / Neg_Exp (Adp-Sub; MuSc; PIT)>] / CCND2-AS1 [Pan-related <PAN_ABC (PAN_Nasser)> / Non_PAN_ABC (Adp; LIV; MuSc; THY; ADR; Brain; SI; Co); Non_PAN_SMR <Neg_Exp (Brain)>] / C12orf5 [Non_PAN_ABC (ADR); Non_PAN_SMR <Pos_Exp (Blood)>] / C1…
TA-meta-363	12:12821099 - 12:12921099	Cross/EUR	12:12871099:T:G	rs2066827	Primary	CDKN1B	exonic	0.99	1	0	0.371	--	0.198	0.044	0.007	1.87e-09	0.033	0.03	0.018	0.0938	0.233	0.047	0.008	4.44e-09	CDKN1B;APOLD1;CREBL2;DDX47;GPR19	CDKN1B	CDKN1B [nearest(exonic) / rs2066827 [VEP_Low: R2 (EAS:EUR=1:1)] / Pan-related <PAN_ABC (PAN_Nasser)> / Non_PAN_ABC (Adp; LIV; MuSc; ADR; Brain; SI; Co)] / APOLD1 [Pan-related <PAN_ABC (PAN_Nasser)> / Non_PAN_ABC (Adp; MuSc; Brain)] / CREBL2 [Pan-related <PAN_ABC (PAN_Nasser)> / Non_PAN_ABC (Adp; LIV; MuSc; Brain)] / DDX47 [Pan-related <PAN_ABC (PAN_Nasser)> / Non_PAN_ABC (Adp; LIV; MuSc; Brain)] …
TA-meta-364	12:20547977 - 12:20647977	Cross	12:20597977:C:T	rs12314390	Primary	PDE3A	intronic	0.78	5	0	0.659	++	0.049	0.062	0.01	9.32e-10	0.049	0.066	0.014	2.2e-06	0.05	0.058	0.015	9.83e-05	PDE3A	PDE3A	PDE3A [nearest(intronic)]
TA-meta-365	12:21781069 - 12:21881069	Cross	12:21831069:G:T	rs12426310	Primary	LDHB	intronic	0.09	57	0	0.96	--	0.212	-0.037	0.006	1.63e-10	0.126	-0.036	0.009	7.17e-05	0.268	-0.037	0.007	6.02e-07	LDHB;CMAS;GOLT1B;PYROXD1;RECQL	LDHB	LDHB [nearest(intronic) / Very-Strongly-Pan-related <PAN_ABC (beta; alpha; acinar; PAN_Nasser)> / Non_PAN_ABC (Adp; LIV; MuSc; THY; ADR; Brain; SI; Co)] / CMAS [Strongly-Pan-related <PAN_ABC (acinar; PAN_Nasser)> / Non_PAN_ABC (Adp; MuSc; THY; ADR; Brain; Co)] / GOLT1B [Strongly-Pan-related <PAN_ABC (acinar; PAN_Nasser)> / Non_PAN_ABC (Adp; MuSc; THY; ADR; Brain; SI; Co)] / PYROXD1 [Strongly-Pan-…
TA-meta-366	12:26420850 - 12:26520850	Cross/EUR	12:26470850:A:T	rs1027087	Primary	SSPN(+18.6kb)	intergenic	0.24	15	86.9	0.00568	++	0.494	-0.031	0.005	3.3e-10	0.279	-0.018	0.007	0.00659	0.742	-0.045	0.007	3.29e-10	SSPN;AC022509.5;BHLHE41;IFLTD1	SSPN	SSPN [nearest(intergenic) / Non_PAN_ABC (Adp; MuSc)] / AC022509.5 [Non_PAN_SMR <Neg_Exp (Brain)>] / BHLHE41 [Non_PAN_ABC (MuSc)] / IFLTD1 [Non_PAN_ABC (MuSc)]
TA-meta-367	12:27913402 - 12:28013402	Cross/EAS/EUR	12:27963402:G:A	rs3751236	Primary	KLHL42(+7.4kb)	intergenic	0.08	13	0	0.535	--	0.282	-0.071	0.005	2.45e-45	0.335	-0.068	0.006	1.83e-26	0.196	-0.075	0.008	1.54e-20	KLHL42;AC009509.4;MRPS35;RP11-1060J15.5	KLHL42	KLHL42 [nearest(intergenic) / Non_PAN_SMR <Neg_Exp (Blood)>] / AC009509.4 [Non_PAN_SMR <Neg_Exp (Brain)>] / MRPS35 [Non_PAN_SMR <Neg_Exp (Blood)>] / RP11-1060J15.5 [Non_PAN_SMR <Neg_Exp (Co)>]
TA-meta-368	12:31391179 - 12:31491179	Cross/EAS	12:31441179:A:C	rs80234489	Primary	FAM60A	intronic	0.77	4	0	0.481	--	0.169	0.106	0.008	1.54e-39	0.17	0.106	0.008	8.72e-39	0.008	0.173	0.094	0.0679	FAM60A;ETFBKMT;FLJ13224;DNM1L;FGD4	FAM60A	FAM60A [nearest(intronic) / Very-Strongly-Pan-related <PAN_ABC (beta; alpha; acinar; ductal; PAN_Nasser)> / Non_PAN_ABC (LIV; MuSc; ADR; Brain; SI; Co); Non_PAN_SMR <Pos_Exp (MuSc; Blood)>] / ETFBKMT [Very-Strongly-Pan-related <PAN_ABC (beta)>] / FLJ13224 [Very-Strongly-Pan-related <PAN_ABC (beta; alpha; acinar; ductal)>] / DNM1L [Pan-related <PAN_ABC (PAN_Nasser)> / Non_PAN_ABC (Brain; SI; Co)] …
TA-meta-369	12:50213148 - 12:50313148	Cross/EAS	12:50263148:G:A	rs7132908	Primary	FAIM2	3UTR	0.76	3	0	0.608	++	0.324	0.036	0.005	4.13e-14	0.248	0.039	0.007	2.09e-08	0.393	0.034	0.007	3.24e-07	FAIM2;AQP5;BCDIN3D;BCDIN3D-AS1;NCKAP5L	FAIM2	FAIM2 [nearest(3UTR) / Very-Strongly-Pan-related <PAN_ABC (beta; alpha)> / Non_PAN_ABC (Adp; MuSc; Brain; Co)] / AQP5 [Non_PAN_ABC (Co)] / BCDIN3D [Non_PAN_ABC (MuSc; Co)] / BCDIN3D-AS1 [Non_PAN_ABC (Co)] / NCKAP5L [Non_PAN_ABC (Co)]
TA-meta-370	12:50937378 - 12:51037378	Cross	12:50987378:G:A	rs55877451	Primary	DIP2B	intronic	0.1	70	0	0.827	--	0.307	-0.03	0.005	2.18e-09	0.321	-0.029	0.007	5.39e-05	0.294	-0.031	0.007	9.28e-06	DIP2B	DIP2B	DIP2B [nearest(intronic) / rs10783372 [VEP_High: R2 (EAS:EUR=0.99:0.99)] / Pan-related <PAN_ABC (PAN_Nasser)> / Non_PAN_ABC (Adp; LIV; MuSc; ADR; Brain; SI; Co); Non_PAN_SMR <Neg_Exp (THY)>]
TA-meta-371	12:57096069 - 12:57196069	Cross/EAS	12:57146069:T:G	rs2277339	Primary	PRIM1:HSD17B6	exonic:5UTR	1	1	0	0.451	--	0.179	0.038	0.006	1.73e-10	0.214	0.042	0.007	1.22e-08	0.104	0.032	0.011	0.00264	PRIM1;HSD17B6;NACA	PRIM1	PRIM1 [nearest(exonic:5UTR) / rs2277339 [VEP_Medium: R2 (EAS:EUR=1:1)] / Very-Strongly-Pan-related <PAN_ABC (beta; PAN_Nasser)> / Non_PAN_ABC (Adp; LIV; MuSc; ADR; Brain; SI; Co); Non_PAN_SMR <Pos_Exp (Brain; Blood)>] / HSD17B6 [Pan-related <PAN_ABC (PAN_Nasser)> / Non_PAN_ABC (LIV; MuSc; Brain)] / NACA [Non_PAN_ABC (Brain)]
TA-meta-372	12:66189111 - 12:66289111	Cross/EAS/EUR	12:66239111:A:C	rs2612059	Primary	HMGA2	intronic	0.31	5	82.1	0.0181	--	0.274	0.065	0.005	4.25e-35	0.338	0.056	0.006	9.14e-19	0.141	0.083	0.009	2.55e-19	HMGA2	HMGA2	HMGA2 [nearest(intronic)]
TA-meta-373	12:66189111 - 12:66289111	Cross/EAS/EUR	12:66374587:C:T	rs9669278	Secondary	HMGA2(+14.5kb)	intergenic	NA	NA	0	0.487	--	0.382	-0.051	0.005	1.18e-21	0.12	-0.046	0.01	3.75e-06	0.492	-0.054	0.006	3.65e-17	HMGA2	HMGA2	HMGA2 [nearest(intergenic)]
TA-meta-374	12:71401567 - 12:71501567	Cross/EAS/EUR	12:71451567:G:A	rs966583	Primary	TSPAN8(-67.3kb)	intergenic	0.05	20	0	0.629	++	0.393	0.044	0.004	3.49e-23	0.369	0.042	0.006	7.02e-12	0.421	0.046	0.006	8.82e-13	TSPAN8;LGR5	TSPAN8	TSPAN8 [nearest(intergenic) / rs3763978 [VEP_Medium: R2 (EAS:EUR=0.74:0.93)] / Non_PAN_ABC (SI); Non_PAN_SMR <Neg_Exp (LIV)>] / LGR5 [Non_PAN_ABC (SI)]
TA-meta-375	12:95865763 - 12:95965763	Cross/EUR	12:95915763:A:G	rs11108087	Primary	USP44	intronic	0.14	17	0	0.947	--	0.062	0.071	0.012	3.33e-09	0.009	0.069	0.037	0.0628	0.068	0.071	0.013	1.82e-08	METAP2;USP44	USP44	METAP2 [rs2305293 [VEP_Low: R2 (EAS:EUR=0.96:0.96)] / Non_PAN_ABC (LIV)] / USP44 [nearest(intronic)]
TA-meta-376	12:97798910 - 12:97898910	Cross/EAS/EUR	12:97848910:G:C	rs6538804	Primary	NEDD1(+501.8kb)	intergenic	0.26	6	0	0.869	++	0.511	0.032	0.005	1.82e-12	0.421	0.031	0.006	6.4e-07	0.61	0.033	0.007	6.11e-07	NEDD1	NEDD1	NEDD1 [nearest(intergenic)]
TA-meta-377	12:108579780 - 12:108679780	Cross/EAS/EUR	12:108629780:A:G	rs1426371	Primary	WSCD2	intronic	0.96	1	0	0.803	--	0.59	0.05	0.005	5e-26	0.483	0.049	0.006	4.82e-15	0.734	0.052	0.007	1.74e-12	WSCD2	WSCD2	WSCD2 [nearest(intronic) / rs3764002 [VEP_Medium: R2 (EAS:EUR=0.94:0.99)]]
TA-meta-378	12:111786771 - 12:111886771	Cross/EAS	12:111836771:A:AC	rs149212747	Primary	SH2B3(-7kb)	intergenic	0.9	4	NA	NA	+?	0.226	-0.054	0.008	3.26e-11	0.226	-0.054	0.008	3.64e-11	NA	NA	NA	NA	SH2B3	SH2B3	SH2B3 [nearest(intergenic) / Non_PAN_ABC (Adp; ADR)]
TA-meta-379	12:114067760 - 12:114167760	Cross/EAS	12:114117760:C:T	rs615756	Primary	RBM19(-136.8kb)	intergenic	0.23	34	0	0.641	++	0.321	0.033	0.005	4.58e-10	0.402	0.034	0.006	2.91e-08	0.118	0.029	0.01	0.00343	RBM19	RBM19	RBM19 [nearest(intergenic)]
TA-meta-380	12:118362373 - 12:118462373	Cross/EAS/EUR	12:118412373:G:A	rs34965774	Primary	KSR2(+5.6kb)	intergenic	0.49	8	22	0.257	++	0.202	0.062	0.006	4.15e-27	0.24	0.067	0.007	7.86e-20	0.142	0.054	0.009	6.38e-09	KSR2;LOC105370024;PEBP1;VSIG10;WSB2	LOC105370024	KSR2 [nearest(intergenic) / Pan-related <PAN_ABC (PAN_Nasser)> / Non_PAN_ABC (LIV; Brain; Co)] / LOC105370024 [Very-Strongly-Pan-related <PAN_ABC (beta; alpha)>] / PEBP1 [Very-Strongly-Pan-related <PAN_ABC (beta; alpha)>] / VSIG10 [Very-Strongly-Pan-related <PAN_ABC (beta; ductal)>] / WSB2 [Very-Strongly-Pan-related <PAN_ABC (beta; alpha; acinar)>]
TA-meta-381	12:121313506 - 12:121413506	Cross/EAS/EUR	12:121363506:A:G	rs118074491	Primary	SPPL3(+21.3kb)	intergenic	0.63	3	NA	NA	-?	0.032	0.181	0.018	4.32e-23	0.032	0.181	0.018	4.53e-23	NA	NA	NA	NA	ACADS;HNF1A;P2RX7;SPPL3;UNC119B	ACADS	ACADS [Very-Strongly-Pan-related <PAN_ABC (beta; alpha; acinar; ductal; PAN_Nasser)> / Non_PAN_ABC (Adp; LIV; MuSc; THY; ADR; Brain; Co)] / HNF1A [Pan-related <PAN_ABC (PAN_Nasser)> / Non_PAN_ABC (Co); Non_PAN_SMR <Neg_Exp (Blood)>] / P2RX7 [Pan-related <PAN_ABC (PAN_Nasser)> / Non_PAN_ABC (Adp; MuSc; Brain; Co); Non_PAN_SMR <Pos_Exp (Brain)>] / SPPL3 [nearest(intergenic) / Pan-related <PAN_ABC (…
TA-meta-382	12:121313506 - 12:121413506	Cross/EAS/EUR	12:121432299:C:T	rs55783344	Secondary	HNF1A	intronic	NA	NA	91.1	0.00078	+-	0.166	0.069	0.008	5.55e-20	0.18	0.077	0.008	1.5e-22	0.016	-0.014	0.026	0.579	C12orf43;HNF1A;HNF1A-AS1;P2RX4;P2RX7	C12orf43	C12orf43 [rs3751152 [VEP_Medium: R2 (EAS:EUR=0.88:0.98)] / Very-Strongly-Pan-related <PAN_ABC (beta; ductal; PAN_Nasser)> / Non_PAN_ABC (Adp; LIV; MuSc; ADR; Brain; SI; Co)] / HNF1A [nearest(intronic) / Pan-related <PAN_ABC (PAN_Nasser)> / Non_PAN_ABC (Adp; LIV; SI; Co); Non_PAN_SMR <Neg_Exp (Blood)>] / HNF1A-AS1 [Pan-related <PAN_ABC (alpha; PAN_Nasser)> / Non_PAN_ABC (LIV; MuSc; Brain; SI; Co)]…
TA-meta-383	12:121313506 - 12:121413506	Cross/EAS/EUR	12:121456616:G:T	rs61953351	Secondary	OASL(-1.5kb)	intergenic	NA	NA	0	0.805	--	0.256	-0.058	0.007	7.64e-16	0.005	-0.044	0.058	0.445	0.26	-0.059	0.007	1.29e-15	HNF1A;OASL;P2RX4;P2RX7;RP11-340F14.5	OASL	HNF1A [Non_PAN_SMR <Neg_Exp (Blood)>] / OASL [nearest(intergenic)] / P2RX4 [Non_PAN_SMR <Pos_Exp (Blood)>] / P2RX7 [Non_PAN_SMR <Pos_Exp (Brain)>] / RP11-340F14.5 [Non_PAN_SMR <Pos_Exp (Blood)>]
TA-meta-384	12:121313506 - 12:121413506	Cross/EAS/EUR	12:121600140:G:A	rs28360446	Secondary	P2RX7	3UTR	NA	NA	42.2	0.188	++	0.025	0.091	0.019	1.15e-06	0.009	0.021	0.057	0.716	0.027	0.1	0.02	4.99e-07	BCL7A;LOC100506691;MLXIP;P2RX7;WDR66	WDR66	BCL7A [Very-Strongly-Pan-related <PAN_ABC (beta; alpha; acinar; PAN_Nasser)> / Non_PAN_ABC (MuSc)] / LOC100506691 [Very-Strongly-Pan-related <PAN_ABC (beta; alpha; acinar; ductal)>] / MLXIP [Very-Strongly-Pan-related <PAN_ABC (beta; alpha; acinar; ductal; PAN_Nasser)> / Non_PAN_ABC (Adp; LIV; MuSc; THY; ADR; Brain; SI; Co)] / P2RX7 [nearest(3UTR) / Non_PAN_SMR <Pos_Exp (Brain)>] / WDR66 [Very-Str…
TA-meta-385	12:123414279 - 12:123514279	Cross/EUR	12:123464279:C:T	rs3759115	Primary	OGFOD2:ABCB9	3UTR:5UTR	0.29	184	0	0.505	--	0.313	-0.032	0.005	1.51e-10	0.336	-0.028	0.007	4.58e-05	0.291	-0.035	0.007	6.06e-07	ARL6IP4;C12orf65;CDK2AP1;MPHOSPH9;OGFOD2	ARL6IP4	ARL6IP4 [Very-Strongly-Pan-related <PAN_ABC (beta; alpha; acinar; ductal; PAN_Nasser) / PAN-SMR (Pos_Exp)> / Non_PAN_ABC (Adp; LIV; MuSc; ADR; Brain; SI; Co); Non_PAN_SMR <Neg_Exp (Blood)>] / C12orf65 [Very-Strongly-Pan-related <PAN_ABC (beta; alpha; acinar; ductal; PAN_Nasser)> / Non_PAN_ABC (Adp; LIV; MuSc; THY; ADR; Brain; SI; Co); Non_PAN_SMR <Pos_Exp (Adp-Vis) / Neg_Exp (Brain)>] / CDK2AP1 […
TA-meta-386	12:124460391 - 12:124560391	Cross/EUR	12:124510391:T:C	rs10773051	Primary	FAM101A	intronic	0.04	60	83	0.0153	--	0.582	0.027	0.005	9.47e-09	0.465	0.018	0.006	0.00304	0.765	0.041	0.007	4.98e-08	FAM101A;CCDC92;ZNF664;ATP6V0A2;TCTN2	FAM101A	FAM101A [nearest(intronic) / Non_PAN_ABC (Adp)] / CCDC92 [Non_PAN_ABC (Adp); Non_PAN_SMR <Neg_Exp (Brain)>] / ZNF664 [Non_PAN_ABC (Adp); Non_PAN_SMR <Neg_Exp (Blood)>] / ATP6V0A2 [Non_PAN_ABC (Adp)] / TCTN2 [Non_PAN_ABC (Adp)]
TA-meta-387	12:133020294 - 12:133120294	Cross/EUR	12:133070294:C:T	rs11614914	Primary	FBRSL1	intronic	0.46	9	0	0.901	++	0.257	0.05	0.006	7.82e-18	0.124	0.051	0.01	1.77e-07	0.33	0.049	0.007	9.75e-12	FBRSL1;LRCOL1;NOC4L;POLE;PXMP2	FBRSL1	FBRSL1 [nearest(intronic) / Pan-related <PAN_ABC (PAN_Nasser)> / Non_PAN_ABC (Adp; LIV; MuSc; ADR; Brain; SI; Co)] / LRCOL1 [Pan-related <PAN_ABC (PAN_Nasser)> / Non_PAN_ABC (Adp); Non_PAN_SMR <Pos_Exp (Blood)>] / NOC4L [Strongly-Pan-related <PAN_ABC (acinar; PAN_Nasser)> / Non_PAN_ABC (Adp; LIV; ADR)] / POLE [Pan-related <PAN_ABC (PAN_Nasser)> / Non_PAN_ABC (Adp)] / PXMP2 [Pan-related <PAN_ABC (…
TA-meta-388	12:133716122 - 12:133816122	Cross	12:133766122:A:G	rs12828318	Primary	ZNF268	intronic	0.76	15	0	0.833	++	0.153	-0.037	0.006	1.87e-08	0.113	-0.035	0.01	0.000477	0.183	-0.038	0.009	9.6e-06	ZNF268;AC127070.2;ZNF10;ZNF140;ZNF605	ZNF268	ZNF268 [nearest(intronic)] / AC127070.2 [Non_PAN_SMR <Pos_Exp (Brain)>] / ZNF10 [Non_PAN_SMR <Neg_Exp (Blood)>] / ZNF140 [Non_PAN_SMR <Neg_Exp (Blood)>] / ZNF605 [Non_PAN_SMR <Neg_Exp (Blood)>]
TA-meta-389	13:22549995 - 13:22649995	Cross/EAS	13:22599995:T:A	rs116237007	Primary	FGF9(+321.4kb)	intergenic	0.18	25	NA	NA	+?	0.371	0.039	0.007	2.04e-08	0.371	0.039	0.007	1.94e-08	NA	NA	NA	NA	FGF9	FGF9	FGF9 [nearest(intergenic)]
TA-meta-390	13:23259382 - 13:23359382	Cross	13:23309382:T:C	rs314879	Primary	SGCG(-445.7kb)	intergenic	0.98	1	0	0.993	--	0.214	0.036	0.006	1.69e-10	0.214	0.037	0.008	1.02e-05	0.214	0.036	0.008	3.35e-06	SGCG	SGCG	SGCG [nearest(intergenic)]
TA-meta-391	13:26726999 - 13:26826999	Cross/EAS/EUR	13:26776999:A:G	rs34584161	Primary	RNF6	intronic	0.76	4	38.4	0.203	++	0.351	-0.054	0.005	8.79e-30	0.428	-0.059	0.006	9.07e-22	0.239	-0.047	0.007	5.36e-10	RNF6;CDK8;MTMR6;RASL11A;CENPJ	RNF6	RNF6 [nearest(intronic) / Very-Strongly-Pan-related <PAN_ABC (beta; acinar; ductal; PAN_Nasser)> / Non_PAN_ABC (Adp; LIV; MuSc; THY; ADR; Brain; SI; Co)] / CDK8 [Very-Strongly-Pan-related <PAN_ABC (beta; ductal; PAN_Nasser)> / Non_PAN_ABC (Adp; LIV; MuSc; THY; ADR; Brain; SI; Co)] / MTMR6 [Strongly-Pan-related <PAN_ABC (acinar; ductal; PAN_Nasser)> / Non_PAN_ABC (Adp; LIV; MuSc; ADR; Brain; Co)] …
TA-meta-392	13:27979896 - 13:28079896	Cross	13:28029896:A:G	rs9512699	Primary	MTIF3(+5.2kb)	intergenic	0.75	28	0	0.888	--	0.218	0.03	0.005	2.19e-08	0.229	0.029	0.007	5.81e-05	0.204	0.031	0.008	9.75e-05	MTIF3;AL137059.1;GTF3A	MTIF3	MTIF3 [nearest(intergenic) / Non_PAN_ABC (LIV; SI; Co)] / AL137059.1 [Non_PAN_SMR <Pos_Exp (Blood)>] / GTF3A [Non_PAN_ABC (SI)]
TA-meta-393	13:30987903 - 13:31087903	Cross/EUR	13:31037903:G:C	rs2249825	Primary	HMGB1	5UTR	0.36	12	0	0.42	--	0.222	-0.034	0.006	9.76e-10	0.132	-0.029	0.009	0.00147	0.28	-0.038	0.007	1.44e-07	HMGB1;ALOX5AP;KATNAL1;LINC01058;USPL1	HMGB1	HMGB1 [nearest(5UTR) / Very-Strongly-Pan-related <PAN_ABC (beta; alpha; acinar; ductal; PAN_Nasser)> / Non_PAN_ABC (Adp; LIV; MuSc; THY; ADR; Brain; SI; Co)] / ALOX5AP [Pan-related <PAN_ABC (PAN_Nasser)> / Non_PAN_ABC (LIV; Co)] / KATNAL1 [Pan-related <PAN_ABC (PAN_Nasser)> / Non_PAN_ABC (Adp; LIV; MuSc; THY; ADR; Brain; SI; Co)] / LINC01058 [Pan-related <PAN_ABC (PAN_Nasser)> / Non_PAN_ABC (Adp;…
TA-meta-394	13:33504587 - 13:33604587	Cross/EAS/EUR	13:33554587:A:G	rs2858980	Primary	KL(-35.6kb)	intergenic	0.67	4	76	0.041	--	0.169	0.066	0.006	9.3e-30	0.169	0.078	0.008	6.02e-22	0.169	0.054	0.009	4.62e-10	KL	KL	KL [nearest(intergenic)]
TA-meta-395	13:46464492 - 13:46564492	Cross	13:46514492:C:G	rs6561273	Primary	ZC3H13(-14.1kb)	intergenic	0.15	22	0	0.523	++	0.391	-0.03	0.005	1.88e-10	0.394	-0.033	0.007	7.78e-07	0.388	-0.027	0.007	4.25e-05	ZC3H13;CPB2-AS1	ZC3H13	ZC3H13 [nearest(intergenic) / Non_PAN_SMR <Neg_Exp (Brain)>] / CPB2-AS1 [Non_PAN_SMR <Neg_Exp (Brain)>]
TA-meta-396	13:51044114 - 13:51144114	Cross/EAS/EUR	13:51094114:G:T	rs9316500	Primary	DLEU1	intronic	0.6	7	0	0.724	++	0.523	0.037	0.005	2.02e-15	0.374	0.035	0.006	9.61e-09	0.712	0.039	0.007	3.45e-08	DLEU1;GUCY1B2	DLEU1	DLEU1 [nearest(intronic)] / GUCY1B2 [Non_PAN_ABC (MuSc)]
TA-meta-397	13:54057352 - 13:54157352	Cross/EAS	13:54107352:G:A	rs9568867	Primary	OLFM4(+481.2kb)	intergenic	0.23	7	0	0.926	++	0.199	0.043	0.006	1.75e-14	0.237	0.044	0.007	4.48e-10	0.129	0.043	0.01	8.17e-06	OLFM4	OLFM4	OLFM4 [nearest(intergenic)]
TA-meta-398	13:58209492 - 13:58309492	Cross	13:58259492:A:C	rs7324697	Primary	PCDH17	intronic	0.85	48	0	0.743	--	0.529	0.026	0.004	1.12e-08	0.42	0.025	0.006	4.94e-05	0.665	0.028	0.007	5e-05	PCDH17	PCDH17	PCDH17 [nearest(intronic)]
TA-meta-399	13:80667156 - 13:80767156	Cross/EAS/EUR	13:80717156:G:A	rs1359790	Primary	SPRY2(-193kb)	intergenic	0.46	4	0	0.984	--	0.279	-0.082	0.005	5.43e-62	0.279	-0.082	0.007	2.24e-33	0.279	-0.082	0.007	1.76e-30	SPRY2;LINC01038;NDFIP2;NDFIP2-AS1;RBM26	SPRY2	SPRY2 [nearest(intergenic) / Pan-related <PAN_ABC (ductal; PAN_Nasser)> / Non_PAN_ABC (LIV; Brain; SI; Co)] / LINC01038 [Pan-related <PAN_ABC (PAN_Nasser)>] / NDFIP2 [Pan-related <PAN_ABC (PAN_Nasser)> / Non_PAN_ABC (LIV; MuSc; Brain)] / NDFIP2-AS1 [Pan-related <PAN_ABC (PAN_Nasser)> / Non_PAN_ABC (LIV; MuSc; Brain)] / RBM26 [Pan-related <PAN_ABC (PAN_Nasser)> / Non_PAN_ABC (Brain; SI)]
TA-meta-400	13:91892919 - 13:91992919	Cross/EAS	13:91942919:C:T	rs34165267	Primary	GPC5(-108kb)	intergenic	0.49	20	89.8	0.00171	--	0.217	-0.052	0.005	1.44e-21	0.167	-0.071	0.008	4.13e-18	0.257	-0.036	0.007	6.82e-07	GPC5	GPC5	GPC5 [nearest(intergenic)]
TA-meta-401	13:91892919 - 13:91992919	Cross/EAS	13:92283120:G:A	rs1326744	Secondary	GPC5	intronic	NA	NA	0	0.691	--	0.391	-0.025	0.004	3.21e-08	0.399	-0.023	0.006	0.000178	0.381	-0.027	0.007	4.54e-05	GPC5	GPC5	GPC5 [nearest(intronic)]
TA-meta-402	13:109877086 - 13:109977086	Cross	13:109927086:C:T	rs9301365	Primary	MYO16(+66.7kb)	intergenic	0.41	13	0	0.714	++	0.379	0.026	0.005	1.75e-08	0.287	0.024	0.007	0.000294	0.464	0.028	0.006	1.44e-05	FAM155A-IT1;LINC00399;MYO16	MYO16	FAM155A-IT1 [Non_PAN_ABC (MuSc)] / LINC00399 [Non_PAN_ABC (Brain)] / MYO16 [nearest(intergenic)]
TA-meta-403	14:23238935 - 14:23338935	Cross/EUR	14:23288935:C:G	rs17122772	Primary	SLC7A7	5UTR	0.23	5	0	0.484	--	0.187	0.04	0.007	2.79e-09	0.051	0.032	0.014	0.0262	0.226	0.043	0.008	3.31e-08	MRPL52;OXA1L;SLC7A7;MMP14	SLC7A7	MRPL52 [Very-Strongly-Pan-related <PAN_ABC (beta; alpha)> / Non_PAN_ABC (MuSc; THY)] / OXA1L [Very-Strongly-Pan-related <PAN_ABC (beta)> / Non_PAN_ABC (MuSc; THY)] / SLC7A7 [nearest(5UTR) / Pan-related <PAN_ABC (PAN_Nasser)> / Non_PAN_ABC (Adp; LIV; MuSc; THY; SI; Co); Non_PAN_SMR <Pos_Exp (THY)>] / MMP14 [Non_PAN_ABC (MuSc; THY)]
TA-meta-404	14:24828370 - 14:24928370	Cross/EAS	14:24878370:C:T	rs12437434	Primary	NYNRIN	exonic	1	1	30.5	0.23	-+	0.28	-0.049	0.007	1.76e-13	0.286	-0.05	0.007	1.3e-13	0.03	0.004	0.045	0.927	NYNRIN	NYNRIN	NYNRIN [nearest(exonic) / rs12437434 [VEP_Low: R2 (EAS:EUR=1:1)]]
TA-meta-405	14:25887161 - 14:25987161	Cross	14:25937161:A:G	rs28678024	Primary	STXBP6(+417.7kb)	intergenic	0.91	8	0	0.599	++	0.231	-0.032	0.005	6.01e-09	0.131	-0.028	0.009	0.00152	0.291	-0.034	0.007	9.4e-07	STXBP6	STXBP6	STXBP6 [nearest(intergenic)]
TA-meta-406	14:33253298 - 14:33353298	Cross/EAS/EUR	14:33303298:A:G	rs7145828	Primary	AKAP6(+2.7kb)	intergenic	0.39	17	0	0.608	--	0.374	0.036	0.005	1.91e-14	0.244	0.039	0.007	3.43e-08	0.48	0.034	0.006	8.57e-08	AKAP6	AKAP6	AKAP6 [nearest(intergenic)]
TA-meta-407	14:38753756 - 14:38853756	Cross/EAS	14:38803756:A:G	rs2183237	Primary	CLEC14A(+78.2kb)	intergenic	0.08	46	0	0.882	--	0.576	0.039	0.005	3.72e-17	0.462	0.04	0.006	3.57e-11	0.744	0.038	0.007	1.87e-07	CLEC14A	CLEC14A	CLEC14A [nearest(intergenic)]
TA-meta-408	14:58702112 - 14:58802112	Cross	14:58752112:G:A	rs8009527	Primary	C14orf37	intronic	0.15	54	0	0.64	--	0.537	-0.033	0.005	2.26e-11	0.365	-0.031	0.007	1.04e-05	0.715	-0.035	0.007	5.23e-07	C14orf37;PSMA3;RP11-349A22.5;JKAMP;L3HYPDH	PSMA3	C14orf37 [nearest(intronic) / Pan-related <PAN_ABC (alpha; PAN_Nasser)> / Non_PAN_ABC (Adp; LIV; MuSc; ADR; Brain; SI; Co)] / PSMA3 [Very-Strongly-Pan-related <PAN_ABC (beta; alpha; acinar; ductal; PAN_Nasser)> / Non_PAN_ABC (Adp; LIV; MuSc; THY; ADR; Brain; SI; Co)] / RP11-349A22.5 [Pan-related <PAN_ABC (PAN_Nasser)> / Non_PAN_ABC (Adp; LIV; MuSc; THY; ADR; Brain; SI; Co); Non_PAN_SMR <Pos_Exp (…
TA-meta-409	14:69427724 - 14:69527724	Cross	14:69477724:G:T	rs397466	Primary	ACTN1(+31.6kb)	intergenic	0.46	9	0	0.993	--	0.483	-0.037	0.006	8.63e-11	0.12	-0.037	0.01	8.73e-05	0.691	-0.037	0.007	2.62e-07	ACTN1	ACTN1	ACTN1 [nearest(intergenic) / Non_PAN_SMR <Pos_Exp (Blood)>]
TA-meta-410	14:77325691 - 14:77425691	Cross/EAS	14:77375691:C:A	rs17105012	Primary	C14orf166B(+39kb)	intergenic	0.3	17	45.9	0.174	++	0.266	0.037	0.005	2.42e-12	0.328	0.042	0.006	1.1e-10	0.145	0.027	0.009	0.00304	ANGEL1;C14orf166B;IRF2BPL;LOC283575;NRXN3	IRF2BPL	ANGEL1 [Pan-related <PAN_ABC (PAN_Nasser)> / Non_PAN_ABC (Adp; MuSc; THY; ADR; Brain; Co); Non_PAN_SMR <Neg_Exp (Blood)>] / C14orf166B [nearest(intergenic) / Pan-related <PAN_ABC (PAN_Nasser)>] / IRF2BPL [Very-Strongly-Pan-related <PAN_ABC (beta; alpha; acinar; PAN_Nasser)> / Non_PAN_ABC (Adp; MuSc; THY; ADR; Brain; Co)] / LOC283575 [Very-Strongly-Pan-related <PAN_ABC (beta; alpha; acinar)>] / NR…
TA-meta-411	14:79894099 - 14:79994099	Cross/EUR	14:79944099:G:A	rs8008910	Primary	NRXN3	intronic	0.12	14	NA	NA	?+	0.219	0.055	0.008	3.11e-13	NA	NA	NA	NA	0.219	0.055	0.008	4.22e-13	NRXN3	NRXN3	NRXN3 [nearest(intronic)]
TA-meta-412	14:91918127 - 14:92018127	Cross/EAS/EUR	14:91968127:A:C	rs8017764	Primary	SMEK1	intronic	0.36	32	0	0.724	++	0.518	-0.035	0.004	1.41e-15	0.497	-0.034	0.006	2.98e-08	0.542	-0.037	0.006	1e-08	CCDC88C;SMEK1	SMEK1	CCDC88C [Pan-related <PAN_ABC (PAN_Nasser)> / Non_PAN_ABC (Adp; LIV; MuSc; ADR; Brain; SI; Co); Non_PAN_SMR <Pos_Exp (Brain)>] / SMEK1 [nearest(intronic) / Non_PAN_ABC (Adp; LIV)]
TA-meta-413	14:101205172 - 14:101305172	Cross/EAS	14:101255172:A:G	rs73347525	Primary	DLK1(+53.6kb)	intergenic	1	1	41.7	0.19	++	0.225	-0.054	0.006	3.74e-20	0.252	-0.06	0.008	1.49e-14	0.194	-0.045	0.009	1.4e-07	DLK1	DLK1	DLK1 [nearest(intergenic)]
TA-meta-414	14:101205172 - 14:101305172	Cross/EAS	14:101309692:C:T	rs2295387	Secondary	RTL1(-37.3kb)	intergenic	NA	NA	19	0.267	--	0.206	-0.034	0.005	7.48e-10	0.187	-0.027	0.008	0.000441	0.225	-0.039	0.008	2.54e-07	MEG3;RTL1;DLK1;DYNC1H1;MEG8	MEG3	MEG3 [Very-Strongly-Pan-related <PAN_ABC (beta)> / Non_PAN_ABC (MuSc; ADR; Brain)] / RTL1 [nearest(intergenic) / Non_PAN_ABC (Brain)] / DLK1 [Non_PAN_ABC (Brain)] / DYNC1H1 [Non_PAN_ABC (Brain)] / MEG8 [Non_PAN_ABC (Brain)]
TA-meta-415	14:103327321 - 14:103427321	Cross/EAS/EUR	14:103377321:G:A	rs10133111	Primary	TRAF3	3UTR	0.31	22	0	0.409	++	0.306	0.039	0.005	7.22e-15	0.376	0.036	0.006	4.89e-09	0.166	0.044	0.009	2.18e-07	TRAF3;AMN	TRAF3	TRAF3 [nearest(3UTR) / Non_PAN_SMR <Pos_Exp (Brain; Blood)>] / AMN [Non_PAN_ABC (Co)]
TA-meta-416	14:103944961 - 14:104044961	Cross/EUR	14:103994961:T:C	rs1467561	Primary	TRMT61A	upstream	0.09	79	76.9	0.0373	++	0.279	-0.029	0.005	3.57e-08	0.155	-0.015	0.009	0.0809	0.354	-0.038	0.007	1.84e-08	CKB;TRMT61A;APOPT1;BAG5;MARK3	TRMT61A	CKB [rs1803283 [VEP_Medium: R2 (EAS:EUR=0.76:0.96)] / Very-Strongly-Pan-related <PAN_ABC (beta; alpha; acinar; ductal; PAN_Nasser)> / Non_PAN_ABC (Adp; LIV; MuSc; THY; ADR; Brain; SI; Co)] / TRMT61A [nearest(upstream) / Very-Strongly-Pan-related <PAN_ABC (beta; alpha; acinar; ductal; PAN_Nasser)> / Non_PAN_ABC (Adp; LIV; MuSc; THY; ADR; Brain; SI; Co)] / APOPT1 [Very-Strongly-Pan-related <PAN_ABC…
TA-meta-417	15:28457131 - 15:28557131	Cross/EAS	15:28507131:AAG:A	rs80231418	Primary	HERC2	intronic	0.35	12	NA	NA	-?	0.262	-0.042	0.008	2.61e-08	0.262	-0.042	0.008	2.8e-08	NA	NA	NA	NA	HERC2;OCA2	HERC2	HERC2 [nearest(intronic) / rs201872292 [VEP_Low: R2 (EAS:EUR=0.99:0.94)]] / OCA2 [Non_PAN_ABC (MuSc)]
TA-meta-418	15:38778140 - 15:38878140	Cross/EAS/EUR	15:38828140:G:T	rs8043085	Primary	RASGRP1	intronic	0.78	4	0	0.421	++	0.356	0.045	0.005	4.62e-21	0.439	0.048	0.006	3.56e-15	0.23	0.04	0.008	1.17e-07	RASGRP1	RASGRP1	RASGRP1 [nearest(intronic)]
TA-meta-419	15:39609211 - 15:39709211	Cross	15:39659211:G:T	rs1036718	Primary	C15orf54(+112.2kb)	intergenic	0.87	6	3.1	0.31	++	0.439	0.025	0.004	2.41e-08	0.487	0.021	0.006	0.000756	0.385	0.03	0.007	5.04e-06	THBS1;C15orf53;C15orf54	THBS1	THBS1 [Non_PAN_ABC (MuSc); Non_PAN_SMR <Pos_Exp (Blood)>] / C15orf53 [Non_PAN_ABC (MuSc)] / C15orf54 [nearest(intergenic)]
TA-meta-420	15:40569743 - 15:40669743	Cross/EAS	15:40619743:G:T	rs1077476	Primary	C15orf52(-3.9kb)	intergenic	0.32	3	38	0.204	++	0.502	0.056	0.006	5.32e-24	0.385	0.06	0.006	2.04e-21	0.918	0.043	0.012	0.000325	C15orf52;DISP2;INAFM2;IVD;LINC00984	C15orf52	C15orf52 [nearest(intergenic) / Very-Strongly-Pan-related <PAN_ABC (beta; alpha; acinar; ductal; PAN_Nasser)> / Non_PAN_ABC (Adp; LIV; MuSc; THY; ADR; Brain; SI; Co); Non_PAN_SMR <Neg_Exp (THY)>] / DISP2 [Very-Strongly-Pan-related <PAN_ABC (beta; PAN_Nasser)> / Non_PAN_ABC (Adp; LIV; MuSc; THY; ADR; Brain; SI; Co)] / INAFM2 [Very-Strongly-Pan-related <PAN_ABC (beta; alpha; ductal)>] / IVD [Pan-re…
TA-meta-421	15:40569743 - 15:40669743	Cross/EAS	15:40380852:G:A	rs2242186	Secondary	BMF	3UTR	NA	NA	0	0.595	++	0.128	0.056	0.008	3.44e-13	0.154	0.054	0.009	1.4e-09	0.047	0.063	0.016	4.41e-05	BMF;BUB1B;C15orf52;SRP14;SRP14-AS1	BMF	BMF [nearest(3UTR) / Non_PAN_ABC (LIV; Brain)] / BUB1B [Non_PAN_ABC (LIV)] / C15orf52 [Non_PAN_SMR <Neg_Exp (THY)>] / SRP14 [Non_PAN_ABC (LIV; Brain)] / SRP14-AS1 [Non_PAN_ABC (LIV; Brain)]
TA-meta-422	15:40569743 - 15:40669743	Cross/EAS	15:40398754:C:T	rs484943	Secondary	BMF	intronic	NA	NA	0	0.411	++	0.286	0.035	0.005	6.63e-11	0.244	0.04	0.008	3.7e-07	0.324	0.031	0.007	2.87e-05	BMF;BUB1B;PAK6;SRP14;SRP14-AS1	BMF	BMF [nearest(intronic) / Strongly-Pan-related <PAN_ABC (acinar; PAN_Nasser)> / Non_PAN_ABC (Adp; LIV; MuSc; THY; Brain; SI; Co)] / BUB1B [Pan-related <PAN_ABC (PAN_Nasser)> / Non_PAN_ABC (LIV; MuSc; SI; Co)] / PAK6 [Pan-related <PAN_ABC (PAN_Nasser)> / Non_PAN_ABC (LIV)] / SRP14 [Pan-related <PAN_ABC (PAN_Nasser)> / Non_PAN_ABC (LIV; SI)] / SRP14-AS1 [Pan-related <PAN_ABC (PAN_Nasser)> / Non_PAN_…
TA-meta-423	15:40569743 - 15:40669743	Cross/EAS	15:40691052:A:C	rs62018005	Secondary	KNSTRN(+4.6kb)	intergenic	NA	NA	87	0.00553	--	0.493	0.038	0.005	6.79e-16	0.328	0.05	0.006	1.3e-14	0.674	0.024	0.007	0.000356	C15orf52;C15orf57;IVD;KNSTRN	KNSTRN	C15orf52 [Non_PAN_SMR <Neg_Exp (THY)>] / C15orf57 [Non_PAN_SMR <Pos_Exp (Blood)>] / IVD [Non_PAN_SMR <Pos_Exp (Brain; Blood)>] / KNSTRN [nearest(intergenic)]
TA-meta-424	15:41751512 - 15:41851512	Cross/EUR	15:41801512:G:T	rs2289739	Primary	LTK	intronic	0.34	50	92.6	0.00023	++	0.281	0.031	0.005	1.64e-09	0.17	0.008	0.008	0.339	0.356	0.047	0.007	2.58e-12	LTK;MGA;RP11-107F6.3;RPAP1	LTK	LTK [nearest(intronic)] / MGA [Non_PAN_SMR <Pos_Exp (Blood)>] / RP11-107F6.3 [Non_PAN_SMR <Pos_Exp (Blood)>] / RPAP1 [Non_PAN_SMR <Pos_Exp (Adp-Vis; MuSc; Co; Blood) / Neg_Exp (Brain)>]
TA-meta-425	15:43939518 - 15:44039518	Cross	15:43989518:A:G	rs2467426	Primary	CKMT1A:STRC	intronic:intronic	0.14	95	0	0.619	++	0.268	-0.034	0.006	2.67e-09	0.331	-0.032	0.007	1.58e-06	0.099	-0.038	0.011	0.000411	CKMT1A;CATSPER2;MAP1A;STRC;STRCP1	CKMT1A	CKMT1A [nearest(intronic:intronic) / Non_PAN_SMR <Neg_Exp (THY)>] / CATSPER2 [Non_PAN_SMR <Neg_Exp (Blood)>] / MAP1A [Non_PAN_SMR <Neg_Exp (Blood)>] / STRC [Non_PAN_SMR <Neg_Exp (Brain)>] / STRCP1 [Non_PAN_SMR <Neg_Exp (Brain)>]
TA-meta-426	15:49841094 - 15:49941094	Cross	15:49891094:C:T	rs11632201	Primary	FAM227B	intronic	0.16	7	0	0.577	--	0.508	-0.026	0.004	2.88e-09	0.492	-0.024	0.006	8.34e-05	0.525	-0.029	0.006	7.54e-06	DTWD1;FAM227B	DTWD1	DTWD1 [Very-Strongly-Pan-related <PAN_ABC (beta; PAN_Nasser)> / Non_PAN_ABC (LIV; MuSc; ADR; Brain)] / FAM227B [nearest(intronic) / Pan-related <PAN_ABC (PAN_Nasser)> / Non_PAN_ABC (LIV; MuSc; ADR; Brain); Non_PAN_SMR <Pos_Exp (Adp-Sub)>]
TA-meta-427	15:52537740 - 15:52637740	Cross/EAS	15:52587740:G:T	rs149336329	Primary	MYO5C	intronic	1	1	64.8	0.0917	--	0.048	-0.097	0.011	5.96e-19	0.051	-0.114	0.015	1.46e-14	0.044	-0.077	0.016	2.09e-06	MYO5C;MYO5A	MYO5C	MYO5C [nearest(intronic) / Very-Strongly-Pan-related <PAN_ABC (beta; acinar; ductal; PAN_Nasser)> / Non_PAN_ABC (LIV; MuSc; THY; ADR; Brain; SI; Co); Non_PAN_SMR <Neg_Exp (THY; ADR; PIT; Co; Blood)>] / MYO5A [Pan-related <PAN_ABC (PAN_Nasser)>]
TA-meta-428	15:52537740 - 15:52637740	Cross/EAS	15:53085659:C:T	rs78056450	Secondary	ONECUT1(+2.4kb)	intergenic	NA	NA	42.6	0.187	++	0.18	0.036	0.006	3.5e-10	0.206	0.03	0.007	5.15e-05	0.14	0.045	0.009	7.38e-07	ONECUT1;DMXL2;LYSMD2;PIGB;SCG3	ONECUT1	ONECUT1 [nearest(intergenic) / Strongly-Pan-related <PAN_ABC (acinar; ductal; PAN_Nasser)> / Non_PAN_ABC (LIV; MuSc; Brain); Non_PAN_SMR <Pos_Exp (Brain)>] / DMXL2 [Pan-related <PAN_ABC (PAN_Nasser)>] / LYSMD2 [Pan-related <PAN_ABC (PAN_Nasser)>] / PIGB [Pan-related <PAN_ABC (PAN_Nasser)>] / SCG3 [Pan-related <PAN_ABC (PAN_Nasser)>]
TA-meta-429	15:57302893 - 15:57402893	Cross/EUR	15:57352893:T:C	rs2585110	Primary	TCF12	intronic	0.06	158	0	0.786	--	0.041	0.066	0.012	2.71e-08	0.025	0.062	0.02	0.00182	0.05	0.068	0.015	3.84e-06	TCF12	TCF12	TCF12 [nearest(intronic) / Non_PAN_ABC (Co)]
TA-meta-430	15:62349093 - 15:62449093	Cross/EAS/EUR	15:62399093:A:C	rs11856307	Primary	C2CD4A(+36kb)	intergenic	0.14	7	91.5	0.000589	++	0.417	-0.063	0.004	6.57e-47	0.406	-0.077	0.006	1.64e-37	0.429	-0.047	0.006	4.48e-13	C2CD4A;VPS13C	C2CD4A	C2CD4A [nearest(intergenic) / Very-Strongly-Pan-related <PAN_ABC (beta)>] / VPS13C [Non_PAN_SMR <Pos_Exp (Blood) / Neg_Exp (Adp-Sub; THY; Brain; PIT)>]
TA-meta-431	15:64062732 - 15:64162732	Cross/EUR	15:64112732:A:C	rs11635117	Primary	HERC1	intronic	0.33	3	0	0.48	++	0.446	-0.035	0.006	1.75e-10	0.082	-0.029	0.011	0.0105	0.564	-0.038	0.006	3.58e-09	HERC1;DAPK2;FBXL22;USP3;USP3-AS1	HERC1	HERC1 [nearest(intronic) / rs2228510 [VEP_Low: R2 (EAS:EUR=0.51:0.86)] / Very-Strongly-Pan-related <PAN_ABC (beta; alpha; acinar; ductal; PAN_Nasser)> / Non_PAN_ABC (Adp; LIV; MuSc; THY; ADR; Brain; SI; Co)] / DAPK2 [Strongly-Pan-related <PAN_ABC (acinar; PAN_Nasser)> / Non_PAN_ABC (LIV; MuSc; ADR; Brain; Co)] / FBXL22 [Pan-related <PAN_ABC (alpha; PAN_Nasser)> / Non_PAN_ABC (Adp; LIV; MuSc; THY;…
TA-meta-432	15:68030886 - 15:68130886	Cross/EAS/EUR	15:68080886:T:A	rs4776970	Primary	MAP2K5	intronic	1	1	0	0.645	++	0.445	0.04	0.005	2.56e-16	0.223	0.042	0.007	2.56e-09	0.642	0.038	0.007	1.69e-08	MAP2K5;RP11-34F13.2;SKOR1	MAP2K5	MAP2K5 [nearest(intronic) / Non_PAN_SMR <Neg_Exp (Blood)>] / RP11-34F13.2 [Non_PAN_SMR <Pos_Exp (Adp-Sub)>] / SKOR1 [Non_PAN_SMR <Neg_Exp (THY)>]
TA-meta-433	15:73935223 - 15:74035223	Cross	15:73985223:C:T	rs2127015	Primary	CD276	intronic	0.42	5	0	0.355	--	0.491	-0.026	0.005	1.38e-08	0.479	-0.022	0.007	0.000967	0.502	-0.03	0.006	2.26e-06	CD276	CD276	CD276 [nearest(intronic) / Non_PAN_ABC (Co)]
TA-meta-434	15:75764388 - 15:75864388	Cross/EAS/EUR	15:75814388:C:T	rs6495182	Primary	PTPN9	intronic	0.41	5	0	0.545	--	0.328	-0.042	0.005	4.15e-19	0.386	-0.04	0.006	9.34e-11	0.242	-0.046	0.007	9.32e-10	IMP3;SNUPN;PTPN9;SIN3A;SNX33	SNUPN	IMP3 [Very-Strongly-Pan-related <PAN_ABC (beta; alpha; acinar; ductal; PAN_Nasser)> / Non_PAN_ABC (Adp; LIV; MuSc; THY; ADR; Brain; SI; Co); Non_PAN_SMR <Neg_Exp (Blood)>] / SNUPN [Very-Strongly-Pan-related <PAN_ABC (beta; alpha; acinar; ductal; PAN_Nasser) / PAN-SMR (Pos_Exp)> / Non_PAN_ABC (Adp; LIV; MuSc; THY; ADR; Brain; SI; Co); Non_PAN_SMR <Neg_Exp (Co; Blood)>] / PTPN9 [nearest(intronic) /…
TA-meta-435	15:77732335 - 15:77832335	Cross/EAS/EUR	15:77782335:A:G	rs12910361	Primary	HMG20A(+4.4kb)	intergenic	0.99	1	19.9	0.264	--	0.529	0.076	0.005	1.25e-61	0.398	0.071	0.006	6.53e-32	0.707	0.081	0.007	3.95e-31	HMG20A;PEAK1;CTD-2632K10.1;PSTPIP1;TSPAN3	HMG20A	HMG20A [nearest(intergenic) / Pan-related <PAN_ABC (PAN_Nasser)> / Non_PAN_ABC (Adp; LIV; MuSc; ADR; Brain; Co); Non_PAN_SMR <Pos_Exp (Adp-Sub; Adp-Vis; THY; Brain; PIT; Co; Blood)>] / PEAK1 [Pan-related <PAN_ABC (PAN_Nasser)> / Non_PAN_ABC (Adp; LIV; MuSc; ADR; Brain; Co); Non_PAN_SMR <Pos_Exp (Brain; Blood)>] / CTD-2632K10.1 [Pan-related <PAN_ABC (PAN_Nasser)> / Non_PAN_ABC (Co)] / PSTPIP1 [Pan…
TA-meta-436	15:80297817 - 15:80397817	Cross	15:80347817:C:T	rs66639842	Primary	ZFAND6(-4.1kb)	intergenic	0.23	10	0	0.588	++	0.466	0.026	0.005	2e-08	0.299	0.024	0.007	0.000358	0.629	0.029	0.007	1.18e-05	ZFAND6;LINC01314;MTHFS;ST20;ST20-MTHFS	ZFAND6	ZFAND6 [nearest(intergenic) / Very-Strongly-Pan-related <PAN_ABC (beta; alpha; acinar; ductal; PAN_Nasser)> / Non_PAN_ABC (Adp; LIV; MuSc; ADR; Brain; SI; Co)] / LINC01314 [Very-Strongly-Pan-related <PAN_ABC (beta; alpha; acinar)>] / MTHFS [Very-Strongly-Pan-related <PAN_ABC (beta; alpha; acinar; ductal; PAN_Nasser)> / Non_PAN_ABC (LIV; MuSc; ADR; Brain; SI; Co)] / ST20 [Very-Strongly-Pan-related…
TA-meta-437	15:90376689 - 15:90476689	Cross/EAS/EUR	15:90426689:G:A	rs8027198	Primary	AP3S2:C15orf38-AP3S2	intronic:intronic	0.21	12	0	0.528	++	0.236	0.062	0.005	2.47e-32	0.207	0.058	0.008	2.3e-14	0.263	0.065	0.007	2.31e-19	AP3S2;ANPEP;C15orf38-AP3S2;C15orf38;MESP2	AP3S2	AP3S2 [nearest(intronic:intronic) / rs12440156 [VEP_Medium: R2 (EAS:EUR=0.97:0.93)] / Pan-related <PAN-SMR (Neg_Exp)> / Non_PAN_ABC (MuSc; SI); Non_PAN_SMR <Pos_Exp (Brain; Blood) / Neg_Exp (Adp-Sub; Adp-Vis; LIV; MuSc; THY; ADR; PIT; SI; Co; KID)>] / ANPEP [Strongly-Pan-related <PAN_ABC (acinar)> / Non_PAN_ABC (Adp; LIV; MuSc; ADR; Brain; SI; Co); Non_PAN_SMR <Neg_Exp (Adp-Vis; MuSc; Blood)>] / …
TA-meta-438	15:91462067 - 15:91562067	Cross/EAS/EUR	15:91512067:G:A	rs2290203	Primary	PRC1	intronic	0.58	9	0	0.984	++	0.386	0.06	0.005	8.96e-37	0.49	0.061	0.006	5.09e-24	0.205	0.06	0.008	1.45e-14	HDDC3;UNC45A;PRC1;RCCD1;VPS33B	UNC45A	HDDC3 [Very-Strongly-Pan-related <PAN_ABC (beta; alpha; ductal)> / Non_PAN_ABC (MuSc; Brain); Non_PAN_SMR <Pos_Exp (Adp-Vis; THY; Blood)>] / UNC45A [Very-Strongly-Pan-related <PAN_ABC (beta; alpha; ductal) / PAN-SMR (Pos_Exp)> / Non_PAN_ABC (MuSc; Brain)] / PRC1 [nearest(intronic) / rs2285937 [VEP_Medium: R2 (EAS:EUR=0.88:0.37)] / Pan-related <PAN_ABC (PAN_Nasser)> / Non_PAN_ABC (LIV; MuSc; ADR; …
TA-meta-439	15:93782067 - 15:93882067	Cross/EAS	15:93832067:A:G	rs7167984	Primary	RGMA(+199.6kb)	intergenic	0.3	21	2.5	0.311	--	0.582	0.041	0.006	1.47e-13	0.441	0.045	0.007	4.21e-11	0.869	0.033	0.01	0.000676	RGMA	RGMA	RGMA [nearest(intergenic)]
TA-meta-440	15:93782067 - 15:93882067	Cross/EAS	15:93925694:C:T	rs11637051	Secondary	RGMA(+293.3kb)	intergenic	NA	NA	0	0.696	--	0.518	-0.031	0.005	3.9e-11	0.412	-0.033	0.007	9.44e-07	0.618	-0.029	0.007	7.74e-06	RGMA	RGMA	RGMA [nearest(intergenic)]
TA-meta-441	15:95213911 - 15:95313911	Cross	15:95263911:T:C	rs7168523	Primary	MCTP2(+240.3kb)	intergenic	0.11	31	0	0.891	--	0.33	0.028	0.005	3.31e-09	0.297	0.029	0.006	1.21e-05	0.368	0.027	0.007	7.8e-05	MCTP2	MCTP2	MCTP2 [nearest(intergenic)]
TA-meta-442	15:99316409 - 15:99416409	Cross/EAS	15:99366409:A:G	rs79826452	Primary	IGF1R	intronic	0.56	27	0	0.5	++	0.115	-0.062	0.011	7.09e-09	0.115	-0.062	0.011	8.58e-09	0	-0.333	0.401	0.406	IGF1R	IGF1R	IGF1R [nearest(intronic)]
TA-meta-443	16:250177 - 16:350177	Cross/EUR	16:300177:A:G	rs6600204	Primary	ITFG3	intronic	0.13	10	86.9	0.00572	++	0.327	-0.04	0.005	1.76e-15	0.409	-0.03	0.006	1.46e-06	0.171	-0.059	0.009	4.95e-12	ITFG3;ARHGDIG;FAM234A;RGS11	ITFG3	ITFG3 [nearest(intronic) / Non_PAN_SMR <Neg_Exp (Adp-Sub; Adp-Vis; MuSc; Blood)>] / ARHGDIG [Non_PAN_SMR <Neg_Exp (MuSc)>] / FAM234A [Non_PAN_SMR <Neg_Exp (Brain)>] / RGS11 [Non_PAN_ABC (Co)]
[truncated: 101 more rows]

## Sheet: ST4
Supplementary Table 4. T2D-associated loci where were specifically significant in single-ancestry meta-analysis
[truncated: 25 more rows]

## Sheet: ST5
Supplementary Table 5. Insulin high beta cells driving heritability enrichment of T2D in pancreatic alpha, delta, and gamma cells
[truncated: 20 more rows]

[truncated: 9 more sheets: ST6, ST7, ST8, ST9, ST10, ST11, ST12, ST13, ST14]
